# Supplementary material
Source: publisher figshare collection journal article supplement (https://gsapubs.figshare.com/articles/dataset/_/14271662)
Supplement: Supplementary file 1 [file 2]

## Sheet: export_Tibet_Geochem
Data source	sample	Age	Age error	Lat	Long	87Sr/86Sr(i)	ŒµNd(t)	ŒµHf(t)	Œ¥18O	SiO2	TiO2	Al2O3	Fe2O3	FeO	MnO	MgO	CaO	Na2O	K2O	P2O5	Sc	V	Cr	Co	Ni	Cu	Mo	Zn	Ga	Ge	Rb	Sr	Y	Zr	Nb	Cs	Ba	La	Ce	Pr	Nd	Sm	Eu	Gd	Tb	Dy	Ho	Er	Tm
Aikman et al., 2008	Dala granitoids	44.1	1.2	28.632	92.2201
Aikman et al., 2012	310014			28.9125	91.9038					44.96	1.33	14.27	11.14		0.16	7.16	9.9	0.78	0.01	0.13	41.8	293.3	179.2	46.5	87.7	120.2			13		0.3	297.9	24.4	63.6	6.3		2	6.3	13.8	1.9	9.4	2.8	1.1	3.8	0.6	4.4	0.9	2.7	0.4
Aikman et al., 2012	310019	42		28.8866	91.9261	0.713996	-10.8554			74.29	0.04	14.72	0.3		0.01	0.03	1.02	5.65	2.04	0.04	2	39.1	10.9	34	3.4	7.7			25.1		90.9	128.5	3.7	20.9	3	31.4	161.6	6.6	13.9	1.5	5.8	1.6	0.3	1.4	0.2	0.8	0.1	0.3
Aikman et al., 2012	310021	42.3	4.9	28.8266	92.0339	0.808336	-8.09474			75.12	0.07	12.9	1.27		0.06	0.04	0.55	2.87	6.04	0.12	7.7	37.2	9	52.1	1.9	3.1			26.8		378.1	74.9	35.6	49.7	11	7.2	180	8.5	20.5	2.4	8.9	3.1	0.2	3.6	0.8	6.2	1.3	4	0.7
Aikman et al., 2012	310037	42		28.8866	91.9261	0.715021	-9.93965			71.85	0.05	15.78	0.17		0.01	0.03	0.61	4.47	5.06	0.03	2	39.7	13.2	49.7	3.3	4.9			52.5		240.2	128.3	1.5	8.7	3.6	14.4	576.6	4.1	8.7	0.9	3.5	0.9	0.3	0.8		0.4		0.1
Aikman et al., 2012	310038	42.3	4.9	28.8866	91.9261	0.728992	-12.8871			74.14	0.03	15.54	1.03		0.14	0.02	0.36	4.15	2.36	0.02	1.5	37.5	12.2	46.9	4.3	2.6			22.1		164.9	29.6	14.1	28.7	5.4	3.9	49.1	2.4	4.4	0.4	1.4	0.6		0.8	0.2	1.9	0.4	1	0.2
Aikman et al., 2012	405005			28.9493	91.8832					46.54	0.91	13.61	10.27		0.19	9.33	13.39	1.59	0.02	0.06	50.9											123.9	15.9	38	2.2		2.7	2.2	5.7	0.9	4.9	1.7	0.7	2.5	0.4	3	0.6	1.8	0.3
Aikman et al., 2012	405008	44		28.6227	92.2213	0.713622	-12.0591			71.65	0.28	16.53	1.75		0.04	0.84	2.76	3.77	2.97	0.13	5.4	69.9	14.4	35.2	5.5	2.8			67.5		125.4	340.2	6.2	124.3	5.2	9	436.7	30	61.4	6.5	22.9	4.6	1.1	3.5	0.3	1.5		0.6
Aikman et al., 2012	405011	44		28.5963	92.2208	0.713706	-12.5915			71.01	0.27	15.85	1.71		0.03	0.81	2.66	3.71	3.01	0.12	5.1	69.5	17.1	35.9	6	3			64.8		124.3	336.1	6.2	116.6	4.8	10.3	438.8	27	54.3	5.8	20.5	4.2	1	2.9	0.3	1.4		0.6
Aikman et al., 2012	405013	44		28.5087	92.2639	0.714261	-10.2873			68.92	0.36	15.9	2.42		0.04	1.23	2.14	3.66	3.11	0.13	6.6	82.9	44.9	26.1	20.7	13.2			58.1		144.7	280.7	7.7	121.7	7.5	6.3	368.9	26.5	54.5	5.7	19.1	4.1	0.9	3.1	0.4	1.6		0.7
Aikman et al., 2012	410004			28.5553	92.2437					48.35	2.79	16.14	13.41		0.13	8.7	0.63	2.49	0.4	0.33	27.5										12.3	91.6	30	208.3	13.8	1.6	86.3	21.2	48.2	6.1	27	6.4	1.6	6.6	1	6.1	1.1	3.1	0.4
Aikman et al., 2012	410005			28.5918	92.2707					50.35	4.04	13.61	12.38		0.18	4.52	7.68	3.1	1.39	0.31	29.2										40.4	335.5	32.1	230.8	15.6	2.8	311.7	25.8	55.5	7.1	31.1	7.2	2.1	7.2	1	6.5	1.2	3.3	0.5
Aikman et al., 2012	410007	44.1	1	28.6433	92.2202	0.710937	-12.8421			62.12	0.32	20.21	2.05		0.04	0.98	3.73	5.18	3.18	0.14	5.4										122.7	478.6	7	128.6	6.3	9	610.3	36.9	74.9	8	31.1	5.7	1.4	3.7	0.4	1.5	0.2	0.6
Aikman et al., 2012	410008	44		28.6433	92.2202	0.713158	-13.32			69.79	0.29	15.78	1.63		0.03	0.77	2.95	3.86	2.71	0.1	4.7										116.2	348.3	5.5	97.5	4.6	5.7	353.7	25.8	52.6	5.6	21.7	4.1	1	2.8	0.3	1.2	0.2	0.5
Aikman et al., 2012	410009	44		28.6708	92.2011	0.713375	-13.2577			69.97	0.28	15.8	1.75		0.04	0.83	2.82	3.72	2.87	0.12	5.2										121.1	344.3	5.8	107	5.3	5.7	419.9	31.1	63.9	6.7	25.9	4.7	1.1	3.2	0.3	1.3	0.2	0.5
Aikman et al., 2012	410010	44		28.7276	92.1643	0.709145	-12.803			70.02	0.24	15.57	1.42		0.02	0.68	2.87	4.35	2.89	0.15	4.3										90.5	425.8	7.8	113.4	4.6	3.8	460.6	36.2	74.9	7.9	30.3	5.5	1.3	3.5	0.3	1.5	0.3	0.7
Aikman et al., 2012	410012	44		28.7514	92.1575	0.707716	-10.8977			70.9	0.24	15.31	1.55		0.02	0.59	2.58	4.09	2.81	0.05	4.4										113.3	548.3	5.4	60.3	4.5	4	647.2	8.6	17.1	1.9	7.1	1.4	0.6	1.3	0.2	1	0.2	0.5
Aikman et al., 2012	410019			28.8003	91.6688					47.87	3.37	11.5	17.97		0.26	4.35	7.96	2.47	0.93	0.44	45.6										29.7	157.8	62.5	262.1	25.1	0.9	289.2	25.2	52	6.7	31.3	8.2	2.4	10.2	1.7	11.4	2.4	7.1	1
Aikman et al., 2012	410024			29.245	91.7086					55.78	0.59	17.81	6.58		0.17	2.74	5.75	3.94	2.77	0.41	11.6										75.6	371.1	19.2	116.5	6	1.5	370.9	22.4	41.4	4.6	18.7	3.7	1.2	3.4	0.5	3.3	0.7	2.2	0.3
Aikman et al., 2012	410026			29.2567	91.568					43.75	0.04	2.18	8.48		0.13	39.99	2.33				15.2											0.3	1.2	0.2			0.2									0.2		0.2
Aikman et al., 2012	410027			29.2498	91.4663					54.23	0.31	13.62	7.7		0.14	8.95	7.97	3.6	0.64	0.02	41.4										3.4	68.1	7.8	11.6	0.1	0.4	17.7	0.4	1.2	0.2	1.3	0.6	0.2	0.9	0.2	1.4	0.3	0.9	0.1
Aikman et al., 2012	410028			29.2498	91.4663					54.67	0.62	16.39	8.68		0.15	4.6	4.67	6.31	0.2	0.04	32.1										1.3	96.7	11.8	23.4	0.1	0.2	10.3	0.7	2	0.4	2.3	1	0.4	1.5	0.3	2.1	0.5	1.4	0.2
Aikman et al., 2012	410033			28.8855	91.6202					47.2	1.17	15.36	10.89		0.17	6.96	11.19	2.21	0.19	0.1	49.2										4.6	207.7	24.5	59.3	3.5	1.8	71.4	6.4	13.3	1.7	8.5	2.5	0.9	3.4	0.6	4.3	0.9	2.9	0.4
Aikman et al., 2012	410036			28.9069	91.5962					43.73	2.96	13.59	14.26		0.2	6.71	5.79	2.78	0.07	0.54	28.6										1.9	496.8	28.3	175	38.1	1.8	103	30.1	60.8	7.5	32.4	7	2.2	6.8	1	5.8	1.1	3	0.4
Aikman et al., 2012	410037			28.9416	91.6538					47.1	0.74	16.7	8.6		0.14	7.91	12.07	1.79	0.02	0.06	36.6										0.5	221.2	15.3	41.3	3.9	0.2	9.9	4.8	9.9	1.3	5.9	1.7	0.7	2.3	0.4	2.7	0.6	1.8	0.2
Aikman et al., 2012	410041			29.0714	91.7089					49.92	2.24	13.09	12.48		0.19	5.97	10.1	2.58	0.02	0.22	40.8											568.2	31.8	133	8.7		5.7	10.9	25.2	3.6	17.2	4.9	1.7	5.9	0.9	6.2	1.3	3.4	0.5
Aikman et al., 2012	410084			28.8355	92.0573					50.61	3.41	13.21	11.37		0.16	5.05	9.55	3.1	1.13	0.43	25.7										33.1	410.9	32.5	247.6	24.6	3.6	115	27.2	59.5	7.9	35.6	8.2	2.6	8	1.1	6.9	1.3	3.4	0.4
Aikman et al., 2012	410086			28.8355	92.0573					51.14	1.17	15.32	11.89		0.25	6.55	10.45	0.97	0.29	0.12	42.6										7.7	97.5	23.8	70.3	2.1	15.9	56.5	4.2	10.5	1.6	8.1	2.6	1.1	3.6	0.6	4.3	0.9	2.7	0.4
Aikman et al., 2012	602008	20.2	2	27.5037	92.1251	0.823522	-14.6404			67.95	0.22	17	1.67		0.02	0.45	1.18	3.8	6.75	0.09	4.9	68.8	12.9	37.2	7.2	2.7			16.9		231.9	157.3	30.2	112	8.7	5.9	1002.6	47.7	95.7	10.8	41.8	10	1.8	10	1.3	6.9	1.1	2.5	0.3
Aikman et al., 2012	602009	20		27.5625	92.0266	0.798495	-15.0926			74.74	0.18	13.26	1.48		0.02	0.37	1.14	3.06	3.99	0.06	5.4	68	12	43.1	7	8.7			15.3		142.6	90.3	11.1	83.7	7.1	7.7	508.9	29.8	60.4	6.8	26.2	5.9	0.9	5.3	0.6	2.9	0.4	1	0.1
Aikman et al., 2012	602010	20		27.6059	91.9726	0.802828	-15.041			76.01	0.1	15.23	1		0.01	0.25	1.13	3.26	1.92	0.08	4.9	69.5	9.1	30.9	5.9	3			20.9		85.8	61.4	7.6	46.6	6.1	3.3	148.6	13.8	27.6	3.1	11.6	3	0.5	2.7	0.4	1.9	0.3	0.7
Aikman et al., 2012	2004T263	18.8		27.9797	91.9229	0.759556	-13.1412			72.38	0.11	14.94	0.89		0.02	0.13	1.01	4.24	5.37	0.13	4.6	62.7	7.2	33.8	2.8	8			24.5		318.9	54.6	9.3	43.6	9.8	15.2	180.9	17.8	37	4.3	16.8	4.5	0.6	4.1	0.5	2.3	0.3	0.7
Aikman et al., 2012	2004T264	18.8		27.9797	91.9229	0.757474	-12.9471			73.47	0.08	14.8	0.91		0.02	0.1	0.91	3.64	4.86	0.1	3.9	61.5	8	35.4	2.7	2.4			23.6		333.6	32.7	8.1	33.8	11.6	15.8	90.7	12	24.6	2.9	11	3.3	0.3	3.2	0.4	2.1	0.3	0.6
Aikman et al., 2012	2004T265	18.8	1.2	27.9797	91.9229	0.777122	-14.0241			74.55	0.07	15.01	0.74		0.02	0.09	0.75	4.07	3.95	0.1	4.9	61.3	8.4	51.8	2.9	2			22.3		227.9	35.1	15.4	49.4	17.1	8.7	54.9	8.2	16.4	1.9	7.3	2.4	0.3	3.1	0.5	3.1	0.5	1.2	0.1
Aitchison et al., 2009	31A	19.5	0.2	29.345	89.6378
Aitchison et al., 2009	31B	19.7	1	29.345	89.6378
Aitchison et al., 2009	Kailas tuff	16.9	0.4	30.9744	81.4826
Aminov et al., 2017	BK 1.1	91.8	1.9	37.3534	74.9098	0.708197	-8.41	-10.3		59.27	0.8	16.15	6.21		0.1	3.55	4.38	2.98	3.74	0.28	19.53		68.6	12.71	6.62	6.74		47.3			152	581	21.3	182	12.3	6.54	780	29.7	61.1	6.88	30.2	5.99	1.41	6.14	0.67	4.13	0.73	2.33	0.31
Aminov et al., 2017	BK 1.2	99	2.5	37.354	74.9226	0.706879	-4.72	-3.79		62.8	0.61	13.98	5.19		0.09	3.17	4.23	2.72	5.06	0.39	14.49		93.7	13.15	17.98	24.23		47.9			246	481	17.5	223	14.8	2.83	963	34.1	66.9	7.29	31.4	5.96	1.33	6.1	0.59	3.51	0.6	1.89	0.26
Aminov et al., 2017	BK 1.3	94.4	1.2	37.3403	74.9063	0.707168	-8.34	-11.07		63.28	0.68	15.57	5.36		0.1	2.65	4.39	2.76	3.96	0.22	18.68		198.9	19	45.33	18.35		66.3			168	272	20.8	225	13.4	4.27	1030	33.4	77.7	7.99	35.9	6.77	1.58	7.02	0.71	4.27	0.74	2.3	0.3
Aminov et al., 2017	BK 10.4	107.1	2.3	37.429	74.7339	0.708566	-9.11	-8.83		63.42	0.6	15.99	4.62		0.06	1.79	3.21	3.33	3.17	0.14	6.82		4.27	5.63	1.89	4.55		61.3			91	229	12.4	168	10.7	5.31	538	23.2	48.2	5.41	23.5	4.52	0.99	4.59	0.46	2.62	0.43	1.29	0.17
Aminov et al., 2017	BK 3.1	95.1	1.1	37.331	75.048	0.709624	-9.17	-9.41		68.67	0.4	14.59	3.19		0.05	0.95	1.21	2.8	5.65	0.15	5.74		9.97	3.42	2.21	4.98		40.5			212	184	16	247	13.6	7.59	1000	36.9	75.4	7.85	32.8	5.78	0.98	6.04	0.55	3.27	0.56	1.82	0.25
Aminov et al., 2017	BK 5.4	96.9	1	37.3414	74.9978	0.707583	-6.89			56.17	0.94	15.41	7.75		0.13	5.5	6.98	2.14	3.51	0.3	2.89		3.18	0.86	0.86	17.28		16.8			212	308	19	226	15.3	5.28	610	30.9	57.9	6.41	26.4	4.89	1.02	4.99	0.58	3.62	0.68	2.23	0.35
Aminov et al., 2017	BK 6.5	94.1	1.4	37.3456	74.9453	0.70819	-8.44			63.16	0.64	15.78	5.27		0.1	2.62	4.51	2.76	3.83	0.22	13.79		49.43	8.79	5.26	7		61.2			136	447	17.9	182	11.5	3.97	756	29.6	58.5	6.39	27.1	5.11	1.16	5.34	0.57	3.48	0.62	1.99	0.27
Aminov et al., 2017	DZH001	101.4	1.8	37.4615	74.6509	0.70794	-8.11	-16.85		60.76	0.7	16.43	5.69		0.09	3.42	5.04	2.83	3.03	0.26	21.04		69.7	12.18	5.03	3.04		29.8			101	564	22.9	192	13	5.48	838	36.9	73.4	8.03	30.2	5.95	1.39	5.5	0.72	4.06	0.79	2.34	0.35
Aminov et al., 2017	DZH002	102.5	2.3	37.4634	74.6588	0.708047	-8.2	-11.77		60.38	0.72	15.83	5.72		0.08	3.12	4.19	3.14	3.67	0.25	19.12		58.5	12.32	5.29	2.68		28.9			133	497	23.3	170	14.2	12	779	38.7	77.1	8.41	31.6	6.17	1.28	5.57	0.75	4.12	0.81	2.37	0.37
Aminov et al., 2017	DZH007	109.6	1.7	37.4495	74.608	0.707989	-8.35	-11.68		61.93	0.7	16.48	5.36		0.1	2.56	4.79	2.72	3.52	0.23	16.49		47.3	9.85	4.58	7.5		63.7			133	486	22.6	215	14	3.9	829	35.6	72.8	8.1	31	6.17	1.36	5.44	0.72	4.05	0.78	2.26	0.34
Aminov et al., 2017	DZH019	101.7	1.2	37.452	74.5987	0.708093	-8.26	-12.13		62.96	0.66	16.13	5.06		0.09	2.44	4.35	2.68	3.76	0.22	16.25		51.92	9.71	4.55	7.47		62.2			158	471	21.3	199	13.5	4.8	801	39.5	79	8.55	31.8	6.04	1.31	5.47	0.69	3.84	0.72	2.14	0.33
Aminov et al., 2017	DZH021	102.3	1.5	37.4574	74.6057	0.708086	-8.35	-11.8		62.23	0.69	16.6	5.35		0.09	2.57	4.84	2.77	3.55	0.23	16.81		53.6	9.98	4.69	7.35		65.9			139	506	23.2	215	14.5	4.25	851	37.2	75.7	8.4	32	6.36	1.39	5.71	0.74	4.19	0.8	2.31	0.36
Aminov et al., 2017	KZ1-01	103.9	1.9	37.5095	74.541	0.708132	-8.29			62.72	0.64	16.07	4.4		0.06	2.84	3.9	2.57	3.96	0.22	16.36		49.9	10.71	4.74	5.36		66.4			168	442	19.7	190	13.3	5.2	836	38.5	75.2	8.06	29.7	5.61	1.29	4.99	0.64	3.58	0.69	1.99	0.31
Aminov et al., 2017	KZ1-03	109		37.5082	74.5561					63.11	0.63	15.99	4.94		0.06	2.71	3.88	2.57	3.98	0.22	16.42		51.85	9.79	6.18	4.72		64.6			173	452	20.6	191	13.1	7.77	826	39.4	77	8.26	30.5	5.75	1.33	5.09	0.67	3.75	0.71	2.11	0.31
Aminov et al., 2017	SR001	109.3	1.9	37.5167	74.4144	0.70755	-6.17			64.63	0.59	15.61	4.45		0.07	2.01	3.64	2.89	3.71	0.21	13.36		34.61	9.93	9.07	3.95		24.8			175	494	22.7	195	14.2	2.23	864	53.1	103.3	10.94	39.5	7.3	1.44	6.45	0.78	4.15	0.78	2.18	0.35
Aminov et al., 2017	TR78	102		37.4451	74.6558					63.22	0.66	16.03	5.07		0.09	2.43	4.47	2.66	3.79	0.22	16.06		53.24	10.08	5.26	6.42		67.1			164	487	20.8	215	14	5.22	833	38.6	75.5	8.18	30.1	5.84	1.31	5.24	0.67	3.72	0.72	2.1	0.32
Aminov et al., 2017	TR80	102		37.4386	74.6398					62.74	0.66	16.14	5.05		0.09	2.37	4.42	2.62	3.87	0.22	16.31		47.3	10.07	4.46	5.79		68.8			174	484	21.1	207	14	6.28	842	39.3	77.9	8.37	30.8	5.93	1.3	5.32	0.68	3.77	0.72	2.11	0.32
Aminov et al., 2017	TR82	102		37.4758	74.5937					63.69	0.65	16.33	4.93		0.09	2.32	4.38	2.78	3.69	0.22	15.55		46.37	9.58	4.28	5.5		61.1			153	488	22.1	223	14.3	5.14	822	39.5	77.8	8.5	31.5	6.03	1.33	5.54	0.71	3.93	0.75	2.23	0.34
Aminov et al., 2017	TR83	104	1.6	37.4715	74.5884	0.707968	-7.88			62.56	0.69	16.46	5.08		0.09	2.35	4.46	2.75	3.75	0.22	16.02		55.1	9.83	4.98	6.34		66.2			157	473	22.4	203	14.5	5.94	846	38.7	77.1	8.48	32	6.17	1.33	5.61	0.73	4.03	0.78	2.25	0.35
Aminov et al., 2017	TR84	93.1	2.6	37.4422	74.5968	0.708167	-8.32			64.87	0.64	16.38	4.78		0.09	2.19	4.38	2.79	3.9	0.21	13.6		38.39	8.79	4.1	5.27		59.4			149	465	20.5	197	13.4	5.22	841	36.6	72	7.79	29.1	5.51	1.26	5.03	0.66	3.64	0.71	2.07	0.32
Aminov et al., 2017	TR85	96.5	1.9	37.4429	74.5865	0.708184	-8.26			63.76	0.62	16.25	4.73		0.09	2.17	4.33	2.67	3.55	0.21	14.54		45.27	8.85	4.24	2.57		59.5			136	481	20.9	203	13.5	2.82	761	38	74.6	8.12	30.1	5.71	1.29	5.26	0.68	3.73	0.72	2.08	0.32
Aminov et al., 2017	BK 10.1	107		37.4293	74.7917					65.18	0.5	15.25	3.84		0.07	1.54	2.87	3.21	3.33	0.12
Aminov et al., 2017	BK 10.2	107		37.4316	74.7715					63.1	0.62	15.66	4.78		0.07	1.91	3.38	3.28	3.14	0.14
Aminov et al., 2017	BK 10.3	107		37.4272	74.7556					62.93	0.6	15.62	4.94		0.07	1.76	3.71	3.21	3.06	0.14
Aminov et al., 2017	BK 3.2	95		37.3294	75.0521					68.71	0.3	14.73	3.3		0.04	0.28	0.95	3.75	5.81	0.1
Aminov et al., 2017	BK 4.1	92		37.3265	75.0387					59.9	0.75	14.14	6.08		0.11	3.77	4.46	2.78	4.71	0.46
Aminov et al., 2017	BK 4.2	94		37.3218	75.0378					66.78	0.43	15.21	3.73		0.04	1.02	1.29	3.29	6.55	0.17	7.55		9.01	9.73	2.55	23.94		30.3			248	460	22.6	362	19.4	3.33	1495	38.6	74.6	8.15	34.1	6.14	1.35	6.41	0.65	3.82	0.7	2.22	0.33
Aminov et al., 2017	BK 4.4	99		37.3186	75.0176					61.93	0.64	14.7	5.06		0.08	3	3.83	3.28	5.06	0.4
Aminov et al., 2017	BK 4.5	99		37.3186	75.0176					60.94	0.63	14.11	5.42		0.09	3.17	4.06	2.36	5.15	0.4
Aminov et al., 2017	BK 4.6	104		37.3186	75.0176					64.88	0.58	15.54	4.68		0.04	2.03	3.07	3.19	3.73	0.19
Aminov et al., 2017	BK 5.2	99		37.3512	74.9945					61.63	0.62	14.56	4.97		0.06	3.35	4.72	2.9	4.51	0.51
Aminov et al., 2017	BK 5.3	104		37.3414	74.9978					64.14	0.59	15.65	4.56		0.04	2.41	3.25	2.14	4.85	0.21
Aminov et al., 2017	BK 6.6	104		37.3315	74.9491					62.85	0.68	15.97	5.17		0.1	2.72	3.7	3.11	3.76	0.25
Aminov et al., 2017	BK 6.7	104		37.3255	74.9492					63.95	0.62	15.55	4.87		0.09	2.37	4.26	2.73	3.91	0.2
Aminov et al., 2017	BK 8.1	94		37.3827	74.861					61.89	0.6	14.92	5.35		0.08	2.93	2.58	3.33	5.07	0.35	13.68		44.4	8.94	7.18	11.83		46.3			189	352	18.7	202	11.5	3.95	1228	48	107.2	9.84	41.1	7.19	1.5	7.33	0.65	3.78	0.64	2.02	0.27
Aminov et al., 2017	BK 8.2	99		37.3752	74.8561					63.02	0.62	15.44	5.1		0.1	2.57	2.72	3.2	4.19	0.21
Aminov et al., 2017	BK 8.3	103		37.367	74.854					60.72	0.69	13.97	5.84		0.11	3.73	4.64	2.43	5.12	0.45
Aminov et al., 2017	BK 9.1	99		37.4156	74.8316					61.78	0.68	16.23	5.39		0.11	3.14	2.37	3.67	4.41	0.23
Aminov et al., 2017	BK 9.2	92		37.4141	74.8034					64.24	0.56	14.68	4.02		0.04	1.65	2.82	2.7	5.39	0.2
Aminov et al., 2017	BK 9.4	104		37.42	74.8023					63.41	0.65	15.99	4.98		0.07	2.33	4.33	2.53	3.57	0.21
Aminov et al., 2017	BK5.5	97		37.327	74.9876					56.21	0.93	15.42	7.78		0.13	5.5	6.99	2.14	3.43	0.3	31.34		226	24.25	13.4	25.31		107			113	807	33.46	190	16.2	11.15	1202	43.85	87.75	10.26	40.94	8.34	2.3	8.77	1.21	6.46	1.23	3.48	0.49
Aminov et al., 2017	TR79	102		37.4417	74.6474					63.12	0.68	16.09	5.24		0.09	2.42	4.41	2.64	3.91	0.22	15.01		47.34	9.82	4.71	5.13		65.9			165	457	20.5	226	14.3	6.11	844	35	70.9	7.57	28.7	5.51	1.24	4.93	0.65	3.66	0.71	2.09	0.33
Aminov et al., 2017	TR81	102		37.4367	74.6305					62.46	0.66	16.15	5.19		0.09	2.53	4.59	2.7	3.71	0.22	16.84		52.4	10.26	4.78	5.79		66.5			165	488	20.9	200	13.7	6.41	795	38.1	75	8.05	29.9	5.66	1.3	5.11	0.67	3.8	0.72	2.11	0.32
Aoya (2005)	Cuobu granite	17	1	28.9621	85.3441
Aoya (2005)	Malashan granite	17.8	1.1	28.9795	85.4424
Arnaud et al., 1992		5.2	1	35.63	79.52
Arnaud et al., 1992	K89G185	5.6	0.3	35.2	79.5	0.70807	-5.93			51.42	1.85	14.62	3.35	3.02	0.14	4.03	7.59	4.6	4.77		10		88	24	71.9			111.9	21.6		122	2011	31.6	411.8	31.2	2	2563	176.7	333		142	20.2	4.3		1.3
Arnaud et al., 1992	K896186	5.2		35.2	79.5	0.70805	-5.22			49.8	1.77	13.65	3.27	2.94	0.12	5.6	7.2	3.8	4.7	1.25	13	127	122	31	64			97.7	17.4		177.8	1756	17	358		0	2564	183	358	37.4	141	20	4.72	12		6.32		2.71
Arnaud et al., 1992	K89G189	5.1	0.1	35.2	79.5	0.70802	-4.8			82.2	1.79	14.6	3.29	2.96	0.12	4.21	7.56	3.79	4.69		10			13								1748					2350
Arnaud et al., 1992	K89G190	5.3	0.1	35.2	79.5	0.70817	-5.58			56.05	1.33	13.77	2.83	2.55	0.1	4.4	6.59	3.69	4.35		10			23								1358					1765
Arnaud et al., 1992	K89G191	5.2		35.2	79.5	0.70815	-5.83			56.95	1.36	14.1	2.86	2.57	0.1	3.8	6.45	3.89	4.75	0.99	13	95	137	30	70			84.6	20.3		119.5	1410	21	230		0	2080	137	263	27.3	96.3	13	2.99	8.27		4.51		2.1
Arnaud et al., 1992	K89G192	5.2		35.2	79.5	0.70812	-5.46			57.5	1.32	14.15	2.82	2.54	0.09	3.36	5.85	4.1	5.15	0.97	12	97	109	35	59			101.8	20.9		187.6	1397	24	318		14.4	2091	156	290	29.12	105	15	3.24	9.24		4.9		2.35
Arnaud et al., 1992	K89G193	5.2		35.2	79.5	0.70812	-5.99			57	1.31	14.31	2.81	2.53	0.09	3.67	6.74	4.06	4.09		8.3		81	18	57.5			79.2	21.6		193	1368	23	368.1	35.7	3.7	1760	150.9	274		106	13.6	3		0.9
Arnaud et al., 1992	K89G197	6.4	0.1	35.2	79.5	0.7137	-5.55			75.1	0.1	12.98	1.6	1.44	0.01	0.04	0.6	4.35	4.9	0.04	3	3	9	22	0			29.4	29.4		1139.1	64	9	27		128.9	86	78.9	103	6.83	15.3	1.69	0.21	1		0.96		1
Arnaud et al., 1992	K89G200	3.6	0.07	35.2	79.5	0.70817	-6.3			56.67	1.43	13.8	2.93	2.64	0	4	6	4	5.4		9.1		83	20	60.9			96.5			198	1587	23.4	407.2	26	6	2076	160.9	287		119	16.1	3.6		1
Bian et al., 2017	ZN1	115.8	0.6	32.2172	80.431
Bian et al., 2017	ZN21	113.7	0.5	32.2175	80.432
Bouilhol et al., 2011	D101	103.81	0.58	35.0292	73.7505	0.704161	5.84	15.15		64.01		20.77	0.303		0.01	0.13	5.61	7.15	0.02	0.01	3.7	0	5.2	3.6	3.9	17.1		2.8	17.9		0.143	126	0.718	3.01	0.018	0.037	17.95	0.621	1.398	0.169	0.79	0.167	0.23	0.146	0.02	0.128	0.028	0.077	0.013
Bouilhol et al., 2011	G12	104.38	0.78	35.0347	73.7426	0.703744	5.34	15.65		63.63		19.3	1.15		0.02	0.69	3.66	9.66	0.04	0.01	0.1	12.5	3.9	4.3	19.1	22.4		23.3	2.1		0.21	41	1.14	2.07	0.062	0.09	9.65	0.329	0.73	0.097	0.494	0.12	0.765	0.163	0.028	0.193	0.042	0.12	0.019
Bouilhol et al., 2011	G13	98.84	0.65	35.0201	73.7389	0.704336	6.48	15.2		75.8		13.07	0.93		0.04	0.37	2.94	4.72	0.02	0.02	5	8.3	3.3	3.8	2.8	117.5		10.3	13.4		0.101	58	2.95	46.9	0.29	0.065	15.88	0.892	2.083	0.276	1.33	0.3	0.646	0.283	0.052	0.395	0.095	0.343	0.063
Bouilhol et al., 2011	K08-18	93.58	0.07	35.1847	73.9743			13.2		62.21		16.27	6.01		0.12	2.2	6.4	3.26	0.79	0.17	13.3	110.7	9.1	16.3	13.8	13.5		76.2	18.6		17.41	417	16.16	142.9	2.26	0.738	251.6	10.7	26.4	3.47	15.48	3.39	0.55	3.03	0.51	2.79	0.594	1.92	0.249
Bouilhol et al., 2011	P63	98.91	0.29	35.0681	73.763	0.705032	5.35	14.95		79.51		12.13	0.175		0.005	0.05	3.63	3.47	0.02	0.01	3.1	4	9.4	2	0.6	5		4	10.6		0.219	147	0.465	0.433	0.04	0.222	10.85	0.209	0.365	0.037	0.177	0.063		0.058	0.01	0.076	0.017	0.046	0.01
Bouilhol et al., 2011	P8	104.77	0.13	35.017	73.7026	0.704426	7.21	15.9		62.64		20.11	1.32		0.06	1.45	4.13	9.06	0.05	0.02	3.9	3.06	5.95	4.09	7.68	3.41		40.4	12.4		2.07	199	9.74	3.42	0.308	2.39	72.23	0.551	1.636	0.293	1.91	0.815	0.509	1.39	0.257	1.83	0.391	1.09	0.162
Bouilhol et al., 2013	01B-22	39.9	1.4	35.4858	71.7914	0.705017	1.5
Bouilhol et al., 2013	01b-24	40.9	1.1	35.4069	71.7669	0.704022	5.7	11.7
Bouilhol et al., 2013	KO8-13	50.4	1.6	35.7455	73.6683	0.705862	-3.6
Bouilhol et al., 2013	KO8-3	76.9	2.1	35.6133	73.486	0.704311	1.2	6.2
Bouilhol et al., 2013	KO8-4	31.7	0.8	35.7906	73.3926	0.705952	-2.5
Bouilhol et al., 2013	LB08-12	58.4	1.1	34.5762	76.1246	0.704382	2.6	10.4
Bouilhol et al., 2013	LB08-23	48.1	1.1	34.5528	76.6044	0.71034	-6.4	4.1
Bouilhol et al., 2013	LB08-25	50.3	2.1	34.0875	77.6104	0.704221	1.5	9.3
Bouilhol et al., 2013	LB08-31a	59.5	1.9	34.2787	77.6046	0.703781	2.5	9.1
Bouilhol et al., 2013	LB08-7	58.1	1.8	34.2082	77.428	0.704127	2.5	8.6
Bouilhol et al., 2013	LB09-11.4A	39.8	0.7	33.5264	78.1516	0.708912	-6
Bouilhol et al., 2013	LB09-11.5A	29.6	0.8	33.5519	78.1477	0.71317	-9.7
Bouilhol et al., 2013	LB09-16.6A	60.9	1.6	34.035	77.921	0.704161	2.6	8.5
Bouilhol et al., 2013	LB09-16.7	51.5	2.2	34.073	77.9456	0.704263	2.2	9
Bouilhol et al., 2013	LB09-21.3A	98.6	2.6	34.5973	76.0255	0.703871	3.9	9.6
Bouilhol et al., 2013	LB09-22.7	72	1.5	34.5349	76.4925	0.704347	2.5	9.1
Bouilhol et al., 2013	LB09-23.11A	62.7	1.4	34.4232	76.7382	0.704189	2.9	10
Bouilhol et al., 2013	LB09-24.5	51.5	1.6	34.3056	77.1244	0.704523	1.4	9.6
Bouilhol et al., 2013	LB09-30	53.3	1.3	34.3992	76.9998	0.704233	2.8	9.1
Bouilhol et al., 2013	LB09-33	66	2.2	34.4978	76.9952	0.704288	1.7	9.4
Bouilhol et al., 2013	LB09-48	53.4	1.9	34.0278	77.7063	0.70425	2.2	8.9
Bouilhol et al., 2013	LB09-5.2B	61.8	1.1	33.9528	77.8004	0.704719	2.3	8.5
Bouilhol et al., 2013	LB11-O10	21.5	1.2	34.8183	76.807	0.709701	-7
Bouilhol et al., 2013	LB11-O16	25.1	1.3	34.838	76.8858	0.707422	-6.4
Bouilhol et al., 2013	LB11-S36	68.5	1.5	34.6252	77.3939	0.703582	2.6	9.2
Bouilhol et al., 2013	O1A-7	37.2	1.1	35.4753	71.7975	0.704526	1.7
Bouilhol et al., 2013	Pba-15	72	3	36.1161	73.3226	0.70395	3.1	9
Bouilhol et al., 2013	Pba-4	61.3	1.6	36.0326	73.408	0.704204	3.4	10.7
Bouilhol et al., 2013	PGAK-13.1	47.8	1.5	36.2183	73.7157	0.704251	2.9	11.3
Bouilhol et al., 2013	PGAK-18.5	51.5	2.7	36.2161	73.7181	0.704344	3.5	11.8
Bouilhol et al., 2013	PGAK-26	72.1	1.4	36.1567	73.7356	0.704507	1.8	9.2
Bouilhol et al., 2013	PGLT-19	64.8	3.9	36.047	74.1408	0.703855	4.8	9.9
Bouilhol et al., 2013	PGUP-15	58.8	1.4	36.1212	73.3071	0.704139	3.5	9.4
Bouilhol et al., 2013	PGUP-16	83.5	2.8	36.1921	73.2454	0.703654	5.1	13.2
Bouilhol et al., 2013	PGUP-9	58.9	1.4	36.1646	73.1638	0.704105	4.7	10.8
Bouilhol et al., 2013	PJA-4	30.1	1.3	35.7183	74.6276	0.704959	1
Bouilhol et al., 2013	PK05-16	41.5	1	35.0826	75.0784			3.9
Bouilhol et al., 2013	PK05-20	42.1	0.9	35.0165	75.4216			4
Bouilhol et al., 2013	PK05-39	86	2.6	35.5919	75.3194	0.703811	5.4	14
Bouilhol et al., 2013	PK06-11	102.1	2.1	34.9717	75.1013	0.703744	5	12.1
Bouilhol et al., 2013	PK06-36	46.3	1.3	35.1742	75.6194	0.705061	1.2	6.8
Burchfiel et al., 1989	2MGR	10	0.1	36.47	87.48
Burchfiel et al., 1989	MV-2	4	0.1	36.47	87.48
Burchfiel et al., 1989	MV-2	4	0.1	36.47	87.48
Burchfiel et al., 1989	MV1B	4	0.1	36.47	87.48
Burchfiel et al., 1989	MV1B	4	0.1	36.47	87.48
Burchfiel et al., 1989	QTD	8.4	0.1	36.47	87.48
Burchfiel et al., 1989	UMBTG	10.5	0.1	36.47	87.48
Cai et al., 2017	P131	20.5	0.3	38.3509	75.0593
Cai et al., 2017	P9127	20.1	0.6	37.9648	75.2687
Cao et al., 2016	11B-33	152.1	1.3	32.5596	80.1842			-7.87		60.06	0.62	15.7	6.731		0.11	5.18	3.7	2.95	0.96	0.11	26.7	178	121	20.1	29.1	24.7		77.9	15.9		51	210	22.5	17.3	8.93	4.1	592	17.3	35.9	4.69	19.3	4.13	0.863	3.73	0.758	4.34	0.817	2.54	0.418
Cao et al., 2016	11B-34	156.3	1.8	32.5521	80.1859			-14.15		60.82	0.59	15.32	6.43042		0.1	4.05	5.59	2.24	2.56	0.11	24.7	159	87.1	17.8	15.4	12.2		64.2	15.5		113	183	23.4	40.4	8.62	3.14	280	34.4	62.7	6.9	25.2	4.6	0.97	4.33	0.757	4.57	0.804	2.54	0.395
Cao et al., 2016	11B-35	155		32.5528	80.2084					63.11	0.55	14.17	6.11085		0.11	4.22	4.71	2.1	2.5	0.09	23.7	147	170	18.6	25.9	15.7		71.1	16.2		110	164	23.6	18.5	9.36	5.01	424	24.1	49.9	5.83	23.1	4.89	0.895	4.43	0.788	4.78	0.839	2.49	0.415
Cao et al., 2016	11B-36	155		32.5415	80.2404					61.99	0.53	15.5	5.7262		0.1	3.15	5.71	2.19	2.87	0.1	19.1	130	53	15	12.3	15		64.6	16.3		120	236	22.2	57.9	9.33	4.45	498	35.8	64.5	6.76	25	4.56	1.01	4.24	0.738	4.35	0.782	2.33	0.39
Cao et al., 2016	11B-37	159.4	1.6	32.5411	80.2905			-14.75		60.71	0.58	15.29	6.47809		0.12	4.33	6.16	1.93	2.22	0.11	23.4	154	157	17.6	23.8	13.4		67.9	16.5		116	200	23.7	18.5	8.94	4.46	416	27.1	53	5.86	23	4.34	0.992	4.3	0.727	4.47	0.828	2.56	0.398
Cao et al., 2016	11B-38	149.3	1.6	32.551	80.4036			-11.8632		58.77	0.66	16.26	7.63944		0.15	3.63	6.82	2.15	1.92	0.13	23.9	176	36.4	16.6	7.87	10.1		80.3	17.7		86.3	250	27.4	23	8.83	3.82	291	28	57.9	6.36	25.8	4.83	1.03	4.59	0.862	4.99	0.896	2.86	0.454
Cao et al., 2016	11B-39	155		32.5399	80.4507					62.3	0.52	15.75	6.09185		0.12	3.08	5.86	2.23	2.39	0.11	19.4	147	40	15.3	8.84	12.8		69	16.2		113	247	22	14.5	8.39	4.78	291	34	61.3	6.5	23.9	4.33	0.974	4.06	0.734	4.24	0.742	2.31	0.339
Cao et al., 2016	11B-40	155		32.5382	80.5228					66.08	0.4	15.31	3.89719		0.07	1.78	3.76	1.87	5.39	0.1	11.8	95.6	17.1	9.47	5.47	5.64		53.4	12.8		155	344	15.3	9.01	5.81	3.25	1511	14.5	27.4	3.23	14.1	3.09	1.04	2.91	0.512	2.91	0.561	1.58	0.274
Cao et al., 2016	11B-41	155		32.5077	80.8356					66.35	0.56	15.9	3.53234		0.05	2.13	4.11	4.39	1.68	0.17	8.03	77.3	41.2	10.9	27.3	18.8		45.3	15.4		66.3	406	9.87	42.4	10.3	6.16	315	16.4	30.9	3.7	14.1	2.66	0.76	2.26	0.371	2.25	0.379	0.91	0.14
Cao et al., 2016	11B-45	155		32.3501	80.5247					77.88	0.11	12.11	1.18247		0.02	0.14	0.42	2.5	4.42	0.04	3.29	8.88	6.79	0.616	1.83	2.76		32.2	12.9		171	43.3	27.9	95.4	14.9	4.79	257	29.3	54.7	6.25	21.8	4.08	0.401	4.14	0.785	4.45	0.868	2.87	0.467
Cao et al., 2016	11B-49	163.6	1.9	32.3872	80.5734			-14.615		62.6	0.52	14.69	5.9485		0.11	4.31	5.67	2.08	2.44	0.1	22.4	153	170	18.6	32.9	12.9		64	15.5		103	173	21.9	45.7	8.71	4.9	391	29	55.3	6.12	23	4.44	1.03	4.4	0.712	3.88	0.838	2.27	0.394
Cao et al., 2016	11B-50	154.5	1.7	32.3895	80.642			-13.5789		59.01	0.61	15.14	7.31443		0.14	5.07	7	1.87	1.75	0.11	26.6	173	139	21.5	22.1	21.4		77.7	15.5		70.5	195	23.6	27.8	7.64	2.58	280	23.8	46	5.36	21	3.95	1.05	4.22	0.695	4.01	0.732	2.41	0.369
Cao et al., 2016	11B-51	150	2.3	32.3761	80.7098			-13.8385		60.92	0.57	14.82	6.37305		0.12	4.29	5.51	1.99	2.95	0.1	22	146	121	17.1	23.4	12.4		61.9	15.7		129	268	22.8	64.2	8.81	5.9	540	26.4	51.8	5.99	22.8	4.52	1.02	4.12	0.71	4.3	0.826	2.54	0.429
Cao et al., 2016	11B-52	155		32.3594	80.751					74.29	0.25	13.68	1.79476		0.07	0.45	0.44	3.43	4.54	0.05	4.5	27.7	7.75	2.07	0.812	2.96		35.9	14.3		185	136	28.9	93.5	11.9	4.66	714	37.6	82.4	7.57	25.5	4.24	0.986	3.96	0.761	4.55	1.02	3.01	0.494
Cao et al., 2016	11B-53	155	1.6	32.5543	80.9505			-11.4421		61.97	0.54	16.08	6.10331		0.12	2.96	5.88	2.21	2.64	0.1	19.4	144	26.1	14.4	5.86	6.83		63.1	16.5		111	237	21.6	22.9	8.68	10.2	377	23.5	47.8	5.23	19.8	3.88	1.02	3.75	0.699	4.12	0.771	2.31	0.378
Cao et al., 2016	11B-54	155		32.5553	80.954					61.93	0.55	15.96	6.54393		0.13	3.05	6.1	2.23	2.13	0.11	19.6	149	27.8	15.9	7.2	6.67		65.2	17.3		99.1	246	22.9	25.6	9	7.78	266	19.8	41.3	4.86	19.3	4.12	0.976	3.9	0.715	4.16	0.826	2.43	0.387
Cao et al., 2016	11B-55	155		32.5233	80.9235					68.44	0.5	15.1	3.56176		0.06	1.65	3.4	3.62	3.1	0.15	6.93	61.7	22.5	9.13	13.7	30.4		38.2	14.8		95.9	308	13.6	63.8	14.5	7.23	347	30	51.2	5.45	19.6	3.26	0.938	2.79	0.475	2.53	0.476	1.53	0.212
Cao et al., 2016	11B-56	155.3	1.7	32.4215	81.4513			-11.0667		62.85	0.51	15.64	5.80056		0.11	2.8	5.47	2.38	2.37	0.11	18.1	138	29.4	13.3	6.11	9.25		63	15.8		102	240	22	42.7	9.25	3.01	341	19.5	40.6	4.99	19.4	4.27	1.05	3.62	0.739	4.24	0.818	2.33	0.378
Cao et al., 2016	11B-57	155		32.4215	81.4513					62.95	0.54	15.81	6.00911		0.11	2.93	5.22	2.11	2.11	0.1	18.7	150	29.5	13.6	6.5	7.28		62.6	16.3		120	243	22.1	16.1	9.28	4.27	282	21	40.6	4.79	18.6	4	0.982	3.7	0.724	3.83	0.791	2.3	0.373
Cao et al., 2016	11B-57-1	155		32.4215	81.4513					56.67	0.54	13.69	7.871		0.23	7.02	6.39	2.47	2.66	0.16	26.2	165	237	25.4	91.1	21.4		94.7	14.8		104	209	38.5	55.7	8.34	2.88	245	13.8	42.8	6.66	30.2	7.35	1.66	6.47	1.26	7.04	1.38	4.01	0.628
Cao et al., 2016	11B-59	155		32.421	80.5022					63.17	0.55	15.32	6.24414		0.11	2.96	5.61	2.24	2.59	0.12	18.6	141	24.8	14.1	6.78	15.2		59	15		105	225	22.4	18.8	8.81	2.1	328	18.6	39.4	4.67	18.9	3.94	0.915	3.63	0.71	4.09	0.79	2.3	0.396
Cao et al., 2016	11B-60	156.4	1.7	32.409	81.5367			-10.8737		64.6	0.47	15.17	5.40877		0.11	2.57	5.18	2.04	2.85	0.09	15.7	115	18.5	11.2	5.54	5.57		51.4	13.8		88.9	224	18.9	20.1	7.65	1.6	367	23.1	44.9	4.91	18.1	3.3	0.894	3.36	0.569	3.3	0.713	2.23	0.338
Cao et al., 2016	11B-62	155.6	1.6	32.5553	81.2216			-11.5211		62.8	0.55	15.82	6.10414		0.12	3.05	5.55	2.42	2.33	0.11	16.4	121	19.2	11.9	6.67	6.93		59.1	14.3		99.3	205	20.4	21.9	8.36	3.39	256	9.35	22.7	3.2	14	3.07	0.786	3.42	0.695	3.44	0.724	2.27	0.367
Cao et al., 2016	11BH-102	141.6	1.4	31.8578	84.0417			-7.88421		72.2	0.39	13.6	2.90668		0.07	0.89	1.75	3.21	3.62	0.09	8.01	55.3	8.25	5.1	2.13	5.71		44.7	14.1		146	223	26	74.8	11.1	7.13	614	38.1	70.4	7.93	26.9	4.45	0.982	4.27	0.762	4.53	0.913	2.69	0.455
Cao et al., 2016	11BH-103	135		31.8519	84.0082					62.18	0.64	15.26	6.26729		0.12	2.7	5.75	2.5	2.74	0.12	19.2	146	22	16.4	7.79	6.56		71.1	16.7		123	243	33	49.9	10	15.9	392	33.2	64.7	7.57	27.7	5.25	1.11	5.13	0.98	5.56	1.2	3.48	0.537
Cao et al., 2016	11BH-104	136.9	1.4	31.7887	83.9714			-5.02		65.24	0.45	15.16	4.72967		0.09	2.46	4.67	2.95	2.73	0.1	12.1	117	25.3	12.4	10.4	9.23		45.9	14.7		109	226	17.7	23.6	6.86	3.81	386	20.8	39.1	4.41	15.1	2.73	0.712	2.96	0.476	3.31	0.642	1.84	0.305
Cao et al., 2016	11BH-104-1	137.7	1.6	31.7887	83.9714			-4.64091		55.65	0.67	17.03	7.56115		0.17	4.51	6.11	4.02	2.11	0.13	18.6	189	26.9	23.3	21.3	48		75.3	16.7		105	318	21.1	36.4	5.2	7.44	278	17.2	36.2	4.49	17.1	3.47	0.999	3.62	0.696	3.72	0.773	2.43	0.319
Cao et al., 2016	11BH-105	135		31.7263	83.9556					64.03	0.5	15.63	5.17371		0.09	2.53	5.37	2.86	2.46	0.1	14.4	125	21.4	13.5	8.57	25.3		46.2	15.7		102	235	22.2	34.4	6.75	3.41	379	23.8	44.9	4.97	18.6	3.46	0.858	3.26	0.658	3.53	0.814	2.25	0.404
Cao et al., 2016	11BH-106	130.4	1.3	31.6855	83.9369			-4.27		68.41	0.37	14.89	3.50064		0.07	1.78	3.29	3.22	3.15	0.08	8.02	76.3	14.8	7.92	5.55	8.42		30.3	13.2		124	204	14.1	21.1	5.91	4.96	404	33.5	56.4	5.55	17.3	2.49	0.606	2.09	0.455	2.33	0.473	1.4	0.248
Cao et al., 2016	11BH-28	135		32.2203	81.2416					77.01	0.2	12.96	1.23236		0.04	0.19	0.61	2.59	4.63	0.04	4.46	17.2	5.89	1.03	0.722	2.07		23	14.1		169	78.7	30	98.3	11.3	3.03	661	42.7	79.3	8.75	30.5	5.03	0.809	4.79	0.912	5.46	1.02	3.28	0.587
Cao et al., 2016	11BH-29-1	135		32.2201	81.2415					77.25	0.14	12.59	1.04041		0.1	0.11	0.13	3.5	4.85	0.03	4.02	7.59	5.34	0.856	1.63	2.78		16.2	11.9		202	54.9	21.7	68.7	13.1	1.74	662	36.5	69.3	7.7	26.7	4.92	0.787	3.86	0.71	4.1	0.777	2.34	0.398
Cao et al., 2016	11BH-29-2	135		32.2201	81.2415					61.66	0.65	16.91	5.2801		0.11	2.39	5.62	3.63	2.61	0.23	10.7	109	10.5	14.3	8.77	30.1		83.6	20.1		100	742	16.2	71.7	8.41	3.86	551	43	79.8	9.83	35.5	5.74	1.52	4.42	0.675	3.43	0.619	1.66	0.28
Cao et al., 2016	11BH-30	135		32.2036	81.25					72.17	0.3	14.08	2.72776		0.06	0.95	3.06	3.18	2.68	0.07	7.56	42.2	6.4	5.14	2.39	2.44		29.5	12.9		93	146	15.2	57	5.46	2	428	27.9	49.5	5.1	17.7	3	0.767	2.59	0.473	2.91	0.566	1.49	0.305
Cao et al., 2016	11BH-31-1	130.5	1.2	32.1844	81.273			-1.36316		71.45	0.32	14.44	2.98024		0.06	0.97	3.21	3.3	2.71	0.08	7.66	51.6	8.04	5.67	2.86	3.65		35.5	15		130	195	17.8	62.4	6.66	4.72	450	29.4	50.8	5.35	19	3.02	0.816	2.73	0.474	2.78	0.549	1.94	0.364
Cao et al., 2016	11BH-31-2	141.1	1.5	32.1844	81.273			-1.34737		60.02	0.66	16.09	7.40107		0.26	3.06	5.88	3.97	1.16	0.12	23.3	153	17.7	13.9	5.44	22.5		71.4	16.6		81.6	171	39	43.3	7.42	5.44	197	12.1	26.5	3.68	16.2	4.68	0.982	4.73	1.01	6.78	1.38	4.54	0.821
Cao et al., 2016	11BH-32	135		32.126	81.2703					71.67	0.32	14.21	2.66607		0.09	0.98	2.4	3.33	3.22	0.08	7.66	39.1	5.8	4.24	1.89	2.86		44.8	14.5		144	169	29.6	88.3	12.9	4.33	395	30	56.9	6.05	22.4	4.36	0.928	4.35	0.852	4.95	1.05	3.53	0.609
Cao et al., 2016	11BH-35	149.7	1.6	32.069	82.0559			-6.11		77.97	0.12	12.18	0.661595		0.03	0.11	0.35	3.02	5.41	0.04	2.85	6.14	4.59	0.449	0.718	1.49		13	12.2		284	17.4	25.9	143	14	6.22	102	26.9	48.2	5.02	16.7	3.55	0.271	2.86	0.612	3.89	0.872	2.97	0.612
Cao et al., 2016	11BH-59	155		32.1073	83.0239					72.82	0.31	13.92	2.08441		0.05	0.73	2.04	2.84	4.57	0.07	5.65	41.8	7.36	3.53	2.15	2.16		26.2	14.2		215	171	17.8	83.5	10.6	14.1	596	35.6	65.1	6.7	23.5	3.44	0.827	3.14	0.507	3.08	0.597	1.6	0.251
Cao et al., 2016	11BH-60	149.4	1.5	32.092	83.0242			-11.5435		68.98	0.45	14.85	3.57175		0.07	1.3	2.88	2.77	4.21	0.09	10.7	71.1	10.5	6.13	2.73	3.24		35.5	16.9		199	185	40	104	16.4	9.68	364	44.9	85.1	9.1	33.5	5.96	0.955	5.53	1.01	6.53	1.29	4.06	0.677
Cao et al., 2017	11B-33	152.1		32.5596	80.1842					60.06			2.05	4.17
Cao et al., 2017	11B-34	156.3		32.5521	80.1859					60.82			1.8	4.12
Cao et al., 2017	11B-35			32.5528	80.2084					63.11			1.44	4.16
Cao et al., 2017	11B-36			32.5415	80.2404					61.99			1.48	3.77
Cao et al., 2017	11B-37	159.4		32.5411	80.2905					60.71			1.14	4.75
Cao et al., 2017	11B-38	149.3		32.551	80.4036					58.77			2.18	4.86
Cao et al., 2017	11B-39			32.5399	80.4507					62.3			2.25	3.42
Cao et al., 2017	11B-40			32.5381	80.5228					66.08			1.4	2.22
Cao et al., 2017	11B-41			32.5077	80.8356					66.35			1.48	1.83
Cao et al., 2017	11B-45			32.3501	80.5247					77.88			0.96	0.2
Cao et al., 2017	11B-49	163.6		32.3872	80.5734					62.6			1.5	3.96
Cao et al., 2017	11B-50	154.5		32.3895	80.642					59.01			1.4	5.26
Cao et al., 2017	11B-51	150		32.3761	80.7098					60.92			1.5	4.33
Cao et al., 2017	11B-52			32.3594	80.751					74.29			1.36	0.39
Cao et al., 2017	11B-53	155		32.5543	80.9505					61.97			2.13	3.54
Cao et al., 2017	11B-54			32.5553	80.954					61.93			2.51	3.59
Cao et al., 2017	11B-55			32.5233	80.9234					68.44			1.56	1.78
Cao et al., 2017	11B-56	155.3		32.4215	81.4513					62.85			2.08	3.31
Cao et al., 2017	11B-57			32.4215	81.4513					62.95			1.5	4.01
Cao et al., 2017	11B-57-1			32.4215	81.4513					56.67			2.27	4.98
Cao et al., 2017	11B-59			32.421	80.5022					63.17			2.19	3.61
Cao et al., 2017	11B-60	156.4		32.409	81.5367					64.6			1.85	3.17
Cao et al., 2017	11B-62	155.6		32.5553	81.2216					62.8			2.05	3.61
Cao et al., 2017	11BH-102	141.6		31.8578	84.0416					72.2			1.38	1.36
Cao et al., 2017	11BH-103			31.8519	84.0082					62.18			2.84	3.05
Cao et al., 2017	11BH-104	136.9		31.7886	83.9714					65.24			2.01	2.42
Cao et al., 2017	11BH-104-1	137.7		31.7886	83.9714					55.65			2.86	4.18
Cao et al., 2017	11BH-105			31.7263	83.9556					64.03			2.08	2.75
Cao et al., 2017	11BH-106	130.4		31.6855	83.9369					68.41			1.61	1.69
Cao et al., 2017	11BH-28			32.2203	81.2416					77.01			1.02	0.19
Cao et al., 2017	11BH-29-1			32.2201	81.2415					77.25			1	0.03
Cao et al., 2017	11BH-29-2			32.2201	81.2415					61.66			2.52	2.46
Cao et al., 2017	11BH-30			32.2036	81.25					72.17			1.1	1.45
Cao et al., 2017	11BH-31-1	130.5		32.1844	81.273					71.45			1.12	1.65
Cao et al., 2017	11BH-31-2	141.1		32.1844	81.273					60.02			2.71	4.17
Cao et al., 2017	11BH-32			32.126	81.2703					71.67			1.19	1.31
Cao et al., 2017	11BH-35	149.7		32.069	82.0559					77.97			0.52	0.13
Cao et al., 2017	11BH-59			32.1073	83.0239					72.82			0.76	1.18
Cao et al., 2017	11BH-60	149.4		32.092	83.0242					68.98			1.57	1.78
Cao et al., 2018	LGR-01-02	112.9	1.5	31.1328	83.8617	0.706389	-4.66	-0.0928571		67.71	0.52	15.04	2.54	1.77	0.01	1.5	4.08	3.28	2.58	0.14			6.95		2.12				18		85	236	26.91		6.66	13.7	410	26.7	53.7	6.16	23.3	4.68	1.14	3.9	0.7	4.57	0.94	2.89	0.44
Cao et al., 2018	LGR-01-03			31.1328	83.8617	0.706339	-4.94			67.16	0.54	15.03	2.48	2	0.03	1.57	4.06	3.22	2.63	0.15			7.88		2.1				17.7		93	220	30.7		7.62	12.5	388	26.8	54.7	6.74	26.4	5.42	1.13	4.58	0.82	5.24	1.09	3.29	0.51
Cao et al., 2018	LGR-01-04			31.1328	83.8617					66.61	0.59	15.39	2.05	2.33	0.01	1.77	4.21	3.86	2.21	0.16			9.37		2.94				18.3		50	257	23.02		6.92	16.5	316	22.3	42.9	5.46	21.1	4.39	1.08	3.68	0.65	4.16	0.85	2.54	0.39
Cao et al., 2018	LGR-01-05			31.1328	83.8617					67.93	0.49	15.15	2.28	1.85	0.06	1.49	4.01	3.07	2.28	0.13			6.36		2.04				18.1		73	347	24.3		6.86	9.1	396	20.6	40.6	4.84	18.8	4.06	1.1	3.56	0.64	4.24	0.89	2.66	0.42
Cao et al., 2018	LGR-01-06			31.1328	83.8617					66.86	0.55	15.2	2.44	2.17	0.02	1.62	4.16	3.16	2.67	0.15			7.12		4.21				18.6		93	225	30.05		7.42	17.5	366	25.6	52.6	6.12	23.4	4.91	1.12	4.15	0.76	5.04	1.05	3.19	0.51
Cao et al., 2018	LGR-06-02	112.6	1.3	31.1303	83.8597	0.707277	-6.53	1.23333		77.41	0.06	12.06	0.19	0.52	0.03	0.1	0.66	2.14	6.58	0.01			1		2.48				11.7		124	51	3.88		1	25.4	82	35	57.5	5.02	13.9	1.65	0.34	1.7	0.17	0.72	0.14	0.43	0.07
Cao et al., 2018	LGR-06-03			31.1303	83.8597	0.706312	-5.33			77.42	0.06	12.14	0.58	0.12	0.01	0.12	0.78	2.22	6.31	0.01			0.84		0.47				11.4		122	50	3.92		1.38	29.9	91	40.7	64.2	5.67	15.6	1.78	0.32	1.78	0.17	0.71	0.14	0.43	0.07
Cao et al., 2018	LGR-06-04			31.1303	83.8597					76.98	0.06	12.29	0.57	0.19	0.02	0.11	0.66	2.22	6.63	0.02			0.73		1.22				10.5		119	30	2.5		1.18	29.1	108	29.2	52.6	4.14	11.4	1.25	0.22	1.4	0.12	0.5	0.09	0.3	0.05
Cao et al., 2018	LGR-05-02	90.5	1.5	31.1461	83.8611	0.705784	-3.3	0.83125		59.74	0.82	16.96	2.94	3.6	0.04	3.04	5.93	2.92	2.66	0.26			39.2		14.8				21.9		107	450	22.11		10.2	14	368	33.8	67.4	8.08	30.8	5.93	1.36	4.49	0.71	4.14	0.79	2.31	0.34
Cao et al., 2018	LGR-05-03			31.1461	83.8611	0.705738	-4.19			59.81	0.82	16.99	2.86	3.65	0.08	3.07	5.94	2.94	2.61	0.25			40.8		14.9				21.9		98	435	21.5		10.35	11.8	358	31.1	63.6	7.62	29	5.7	1.3	4.36	0.68	3.98	0.76	2.24	0.33
Cao et al., 2018	LGR-05-04			31.1461	83.8611					59.49	0.84	17	3.46	3.18	0.04	3.06	5.83	2.94	2.69	0.26			40.7		15.6				22.3		111	451	21.9		10.2	12.5	384	33.8	66.8	8.16	31.1	5.91	1.37	4.54	0.71	4.08	0.78	2.28	0.34
Cao et al., 2018	LGR-05-05			31.1461	83.8611					59.75	0.83	17.03	3.29	3.29	0.05	3.06	5.92	2.98	2.61	0.26			31.9		16.6				21.9		101	460	22.2		9.96	13	368	34.4	67.8	8.14	30.9	5.94	1.37	4.56	0.72	4.12	0.79	2.27	0.34
Cao et al., 2018	LGR-05-06			31.1461	83.8611					59.77	0.82	17.06	2.98	3.57	0.04	3.06	6	3.01	2.56	0.26			39.4		13.7				21.3		95	431	21.17		9.62	10.3	357	32.9	64.2	7.88	30	5.75	1.32	4.34	0.68	3.96	0.75	2.19	0.32
Carosi et al., 2010	10--31	17.6	0.2	29.125	82.6167
Chang et al., 2011	GZ0912-1	124.2		32.7	84.37			9.495
Chang et al., 2011	GZ0913-1	125.45		32.7	84.37			8.20952
Chapman et al., 2018	14-73	198	7	38.2081	74.0284	0.7079	-5.6	-6.7
Chapman et al., 2018	14-60	109	5	38.1289	73.8556			-12.8		69.45	0.53	14.76	3.26		0.08	1.02	2.76	2.6	3.97	0.12
Chapman et al., 2018	14-87	105	3	37.4931	74.6111			-10.8		64.23	0.57	15.51	4.58		0.11	2.29	3.36	4.3	2.2	0.2
Chapman et al., 2018	14-89	104	3	37.784	73.9593			-5.1
Chapman et al., 2018	13P101	120	4	37.9027	73.7301
Chapman et al., 2018	14-37	74	2	37.75	71.5667			-1.7		59.64	0.91	17.03	7.1		0.11	2.77	4.08	3.22	3.86	0.16
Chapman et al., 2018	14-93	72	2	37.8735	71.629			1.3		58.29	0.91	17.88	6.03		0.09	1.72	4.97	3.62	4.58	0.26
Chapman et al., 2018	14-17	40.9	1.1	38.3618	71.4668			-3.1			0.24	14.9	1.13		0.01	0.4	1.44	7.51	0.68	0.08
Chapman et al., 2018	15-19	36.1	1.2	38.4839	73.6825	0.706178	-2.73293	1	7.6	59.54	0.49	19.9	3.8		0.04	1.02	3.25	5.86	4.63	0.18	6.93	147.44	1.21	3.31	1.12	2.08		34	63.1	0.92	278.65	1399.09	7.97	9.1	5.04	3.79	5860.8	30.66	36.06	3.9	13.31	2.12	2.62	2.04	0.24	1.23	0.25	0.7	0.1
Chapman et al., 2018	15-45	39.3	1.5	38.6107	71.9441	0.709871	-7.47166	-2.2	6	70.41	0.29	15.62	1.68		0.01	0.49	1.52	4.25	4.86	0.09	7.9	40.24	5.62	1.76	2.13	1.48		10.97	28.29	0.27	508.69	262.11	27.51	31.63	8.36	18.66	1329.54	32.13	88.05	9.85	32.82	6.58	1.09	5.95	0.79	3.93	0.72	1.91	0.26
Chapman et al., 2018	15-46	39.8	1	38.559	71.8607	0.705151	-1.68776	0.5	6.7	54.1	1.14	20.43	6.41		0.04	2.11	4.04	6.26	2.5	0.6	5.73	125.7	1.32	8.99	1.85	4.22		28.05	46.8	0.86	176.94	1743.26	22.82	32.27	16.33	9.82	2964.46	96.43	230.19	11.02	68.17	8.55	3.29	8.36	0.81	3.42	0.61	1.69	0.19
Chapman et al., 2018	15-47	40.6	1	38.5602	71.8557	0.708141	-4.78578	-2.7	7.6	74.65	0.17	13.57	0.66		0.02	0.18	1.06	6.13	1.22	0.05	2.77	25.01	1.2	0.63	2.02	18.71		2.44	12.03	0.11	176.93	72.88	5.93	12.55	8.04	2.08	378.59	15.94	21.23	1.11	8.9	1.65	0.45	1.45	0.19	0.95	0.18	0.49	0.07
Chapman et al., 2018	14-19	20.3	1.3	38.0854	71.3219			-4.6		72.65	0.17	14.02	1.83		0.02	0.29	1.5	3.63	4.49	0.02
Chapman et al., 2018	15-07	17.7	1	38.4515	72.7031	0.708223	-5.81648	-7.3		73.79	0.14	13.98	1.45		0.04	0.16	1.05	3.98	4.71	0.02	6.95	15.7	0.58	0.71	0.49	3.77		50.95	43.26	0.41	695.74	358.32	44.23	78.9	13.81	37.1	1812.98	78.8	191.21	9.16	53.94	8.06	1.55	7.79	0.9	4.49	0.9	2.72	0.41
Chen et al., 2010	CM1-04-01	21.3	1	30.4681	86.0314	0.712626	-11.1			63.96	1.14	15.65	4.81		0.05	1.75	1.59	2.92	7.32	0.04	7.72	97.1	33.1		6.84						652	981	14.4	511	32	40.6	2157	41.3	93.2	53.7	57.9	11.2	2.63		0.8	3.14	0.54	1.36	0.19
Chen et al., 2010	CM1-04-02	21.3	1	30.4681	86.0314					65.03	1.12	14.35	4.72		0.06	1.67	1.38	2.96	7.03	0.08	7.06	88.4	32.2		5.94						600	898	16.3	498	30	49.5	1849	55.2	130.3	40.7	76.2	14.4	2.46		0.91	3.68	0.6	1.58	0.2
Chen et al., 2010	CM1-04-03	21.3	1	30.4678	86.0325	0.712245	-10.87			62.51	1.06	14.89	5.02		0.09	1.9	3.61	2.97	7.24	0.31	7.85	91.4	27.3		8.31						667	1280	19.1	520	31.8	58.6	1717	71.5	157.5	76.9	97.1	17.8	3.25		1.09	4.43	0.69	1.87	0.23
Chen et al., 2010	CM1-04-04	21.3	1	30.4678	86.0331					63.05	1.17	15.33	5.01		0.05	1.58	1.45	3.32	7.06	0.19	6.4	112	30.7		7.27						611	1071	12.3	486	29.5	58.3	1708	41.4	81.1	71.5	41.4	7.3	1.78		0.6	2.59	0.48	1.29	0.18
Chen et al., 2010	CM1-04-05	21.3	1	30.4761	86.0522	0.712719	-10.96			60.4	1.29	14.91	5.34		0.08	2.47	3.84	2.86	7.27	0.3	11.48	105	33.3		6.66						654	1248	20.4	551	31.8	48.2	2015	69	155.2	65.9	102.4	20.3	3.73		1.23	4.9	0.78	1.96	0.26
Chen et al., 2010	CM1-04-07	21.3	1	30.4811	86.0558	0.713389	-12.52			58.6	1.24	14.97	5.74		0.07	2.34	2.22	2.1	10.35	0.15	8.27	123	61.8		27.71						1045	1349	24.9	1287	56.8	74.5	2383	54.5	117.8	72	73.3	16.7	2.9		1.19	5.05	0.83	2.16	0.32
Chen et al., 2010	CM1-04-08	21.3	1	30.4811	86.0558					62.84	1.15	14.83	4.98		0.07	1.94	2.44	2.86	7.26	0.14
Chen et al., 2010	CM1-04-09	21.3	1	30.4811	86.0558	0.71258	-10.95			61.93	1.36	15.22	4.9		0.05	1.58	2.18	2.85	7.46	0.17	7.77	123	41.3		5.55						554	1099	20.5	571	34.8	19.6	2012	59.3	135.8	75.3	88.3	18.4	3.43		1.19	4.73	0.75	1.93	0.24
Chen et al., 2010	CM1-04-10	21.3	1	30.4811	86.0558	0.712485	-11.16			61.24	1.25	15.1	5.13		0.06	1.78	2.76	2.78	7.44	0.31	6.37	102	28.6		5.71						646	1212	19.6	514	30.4	48.7	1901	65.8	147.6	68	95.5	18.6	3.34		1.11	4.56	0.73	1.78	0.23
Chen et al., 2010	CM1-04-11	21.3	1	30.4833	86.0567	0.713617	-12.3			58.48	1.52	14.99	6.01		0.09	2.78	2.3	1.93	10.59	0.06	10.14	147	77.2		35.35						1109	1681	24	1196	60.8	79.5	2927	44.9	122	62.1	91.2	20.3	3.48		1.33	5.08	0.86	2.19	0.3
Chen et al., 2010	CM1-04-12	21.3	1	30.4958	86.0708	0.711636	-11.27			61.26	1.32	13.6	4.98		0.11	2.73	3.85	2.39	7.94	0.18	9.87	114	40.7		12.32						692	1506	13.8	512	29.7	21.9	2015	43.8	107.6	62.6	71.1	14.5	2.91		0.87	3.52	0.55	1.42	0.17
Chen et al., 2010	CM1-04-13	21.3	0.15	30.4958	86.0708	0.713817	-11.25			72.15	0.93	9.55	4.61		0.07	1.94	2.14	1.39	5.8	0.27	8.22	74.2	61.5		15.86						446	859	13.7	360	23.4	19	1753	43.3	90.8	80.1	53	10.7	2.13		0.71	3.16	0.51	1.23	0.17
Chen et al., 2010	CM1-04-13-01	21.3	1	30.4958	86.0708			-11		71.61	0.92	9.51	4.82		0.06	1.93	2.06	1.12	5.96	0.26	8.83	80.9	58.5		16.8						442	937	15.4	394	23.9	18.8	1801	43.5	94.8	73.4	53.2	10.7	2.14		0.71	2.82	0.48	1.26	0.16
Chen et al., 2011	07BB-02	17.01	1	31	80.6					63.38	0.89	16.65	5.2		0.05	1.65	3.54	3.19	3.6	0.28	12.06	122	77.72	14.31	39.78						127	1030	13.02	231	8.96		1795	42.53	85.68	11.2	43.21	7.53	1.84	5.21	0.6	2.93	0.5	1.28	0.18
Chen et al., 2011	07BB-03	17.01	1	31	80.6					62.34	0.88	15.89	5.5		0.05	2.3	4.14	3.29	3.84	0.33	13.02	114.7	72.37	16.28	45.85						142	1239	17.47	227	8.66		1752	48.62	102	12.75	50.28	8.75	2.07	6.12	0.75	3.65	0.64	1.69	0.21
Chen et al., 2011	07BB-04	17.01	0.23	31	80.6	0.70792	-5.11			62.28	0.9	16.3	5.48		0.05	2.26	4.08	3.17	3.71	0.37	14.16	122	77.1	16.14	40.89						147	1283	15.51	230	8.73		1907	53.62	112	13.69	52.84	9.04	2.14	6.15	0.71	3.42	0.58	1.47	0.2
Chen et al., 2011	07BB-06	17.01	1	31	80.6					69.44	0.64	14.38	3.14		0.03	0.99	2.12	3.32	4.41	0.3	6.05	66.68	29.77	6.59	15.91						217	586	12.53	171	10.95		1472	36.72	75.42	10.15	41.76	8.33	1.55	5.3	0.62	2.84	0.45	1.22	0.17
Chen et al., 2011	07BB-07	17.01	1	31	80.6					68.1	0.56	17.28	2.22		0.03	1.39	1.54	2.11	5.34	0.12
Chen et al., 2011	JM03-4	15.46	0.2	29.68	91.75	0.708828	-1.11			70.42	0.38	15.76	1.8		0.02	0.89	4.42	1.68	3.27	0.08	1.92	48.91	15.77	5.9	8.79						143	360	6.37	104	5.71		490	25.6	47.71	5.55	18.99	2.94	0.81	1.7	0.23	1.17	0.22	0.59	0.09
Chen et al., 2011	JM03-5	15.5	1	29.68	91.75	0.70726	-3.61			68.95	0.6	15.53	1.31		0.02	1.19	1.07	4.5	5.19	0.02	5.07	63.96	35.61	3.56	14.96						252	330	5.96	130	5.67		661	29.18	56.64	6.94	24.67	3.82	0.82	2.2	0.27	1.29	0.21	0.57	0.09
Chen et al., 2011	LKE03-02	13.4	0.5	29.53	91.4	0.705528	-0.33			69.95	0.51	15.53	2.49		0.04	1.73	0.91	3.71	3.86	0.02	5.19	68.18	64.48	7.12	30.17						97.87	715	3.77	123	4.68		1085	11.03	22.26	2.63	9.35	1.5	0.27	0.94	0.13	0.72	0.14	0.38	0.07
Chen et al., 2011	NM03-1	12.75	0.19	29.6	90	0.705216	-0.67			72.46	0.24	14.04	1.66		0.01	0.4	0.56	3.92	4	0.05	1.38	35.53	28.79	4.06	8.15						132	337	3.77	84.3	4.45		705	12.92	24.77	3.54	12.9	2.15	0.4	1.27	0.16	0.72	0.13	0.35	0.05
Chen et al., 2011	NM03-2	12.8	1	29.6	90	0.705144	-0.47			69.99	0.35	14.63	3.24		0.02	0.99	1.33	3.79	3.5	0.05	2.71	63.66	18.46	4.34	9.99						117	641	3.6	90.04	3.47		731	14.18	28.09	3.33	12.03	1.78	0.43	1.06	0.14	0.69	0.13	0.36	0.05
Chen et al., 2011	NM03-3	12.8	1	29.6	90	0.705122	-0.65			67.36	0.29	15.8	4.6		0.02	1.05	1.3	3.85	3.71	0.05	3.58	41.67	25.12	8.15	12.86						133	579	3.05	96.1	3.65		670	8.52	16.98	2.05	7.46	1.22	0.29	0.72	0.1	0.54	0.11	0.31	0.05
Chen et al., 2011	NM03-4	12.8	1	29.6	90	0.705214	0.05			66.95	0.47	16.78	3.42		0.01	1.28	0.69	4.68	3.07	0.04	3.4	65.63	16.77	7.65	9.77						143	658	4.28	110	3.3		696	12.2	25.88	3.27	12.5	2.25	0.52	1.39	0.18	0.88	0.16	0.43	0.07
Chen et al., 2012a	CQ1-04-01	16	1	31.45	84.4167	0.71105	-9.6			59.33	1.18	15.33	6.16		0.08	3.37	3.88	3.06	6.59	0.08	11.2	136	100		65.7				20.6	1.36	486	1279	13.1	428	32.1	18.5	2646	35.4	72.9	9.39	39	7.8	2.36	5.31	0.65	3.12	0.51	1.34	0.19
Chen et al., 2012a	CQ1-04-02	16	1	31.45	84.4167	0.711015	-9.16			59.13	1.15	15.32	6.32		0.07	3.37	3.79	3.11	6.61	0.06	10.2	101	59.9		65.8				20.4	1.03	522	1260	13.2	444	33.5	18.7	2722	33.5	67.6	9.12	37.9	7.35	2.4	5.01	0.68	2.96	0.51	1.33	0.2
Chen et al., 2012a	CQ1-04-04	16	1	31.45	84.4167	0.711522				60.66	1.12	14.94	5.35		0.06	3.54	3.96	2.82	6.34	0.36	9.74	118	87.1		48.2				19.1	1.32	452	1371	15.5	380	29.1	21.9	2465	48.3	109	15.1	64.1	12.6	2.69	7.7	0.86	3.64	0.6	1.6	0.2
Chen et al., 2012a	CQ1-04-05	16	1	31.45	84.4167					60.25	1.04	14.62	5.7		0.06	3.41	3.83	2.75	6.2	0.37	9.86	131	75.5		46.6				18.7	1.3	439	1124	12.2	357	28.5	19.8	2463	30.8	65.1	8.67	36.9	7.43	2.22	4.99	0.62	2.85	0.48	1.22	0.17
Chen et al., 2012a	CQ1-04-06	16	1	31.45	84.4167					60.47	1.12	14.97	5.85		0.06	3.16	3.69	2.76	6.36	0.39	9.95	134	76.8		45.3				18.1	1.42	402	1143	15.4	351	27.3	17.4	2453	44.7	93.1	12.6	51.1	10	2.25	6.56	0.75	3.47	0.59	1.55	0.22
Chen et al., 2012a	CQ1-04-09	16	1	31.45	84.4167	0.711327	-9.28			63.09	0.85	14.95	4.95		0.05	2.38	3.2	2.72	6.4	0.26	2.55	79.5	64.9		40.4				17.8	1.23	434	961	10.9	328	26.2	41.6	2113	48.3	92.7	11.9	46.9	7.81	1.85	5.23	0.57	2.4	0.42	1.08	0.16
Chen et al., 2012a	CQ1-04-16	16	1	31.45	84.4167					64	0.86	15.51	4.58		0.08	1.74	2.64	3.01	6.31	0.07	6.92	79.9	33.8		21.9				18.5	1.45	446	967	12.9	318	25.1	10.7	1687	42.2	84.5	10.3	42.6	7.96	1.77	5.13	0.6	2.82	0.51	1.31	0.2
Chen et al., 2012a	CQ1-04-20	16	1	31.45	84.4167		-9.8			63.23	0.92	15.68	5.27		0.06	1.57	2.68	3.13	6.07	0.03	7.25	83.4	20.4		14.7				18.6	1.35	383	1369	15.6	315	28.7	18.8	2154	38.5	80.5	11.2	46.7	9.39	2.49	6.06	0.74	3.42	0.61	1.52	0.24
Chen et al., 2012a	CQ1-04-21	16	1	31.45	84.4167	0.711155	-9.79			63.75	0.89	15.57	4.95		0.08	1.86	3.1	3.43	5.85	0.12	7.1	77.8	17.6		13.6				19.5	1.48	393	1248	19.7	361	29.2	34.2	1928	58.6	124	16.1	68.3	12.5	2.48	8.17	0.96	4.3	0.76	2.02	0.27
Chen et al., 2012b	04DYH-01									55.33	1.01	15.11	7.2		0.17	6.34	6.64	3.12	3.34	0.28	16	130	354	42.1	154	27.7		41.4	17.6	1.4	88.26	1616	14.9	314	14.4		1845	60.5	119	12.9	46.82	7.13	2.11	4.44	0.62	3.18	0.58	1.48	0.2
Chen et al., 2012b	05S2-4	18		31.3224	82.9091					58.63	1.5	11.64	5.68		0.06	7.09	3.64	1.57	8.28	0.59	15	94.82	317	19.5	211	35.5		47.4	20.7	1.68	517	689	26.4	694	34.3		2914	73.6	190	32.3	148	31.5	4.73	13.8	1.45	5.28	0.81	2.03	0.26
Chen et al., 2012b	05S2-6	18		31.3224	82.9091					57.89	1.47	11.3	5.93		0.08	7.74	3.59	1.53	8.55	0.75	15.4	107	365	21.5	234	21.5		54.2	22.3	1.98	662	704	23.2	706	35.2		2993	49.6	149	26.2	127	28	4.26	12.5	1.3	4.95	0.75	1.91	0.24
Chen et al., 2012b	05S2-9	18		31.3224	82.9091					58.62	1.33	12.54	6.75		0.08	7.24	3.77	1.86	7.32	0.11	17	120	386	23.5	209	33.6		57.3	19.4	2.11	488	851	18.5	563	30.6		3284	31.2	75.84	12.4	59.2	15	4.4	8.09	0.92	3.89	0.63	1.57	0.21
Chen et al., 2012b	05SLP5-1	18		31.3224	82.9091					55.77	1.48	13.29	6.92		0.09	6.99	4.81	2.34	6.31	0.57	15.4	136	328	25.3	171	23.8		66.5	21.7	2.03	515	1031	24.7	571	28.7		2503	75.8	180	29	128	24.7	4.61	11.9	1.23	4.75	0.77	1.98	0.25
Chen et al., 2012b	05SLP5-2	18		31.3224	82.9091					59.31	1.37	12	5.56		0.07	7.02	3.36	1.79	8.16	0.43	12.4	82.4	256	18.8	194	37.5		60.4	21	1.41	698	942	19.9	709	30.5		2797	69.9	169	27.1	118	23.2	4.52	11	1.03	4.01	0.6	1.56	0.21
Chen et al., 2012b	05SLP5-4	18		31.3224	82.9091					56.97	1.45	13.45	6.54		0.08	6.75	4.35	2.37	6.52	0.36	15.6	146.4	318	23.7	152	26.3		66.3	21.8	2.04	498	969	17.5	579	32.9		2297	63.7	142	21.2	87.83	16.5	3.46	7.86	0.83	3.45	0.57	1.44	0.19
Chen et al., 2012b	08SLP4-2	18.2	0.23	31.3224	82.9091
Chen et al., 2012b	CM10-04-04			30.8618	86.6776	0.719695	-12.677			56.63	1.66	10.83	6.07		0.08	7.18	5.49	1.75	6.89	0.3	17.3	104	396	24	210	41.5		98.4	22.4	2.6	754	839	15	953	53.2		4465	114	260	34.8	138	20.1	3.16	9.9	1.03	4.48	0.65	1.81	0.22
Chen et al., 2012b	CM10-04-09			30.8618	86.6776	0.719266	-13.3013			56.25	1.78	10.95	5.55		0.08	6.42	5.2	4.21	2.58	0.27	20.7	148	420	20.8	174	44.3		92.9	22.8	2.43	855	1182	18.6	988	57.2		4347	139	295	38.6	139	20.5	3.3	9.52	1.12	5.05	0.78	2.11	0.26
Chen et al., 2012b	CM10-04-12			30.8618	86.6776	0.719869	-13.2623			55.99	1.56	11.1	7.53		0.08	6.96	5.84	1.77	6.11	0.08	22.2	147	450	30.4	215	52.2		40.6	18.8	1.83	504	1000	12.8	741	52.7		3626	49.7	153	19.6	82.07	14.6	2.37	7.66	0.83	3.67	0.57	1.62	0.21
Chen et al., 2012b	D3141					0.709443	-6.8832			46.96	1.22	10.28	9.45		0.16	11.06	11.84	1.8	3.73	1.15	28.3	199	520	39	189	42.2		185	16.7	1.73	141	2443	35.9	475	34.9		4161	286	547	64.5	225	34.2	7.73	20.4	2.32	9.9	1.55	3.87	0.45
Chen et al., 2013	04D6437	43.35	0.22	33.7146	89.6617					58.53	0.96	15.19	6.09		0.06	4.04	5.3	2.9	4.71	0.08	14.67		188	19.03	111						108	2827	10.97	302	16.29		3648	66.5	106	11.24	39.29	5.82	1.85	3.32	0.5	2.35	0.4	1	0.14
Chen et al., 2013	04D6441	43.35	0.22	33.7146	89.6617					63.15	0.77	14.12	5.74		0.09	4.35	4.17	2.48	4.85	0.03	13.62		158	17.23	58.87						154	1770	10.26	185	14		2757	49.42	85.78	8.34	27.66	4.12	0.97	2.48	0.4	1.99	0.36	0.95	0.15
Chen et al., 2013	04DN30-2	43		34.3167	89.1926	0.706715	-3.3			55.47	1.02	15.27	7.09		0.1	6.01	6.87	3.48	3.37	0.25	17.77		362	29.75	144						86.55	1669	15.4	305	14.76		1786	61.76	112	13	47.3	7.11	2.16	4.16	0.62	3.16	0.6	1.51	0.21
Chen et al., 2013	04DN30-3	43		34.3167	89.1926					61.07	0.74	15.53	5.55		0.08	4.49	4.66	3.23	3.51	0.08	10.59		206	18.77	101						118	1135	9.89	263	9.81		1838	52.4	88.65	9.37	31.11	4.4	1.38	2.5	0.39	1.99	0.37	0.99	0.14
Chen et al., 2013	04DN31-1	43		34.3167	89.1926	0.707105	-4.3			62.17	0.83	16.06	5.2		0.08	3.36	4.43	3.5	3.29	0.05	9.4		116	16.5	67.31						100	1073	8.07	273	10.6		1757	43.85	69.74	7.25	24.29	3.46	1.38	2.06	0.32	1.66	0.31	0.8	0.12
Chen et al., 2013	04DN32-1	43		34.3167	89.1926					64.17	0.69	16.03	4.73		0.03	1.99	4.36	4.49	3.12	0.04	10.17		121	11.53	59.25						98.51	959	8.47	206	7.78		1968	25.13	45.76	4.75	17.19	3.01	1.02	2.04	0.32	1.74	0.34	0.88	0.13
Chen et al., 2013	04DN32-2	43		34.3167	89.1926					63.91	0.69	16.15	4.95		0.03	1.83	4.13	4.54	3.17	0.04	10.07		127	10.39	56.58						103	1030	8.36	198	7.47		2064	27.32	43.89	5.16	19.18	3.15	1.15	2.19	0.32	1.72	0.34	0.87	0.13
Chen et al., 2013	04DN35-2	43		34.3167	89.1926	0.706847	-3.4			62.83	0.79	15.96	5.24		0.05	2.57	4.11	3.46	3.3	0.14	10.57		132	12.41	72.7						107	892	6.63	221	9.33		1356	26.72	46.57	5.02	17.83	2.78	1.16	1.76	0.27	1.47	0.28	0.7	0.1
Chen et al., 2013	04DN36-3	43		34.3167	89.1926	0.707479	-4.7			60.93	0.92	15.9	5.7		0.09	4.1	5	3.17	3.38	0.21	11.26		162	20.76	85.75						113	917	11.75	228	9.17		1290	43.22	73.92	8.38	30.15	4.82	1.41	3.16	0.47	2.44	0.44	1.13	0.16
Chen et al., 2013	04DN37-2	43		34.3167	89.1926	0.706428	-3			57.91	0.9	16.65	5.72		0.12	4.24	6.4	3.43	3.39	0.06	16.81		307	20.81	97.52						86.32	1281	7.98	231	9.11		1447	18.06	32.9	3.83	15.09	2.8	1.39	2.17	0.31	1.74	0.32	0.84	0.12
Chen et al., 2013	04DN39	43		34.3167	89.1926					62.9	0.84	15.89	5.67		0.09	2.78	4.51	3.44	3.29	0.14	9.13		235	10.99	86.18						127	851	8.82	180	7.07		1300	33.71	58.02	6.1	20.81	3.18	1	1.97	0.32	1.7	0.33	0.93	0.14
Chen et al., 2013	04DN40	43		34.3167	89.1926					65.55	0.55	15.27	3.86		0.04	2.85	4.04	3.33	3.55	0.05	7.02		169	16.5	103						117	1220	10.33	217	8.48		1483	50.14	92.73	10.37	35.14	5.13	1.23	2.86	0.41	2.08	0.38	1.01	0.15
Chen et al., 2013	04DY44-2	43		34.3167	89.1926					59.41	0.88	16.11	5.84		0.07	3.83	5.81	3.11	3.29	0.19	13.82		291	17.31	104						109	1152	12.03	217	9.53		1358	41.63	75.59	8.94	31.83	4.84	1.44	3	0.47	2.42	0.45	1.22	0.17
Chen et al., 2013	04DY44-4	43		34.3167	89.1926					63.77	0.6	15.32	4.44		0.17	3.36	4.21	3.58	3.56	0.13	8.54		183	23.39	132						127	1519	10.14	212	7.57		1952	50.61	91.11	9.7	33.15	4.77	1.27	2.66	0.39	1.99	0.37	0.97	0.14
Chen et al., 2013	04DY44-7	43		34.3167	89.1926	0.706427	-4.3			60.04	0.82	15.79	5.48		0.05	3.67	5.74	3.43	4.08	0.02	10.84		206	17.08	88.09						105	1907	8.33	207	8.9		2120	49.22	81.6	8.3	28.3	4.18	1.44	2.46	0.35	1.73	0.33	0.86	0.12
Chen et al., 2013	04JYL-07	43		33.9872	88.7708	0.706882	-4.4			61.2	0.83	15.2	5.26		0.07	4.37	4.48	2.94	4.28	0.08	8.51		176	17.91	92.2						157	1552	11.74	299	14.52		1923	69.8	118	12.89	43.63	6.13	1.6	3.44	0.49	2.42	0.43	1.14	0.15
Chen et al., 2013	04LQS-14	43		34.5334	88.0155	0.707001	-3.2			67.38	0.44	15.88	3.33		0.05	1.66	3.17	4.24	3.23	0.15	5.51		33.65	7.22	23.89						98.82	816	8.49	239	4.9		1296	52.24	90	10.12	34.72	5.07	1.08	2.86	0.41	1.8	0.33	0.81	0.12
Chen et al., 2013	04LQS-16	43		34.5334	88.0155	0.706325	-3.1			64.4	0.55	16.26	4.56		0.05	2.26	4.56	4.29	2.75	0.03	10.53		88.43	11.11	64.45						72.56	1248	7.77	157	5.53		1456	18.23	30.29	3.43	13	2.45	0.88	1.79	0.29	1.62	0.31	0.84	0.14
Chen et al., 2013	04LQS-2	43		34.5334	88.0155	0.706477	-2.9			61.64	0.5	14.84	4.8		0.07	5.43	5.2	3.95	3.31	0.06	10.93		212	17.2	146						84.24	2276	8.99	183	7.56		1741	56.13	92.16	10.27	36.61	5.39	1.45	2.77	0.41	1.82	0.32	0.84	0.13
Chen et al., 2013	04LQS-3	43		34.5334	88.0155	0.706589	-3.1			63.15	0.55	15	4.83		0.04	4.01	4.68	3.95	3.52	0.06	10.28		253	13.01	125						95.07	2113	7.85	199	8.31		1880	47.74	70	7.59	26.41	3.93	1.7	2.13	0.34	1.65	0.29	0.75	0.12
Chen et al., 2013	04LQS-6	43		34.5334	88.0155	0.706707	-3.3			57.77	0.77	15.41	6.16		0.09	4.65	7.71	4.01	2.49	0.47	12.9		209	21.08	150						55.96	2118	16.6	217	11.87		1520	73.12	128	14.46	51.17	7.34	1.79	4.34	0.66	3.27	0.59	1.45	0.21
Chen et al., 2013	04YJL-05	43		33.9872	88.7708	0.706194	-4.7			58.44	0.79	15.19	7.18		0.09	5.73	6.34	3.03	2.93	0.04	16.65		368	24.71	173						84.64	1876	11.96	211	9.61		1957	44.95	92.9	7.98	28.65	4.66	1.21	3.1	0.45	2.45	0.49	1.24	0.19
Chen et al., 2013	04YJL-06	43		33.9872	88.7708	0.706913	-4.8			62.99	0.83	15.89	4.71		0.06	3.56	4.31	3.34	4.17	0.09	6.92		159	16.05	82.01						158	1747	9.58	306	13.62		2255	60.24	103	11.18	38.37	5.22	1.66	2.84	0.43	2	0.35	0.93	0.12
Chen et al., 2013	04YJL-09	43		33.9872	88.7708	0.706913	-6.2			64.22	0.7	14.51	4.4		0.06	3.66	3.63	2.62	4.45	0.09	8.34		151	14.64	73.63						181	1095	13.23	282	12.73		1844	61.89	110	12.25	41.37	5.93	1.43	3.38	0.54	2.68	0.5	1.32	0.19
Chen et al., 2014	DG01-1	115.7		31.3423	88.9248			1.67857		75.08	0.23	13.39	2.7		0.03	0.12	0.21	3.52	4.6	0.04	5.54	11.7	6.14	1.97	6.29	10.7		80.3	21.1		237	38.3	58.1	332	15.9	6.59	315	36.8	90.7	9.07	35.5	8.03	0.9	8.15	1.52	9.84	2.22	6.16	0.96
Chen et al., 2014	DG01-2	115.7		31.3423	88.9248					75.99	0.25	13.3	2.29		0.01	0.15	0.16	3.64	4.49	0.03	5.63	10.1	5.29	1.02	3.25	6.53		58.8	20.6		229	26.3	61.5	320	16.2	4.69	327	51.8	105	12.1	48.5	10.5	1.08	10.2	1.74	10.8	2.33	6.54	0.99
Chen et al., 2014	DG02-1	115.7		31.3423	88.9248					76.86	0.2	13.24	1.6		0.01	0.09	0.18	3.71	4.43	0.03	4.53	2.64	2.18	0.43	0.82	7.26		72.3	21.7		205	26.5	65.2	342	17	4.33	485	57.9	128	14	55	12	1.15	11.1	1.88	11.6	2.49	6.95	1.03
Chen et al., 2014	DG03-1	114.3		31.3196	88.9034					75.7	0.39	14.96	0.42		0.01	0.18	0.24	3.28	4.9	0.06	10.9	7.63	2.56	0.28	1.35	3.8		9.79	17.9		253	45	51.5	469	16	6.83	481	35.9	80.3	8.97	36.3	8.04	0.9	7.42	1.3	8.5	1.9	5.52	0.88
Chen et al., 2014	DG05-1	114.3		31.3196	88.9034					68.74	0.64	14.08	5.67		0.09	0.95	2.2	3.32	3.71	0.16	13.4	33.6	10.5	7.07	5.35	17.7		88.5	21		179	92.8	59.5	443	15.8	5.52	403	43.9	92.4	11	44.4	9.74	1.69	9.79	1.65	9.98	2.18	5.95	0.92
Chen et al., 2014	GRC02-1	114		31.0662	88.219					66.05	0.58	15.52	5.31		0.08	2.63	3.27	2.35	3.65	0.1	14.6	93.7	16	12.2	6.47	30.79		62.2	17.1		160	204	22.2	136	9.01	7.25	507	30.9	59	6.2	22	4.34	1.04	3.98	0.62	3.69	0.79	2.14	0.34
Chen et al., 2014	GRC03-1	113.8		31.2071	88.1128		-3.5			50.84	1.8	16.85	12.1		0.19	4.73	7.69	4.77	1	0.45	29.3	277	27.2	28	14.9	43.6		115	20.1		28.04	491	33	170	10.1	2.96	252	27.3	58	6.98	30.3	6.49	1.86	6.32	0.97	5.8	1.19	3.21	0.47
Chen et al., 2014	GRC03-2	113.8		31.2071	88.1128					67.42	0.56	15.46	4.63		0.07	1.67	3.08	3.59	3.19	0.11	11.9	81.9	8.66	9.57	3.9	7.34		56.5	15.7		137	288	19	126	8.31	10.3	481	30.5	56.3	5.75	20.1	3.83	0.9	3.5	0.54	3.2	0.68	1.89	0.3
Chen et al., 2014	SZ01-1	116.9		30.7585	88.9227	0.7132	-9.4	-5.54167		67.38	0.64	13.72	5.53		0.1	1.61	5.31	2.04	3.41	0.12	14.2	87	15.3	12	4.71	10.1		74.7	14.3		120	146	27	153	9.63	4.15	770	31.4	59.4	6.17	23.9	4.39	1.04	4.19	0.66	4.12	0.88	2.47	0.37
Chen et al., 2014	SZ01-2	116.9		30.7585	88.9227					66.49	0.71	14.59	6.49		0.11	2.04	3.89	1.96	3.39	0.13	15.9	104	16.2	12.4	5.55	7.01		74.1	16		153	164	30.1	167	9.77	5.77	620	29.9	60.1	6.6	25.7	5.19	1.2	5	0.8	4.76	1.01	2.78	0.41
Chen et al., 2014	SZ02-1	116.9		30.7585	88.9227	0.7209	-13.6			60.51	0.85	16.47	7.61		0.13	3.23	6.24	2.04	2.68	0.14	22.8	130	55	16.8	11.2	14.7		83.4	20.6		106	194	32.9	188	12.3	5.75	559	39.7	79.1	8.69	34.1	6.73	1.36	6.21	0.97	5.83	1.24	3.43	0.51
Chen et al., 2014	SZ03-1	116.9		30.7585	88.9227					60.55	0.88	16.44	7.68		0.12	4	5.68	1.81	2.54	0.14	24.5	138	53	17.1	8.59	20.6		83.1	20.1		101	199	33.2	190	12.6	4.32	563	40.7	80.8	8.89	35.5	6.86	1.41	6.39	0.99	5.94	1.26	3.53	0.51
Chen et al., 2014	SZ04-1	116.9		30.7585	88.9227	0.7218	-13			60.62	0.86	16.49	7.67		0.13	3.74	5.91	1.7	2.72	0.14	23	135	50.2	17.3	8.54	16.8		82	19.6		112	178	31.8	185	12.1	4.39	542	38.9	77.9	8.6	33.9	6.63	1.33	6.09	0.96	5.71	1.22	3.38	0.5
Chen et al., 2014	SZ04-2	116.9		30.7585	88.9227					61.11	0.86	16.37	7.51		0.14	3.66	5.97	1.67	2.72	0.14	23.2	134	54.7	17	8.25	17.8		80.9	19.2		113	184	32.6	187	12.3	4.41	546	39.3	78.2	8.76	34.2	6.63	1.36	6.18	0.97	5.81	1.23	3.43	0.51
Chen et al., 2014	SZ05-1	116.9		30.7585	88.9227					65.12	0.69	15.57	5.9		0.08	2.72	4.01	2.93	3.19	0.12	15	108	15.9	12.2	5.14	10.8		63.4	17		129	235	22.7	142	9.46	5.55	424	31.4	60	6.35	24	4.64	1.06	4.28	0.68	4.06	0.87	2.44	0.37
Chen et al., 2014	SZ05-2	116.9		30.7585	88.9227	0.7123	-9.4			66.15	0.64	15.53	4.77		0.1	3	3.72	2.75	3.22	0.12	14.1	102	25	11.5	10.4	10.3		63.5	17.2		142	221	19.7	153	9.53	5.17	398	33.9	63.4	6.56	24.6	4.62	1.02	4.15	0.64	3.72	0.77	2.16	0.33
Chen et al., 2014	SZ05-2R	116.9		30.7585	88.9227					66.21	0.64	15.56	4.79		0.11	3	3.71	2.76	3.21	0.12	14	103	16.7	11.6	6.36	10.2		64.5	17.3		143	223	19.7	142	9.47	5.28	400	34.4	64.5	6.65	24.6	4.67	1.02	4.16	0.63	3.75	0.77	2.16	0.33
Chen et al., 2014	SZ06-2	116.9		30.7585	88.9227					64.87	0.66	15.67	5.7		0.1	2.58	3.83	3.28	3.42	0.12	14.7	106	15.2	11.8	5.4	9.75		62.6	17.2		144	249	25	147	9.34	4.35	431	33.7	63.5	6.76	25.3	4.86	1.09	4.63	0.73	4.35	0.93	2.58	0.39
Chen et al., 2014	SZ07-1	110.9		30.7585	88.9227	0.7141	-9.3			64.91	0.67	15.79	6.13		0.08	1.64	4.28	1.58	4.43	0.11	15.7	98.5	17.9	12.7	5.1	7.44		71.9	19.1		138	143	28.5	150	9.56	3.7	556	31.6	57.5	6.05	24	4.69	1.01	4.58	0.74	4.61	0.99	2.81	0.42
Chen et al., 2014	SZ09-1	112.1		30.9045	88.6593	0.7182	-2.3			49.15	1.46	17.56	10.23		0.16	6.42	11.29	2.31	0.74	0.26	26.2	186	102	34.1	57	31.3		76	16.5		28.61	390	27.7	139	6.57	22.1	131	14.5	34	4.39	20.1	4.75	1.44	4.87	0.82	5.04	1.07	2.93	0.42
Chen et al., 2014	SZ10-1	112.1		30.9045	88.6593	0.7147	-9.1			65.85	0.7	15.61	6.51		0.08	2.64	1.01	3.66	3.41	0.12	16.9	125	19.4	14.4	6.75	3.51		93.3	17.9		155	212	22.6	144	9.86	5.98	469	30.1	63.6	6.09	23.2	4.26	0.92	3.94	0.64	3.92	0.85	2.35	0.34
Chen et al., 2014	SZ10-2	112.1		30.9045	88.6593					66.81	0.69	15.3	5.49		0.11	3.12	2.01	3.38	3.24	0.12	14.7	104	15.6	12.1	5.04	8.31		90.6	17.7		147	208	18	144	9.51	5.62	447	28.5	52.7	5.8	21.4	4.06	0.94	3.64	0.55	3.27	0.7	2.04	0.33
Chen et al., 2014	SZ11-1	112.1		30.9045	88.6593	0.7083	-0.1			49.08	1.33	17.02	10.68		0.17	6.43	9.7	4.28	1.5	0.18	26.6	168	206	37.1	95.9	35.3		67.1	15.2		64.82	429	26.1	132	4.58	2.09	158	9.9	23.4	3.15	14.3	3.84	1.29	4.17	0.73	4.59	1	2.75	0.4
Chen et al., 2014	SZ12-1	112.1		30.9045	88.6593	0.7077	0.6			50.03	1.52	17.44	10.54		0.13	8.21	7.54	3.82	0.91	0.21	27.4	188	201	35.9	94.7	32.8		73.3	15.7		31.44	297	28.1	132	5.01	5.83	148	10.8	26.1	3.57	16.2	4.31	1.38	4.73	0.81	5.1	1.1	3.01	0.44
Chen et al., 2014	SZ12-2	112.1		30.9045	88.6593	0.707	-0.9			47.66	1.66	17.18	11.47		0.16	8.25	9.77	2.98	0.26	0.28	25.6	184	174	36.3	117	64.9		83.1	16.5		5.93	262	29	128	6.9	3.1	151	13.4	31.7	4.3	19.7	4.83	1.43	5.01	0.85	5.26	1.12	3.06	0.45
Chen et al., 2014	SZ12-3	112.1		30.9045	88.6593	0.7088	-0.1			49.46	1.45	17.5	10.87		0.13	8.81	6.66	4.17	1.04	0.19	26.5	177	214	38.9	94	49.9		73.3	15.7		41.37	431	26.5	124	4.62	8.39	178	10.2	24.2	3.33	14.8	3.97	1.34	4.28	0.75	4.68	1.02	2.8	0.4
Chen et al., 2016	AD1314-8	240.6	1.1	33.4995	91.905	0.707935	1.75			49.52	1.47	19.08	10	2.17	0.09	6.77	2.91	5.63	1.51	0.51	19.99	174.8	118.71	27.03	64.25				17.4		56.3	454	21.5	176	6.3	21.07	129	16.4	35.9	4.6	19.1	4.16	1.14	3.89	0.78	4.42	0.83	2.25	0.39
Chen et al., 2016	AD1315-1-1	241		33.4995	91.905	0.708619	1.78			50.04	1.62	17.53	7.6	1.48	0.14	10.2	4.82	4.89	0.93	0.37	28.89	198.5	393.84	50.5	174.92				16.1		34.2	188.7	20.2	135	6.21	18.72	158	11.6	28.5	4.04	17.7	4.09	1.5	3.92	0.73	4.28	0.82	2.15	0.37
Chen et al., 2016	AD1315-1-2	241		33.4995	91.905	0.707709	1.75			50.9	1.46	15.67	9.93	1.83	0.14	9.64	4.26	5.24	0.24	0.31	24.95	274.8	398.25	37.78	131.16				12.5		7.4	132.1	18.2	127	4.75	10	47	11.3	28.5	4.08	18	4.31	1.44	4.02	0.7	3.87	0.7	1.96	0.33
Chen et al., 2016	AD1315-2-1	241		33.4995	91.905	0.707999	1.99			48.32	1.25	16.19	12.46	1.68	0.17	7.41	5.34	6.21	0.33	0.32	18.23	176.4	205.02	39.46	152.33				14.1		8.2	122.4	17.1	138	5.41	1.27	93	19.6	41.6	5.3	20.9	4.27	1.54	3.99	0.68	3.81	0.74	1.93	0.31
Chen et al., 2016	AD1315-2-2	241		33.4995	91.905	0.707773	1.71			50.11	1.39	17.11	9.6	1.82	0.17	7.72	4.76	6.47	0.32	0.37	20.86	166.9	222.84	44.69	172.93				16		7.8	136.5	17.6	157	6.19	1.19	87	17.1	36.5	4.66	18.7	3.91	1.34	3.71	0.65	3.71	0.7	1.9	0.33
Chen et al., 2016	AD1315-2-3	241		33.4995	91.905					50.23	1.3	16.22	9.89	1.73	0.17	7.25	6.02	6.17	0.31	0.37	20.57	144.6	230.13	42.93	167.54				15.1		7.7	125.8	20.7	156	6.17	1.29	87	20.4	44.1	5.64	22.9	4.74	1.57	4.11	0.79	4.4	0.82	2.24	0.38
Chen et al., 2016	AD1315-2-4	241		33.4995	91.905					47.65	1.29	15.81	14.14	1.58	0.19	6.5	5.78	6.14	0.37	0.29	17.83	217.8	222.39	38.36	148.59				14.5		10.3	119.2	17.1	152	6.13	1.85	99	19.4	43.6	5.52	22.5	4.92	1.59	3.96	0.74	4.06	0.76	2.08	0.33
Chen et al., 2016	AD1315-3-1	241		33.4995	91.905					49	1.4	17.68	10.06	1.23	0.14	9.83	3.89	5.2	0.9	0.28	30.45	307.5	301.05	46.83	142.04				16.8		33.5	247.6	21.8	136	6.57	28.22	194	12.6	29.8	4.1	17.7	4.25	1.58	4.07	0.78	4.53	0.91	2.51	0.43
Chen et al., 2016	AD1315-3-2	241		33.4995	91.905					49.66	1.38	17.69	8.69	1.22	0.16	9.92	4.97	4.73	0.94	0.28	29.25	187.6	243.27	48.53	139.7				16.2		34.3	193	19.7	136	6.19	25.81	192	11.3	26.4	3.74	16.4	3.72	1.34	3.72	0.69	3.98	0.78	2.12	0.38
Chen et al., 2016	AD1315-3-3	241		33.4995	91.905					51.04	1.42	17.61	9	1.5	0.11	10.43	1.87	6.08	0.32	0.28	27.7	178.4	268.2	45.97	123.9				14.5		8.4	231.9	18.4	134	5.39	9.89	83	15.2	32.6	4.13	16.9	3.85	1.31	3.73	0.69	4.01	0.77	2.12	0.36
Chen et al., 2016	AD1315-3-4	241		33.4995	91.905					52.05	1.4	17.1	9.81	1.54	0.12	9.14	1.9	5.67	0.62	0.33	25.25	154.7	257.58	41.41	146.37				14.7		16.6	260.8	19.4	136	5.68	9.55	165	13.9	32	4.22	17.6	3.89	1.27	3.69	0.72	4.21	0.84	2.28	0.38
Chen et al., 2016	AD1315-3-5	241		33.4995	91.905					50.84	1.4	17.42	8.26	1.47	0.12	8.75	4.55	5.76	0.78	0.31	24.11	165.4	232.02	38.14	148.59				14.2		14.9	104.7	21.5	143	6.3	10.51	135	12.7	30.4	4.14	17.8	4.15	1.41	3.99	0.73	4.36	0.85	2.37	0.41
Chen et al., 2016	AD1315-3-7	241		33.4995	91.905					49.28	1.38	16.74	9.79	1.84	0.15	10.64	3.74	5.45	0.29	0.35	25.31	98.49	267.12	43.72	150.7				14.9		6.2	189.5	22.6	145	6.11	2.6	103	13.2	30.9	4.23	18.3	4.22	1.56	4.11	0.73	4.43	0.86	2.54	0.45
Chen et al., 2016	AD1315-5-5	240.4	1.1	33.4995	91.905					52.99	1.51	17.06	7.63	2.42	0.12	6.96	4.24	5.66	0.55	0.49	16.74	108.3	122.67	28.43	54				12		25.1	216.1	18.5	158	6.12	48.8	55	20.1	44.6	5.83	23.7	4.97	1.56	4.01	0.76	4.04	0.71	1.93	0.35
Chen et al., 2016	AD1315-6-1	241		33.4995	91.905					53.54	1.5	18.7	2.91	2.34	0.15	8.43	4.73	5.84	0.97	0.56	21.19	135.7	103.86	32.62	58.12				16.5		36.2	602.7	21.9	159	13.71	21.37	461	17.9	41.4	5.53	23	4.94	1.49	4.4	0.78	4.44	0.85	2.31	0.41
Chen et al., 2016	AD1315-6-2	241		33.4995	91.905					52.92	1.51	18.54	2.52	3.15	0.2	10.57	2.84	5.38	1.49	0.5	20.4	126	108.99	31.53	51.58				14.8		42.8	1102	22.1	172	15.33	17.81	981	18.5	42.7	5.7	23.5	4.78	1.67	4.41	0.76	4.26	0.84	2.31	0.42
Chen et al., 2016	AD1315-6-3	241		33.4995	91.905					54.04	1.38	18.21	3.05	1.96	0.17	8.6	4.83	6.26	0.72	0.49	22.03	147.4	125.1	29.6	70.47				14.6		24.9	1147	18.2	158	13.75	14.51	527	16.2	37.2	4.92	20	4.05	1.35	3.65	0.64	3.66	0.7	2	0.33
Chen et al., 2016	AD1315-6-4	241		33.4995	91.905					52.67	1.52	19.03	3.52	2.99	0.19	10.15	2.79	5.3	1.03	0.52	21.06	150.8	124.83	39.99	62.21				17.3		36.2	808.7	22.6	181	15.82	22.48	617	20.1	44.8	5.78	22.9	4.72	1.47	4.33	0.76	4.54	0.91	2.56	0.47
Chen et al., 2016	AD1315-7-1	241		33.4995	91.905					52.53	1.52	19.93	3.57	2.22	0.19	8.02	5.03	5.11	1.13	0.47	23.85	147.8	139.32	30.03	65.6				17		45.8	700.1	23	159	12.53	26.64	547	20.5	46	6.03	24.9	5.02	1.75	4.57	0.82	4.53	0.88	2.53	0.44
Chen et al., 2016	AD1315-7-10	241		33.4995	91.905	0.707446	-0.48			54.22	1.42	17.94	3.96	4.36	0.14	6	3.86	6.05	1.25	0.5	18.07	125.8	118.98	27.67	56.99				12		27.7	949.6	23.7	168	12.19	12.56	788	21.1	50.6	6.7	26.8	5.56	1.86	4.84	0.86	4.81	0.92	2.57	0.43
Chen et al., 2016	AD1315-7-11	241		33.4995	91.905	0.708044	-1.03			53.16	1.42	18.33	4.82	4.21	0.15	6.21	3.95	5.62	1.35	0.46	19.95	143.9	142.11	33.15	66.73				13.8		33.2	1151	19.9	174	14.46	17.35	804	21.3	46.4	5.92	23.8	4.65	1.64	4.08	0.71	4	0.77	2.2	0.39
Chen et al., 2016	AD1315-7-12	241		33.4995	91.905	0.708056	-1.11			51.8	1.29	18.27	5.32	3.95	0.14	5.77	6.96	5.28	0.57	0.44	18.59	140.5	122.94	28.2	60.19				15.9		18.6	745.7	20	150	12.15	19.73	285	22.7	48	6.03	24.1	4.74	1.73	4.23	0.68	3.94	0.76	2.1	0.37
Chen et al., 2016	AD1315-7-13	241		33.4995	91.905					51.68	1.57	16.47	2.32	4.17	0.18	8.35	9.59	3.74	1.31	0.28	21.03	156.3	139.59	20.79	65.33				15.1		52.5	877.5	21.9	167	11.38	16.01	1064	11.1	30.7	4.66	20.2	4.6	1.46	4.06	0.79	4.44	0.86	2.39	0.44
Chen et al., 2016	AD1315-7-14	241		33.4995	91.905					50.42	1.55	17.47	2.24	3.83	0.17	8.21	10.77	3.26	1.43	0.29	19.74	143.1	135.09	18.03	48.93				14.5		58.5	814.6	24	164	11.58	26.75	1110	12.7	35.3	5.28	22.7	5.35	1.6	4.74	0.87	4.81	0.93	2.65	0.47
Chen et al., 2016	AD1315-7-15	242.3	1.3	33.4995	91.905					51.41	1.59	17.46	2.27	3.59	0.16	7.88	9.68	3.48	1.79	0.3	21.01	142	141.21	17.77	46.41				14.8		68.4	786.6	23.5	167	12.45	34.99	1584	12.1	34.4	5.12	21.9	5.14	1.42	4.35	0.84	4.72	0.91	2.54	0.46
Chen et al., 2016	AD1315-7-16	241		33.4995	91.905					50.47	1.58	17.45	2.59	4	0.2	7.91	10.36	3.62	1.19	0.22	21.7	141.6	143.82	23.19	65.85				15.3		49.6	1014	23.7	165	12.17	15.07	1320	14.6	40.9	5.86	25	5.38	1.65	4.75	0.83	4.8	0.91	2.52	0.45
Chen et al., 2016	AD1315-7-17	241		33.4995	91.905					50.39	1.49	16.96	2.4	3.74	0.19	7.66	11.94	3.47	1.18	0.23	19.4	136.3	144.72	18.61	57.96				14.2		52.1	897.6	22.7	158	11.03	12.27	1019	12.3	34.6	5.04	21.9	4.92	1.43	4.38	0.79	4.46	0.89	2.45	0.43
Chen et al., 2016	AD1315-7-18	241		33.4995	91.905					52.45	1.66	16.99	3.69	4.24	0.19	7.61	6.76	5.19	0.5	0.43	20.65	151.9	141.57	28.14	64.48				13.1		15.2	1148	21.3	165	12.73	2.6	532	14.1	36.6	5.22	22.4	4.86	1.39	4.4	0.77	4.35	0.82	2.18	0.41
Chen et al., 2016	AD1315-7-2	241		33.4995	91.905					52.04	1.5	18.92	4.75	1.7	0.19	7.89	5.27	5.5	1.26	0.64	20.29	163.8	116.46	28.75	61.33				17.2		76.4	1005	22.1	157	13.03	36.95	684	19.6	44.2	5.87	24.7	5.11	1.67	4.56	0.81	4.51	0.83	2.29	0.4
Chen et al., 2016	AD1315-7-3	241		33.4995	91.905					51.88	1.55	18.5	3.79	3.22	0.19	9.11	4.28	4.99	1.6	0.53	21.69	154.1	121.14	33.44	53.33				15		51.9	945.3	23.4	159	14.19	21.16	1114	18	41.6	5.51	22.7	4.8	1.6	4.3	0.78	4.49	0.87	2.46	0.43
Chen et al., 2016	AD1315-7-4	241	1.6	33.4995	91.905					52.75	1.56	18.77	3.23	2.58	0.18	9.07	4.12	5.21	1.61	0.54	21.36	130.6	125.73	30.25	52.63				14.5		49.5	976.8	24	156	13.68	20.05	1042	18.8	43.5	5.81	24.3	5.08	1.76	4.63	0.83	4.66	0.91	2.62	0.46
Chen et al., 2016	AD1315-7-5	241		33.4995	91.905					51.96	1.36	17.78	7.73	2.11	0.15	8.93	2.05	5.25	1.86	0.47	18.37	133.7	120.15	31.56	56.16				14.9		69.7	873.8	20.9	165	12.02	27.44	1093	18.8	42.5	5.59	23.4	4.65	1.63	4.26	0.76	4.19	0.82	2.27	0.4
Chen et al., 2016	AD1315-7-6	241		33.4995	91.905					50.7	1.38	17.43	8.19	2.31	0.17	8.78	3.45	5.7	1.05	0.47	17.49	128	137.52	30.1	55.83				15		31.8	1131	22.1	172	12.24	12.57	914	22	48.8	6.32	25.1	5.22	1.78	4.72	0.79	4.4	0.82	2.26	0.4
Chen et al., 2016	AD1315-7-7	241		33.4995	91.905					53.72	1.45	18.79	6.89	1.51	0.14	6.85	2.53	6.5	0.81	0.48	18.64	126.7	113.4	27.58	52.93				15.1		31.9	924.2	19.5	186	13.25	16.95	793	19.6	43.3	5.54	22.4	4.45	1.55	4.17	0.69	4.04	0.77	2.08	0.38
Chen et al., 2016	AD1315-7-8	241		33.4995	91.905	0.707828	-0.4			51.79	1.59	17.76	7.66	1.52	0.15	7.5	3.95	4.57	2.48	0.51	19.77	160.3	107.19	28.07	61.02				15.2		81.4	968.4	26.1	197	14.99	29.48	2065	23.4	53.6	7.09	28.7	5.87	1.97	5.1	0.92	5.22	0.99	2.76	0.5
Chen et al., 2016	AD1315-7-9	241		33.4995	91.905	0.707921	-0.44			53.3	1.49	17.79	4.66	4.14	0.14	5.59	5.45	5.98	0.7	0.52	18.6	137.6	118.08	29.37	56.17				12.6		15.7	761.4	21.9	173	13.03	10.69	432	19.7	47	6.33	25.6	5.21	1.68	4.6	0.78	4.5	0.84	2.37	0.41
Chen et al., 2018	15LZ01-1	118.1	1.2	29.0185	87.5004					49.4	1.82	13.65	14.64		0.21	7.39	10.78	2.89	0.06	0.14	61.78	450.24	193.7	57.1	88.54	162.1			19.45		0.65	142.5	33	108.4	2.5		10.49	4.04	10.54	1.84	9.75	3.52	1.23	4.66	0.92	5.76	1.2	3.53	0.59
Chen et al., 2018	15LZ01-4	117		29.0185	87.5004	0.705376	5	8.5		48.69	1.89	13.97	14.95		0.23	7.22	11.11	2.65	0.08	0.15	51.55	392.7	159.9	44.44	69.89	125.22			18.42		1.56	152.1	39.43	97.35	2.06		14.25	4.97	12.29	2.22	12.05	4.23	1.6	5.81	1.14	7.18	1.49	4.37	0.73
Chen et al., 2018	15LZ01-5	117		29.0185	87.5004	0.705022	5.2	9.3		48.59	1.78	12.77	15.64		0.24	8.24	11.59	1.91	0.1	0.13	63.68	458.22	245.1	55.39	98.23	147.31			19.38		1.27	151.9	35.97	94.17	2.05		18.1	4.31	10.68	1.93	10.55	3.81	1.44	5.04	1.01	6.5	1.36	3.91	0.69
Chen et al., 2018	15LZ01-6	117		29.0185	87.5004	0.705379	5.2	10		49.15	1.88	13.88	14.84		0.23	7.07	10.95	2.72	0.09	0.15	51.27	392.49	158.2	44.49	71.35	127.86			18.84		1.87	140.5	38.04	110.07	2.16		19.24	4.84	12.22	2.15	11.84	4.07	1.49	4.7	1.07	6.92	1.41	4.17	0.72
Chen et al., 2018	15LZ01-8	117		29.0185	87.5004	0.705009	4.8			49.03	1.96	13.64	15.27		0.23	7.11	11.04	2.45	0.08	0.15	42.32	374.21	155.3	46.06	62.25	123			16.51		3.1	149.06	36.31	102.66	2.22		17.39	4.38	11.72	1.9	10.45	3.83	1.37	4.74	0.97	6.36	1.37	4.01	0.64
Chen et al., 2018	15LZ01-9	117		29.0185	87.5004	0.705042	5			49.02	1.9	14.02	14.89		0.23	6.86	11.5	2.28	0.1	0.15	42.7	403.94	156.3	50.04	67.35	129.97			18.64		1.25	186.87	41.61	101.05	2.22		19.57	5.33	13.85	2.23	12.13	4.33	1.59	5.91	1.09	7.05	1.54	4.5	0.72
Chen et al., 2018	15LZ01-10	117		29.0185	87.5004					49.34	2	13.95	15.19		0.23	6.74	10.54	2.74	0.05	0.15	48.5	454.01	153.9	53.91	66.1	145.47			20.44		1.33	259.54	38.73	107.58	2.51		14.72	4.92	12.95	2.13	11.58	4.31	1.54	5.15	1.06	6.81	1.49	3.81	0.69
Chen et al., 2018	15LZ01-12	117		29.0185	87.5004					49.52	2.04	14.07	15.34		0.24	6.93	10.1	2.46	0.05	0.15	46.01	414.58	149.6	48.53	62.06	135.87			18.69		0.89	228.48	37.82	115.02	2.33		9.72	4.88	12.4	2.03	11.3	4.08	1.43	5.31	1.01	6.56	1.43	3.77	0.67
Chen et al., 2018	15LZ02-2	117.7	1.2	29.0572	87.6077		4.3	8.9		50.31	1.64	14.98	13.76		0.22	7.19	10.33	2.24	0.04	0.12	45.17	342.29	192	50.32	73.25	137.35			18.56		0.4	295.74	43	94.76	1.98		101.84	6.71	17.03	2.65	14.17	5	1.99	6.38	1.2	7.56	1.62	4.74	0.72
Chen et al., 2018	15LZ02-4	117		29.0572	87.6077		3.9	8.7		50.04	1.52	15.11	13.83		0.22	7.24	10.23	2.54	0.04	0.12	40.11	312.93	189	47.57	66.82	126.28			16.97		0.25	291.75	34.32	94.84	1.89		12.35	5.36	13.55	2.12	11.59	4.02	1.58	5.34	0.97	5.98	1.32	3.88	0.59
Chen et al., 2018	15LZ02-5	117		29.0572	87.6077		4.3	10.2		49.85	1.58	15.03	14.25		0.22	7.58	9.2	3.01	0.04	0.12	39.25	329.18	198.9	49.98	74.89	125.95			17.46		0.3	285	27.74	97.24	1.92		18.95	4.5	11.06	1.75	9.43	3.23	1.36	4.37	0.77	4.96	1.04	3.11	0.48
Chen et al., 2018	15LZ02-6	117		29.0572	87.6077		4.1	8.5		50.17	1.57	15	13.92		0.21	7.35	9.49	2.96	0.04	0.12	42.74	324.71	194.9	49.96	70.13	128.58			17.5		0.24	297.16	31.8	95.62	1.99		10.39	5.65	13.96	2.1	10.87	3.63	1.34	4.63	0.84	5.46	1.19	3.57	0.55
Chen et al., 2018	15LZ02-11	117		29.0572	87.6077					50.31	1.51	15.23	12.87		0.21	7.84	9.47	3.27	0.05	0.12	45.29	363.57	272	53.93	90.31	139.07			19.5		0.46	234.46	29.74	90.75	2.36		19.92	4.65	11.76	1.86	10.03	3.45	1.66	4.91	0.84	5.26	1.14	3.29	0.51
Chen et al., 2018	15LZ03-3	117		29.0614	87.5433					49.68	1.55	15.21	13.34		0.21	6.41	11.7	2.45	0.04	0.13	37.38	338.87	137.4	49.06	63.5	132.27			19.21		0.44	267.81	33.96	99.58	2.41		34.97	5.89	14.49	2.22	11.82	3.91	1.43	5.01	0.95	5.9	1.25	3.73	0.56
Chen et al., 2018	15LZ03-4	116.9	1.1	29.0614	87.5433					49.29	1.52	14.76	13.46		0.21	7.27	11.62	2.48	0.05	0.12	39.5	319.77	202.6	50.17	75.72	127.18			17.42		0.55	195.23	28.18	97.13	2.02		18.66	4.75	11.51	1.77	9.65	3.33	1.19	4.12	0.8	4.89	1.06	3.09	0.47
Chen et al., 2018	15LZ03-5	117		29.0614	87.5433					49.39	1.56	14.76	13.47		0.21	7.19	11.34	2.71	0.04	0.12	35.92	266.19	152.2	35.51	56.03	99.14			14.65		0.25	221.83	31.96	92.58	1.56		15.47	5.41	12.91	2.03	10.93	3.78	1.36	4.87	0.89	5.67	1.19	3.64	0.54
Chen et al., 2018	15LZ03-6	117		29.0614	87.5433					49.46	1.61	15.06	14.27		0.21	7.34	10.4	2.34	0.05	0.13	46.6	350.74	201.9	51.4	73.22	138.5			19.26		0.68	211.66	34.12	99.99	2.42		18.34	5.43	13.7	2.15	11.31	3.96	1.38	4.92	0.93	5.96	1.27	3.8	0.56
Chen et al., 2018	15LZ03-7	117		29.0614	87.5433					49.74	1.54	14.94	13.74		0.21	7.41	11.11	1.84	0.03	0.12	46.63	352.17	224.2	54.29	82.86	136.53			19.62		0.19	533.24	34.67	95.45	2.23		7.64	5.74	14.5	2.24	12.05	4.22	1.47	5.28	0.99	6.29	1.34	3.91	0.6
Chen et al., 2018	15LZ04-1	117		29.0452	87.6545		3.9	9.6		49.21	1.54	14.99	13.67		0.21	7.28	11.05	2.61	0.04	0.12	32.07	274.27	157	40.98	62.9	102.5			14.7		0.22	285.67	23.12	94.68	1.85		3.37	4.32	10.39	1.52	7.88	2.57	0.93	3.42	0.6	3.84	0.83	2.48	0.4
Chen et al., 2018	15LZ04-3	117		29.0452	87.6545					51.36	1.6	14.47	13.69		0.2	7.36	8.85	3.09	0.04	0.13	40.02	282.34	177	41.49	66.07	136.37			13.02		0.21	119.8	24.33	96.03	1.98		3.95	4.15	10.21	1.57	8.27	2.84	0.92	3.27	0.66	4.13	0.91	2.81	0.42
Chen et al., 2018	15LZ04-5	117		29.0452	87.6545		4	9.7		49.41	1.41	15.64	13.01		0.2	6.76	11.64	2.4	0.04	0.11	31.93	291.56	143.6	45.34	61.17	140.38			17.44		0.16	357.49	27.16	79.66	1.77		5.38	4.18	10.53	1.67	8.9	3.2	1.14	3.81	0.75	4.76	1	2.86	0.45
Chen et al., 2018	15LZ04-6	117		29.0452	87.6545			10.9		49.48	1.49	14.57	13.59		0.21	7.34	11.7	2.18	0.06	0.12	40.42	359.39	231.5	55.6	84.96	57.88			19.6		0.31	189.81	28.66	91.72	2.37		4.42	4.78	11.65	1.84	9.69	3.33	1.15	4.25	0.79	4.88	1.07	3.14	0.51
Chen et al., 2018	15LZ04-9	117		29.0452	87.6545			8.9		48.8	1.51	14.72	13.9		0.21	6.94	12.29	2.27	0.08	0.11	39.08	301.44	177.7	43.06	64.85	126.44			16.87		0.34	188.77	27.63	90.69	2.02		7.6	4.14	10.75	1.69	9.06	3.35	1.17	4.25	0.77	4.87	1.06	2.98	0.48
Chen et al., 2018	15LZ04-10	117		29.0452	87.6545					48.89	1.51	14.72	13.79		0.21	6.99	12.22	2.25	0.07	0.11	42.11	329.75	195.9	45.66	72.53	124.8			18.6		0.43	198.27	33.17	88.57	2.18		8.65	5.25	13.59	2.09	11.21	3.89	1.45	5.13	0.93	5.81	1.25	3.76	0.59
Chen et al., 2018	15LZ04-11	117		29.0452	87.6545					48.96	1.55	14.76	13.68		0.21	6.82	12.29	2.26	0.08	0.12	37.64	284.53	161.3	38.93	61.34	117.1			16.25		0.63	180.6	26.9	98.17	1.87		7.52	4.31	10.72	1.68	9.01	3.15	1.12	3.96	0.73	4.74	1.03	3.13	0.46
Chen et al., 2018	15LZ04-12	117		29.0452	87.6545					49.28	1.52	14.94	13.2		0.21	7.03	12.25	2.02	0.05	0.11	42.63	316.07	212.6	44.54	69.37	77.1			18.25		0.53	235.89	31.81	87.21	2.13		9.45	5.39	13.1	2.05	10.76	3.75	1.48	5.04	0.89	5.54	1.2	3.65	0.57
Chen et al., 2018	15KM01-2	115.9	1.4	28.5614	89.9886	0.705486	3	7.9		50.08	2.19	14.97	14.26		0.22	6.64	10.62	1.37	0.07	0.17	49.15	383.61	215.6	51.34	53.47	83.31			22.15		2.23	250.23	39.31	125.22	3.8		78.72	10.17	23.36	3.41	16.88	4.72	1.74	5.78	1.09	6.64	1.29	3.91	0.65
Chen et al., 2018	15KM01-3	117.7	1.8	28.5614	89.9886	0.705523	3.2	8		50.31	2.2	14.95	14.23		0.22	6.59	10.56	1.21	0.07	0.17	34.15	279.78	139.4	38.43	39.94	61.57			16.39		0.71	186.01	30.39	128.73	2.72		77.8	7.45	17.04	2.57	12.77	3.54	1.38	4.57	0.86	5.29	1.02	3.14	0.51
Chen et al., 2018	15KM01-4	117		28.5614	89.9886	0.705892	2.9	7.9		51.2	2.37	14.3	15.11		0.23	6.66	9.66	0.82	0.06	0.17	53.36	433.96	159	56.61	47.97	90.53			23.8		1.06	275.22	34.13	136.14	4.11		150.42	8.55	19.45	2.87	14.29	4.04	1.56	5.32	0.96	5.87	1.14	3.32	0.58
Chen et al., 2018	15KM01-5	117		28.5614	89.9886		3.3			49.34	2.21	14.55	14.51		0.22	6.59	11.65	1.31	0.05	0.17	39.49	299.82	176.5	41.66	43.49	67.58			17.73		0.66	195.89	33.52	130.45	3.1		25.75	8.51	19.68	2.9	14.19	4.03	1.49	5.3	0.96	5.82	1.13	3.2	0.56
Chen et al., 2018	15KM01-6	117		28.5614	89.9886	0.705826	2.8	7.5		50.46	2.21	14.88	14.33		0.22	6.6	10.52	1.1	0.08	0.17	44.53	349.41	184.5	47.66	46.77	73.79			20.28		2	232.94	37.77	124	3.39		58.7	9.26	21.34	3.19	16.13	4.53	1.73	5.76	1.08	6.71	1.3	3.7	0.64
Chen et al., 2018	15KM01-9	117		28.5614	89.9886					50.44	2.21	15.01	14.34		0.22	6.63	10.25	1.25	0.08	0.17	40.51	315.12	167.1	43.03	43.98	69.04			18.29		0.79	197.79	33.22	133.88	3.12		50.33	7.99	18.74	2.71	14.01	4.01	1.52	5.23	0.96	5.82	1.12	3.31	0.56
Chen et al., 2018	15KM01-10	117		28.5614	89.9886		5.4	10		48.99	1.34	15.63	12.2		0.19	7.49	12.45	2.26	0.08	0.1	44.7	302.39	262.4	49.04	65.5	115.87			17.5		1.63	151.34	24.77	79.32	1.5		15.37	3.61	9.73	1.59	8.54	2.76	1.07	3.8	0.69	4.29	0.85	2.59	0.43
Chen et al., 2018	15LZ01-13	117		29.0185	87.5004	0.712214	-12.9	-3.5		64.04	0.88	17.96	7.74		0.14	2.14	0.79	5.67	1.09	0.06	11.74	117.33	94.63	17.47	56.86	35.51			18.37		15.31	44.48	26.61	140.41	11.3		128.25	56.12	112.25	11.55	42.38	8.15	1.25	6.23	1	5.11	0.96	2.49	0.41
Chen et al., 2018	15LZ01-14	117		29.0185	87.5004		-13	-3.1		63.22	0.78	16.86	7.33		0.13	2.17	2.67	7.23	0.05	0.06	14.05	125.31	104.9	19.11	63.48	56.86			18.78		0.66	82	18.82	113.33	14.05		13.78	41.91	84.6	8.37	30.49	5.55	0.98	4.28	0.7	3.6	0.69	1.81	0.3
Chen et al., 2018	15LZ01-15	117		29.0185	87.5004	0.711683	-12.8	-2.1		63	0.76	16.29	7.56		0.12	2.44	3.38	6.86	0.06	0.06	10.82	103.36	78.28	17.09	51.84	56.15			15.87		0.2	66.99	20.57	102.39	12.33		7.02	43.72	90.75	9.04	32.5	6.18	1.17	4.85	0.8	4.05	0.77	1.94	0.32
Chen et al., 2018	15LZ01-16	117		29.0185	87.5004	0.712216	-13.4	-3		63.98	0.86	19.5	7.79		0.16	1.88	0.46	2.99	2.88	0.05	18.01	154.38	133.3	26.15	77.8	49.45			26.92		104.9	47.84	25.85	104.37	12.65		375.82	51.52	112.81	10.73	38.84	7.24	1.19	5.78	0.93	4.79	0.93	2.29	0.36
Chen et al., 2018	15LZ01-17	117		29.0185	87.5004	0.71203	-13.1	-3.5		64.78	0.83	18.68	7.58		0.2	1.85	0.7	3.32	2.49	0.06	13.34	111.91	97.4	19.79	58.36	22.17			18.48		62.52	35.04	29.54	105.07	9.67		253.83	60.4	130	12.41	45.1	8.26	1.24	6.75	1.07	5.55	1.05	2.54	0.39
Chen et al., 2018	15LZ03-9	117		29.0614	87.5433	0.713099	-13.3	-2.1		67.11	0.82	17.58	7.09		0.11	1.81	0.56	3.15	2.2	0.06	12.91	113.15	78.96	14.4	54.71	36.14			19		67.32	46.04	21.68	120.12	12.65		294.68	40.35	95.96	8.73	32.21	6.18	0.98	4.88	0.8	4.08	0.78	1.91	0.31
Chen et al., 2018	15LZ03-10	117		29.0614	87.5433	0.711677	-12.8	-4.7		69.98	0.7	14.77	6.74		0.11	1.53	1.18	4.74	0.63	0.05	7.67	79.71	68.56	11.08	42.65	4.19			13.9		10.15	53.12	28.89	111.97	9.35		72.58	61.59	121.29	12.67	47.06	8.87	1.45	6.56	1.04	5.33	1	2.5	0.38
Chen, B., et al., 2017	L13JP-20	35.01	0.31	22.7578	103.262			-2.7472
Chen, B., et al., 2017	L13JP-21	35		22.7578	103.262	0.707296	-5.1			67.81	0.33	15.25	2.77		0.06	0.53	2.07	4.73	5.3	0.01	3.96	28	7	2.86	2.97	1.87		38	20	1.06	165	1543	16.5	201	10.1	3.96	2679	82	135	13	40.14	6.34	1.51	5.28	0.64	3.34	0.63	1.66	0.24
Chen, B., et al., 2017	L13JP-22	35		22.7578	103.262	0.707299	-5.2			67.49	0.29	15.91	2.34		0.05	0.4	1.86	4.68	5.83	0.01	3.28	24	5	2.13	2.48	2.54		29	19	0.87	177	1585	13.4	174	8.48	3.01	3076	38	73	8	28.48	5.05	1.27	4.06	0.53	2.78	0.53	1.39	0.2
Chen, B., et al., 2017	L13JP-23	35		22.7578	103.262					67.94	0.31	15.69	2.36		0.05	0.4	1.82	4.6	5.7	0.01	2.92	24	6	2.28	2.51	1.55		26	19	0.84	179	1556	14	224	8.88	3.17	3081	30	62	8	28.64	5.21	1.32	4.23	0.56	2.91	0.56	1.48	0.21
Chen, B., et al., 2017	L13JP-24	35		22.7578	103.262					67.12	0.29	15.8	2.48		0.05	0.45	2.05	4.75	5.71	0.01	3.52	25	5	2.4	2.7	1.58		28	19	0.91	170	1616	14.6	244	8.97	2.96	3049	59	98	10	34.56	5.67	1.37	4.67	0.58	3.02	0.58	1.52	0.22
Chen, B., et al., 2017	L13JP-25	35		22.7578	103.262	0.707281	-4.8			68.01	0.27	15.59	2.38		0.05	0.4	1.95	4.74	5.41	0.02	3.33	24	5	2.24	2.53	1.49		27	19	0.98	168	1679	14.3	172	8.71	3.43	2831	73	119	11	34.84	5.54	1.36	4.68	0.57	2.94	0.56	1.48	0.21
Chen, B., et al., 2017	L13JP-26	35		22.7578	103.262					67.78	0.29	15.54	2.39		0.05	0.39	1.95	4.7	5.64	0.01	3.32	24	5	2.28	2.66	2.03		28	19	0.96	176	1677	14.5	214	8.88	3.59	2975	80	126	11	35.96	5.56	1.36	4.69	0.57	2.93	0.56	1.48	0.21
Chen, B., et al., 2017	L13JP-27	35		22.7578	103.262					68.12	0.28	15.57	2.41		0.05	0.41	1.68	4.71	5.62	0.02	3.45	25	5	2.28	2.38	1.86		28	19	0.96	176	1533	14.2	224	8.55	4.4	2889	64	106	10	33.68	5.43	1.34	4.46	0.56	2.89	0.55	1.46	0.21
Chen, B., et al., 2017	L13JP-28	35		22.7578	103.262					67.94	0.27	15.47	2.44		0.05	0.4	1.78	4.63	5.8	0.01	3.26	25	5	2.16	2.41	1.53		27	19	0.93	180	1580	13.3	205	8.15	4.17	2969	91	137	12	35.96	5.29	1.27	4.47	0.53	2.68	0.51	1.37	0.2
Chen, B., et al., 2017	L13JP-29	35		22.7578	103.262	0.707301	-4.8			68.06	0.29	15.43	2.5		0.05	0.4	1.86	4.55	5.73	0.01	3.35	25	12	2.23	2.49	1.52		28	19	0.98	181	1617	14.3	128	8.88	4.66	2972	89	139	12	38.43	5.72	1.38	4.83	0.57	2.91	0.56	1.45	0.21
Chen, B., et al., 2017	L13JP-36	35		22.7578	103.262					67.96	0.25	16.2	2.15		0.05	0.13	0.85	4.32	6.56	0.02	2.79	21	7	2.2	2.62	5.23		23	20	0.82	209	1542	12.6	173	8.05	5.43	3613	42	74	8	28.06	4.8	1.22	3.97	0.5	2.65	0.5	1.32	0.19
Chen, B., et al., 2017	L13JP-37	35		22.9556	102.55	0.707742	-4.6			64.94	0.44	15.35	2.69		0.05	2.16	2	3.91	7.15	0.04	7.51	57	104	7.77	36.38	33.72		43	21	0.88	349	832	14.5	296	17.52	10.24	1245	31	61	7	25.36	4.75	1.28	3.86	0.54	2.96	0.58	1.56	0.23
Chen, B., et al., 2017	L13JP-38	35		22.9556	102.55					64.33	0.54	14.89	3.32		0.06	2.69	2.4	3.77	6.75	0.05	8.69	68	119	9.08	45.14	77.26		52	20	0.96	320	735	17.7	307	20.57	9.51	1093	35	70	8	29.53	5.57	1.35	4.56	0.65	3.56	0.7	1.92	0.28
Chen, B., et al., 2017	L13JP-39	35		22.9556	102.55					63.75	0.57	14.85	3.49		0.06	2.93	2.56	3.74	6.57	0.07	9.23	72	130	9.81	48.22	74.84		54	20	1.01	315	720	18.5	364	20.8	8.98	1059	38	72	9	30.8	5.69	1.38	4.75	0.66	3.68	0.73	2	0.3
Chen, B., et al., 2017	L13JP-40	34.68	0.42	22.9556	102.55			-2.49
Chen, B., et al., 2017	L13JP-41	35		22.9556	102.55					63.08	0.67	14.61	3.82		0.06	3.27	2.79	3.53	6.55	0.08	10.36	85	193	10.33	54.18	55.79		53	21	1.09	314	716	19.8	413	24.31	9.07	1093	42	83	10	34.23	6.34	1.43	5.25	0.74	4.04	0.8	2.16	0.32
Chen, B., et al., 2017	L13JP-42	35		22.9556	102.55	0.707824	-5.4			63.14	0.5	15.03	4.32		0.05	2.8	2.18	3.55	6.83	0.08	8.57	82	116	10.38	45.02	132.1		53	20	0.9	331	688	9.1	349	21.24	9.57	1104	26	47	5	16.95	3	0.89	2.45	0.34	1.88	0.38	1.08	0.17
Chen, B., et al., 2017	L13JP-43	35		22.9556	102.55					63.79	0.64	14.74	3.49		0.06	2.93	2.54	3.58	6.64	0.09	10.02	79	157	9.76	50.09	45.12		51	21	1.12	334	752	25	360	29.95	10.77	1150	44	92	11	40.11	7.48	1.61	6.08	0.86	4.78	0.95	2.55	0.38
Chen, B., et al., 2017	L13JP-44	35		22.9556	102.55					64.37	0.52	14.91	3.26		0.06	2.82	2.47	3.76	6.64	0.05	8.74	66	117	9.82	48.1	83.13		56	20	0.92	327	753	17.1	394	19.43	9.75	1116	33	67	8	28.02	5.27	1.3	4.39	0.63	3.43	0.68	1.87	0.28
Chen, B., et al., 2017	L13JP-45	35		22.9556	102.55					63.46	0.6	14.54	3.73		0.07	3.37	2.9	3.72	6.52	0.05	10.03	79	134	11.09	54.77	76.01		56	20	0.97	316	725	20.1	428	22.16	9.64	1060	36	74	9	31.52	5.96	1.35	4.87	0.7	3.81	0.77	2.09	0.31
Chen, B., et al., 2017	L13JP-46	35		22.9556	102.55	0.707874	-4.3			63.88	0.59	14.25	3.84		0.07	3.29	2.73	3.57	6.44	0.06	10.08	84	146	11.13	56.04	82.13		64	20	1.13	318	706	21.2	382	23.78	8.71	1049	41	81	10	34.58	6.46	1.45	5.41	0.76	4.16	0.83	2.24	0.34
Chen, B., et al., 2017	L13JP-47	35		22.9556	102.55					64.3	0.5	15	3.3		0.06	2.69	2.39	3.75	6.74	0.06	8.9	68	125	9.53	47.59	53.65		52	20	0.93	325	781	17.5	283	18.76	9.4	1159	35	68	8	28.95	5.34	1.33	4.48	0.63	3.47	0.68	1.85	0.27
Chen, B., et al., 2017	L13JP-48	35		22.9556	102.55					64.25	0.55	14.75	3.4		0.06	2.92	2.5	3.63	6.62	0.05	9.68	75	133	9.72	48.81	55.73		52	20	1.02	325	731	18.4	509	20.63	10.23	1110	37	71	9	30.23	5.57	1.36	4.68	0.65	3.61	0.72	1.97	0.29
Chen, B., et al., 2017	L13TC-1	34.93	0.3	22.8044	103.048			-2.9856
Chen, B., et al., 2017	L13TC-10	35.13	0.3	22.8051	103.033			-2.7396
Chen, B., et al., 2017	L13TC-11	35		22.8051	103.033					73.26	0.24	16.06	1.6		0.03	0.73	0.07	0.16	4.69	0.02	3.23	23	11	2.42	4.01	22.62		103	21	0.54	200	7	5.5	120	4.7	6.76	96	18	33	4	12.13	2.05	0.43	1.61	0.2	0.98	0.18	0.48	0.07
Chen, B., et al., 2017	L13TC-12	35		22.8051	103.033					75.33	0.23	14.89	1.57		0.01	0.57	0.06	0.1	4.33	0.02	3.12	22	12	1.58	2.61	21.9		90	19	0.53	188	6	4.6	117	4.56	6.38	80	17	31	4	12.1	2.05	0.5	1.55	0.19	0.91	0.17	0.42	0.06
Chen, B., et al., 2017	L13TC-13	35		22.8051	103.033					75.44	0.23	14.92	1.32		0.03	0.64	0.06	0.13	4.34	0.02	3.15	20	11	2.9	2.67	16.89		108	19	0.51	200	7	4.8	119	4.66	6.68	105	18	34	4	12.86	2.22	0.53	1.7	0.2	0.96	0.17	0.44	0.06
Chen, B., et al., 2017	L13TC-14	35		22.8051	103.033					72.83	0.26	16.33	1.67		0.03	0.66	0.06	0.12	4.67	0.02	3.47	25	14	2.54	3.95	25.59		126	21	0.55	210	7	5.9	129	4.93	6.98	92	19	35	4	12.98	2.18	0.49	1.73	0.21	1.04	0.2	0.5	0.07
Chen, B., et al., 2017	L13TC-15	35		22.8051	103.033	0.714295	-4.1			71.71	0.26	16.29	1.74		0.03	0.68	0.06	0.13	5.59	0.02	3.49	25	16	2.62	5.12	15.02		126	21	0.63	234	51	5	129	5.16	7.29	645	18	33	4	12.42	2.08	0.4	1.56	0.18	0.91	0.17	0.44	0.06
Chen, B., et al., 2017	L13TC-2	35		22.8044	103.048	0.707371	-6.6			67.49	0.33	16.09	2.67		0.04	1	0.57	3.71	5.68	0.07	4.78	33	16	3.72	8.83	2.92		29	20	1.16	203	1338	13.3	160	13.03	5.19	3120	86	145	15	48.43	7.01	1.82	5.11	0.56	2.79	0.51	1.33	0.19
Chen, B., et al., 2017	L13TC-3	35		22.8044	103.048					67.77	0.32	15.85	2.65		0.03	1.14	0.61	3.93	5.49	0.06	4.57	34	15	3.86	8.99	2.59		33	19	1.06	183	1283	13.7	191	12.8	4.51	3598	79	137	14	44.34	6.4	1.61	4.94	0.54	2.76	0.53	1.42	0.21
Chen, B., et al., 2017	L13TC-4	35		22.8044	103.048					68.12	0.34	15.66	2.71		0.03	1.07	0.57	3.92	5.36	0.05	4.9	34	16	4.42	8.59	2.91		31	20	1.1	192	1238	12.7	198	13.6	4.74	3002	73	127	13	41.53	6.06	1.54	4.67	0.51	2.59	0.49	1.32	0.2
Chen, B., et al., 2017	L13TC-5	35		22.8044	103.048	0.707411	-6.8			68.05	0.35	15.62	2.8		0.03	1.15	0.51	3.88	5.22	0.05	5.11	38	19	4.3	10.19	2.66		35	20	1.07	199	1176	15.2	203	14.12	5.07	4099	63	114	11	38.12	5.85	1.51	4.68	0.55	2.89	0.57	1.54	0.23
Chen, B., et al., 2017	L13TC-6	35		22.8044	103.048					67.7	0.36	15.68	2.85		0.03	1.24	0.6	3.98	5.26	0.05	5.04	37	18	4.32	9.69	2.42		35	20	0.99	182	1200	14.5	216	13.91	4.65	3308	75	127	13	41.91	6.08	1.54	4.68	0.54	2.73	0.53	1.43	0.21
Chen, B., et al., 2017	L13TC-7	35		22.8044	103.048					67.72	0.33	15.98	2.57		0.03	1.1	0.56	3.91	5.5	0.04	4.49	33	15	3.64	8.68	2.58		31	19	0.93	183	1331	12	215	12.69	4.48	4160	56	103	10	34.15	5.23	1.44	4.07	0.48	2.49	0.48	1.29	0.19
Chen, B., et al., 2017	L13TC-8	35		22.8044	103.048					67.74	0.32	15.95	2.68		0.03	1.16	0.58	4.06	5.33	0.04	4.85	34	15	4.13	10.08	2.54		35	20	1.09	187	1293	13.9	213	13.31	4.64	3013	77	128	13	43.69	6.31	1.63	4.82	0.56	2.81	0.54	1.44	0.21
Chen, J., et al., 2017	B1005-1	242		35.8046	98.1703	0.713553	-6.8			72.5	0.21	14.25	2.24		0.06	0.43	1.89	3.6	4.09	0.06	4.16	14.4	1.4	21.2	1				16.64		189	164	26.15	105	11.14		673	26.1	50.1	5.44	20.7	4.71	0.75	4.26	0.72	4.4	0.86	2.51	0.39
Chen, J., et al., 2017	B1008-1	242		35.8958	98.0338	0.709804	-6.2			66	0.54	16.45	3.55		0.05	1.32	4.21	4.09	2.31	0.15	4.58	49.7	8.2	86.6	5.2				21.17		81	606	9.43	163	8.67		817	33.2	59.7	6.1	21.9	3.74	0.99	2.7	0.36	1.88	0.32	0.85	0.12
Chen, J., et al., 2017	B1009-1	242	1	35.9083	97.9825	0.709225	-5.5	1.86		71.1	0.33	14.6	2.9		0.06	0.84	2.62	3.76	3.43	0.09	4.33	28.8	1.9	49	2.8				17.77		139	277	18.47	129	13.31		611	35.1	63.5	6.64	23.7	4.34	0.78	3.58	0.55	3.16	0.61	1.75	0.28
Chen, J., et al., 2017	B1010-1	242		35.9237	97.9432	0.708963	-5.3			68.5	0.46	14.8	3.19		0.06	1.34	3.43	3.7	2.95	0.13	5.04	43.6	7.9	61.3	5.4				18.5		101	479	11.19	161	10.95		826	40.7	69.3	6.99	23.3	3.69	0.85	2.69	0.37	2.01	0.38	1.01	0.14
Chen, J., et al., 2017	B1012-1	242		35.9485	97.915	0.708835	-5.6			67.4	0.45	15.7	3.1		0.06	1.22	3.46	3.93	3.08	0.13	4.15	38.4	6.5	65.6	6.7				19.57		101	528	11.06	147	11.42		828	35.5	63.4	6.51	22.6	3.9	0.98	2.78	0.38	2.04	0.38	1	0.14
Chen, J., et al., 2017	B1013-1	242		35.949	97.8971	0.708924	-5.7			68.6	0.43	15.1	3.05		0.06	1.28	3.3	3.74	3.13	0.12	4.84	42.1	7.6	78.4	5.4				18.56		97	524	10.4	131	10.06		834	24.3	45.8	4.76	17.2	3.21	0.8	2.32	0.32	1.84	0.34	0.95	0.15
Chen, J., et al., 2017	B1014-1	242		35.966	97.8841					68.5	0.42	15.5	2.97		0.05	1.26	3.34	3.79	3.26	0.12	4.66	41	7.7	47.1	5.3				18.36		96	520	9.58	108	9.38		851	24.3	45.1	4.57	16.3	2.92	0.79	2.22	0.3	1.65	0.32	0.86	0.13
Chen, J., et al., 2017	B1008-2	242		35.8958	98.0338	0.709613	-6.3			54.9	1.14	18	7.5		0.13	3.67	6.59	4.38	2.6	0.27	14.74	133.4	16.6	32.8	11.1				26.2		112	524	32.64	145	19.84		656	20.4	60.3	8.97	40.9	10.01	1.72	7.75	1.13	6.28	1.09	2.91	0.42
Chen, J., et al., 2017	B1008-3	242		35.8958	98.0338	0.709569	-6.4			56.4	1.08	17.6	6.59		0.14	3.07	6.81	4.34	2.07	0.27	16.04	103.6	10	37.9	10.3				22.98		74	557	32.41	128	20.76		506	21.3	61.1	9.17	42.2	10.13	1.57	8.02	1.18	6.41	1.09	2.93	0.38
Chen, J., et al., 2017	B1010-2	242		35.9237	97.9432	0.70868	-5.4			58.3	0.81	17.65	6.46		0.17	3.4	5.92	4.69	1.78	0.22	12.23	98.1	14.3	52.8	14.1				22.34		110	450	16.11	134	11.71		378	16.7	40.6	5.34	22	4.54	1.39	3.54	0.51	2.95	0.55	1.62	0.22
Chen, J., et al., 2017	B1014-2	242		35.966	97.8841	0.708167	-5.5			59.1	0.88	16.85	6.06		0.14	3.11	4.87	4.16	1.78	0.24	11.13	83.8	10.9	44.5	8				24.89		85	438	21.25	169	22.83		566	30.2	60.7	6.91	26.5	5.42	0.91	4.4	0.63	3.5	0.69	1.92	0.29
Chen, J., et al., 2017	B1001-1	242	2	35.8267	98.2671	0.709107	-5.7	-0.69		59	0.79	17.4	6.29		0.09	3.38	5.81	3.47	2.22	0.19	14.68	101.8	31.2	47.8	15.3				20.07		91	545	18.95	99	9.85		600	26	52.4	5.98	24	4.82	1.18	4	0.62	3.59	0.69	1.96	0.27
Chen, J., et al., 2017	B1002-1	242		35.8406	98.2548	0.708805	-5.6			61.7	0.73	16.85	5.74		0.09	2.93	5.45	3.46	2.58	0.17	11.89	97.9	31.3	32.5	15.3				19.28		98	483	17.27	121	9.84		628	22.4	48.4	5.64	22.6	4.59	1.1	3.71	0.57	3.16	0.61	1.76	0.25
Chen, J., et al., 2017	11ASY003a	242		35.8406	98.2548					60.45	0.71	17.2	5.94		0.1	3.33	5.97	3.43	2	0.18											96	558	17.4	31	10.5		710	35.1	65.3	6.93	25.9	5.1	1.3	4.2	0.6	3.32	0.64	1.67	0.25
Chen, J., et al., 2017	11ASY005a	242		35.8406	98.2548					62.44	0.67	16.88	5.31		0.08	2.74	5.29	3.48	2.25	0.17											94	523	17	29	9.84		588	26.9	58.7	6.18	22.6	4.57	1.16	3.82	0.54	3.16	0.6	1.61	0.23
Chen, J., et al., 2017	11ASY006a	242		35.8406	98.2548					62.49	0.61	16.9	5.09		0.08	2.66	5.47	3.53	2.28	0.17											107	558	19.8	23	9.91		635	36.7	74	8.42	31.8	5.59	1.3	4.78	0.66	3.81	0.7	1.9	0.26
Chen, J., et al., 2017	11ASY008a	242		35.8406	98.2548					61.08	0.67	17.17	5.55		0.08	3.06	5.36	3.54	2.26	0.18											102	563	18.6	24	9.96		669	37.4	73.8	8.5	31.7	5.59	1.39	4.58	0.65	3.6	0.68	1.87	0.26
Chen, J., et al., 2017	11ASBY05a	242		35.8406	98.2548					60.9	0.71	17.04	5.68		0.08	2.78	5.32	3.4	2.51	0.17											122	491	19.6	39	11.5		609	34.5	70.2	8.02	30.1	5.56	1.24	4.59	0.66	3.68	0.7	1.92	0.27
Chen, L., et al., 2015	08_ND-3a	34	0.5	29.3128	91.7994			2.21		70.73	0.3	14.68	1.46	0.86	0.02	0.95	1.87	3.54	5.21	0.15	4.21	31.3	135	6.48	6.26				19.5		299	417	10.3	208	27.8	6.59	741	47.1	90.8	10.5	35.4	5.05	1.05	3.99	0.491	2.36	0.495	1.22	0.189
Chen, L., et al., 2015	08_ND-3b	34	0.5	29.3128	91.7994					70.41	0.28	14.34	1.08	0.85	0.03	0.82	1.72	3.44	5.5	0.14	3.92	47.2	15.7	4.85	8				20.7		283	428	11.3	58.1	36.4	7.09	781	82.8	140	14	44.4	6.35	1.18	4.54	0.57	2.86	0.528	1.53	0.271
Chen, L., et al., 2015	08_ND-3c	34	0.5	29.3128	91.7994					64.08	0.64	15.71	2.96	2.25	0.09	2.03	4.28	3.59	3.34	0.172	13.1	101	7.8	12.7	4.97				16.6		115	365	10.7	255	7.09	8.8	4157	25.9	53.2	6.63	26.1	5.01	1.05	4.95	0.791	4.58	0.932	2.69	0.415
Chen, L., et al., 2015	08ND-15a	56.3	1.4	29.3281	91.8119					64.55	0.64	15.86	2.23	3.1	0.09	1.85	4.21	3.41	3.48	0.18	14.2	112	123	13.9	4.45				17.8		145	368	18.9	220	7.67	13.8	460	26.9	53.1	6.62	25.7	5.12	1.03	4.67	0.755	4.5	0.91	2.55	0.388
Chen, L., et al., 2015	08ND-15b	56.3	1.4	29.3281	91.8119					64.09	0.59	15.92	1.57	2.77	0.07	2.49	4.19	4.49	2.71	0.23	10.7	97.9	166	11.8	39.2				19.1		95.4	741	19.9	141	5.07	4.75	546	24.2	45	5.3	19.9	3.38	1.03	2.75	0.364	1.96	0.361	0.934	0.136
Chen, L., et al., 2015	08ND-4a/8	96	1.2	29.3014	91.8058	0.70405	3.51	7.9		62	0.71	16.59	2.13	3.85	0.17	3.11	6.15	2.93	1.5	0.25	14.9	149	194	20.2	34.8				19.8		79.69	637	12.4	112	5.55	11.94	530	22.1	42.8	5.4	20.6	3.7	1.05	3.23	0.451	2.33	0.441	1.21	0.184
Chen, L., et al., 2015	08ND-4b	96	1.2	29.3014	91.8058					65.64	0.6	15.59	2.1	2.42	0.12	2.67	5.34	3.39	1.45	0.28	11.7	109	236.8	15.5	38.4				17.6		82.68	887	10.3	122	5.49	7.1	494	24.9	47.1	5.48	20.8	3.42	1.05	2.98	0.388	1.98	0.37	0.955	0.137
Chen, L., et al., 2015	09NDS-11a	30.3	0.5	29.3114	91.8072	0.706255	-1.81			76.31	0.22	13.47	0.38	0.21	0.04	0.49	2.16	3.99	1.37	0.11	3.28	27.8	2.74	1.61	2.44				16.5		61.6	528	8.04	58.8	7	3.07	295	24.3	45.3	4.77	16.9	2.59	0.671	2.18	0.29	1.43	0.254	0.776	0.126
Chen, L., et al., 2015	09NDS-11b	30.3	0.5	29.3114	91.8072					71.25	0.24	14.86	0.38	0.34	0.03	0.62	3.02	3.55	4.05	0.12	3.52	32	3.34	3.65	3.42				16.8		127	613	7.65	69.7	6.89	3.77	1156	23.6	43.8	4.68	16.5	2.47	0.711	1.94	0.261	1.33	0.255	0.714	0.118
Chen, L., et al., 2015	09NDS-12	30.3	0.5	29.3114	91.8072	0.706246	-1.81			73.04	0.25	15.15	0.4	0.31	0.04	0.64	3.62	4.71	0.78	0.12	3.45	29	3.63	3.78	4.17				16.3		33	812	8.26	68.1	7.59	2.27	271	29	53.3	5.6	19.6	2.81	0.721	2.25	0.3	1.49	0.272	0.791	0.135
Chen, L., et al., 2015	09NDS-17a	91.1	2.1	29.3067	91.8078	0.70447	3.1	13.88		60.88	0.72	16.51	2.62	1.76	0.08	3.17	5.57	3.65	2.15	0.36	12.6	144	98.8	8.52	66.2				19.3		98.3	1009	11.7	19.8	5.21	3.95	535	29.4	57.5	6.79	26.7	4.62	1.41	3.53	0.475	2.47	0.42	1.2	0.185
Chen, L., et al., 2015	09NDS-17b	91.1	2.1	29.3067	91.8078					61.2	0.74	17.29	3.31	1.3	0.05	2.18	5.32	4.23	1.98	0.38	12.3	129	62.2	8.57	34.1				21.6		77.8	1482	10	13	4.97	2.7	773	31.3	58.6	6.82	27.4	4.46	1.49	3.41	0.441	2.02	0.357	1.02	0.155
Chen, L., et al., 2015	09NDS-17c	91.1	2.1	29.3067	91.8078					66.16	0.6	16.27	2.18	0.61	0.04	1.04	4.86	2.87	3.07	0.29	9.58	99.7	40.7	4.93	15.4				17.3		140	723	12.8	13.9	5.5	4.88	735	33.8	66.4	7.69	30.2	4.9	1.42	3.81	0.521	2.64	0.468	1.27	0.181
Chen, L., et al., 2015	09NDS-17d	91.1	2.1	29.3067	91.8078					58.37	0.723	14.97	2.29	3.45	0.089	5.44	7.45	4.09	1.94	0.323	16.2	136	200	25.2	72				15.9		54.6	777	10.6	106	4.34	2.15	483	21.1	43.9	5.64	23.4	4.24	0.94	3.3	0.44	2.23	0.401	1.11	0.165
Chen, L., et al., 2015	09nds-2/LBOW	52.4	1.2	29.3036	91.8039	0.70435	3.59	9.91		66.01	0.52	15.29	2.13	2.42	0.07	1.68	3.52	3.4	3.87	0.13	10.6	96.6	9.97	13.2	6.36				18.7		164	306	24.2	43.1	7.3	11	561	32.1	62.6	7.01	26.2	4.93	0.95	4.37	0.74	4.09	0.815	2.36	0.387
Chen, L., et al., 2015	09NDZ-15	30.3	0.5	29.3114	91.8072	0.70611	-3.79	10.35
Chen, L., et al., 2015	09NDZ-19a/21	93.7	1.7	29.3031	91.7967	0.70596	3.47	13.02		72.79	0.25	14.57	0.36	0.56	0.01	0.66	2.38	4.46	1.9	0.06	2.62	22.2	3.17	1.17	2.65				14.9		86	280	8.3	193	7.87	3.05	274	30.5	53.6	5.83	20.3	2.9	0.731	2.16	0.282	1.56	0.292	0.847	0.135
Chen, L., et al., 2015	09NDZ-19b	93.7	1.7	29.3031	91.7967					74.5	0.24	14.18	0.48	0.67	0.01	0.8	3.58	3.33	1.21	0.07	2.42	22.4	4.63	1.49	2.59				14.4		60.5	371	8.8	186	8.07	2.86	289	27.6	51.5	5.43	19.2	2.77	0.67	2.06	0.283	1.57	0.3	0.956	0.157
Chen, Q., et al., 2017	XITG-01	208.9	1.1	30.2789	101.524			-4.1
Chen, Q., et al., 2017	XITG-02	208		30.295	101.531	0.708023	-7.15			64.3	0.6	15.3	5.5		0.09	2.39	4.95	1.67	3.55	0.14	16	92.9	50.2	13.4	14.4	18.9		66.1	17.7	2.38	153	242	24	179	11.6	12.9	576	62.6	110	12.5	43.9	6.78	1.04	5.89	0.76	4.46	0.93	2.54	0.38
Chen, Q., et al., 2017	XITG-03	208		30.295	101.531					62.8	0.67	15.9	5.92		0.1	2.91	4.96	1.77	3.33	0.15	17.8	105.9	56.1	15.6	17.3	11.2		72.5	19.3	2.2	160	261	20.3	165	13.3	11.2	583	33	66.5	7.67	27.9	5.09	1.03	4.75	0.66	3.91	0.82	2.26	0.33
Chen, Q., et al., 2017	XITG-04	208		30.295	101.531					62.1	0.66	16	6.08		0.11	3.02	5.06	1.69	3.72	0.15	18.3	107.2	54.3	15.1	16.1	9.2		69.8	18.8	2.22	163	253	21.4	162	12.9	8.1	656	36	68.1	7.61	27.3	4.97	1.01	5.15	0.69	4.08	0.86	2.35	0.35
Chen, Q., et al., 2017	XITG-05	208		30.295	101.531					61.6	0.68	16.1	6.15		0.1	3.02	5.24	1.76	3.48	0.15	17.6	104.2	54.6	15.4	15.8	11.2		69.4	18.9	2.21	161	251	21.5	191	13.2	8	599	38	70.9	7.5	26.8	4.87	1	4.81	0.68	4.11	0.85	2.38	0.36
Chen, Q., et al., 2017	XITG-06	208		30.295	101.531					62.6	0.69	15.8	6.29		0.11	3.11	5.05	1.82	3.16	0.16	18.6	104.5	48.6	15.7	16.3	11.5		72.2	19	1.99	158	255	23.3	176	13.3	12.4	527	34	68.8	8.14	30.3	5.77	1.04	5.01	0.74	4.44	0.92	2.55	0.38
Chen, Q., et al., 2017	XITG-07	208		30.295	101.531					62	0.66	15.7	6.07		0.11	2.95	5.25	1.81	3.33	0.15	17.6	107	55.4	15.8	16.3	12.3		72.1	19	2.54	160	255	23.4	150	13.1	12.1	589	57.6	108	12.1	42.8	6.74	1.04	5.71	0.76	4.41	0.93	2.52	0.37
Chen, Q., et al., 2017	XITG-08	208		30.295	101.531					62.2	0.66	16	5.96		0.1	2.91	5.27	1.77	3.47	0.14	16.6	101.8	52.3	15.3	15.5	12.3		70	18.6	2.25	160	261	20.4	148	12.5	12.4	589	38.3	74.5	8.5	31.3	5.42	1.03	4.73	0.66	3.93	0.81	2.21	0.33
Chen, Q., et al., 2017	XITG-09	208		30.295	101.531	0.708024	-7.26			62.9	0.65	16	5.84		0.1	2.89	5.18	1.76	3.49	0.15	16.7	99.7	54.2	15	15.4	11.6		68.8	18.4	2.38	158	260	21.1	180	12.6	11.8	624	47.7	91.7	10.2	36.6	5.94	1.05	5.06	0.69	4	0.84	2.29	0.34
Chen, Q., et al., 2017	XITG-10	209		30.295	101.531					58.2	0.84	16.8	7.73		0.14	3.84	6.17	1.97	3.02	0.16	25.2	134.6	49.5	20.3	18.1	26.9		88.6	21.2	2.68	197	226	28.7	194	17.8	13.9	396	27.1	57	6.96	28.1	6.02	0.93	5.67	0.89	5.45	1.16	3.19	0.47
Chen, Q., et al., 2017	XITG-11	209		30.295	101.531					56.7	0.92	17.2	8.49		0.15	4.2	6.24	2.02	3.1	0.17	28.1	145.5	47.6	22.2	19.5	35.4		96.3	21.8	2.83	206	220	35	170	19.5	14.4	373	23.2	48.4	6.16	25.7	6.2	0.88	6.01	1	6.36	1.36	3.79	0.57
Chen, Q., et al., 2017	XITG-12	209		30.295	101.531	0.70797	-7.08			57.4	0.89	16.7	8.25		0.15	4.11	6.32	2.06	2.87	0.16	26.8	142.3	48.3	21.4	18.1	52.5		93.6	21.2	2.67	203	219	27.4	176	18.6	14.4	332	22	48.7	5.81	24.1	5.49	0.87	5.13	0.84	5.23	1.1	3.05	0.45
Chen, Q., et al., 2017	XITG-14	209		30.295	101.531	0.707899	-7.49			65.8	0.54	15.1	4.93		0.09	2.39	4.32	1.73	4.09	0.12	14.8	83.6	48.2	12	12.8	6.22		58.2	17.1	2.14	181	224	26.9	206	11.9	13.7	549	42.5	82.5	9.58	34.9	6.27	0.93	5.62	0.81	4.93	1.05	2.98	0.45
Chen, Q., et al., 2017	XITG-15	209		30.2789	101.524					65.3	0.54	15.1	5.08		0.09	2.52	4.55	1.71	4.1	0.12	16.2	82.2	81.7	13	13.9	7.28		60.1	17.2	1.81	179	221	24.6	144	12	12.6	551	37.7	78.2	9.58	34.7	6.35	0.91	5.45	0.77	4.66	0.98	2.65	0.4
Chen, Q., et al., 2017	XITG-16	209		30.2789	101.524					64.9	0.56	15.2	5.19		0.09	2.53	4.46	1.74	4.02	0.13	15.4	89.9	49.9	13.2	14.3	7.23		61.9	17.7	2.29	184	224	24.8	162	12.7	13.3	554	38	76.4	9.01	32.5	5.9	0.93	5.31	0.78	4.7	0.98	2.72	0.41
Chen, Q., et al., 2017	XITG-17	209		30.2789	101.524					64.3	0.56	15.1	5.2		0.09	2.57	4.53	1.64	3.96	0.13	16.3	90.6	52	13.4	14.3	8.72		62.8	17.5	2.24	174	231	23.5	162	12.7	10.9	617	43.1	81.5	9.48	34.6	6.05	0.97	5.28	0.76	4.58	0.95	2.61	0.39
Chen, Q., et al., 2017	XITG-19	209		30.2789	101.524					65.2	0.51	15.2	4.69		0.09	2.32	4.66	1.73	4.03	0.13	15.5	83.9	43.9	12.6	12.6	6.8		57.7	17.2	2.2	176	228	22.7	195	11.4	13.7	551	48.5	92.1	10.5	37.8	6.25	0.94	5.32	0.73	4.3	0.91	2.45	0.37
Chen, Q., et al., 2017	XITG-20	209		30.2789	101.524	0.708153	-7.19			65.2	0.55	15.4	5.06		0.09	2.46	4.59	1.76	4.02	0.13	14.9	86	47.5	12.9	13.6	7.09		59.3	17.3	2.15	173	232	22.2	149	11.9	11.8	570	39.7	76.3	8.76	32.1	5.62	0.96	4.91	0.7	4.17	0.88	2.43	0.36
Chen, Q., et al., 2017	XITG-21	209		30.2789	101.524					65.5	0.54	15.4	4.84		0.08	2.31	4.33	1.84	4.06	0.12	13.5	82.9	43.1	13.3	13.2	5.79		57	17.5	2.12	179	231	25.4	170	11.9	13	582	40.8	78.5	9.07	33.1	5.95	0.94	5.25	0.76	4.67	0.99	2.8	0.42
Chen, Q., et al., 2017	XITG-24	209		30.2686	101.521	0.709616	-7.46			53.5	0.85	15.7	9.13		0.22	5.71	9.69	1.63	2.37	0.1	28.9	210	105	29.7	37.1	1202		97.2	19.1	2.91	130	217	33.6	128	14.2	11.7	361	16.5	39.2	5.85	26.6	6.7	0.8	6.28	1.06	6.73	1.4	3.81	0.56
Chen, Q., et al., 2017	XITG-25	209		30.2686	101.521					53.4	0.87	15.6	9.34		0.21	5.71	9.29	1.66	2.54	0.11	36.4	187	346	26.4	59.8	86.7		79.7	16.5	2.82	143	213	32.8	102	12.9	7.1	442	21.8	51.5	7.29	31.6	7.1	0.92	6.4	1.02	6.27	1.31	3.52	0.52
Chen, Q., et al., 2017	XITG-26	209		30.2686	101.521	0.708797	-7.29			53.4	0.86	15.6	9.27		0.21	5.66	9.32	1.64	2.51	0.11	33.2	212	101	26.8	35.7	1294		98.4	19.1	2.84	148	213	35.6	105	14.8	10.6	394	18.2	43.2	6.12	27.1	6.8	0.85	6.51	1.1	6.98	1.47	3.95	0.59
Chen, Q., et al., 2017	XITG-28	209		30.2686	101.521					55	0.62	13.7	8.24		0.17	7.18	8.91	1.4	3.43	0.18	32	187	347	27.8	62	89.8		76.2	16	2.83	142	222	28	93	9.3	8.1	355	38	79.6	9.72	37.2	6.96	0.92	6.09	0.89	5.44	1.14	3.1	0.46
Chen, Q., et al., 2017	XITG-29	209		30.2686	101.521	0.706722	-7.25			55.2	0.62	13.8	8.27		0.17	7.24	8.97	1.39	3.45	0.18	34.3	220	106	27.7	37.4	1406		98.7	19.5	2.95	172	218	35.6	114	15.2	12.1	413	25.8	59.7	7.81	32.2	7.39	0.85	6.79	1.1	6.93	1.43	3.91	0.58
Chen, Q., et al., 2017	XITG-30	208.2	1.2	30.295	101.531			-2.4
Chen, Q., et al., 2017	XITG-23	209.2	1.2	30.2686	101.521			-3.3
Chen, Q., et al., 2017	XITG-27	208.7	1.2	30.2686	101.521			-3.8
Chen, S., et al., 2015	AD1309-12	220	2.1	32.273	91.7176	0.70555	8.54			46.75	14.7	1.1	6.87	5.17	0.12	7.23	10.86	2.86	0.07	0.1	42.94	393.7	90.99	31.16	57.47	19.04		44.05	20.51		1.39	250.6	35.76	62.44	1.03	0.17	11.8	1.78	6.64	1.35	8.22	2.93	1.18	3.85	0.9	6.11	1.38	4.01	0.76
Chen, S., et al., 2015	AD1309-17	220		32.273	91.7176	0.70503	8.33			49.96	13.22	1.34	5.09	7.98	0.22	6.88	8.35	3.33	0.26	0.08	45.68	379	82.65	50.18	44.38	22.61		81.99	17.97		4.28	100.9	32.45	65.62	1.57	4.35	47.22	1.96	6.57	1.24	7.43	2.72	1.07	3.48	0.84	6.07	1.32	3.83	0.72
Chen, S., et al., 2015	AD1309-22	220		32.273	91.7176					50.11	13.52	1.29	4.96	6.87	0.13	7.36	8.01	3.69	0.21	0.08	40.51	315.5	64.08	41.49	59.15	10.52		32.76	15.82		2.93	106.4	30.89	62.47	1.26	1.61	39.42	1.77	6.06	1.12	6.72	2.72	1.04	3.19	0.78	5.63	1.23	3.69	0.68
Chen, S., et al., 2015	AD1309-23	220		32.273	91.7176	0.70457	7.53			50.49	13.04	1.45	4.25	8.89	0.21	6.47	8.47	3.47	0.26	0.1	39.68	352.8	72.86	40.72	36.7	15.59		58.77	16.13		4.17	82.11	36.04	74.76	1.66	2	31.25	2.38	7.92	1.5	8.4	3.09	1.26	3.95	0.96	6.71	1.49	4.2	0.78
Chen, S., et al., 2015	AD1309-25	220		32.273	91.7176	0.70438	7.53			49.91	13.48	1.45	4.44	9.01	0.17	7.22	6.63	4.03	0.17	0.1	39.37	340.4	64.96	42.54	46.5	13.01		67.06	15.16		2.81	66.74	34.13	73.19	1.46	0.68	15.98	2.18	7.13	1.36	7.97	3.03	0.98	3.86	0.9	6.53	1.37	3.96	0.72
Chen, S., et al., 2015	AD1309-27	220		32.273	91.7176	0.70498	7.27			50.81	13.12	1.38	4.72	8.38	0.19	6.79	7.91	3.73	0.11	0.09	39.44	339	66.27	42.88	36.65	13.76		69.94	14.73		2.27	65.89	34.43	74.17	1.58	0.35	24.92	2.46	7.79	1.47	8.26	3.11	1.2	3.69	0.92	6.51	1.37	3.95	0.75
Chen, S., et al., 2015	AD1311-3	229		32.3265	92.0782					48.49	16.46	0.84	1.6	6.63	0.14	9.11	6.58	4.5	0.14	0.12	32.89	287.7	317.97	38.83	168.83	31.55		65.02	16.65		2.62	98.87	19.32	77.44	2.11	1.73	29.32	5.95	15.17	2.31	10.61	2.72	0.91	2.69	0.6	3.61	0.75	2.2	0.41
Chen, S., et al., 2015	AD1311-5	229		32.3265	92.0782					49.09	16.41	0.83	1.74	6.44	0.13	9.36	6.43	4.37	0.14	0.12	33.36	243.3	323.73	36.98	158.65	40.3		62.13	14.44		1.76	153.4	19.4	73.13	1.94	1.19	37.43	5.93	15.83	2.38	11.36	2.92	0.95	2.97	0.59	3.8	0.75	2.17	0.4
Chen, S., et al., 2015	AD1311-A	229		32.3265	92.0782					50.4	15.79	0.78	1.95	5.72	0.13	8.01	6.31	5.07	0.26	0.11	29.25	213.3	289.8	34.38	157.83	138.24		60.54	12.33		2.62	278.6	18.54	67.79	1.81	1.05	57.54	5.83	15.2	2.29	10.54	2.83	1.05	2.79	0.58	3.7	0.73	2.12	0.4
Chen, S., et al., 2015	AD1311-B1	229		32.3265	92.0782					47.82	16.86	0.88	2.03	6.35	0.14	8.88	7.45	4.09	0.13	0.12	35.76	308	350.73	40.99	180.41	27.64		65.55	18.5		1.27	87.09	19.42	72.51	2.23	2.07	27.77	5.77	15.06	2.3	10.8	2.75	0.85	2.7	0.58	3.54	0.76	2.2	0.4
Chen, S., et al., 2015	AD1311-C	229		32.3265	92.0782					50.86	16.03	0.8	1.64	5.77	0.13	8.08	6.21	5.19	0.12	0.11	30.76	244.1	299.61	35.52	156.2	59.44		60.23	13.53		0.93	157.4	18.56	77.18	1.85	0.93	37.17	5.9	15.49	2.33	11.01	2.77	0.85	2.67	0.57	3.54	0.77	2.08	0.38
Chen, S., et al., 2015	AD1311-D1	229		32.3265	92.0782	0.70533	6.79			46.23	16.4	0.86	1.5	6.68	0.15	6.31	9.1	4.72	0.3	0.14	32.5	235.4	309.42	35.41	113.09	13.83		71.85	12.84		4.07	293.3	19.43	76.69	2.02	1.28	57.61	6.01	14.67	2.33	10.74	2.73	0.74	2.66	0.54	3.58	0.78	2.19	0.38
Chen, S., et al., 2015	AD1311-E	229		32.3265	92.0782	0.70536	4.37			47.33	14.79	0.76	1.41	6.59	0.16	7.25	10.34	4.4	0.1	0.11	30.64	253.5	273.69	35.4	155.03	102.22		60.14	15.25		0.81	82.87	18.86	64.06	1.85	1.09	16.39	5.85	14.68	2.2	10.39	2.6	0.95	2.75	0.57	3.6	0.76	2.23	0.38
Chen, S., et al., 2015	AD1312-11	229		32.3265	92.0782	0.70575	4.81			49.34	19.79	0.99	1.6	8.36	0.22	6.42	1.04	5.8	0.46	0.18	35.95	223.3	291.69	44.56	88.57	19.74		103.4	16.85		9.72	197.4	15.3	80.46	2.47	1.05	37.76	6.73	12.58	2.17	10	2.45	0.8	2.26	0.47	3.3	0.63	1.82	0.35
Chen, S., et al., 2015	AD1312-15	229		32.3265	92.0782	0.70519	5.72			48.18	18.32	0.98	2.09	7.19	0.15	5.9	4.48	5.41	0.58	0.19	30.37	197.8	309.51	38.2	76.39	18.2		87.14	13.39		5.97	192.3	20.84	78.29	2	0.87	106.3	4.31	10.05	1.85	9.14	2.53	0.61	2.62	0.6	4.05	0.84	2.42	0.45
Chen, S., et al., 2015	AD1312-8	228.6	1.6	32.3265	92.0782	0.70463	4.34			47.21	20.77	1.05	1.65	8.96	0.15	6.21	1.5	4.57	1.64	0.19	42.59	255	380.88	50.45	77.83	19.06		112.61	18.82		38.27	204.1	20.31	84.21	2.69	3.39	80.17	11.97	20.91	3.61	15.89	3.66	0.96	3.33	0.68	4.13	0.83	2.31	0.43
Chen, S., et al., 2017	14AD01-1	80.4	0.5	32.3167	91.6833	0.70709	-3.1			60.31	1	18.4	3.75	0.63	0.07	1.3	4.52	4.99	3.75	0.47	10.57	130.08	11.8	7.94	4.5	28		88.74	23.61		117	715.5	24.9	290.2	25.9	3.46	935	91.1	171	18.5	58.6	11.5	2.36	8.7	1.1	5.09	0.95	2.44	0.41
Chen, S., et al., 2017	14AD01-10	80		32.3167	91.6833	0.707077	-3.07			60.3	0.99	18.27	3.96	0.62	0.07	1.21	4.54	4.94	3.78	0.47	9.48	104.24	6.98	7.47	3.69	24		80.1	21.47		118	776.3	26.1	275.7	23.6	2.96	945	96.7	182	20.8	64.8	12.18	2.28	9.68	1.36	5.35	0.94	2.62	0.37
Chen, S., et al., 2017	14AD01-11	80		32.3167	91.6833					60.41	0.99	18.05	3.89	0.75	0.05	1.57	4.07	4.75	3.78	0.47	9.45	101.71	7.04	9.1	4.02	25		80.49	21.2		120	783.2	28.5	275.1	23.9	2.66	1047	111	214	23.1	72.1	11.48	2.99	10.17	1.4	5.88	1.11	2.86	0.45
Chen, S., et al., 2017	14AD01-12	80		32.3167	91.6833					59.15	1	17.91	6.59	0.6	0.08	1.57	2.99	4.88	3.88	0.46	8.25	89.84	5.71	8.79	3.9	24		59.61	19.39		87	617.9	27.8	276	22.1	2.68	941	97.4	189	20.4	64	12.34	2.76	9.55	1.26	5.35	1	2.88	0.36
Chen, S., et al., 2017	14AD01-13	80		32.3167	91.6833					59.77	1	17.94	4.65	0.64	0.05	1.52	3.91	4.88	3.9	0.46	8.12	94.74	5.01	9.41	3.81	26		74.02	20.84		70	723.9	27.9	286.4	23.4	2.44	1015	93.8	186	20.4	62.1	10	2.44	9.4	1.21	5.05	1.06	2.61	0.47
Chen, S., et al., 2017	14AD01-14	80		32.3167	91.6833					59.65	1.01	18.38	4.79	0.42	0.07	0.64	2.28	5.66	5.11	0.47	5.54	87.74	4.47	7.49	3.28	20		48.45	17.81		49	214.8	30.3	276.4	18.6	1.46	1232	100.1	198	21.7	67.2	11.48	3.05	10.76	1.28	5.8	1.21	2.93	0.44
Chen, S., et al., 2017	14AD01-15	80		32.3167	91.6833	0.707341	-3.1			60.74	1.03	18.37	3.94	0.75	0.07	1.46	4.09	4.83	3.78	0.47	8.46	99.32	5.72	10.78	4.33	27		88.83	22.21		68	834.6	23.1	284.1	26.3	2.63	1081	88.7	170	18.7	59	10.75	2.16	8.7	1.16	4.51	0.87	2.39	0.33
Chen, S., et al., 2017	14AD01-2	80		32.3167	91.6833	0.707078	-3.21			59.92	0.98	18.11	4.35	0.54	0.08	1.23	3.99	5.06	3.74	0.46	10.36	110.62	7.15	10.2	4.28	25		83.39	21.77		119	694.2	28	275.9	23.7	2.9	1058	94.3	185	20.4	63.8	11.25	2.44	8.97	1.12	5.25	1.08	2.55	0.42
Chen, S., et al., 2017	14AD01-3	80		32.3167	91.6833	0.707051	-2.93			57.96	1	18.21	4.86	0.66	0.07	1.82	3.28	5.14	4.42	0.47	9.75	109.94	8.06	12.41	4.16	24		78.9	21.47		106	466.4	27.4	266.4	23.1	2.13	1183	86.6	175	19.2	61.4	11.73	2.33	9.45	1.17	4.62	0.97	2.61	0.41
Chen, S., et al., 2017	14AD01-4	80		32.3167	91.6833					60.11	0.99	18	4.28	0.73	0.05	1.77	3.92	5.07	3.45	0.45	7.48	79.43	1.9	9.23	3	23		75.8	20.39		45	619.4	28	273.4	24.1	1.86	907	101.4	193	20.8	66	10.4	2.68	9.18	1.14	5.7	1.02	2.59	0.36
Chen, S., et al., 2017	14AD01-5	80		32.3167	91.6833					59.46	1.01	17.93	4.65	0.69	0.05	1.77	3.39	4.86	4.08	0.46	9.91	101.29	6.96	9.95	3.89	29		74.86	21.06		103	596	25.8	281.2	23.3	2.55	1087	88	167	18.1	58.7	11.78	2.45	8.96	1.17	4.74	0.86	2.4	0.37
Chen, S., et al., 2017	14AD01-6	80		32.3167	91.6833	0.707204	-3			60.47	0.99	18.34	3.96	0.86	0.03	1.55	3.39	4.9	3.84	0.46	9.18	96.98	5.75	9.69	4.55	24		82.71	20.85		95	647.7	28	274.2	23.6	2.34	921	101.1	199	20.9	67.9	10.67	2.87	9.82	1.32	5.76	1.1	2.89	0.42
Chen, S., et al., 2017	14AD01-7	80		32.3167	91.6833	0.70715	-3.02			59.64	0.98	17.96	4.29	0.55	0.07	1.26	4.23	5.04	3.72	0.46	9.22	110.66	7.61	10.51	4.16	25		83.98	21.71		96	600.6	27.5	271.8	23.8	2.7	900	96.3	189	20.5	64.9	9.62	2.55	8.76	1.32	5.46	0.97	2.73	0.46
Chen, S., et al., 2017	14AD01-8	80		32.3167	91.6833					59.65	0.99	18.04	4.72	0.59	0.05	1.8	3.39	4.94	3.96	0.46	8.98	113.5	9.06	9.7	3.74	31		67.44	21.42		91	615.8	27.9	274.7	22.4	2.36	998	99.7	195	20.6	65.9	9.22	2.48	10.04	1.3	5.38	1.01	2.69	0.42
Chen, S., et al., 2017	14AD01-9	80		32.3167	91.6833					60.09	0.99	17.95	4.11	0.59	0.06	1.2	4	5.05	3.84	0.46	10.3	115.8	8.61	11.45	5.49	28		94.27	23.5		105	708.4	25.1	278.7	26.4	3.06	1116	88.2	175	18.8	59.3	11.48	2.53	8.19	1.12	5.04	0.85	2.48	0.38
Chen, S., et al., 2017a	NQ1306-A	105.5	1.3	31.4388	92.0942			-7.29091		63.76	0.75	16.31	6.36	0.23	0.06	1.03	0.63	5.55	3.24	0.21	14.42	175.7	17.87	10.53	12.85	13.94		55.75	15.96		99.92	174.1	20.02	195.66	13.43	1.68	702.5	28.53	63.86	7.32	27.25	5.14	1.17	4.48	0.75	4.11	0.81	2.41	0.44
Chen, S., et al., 2017a	NQ1306-B	105.5	1.3	31.4178	92.1053					58.45	0.75	16.38	4.9	0.39	0.13	1.48	5.11	3.17	2.29	0.23	15.79	125.6	11.68	15.48	11.25	17.15		69.95	18.79		107.81	137.5	28.23	202.98	15.69	5.39	195.4	40.94	79.33	9.64	37.2	7.33	1.98	6.92	1.09	5.82	1.03	2.87	0.48
Chen, S., et al., 2017a	NQ1306-C	105.5	1.3	31.4102	92.12					64.46	0.72	15.68	6.74	0.12	0.07	1.31	0.73	4.54	3.38	0.21	14.75	51.83	11.37	16.6	11.95	12.94		71.44	18.26		127.78	224.4	17.85	180.49	14.78	2.25	675.4	30.6	63.8	7.22	25.68	4.66	1.14	4.18	0.65	3.45	0.71	2.06	0.36
Chen, S., et al., 2017a	NQ1306-D	105.5	1.3	31.5688	92.4494					62.37	0.71	16.29	6.72	0.11	0.09	1.89	0.9	4.87	3.31	0.21	12.81	52.91	10.17	15.15	11.18	12.4		76.54	17.72		101.9	187.2	19.43	188.53	14.75	1.98	582.9	36.19	70.97	7.93	29.06	5.25	1.25	4.57	0.71	3.83	0.76	2.14	0.4
Chen, S., et al., 2017a	NQ1306-E	105.5	1.3	31.5849	92.4847					64.15	0.67	14.19	6.18	0.18	0.1	1.57	2.98	2.65	1.85	0.19	14.91	93.13	10.41	14.74	5.96	11.8		71.57	16.08		92.23	95.44	23.29	178.13	13.86	6.33	123.8	33.7	65.92	7.76	29.16	5.69	1.38	5.25	0.84	4.62	0.9	2.33	0.43
Chen, S., et al., 2017a	NQ1306-F	105.5	1.3	31.57	92.46					59.63	0.63	13.37	6.16	0.11	0.22	1.38	6.17	2.55	1.97	0.18	12.58	58.77	10.74	13.24	10.09	10.54		62.58	14.91		96.03	101.7	25.73	165.55	13.03	6.14	115.6	32.3	64.16	7.51	28.76	5.8	1.46	5.18	0.92	4.99	0.93	2.58	0.45
Chen, S., et al., 2017a	NQ1307-A	104.4	1.2	31.3088	92.7127	0.704177	-4.81	-0.55		71.5	0.26	13.76	3.11	0.25	0.01	0.56	0.14	1.91	7.26	0.05	6.96	18.47	10.73	1.53	5.07	4.71		44.29	27.17		416.06	63.2	44.72	343.52	39.16	13.26	203.8	76.84	134.1	16.83	58.09	10.08	0.39	8.7	1.48	8.36	1.65	4.91	0.93
Chen, S., et al., 2017a	NQ1307-B	104.4	1.2	31.3014	92.6982	0.70477	-4.74			71.04	0.26	12.82	4.39	0.2	0.01	0.31	0.18	1.28	8.52	0.06	5.06	13.82	8.62	1.33	4.29	4.37		25.09	17.47		371.9	43.08	35.35	435.49	35.8	9.72	611	53.85	111.6	13.12	46.22	8.25	0.32	7.68	1.22	7.01	1.4	4.27	0.85
Chen, S., et al., 2017a	NQ1307-C	104.4	1.2	31.2943	92.6831	0.709574	-5.03			73.95	0.23	13.08	2.22	0.19	0.01	0.19	0.21	3.24	5.95	0.05	5.02	11.45	8.18	0.9	4.06	4.27		27.92	20.77		303.55	48.8	61.9	347.8	41.13	5.61	107.9	64.89	166	15.65	54.76	10.34	0.36	9.81	1.86	11.41	2.34	6.9	1.02
Chen, S., et al., 2017a	NQ1307-D	104.4	1.2	31.2789	92.6533	0.706976	-5.17			73.19	0.26	13.21	2.62	0.17	0.01	0.19	0.16	2.84	6.58	0.05	6.14	15.86	8.81	1.29	4.27	4.09		28.06	21.17		341.18	56.13	61.27	421.85	39.78	6.95	135.6	82.4	174.1	19.14	67.47	12.23	0.44	11.63	2	11.43	2.32	6.55	0.96
Chen, S., et al., 2017a	NQ1307-E	104.4	1.2	31.2735	92.6516	0.70819	-4.88			75.18	0.16	12.14	2.44	0.13	0.01	0.22	0.14	2.31	6.43	0.03	3.65	14.93	9.98	0.57	3.91	6.03		27.18	16.39		286.75	52.02	58.3	289.04	36.47	6.41	140.3	71.07	145.4	16.51	56.98	10.11	0.33	9.35	1.67	10.19	2.15	6.57	0.96
Chen, S., et al., 2017b	14AD01-1	80.42	0.45	32.3167	91.6167	0.70709	-3.1			60.31	1	18.4	3.75	0.63	0.07	1.3	4.52	4.99	3.75	0.47	10.57	130.08	11.8	7.94	4.5	28		88.74	23.61		117	715.5	24.9	290.2	25.9	3.46	935	91.1	171	18.5	58.6	11.5	2.36	8.7	1.1	5.09	0.95	2.44	0.41
Chen, S., et al., 2017b	14AD01-10	80		32.3167	91.6167	0.707077	-3.07			60.3	0.99	18.27	3.96	0.62	0.07	1.21	4.54	4.94	3.78	0.47	9	104	6.98	7	4	24		80.1	21.47		118	776.3	26.1	275.7	23.6	3	945	96.7	182	20.8	64.8	12.18	2.28	10	1	5	1	3	0.37
Chen, S., et al., 2017b	14AD01-11	80		32.3167	91.6167					60.41	0.99	18.05	3.89	0.75	0.05	1.57	4.07	4.75	3.78	0.47	9	102	7.04	9	4	25		80.49	21.2		120	783.2	28.5	275.1	23.9	3	1047	111	214	23.1	72.1	11.48	2.99	10	1	6	1	3	0.45
Chen, S., et al., 2017b	14AD01-12	80		32.3167	91.6167					59.15	1	17.91	6.59	0.6	0.08	1.57	2.99	4.88	3.88	0.46	8	90	5.71	9	4	24		59.61	19.39		87	617.9	27.8	276	22.1	3	941	97.4	189	20.4	64	12.34	2.76	10	1	5	1	3	0.36
Chen, S., et al., 2017b	14AD01-13	80		32.3167	91.6167					59.77	1	17.94	4.65	0.64	0.05	1.52	3.91	4.88	3.9	0.46	8.12	95	5	9	4	26		74.02	20.84		70	723.9	27.9	286	23	2	1015	93.8	186	20.4	62.1	10	2	9	1	5	1.06	3	0
Chen, S., et al., 2017b	14AD01-14	80		32.3167	91.6167					59.65	1.01	18.38	4.79	0.42	0.07	0.64	2.28	5.66	5.11	0.47	5.54	88	4	7	3	20		48.45	17.81		49	214.8	30.3	276	19	1	1232	100.1	198	21.7	67.2	11	3	11	1	6	1.21	3	0
Chen, S., et al., 2017b	14AD01-15	80		32.3167	91.6167	0.707341	-3.1			60.74	1.03	18.37	3.94	0.75	0.07	1.46	4.09	4.83	3.78	0.47	8.46	99	6	11	4	27		88.83	22.21		68	834.6	23.1	284	26	3	1081	88.7	170	18.7	59	11	2	9	1	5	0.87	2	0
Chen, S., et al., 2017b	14AD01-2	80		32.3167	91.6167	0.707078	-3.21			59.92	0.98	18.11	4.35	0.54	0.08	1.23	3.99	5.1	3.74	0.5	10.36	110.62	7.15	10.2	4.28	25		83.39	21.77		119	694.2	28	275.9	23.7	2.9	1058	94.3	185	20.4	63.8	11.3	2.44	8.97	1.12	5.25	1.08	2.55	0.42
Chen, S., et al., 2017b	14AD01-3	80		32.3167	91.6167	0.707051	-2.93			57.96	1	18.21	4.86	0.66	0.07	1.82	3.28	5.14	4.42	0.47	9.75	109.94	8.06	12.41	4.16	24		78.9	21.47		106	466.4	27.4	266.4	23.1	2.13	1183	86.6	175	19.2	61.4	11.73	2.33	9.45	1.17	4.62	0.97	2.61	0.41
Chen, S., et al., 2017b	14AD01-4	80		32.3167	91.6167					60.11	0.99	18	4.28	0.73	0.05	1.77	3.92	5.07	3.45	0.45	7.48	79.43	1.9	9.23	3	23		75.8	20.39		45	619.4	28	273.4	24.1	1.86	907	101.4	193	20.8	66	10.4	2.68	9.18	1.14	5.7	1.02	2.59	0.36
Chen, S., et al., 2017b	14AD01-5	80		32.3167	91.6167					59.46	1.01	17.93	4.65	0.69	0.05	1.77	3.39	4.86	4.08	0.46	9.91	101.29	6.96	9.95	3.89	29		74.86	21.06		103	596	25.8	281.2	23.3	2.55	1087	88	167	18.1	58.7	11.78	2.45	8.96	1.17	4.74	0.86	2.4	0.37
Chen, S., et al., 2017b	14AD01-6	80		32.3167	91.6167	0.707204	-3			60.47	0.99	18.34	3.96	0.86	0.03	1.55	3.39	4.9	3.84	0.46	9.18	96.98	5.75	9.69	4.55	24		82.71	20.85		95	647.7	28	274.2	23.6	2.34	921	101.1	199	20.9	67.9	10.67	2.87	9.82	1.32	5.76	1.1	2.89	0.42
Chen, S., et al., 2017b	14AD01-7	80		32.3167	91.6167	0.70715	-3.02			59.64	0.98	17.96	4.29	0.55	0.07	1.26	4.23	5.04	3.72	0.46	9.22	110.66	7.61	10.51	4.16	25		83.98	21.71		96	600.6	27.5	271.8	23.8	2.7	900	96.3	189	20.5	64.9	9.62	2.55	8.76	1.32	5.46	0.97	2.73	0.46
Chen, S., et al., 2017b	14AD01-8	80		32.3167	91.6167					59.65	0.99	18.04	4.72	0.59	0.05	1.8	3.39	4.94	3.96	0.46	9	114	9.06	10	4	31		67.44	21.42		91	615.8	27.9	274.7	22.4	2	998	99.7	195	20.6	65.9	9.22	2.48	10	1	5	1	3	0.42
Chen, S., et al., 2017b	14AD01-9	80		32.3167	91.6167					60.09	0.99	17.95	4.11	0.59	0.06	1.2	4	5.05	3.84	0.46	10	116	8.61	11	5	28		94.27	23.5		105	708.4	25.1	278.7	26.4	3	1116	88.2	175	18.8	59.3	11.48	2.53	8	1	5	1	2	0.38
Chen, W., et al., 2017	GZ	103.8	0.46	32.525	84.3167
Chiu et al., 2009	ET014C	58.7	3.1	30.11	95.07			-8.74167
Chiu et al., 2009	ET103B	118.6	2		95.3845			-11.825
Chiu et al., 2009	ET104A	114.8	1.7	29.5075	96.6044			-2.29
Chiu et al., 2009	ET106A	122.5	1.5	29.3855	96.869			-10.57
Chiu et al., 2009	ET113B	59.1	3.2	28.5616	97.0852			-12.6842
Chiu et al., 2009	ET115E	133.1	1.3	28.5991	97.2496			-6.73083
Chiu et al., 2009	ET116A	132.6	9	28.6724	97.4698			-10.795
Chiu et al., 2009	ET117B	116.9	1.8	29.3213	97.1343			-0.9225
Chiu et al., 2009	ET120B	109	1.1	29.7417	96.0209			0.25
Chiu et al., 2009	ET122E	66.1	1.1	29.7649	95.6971			0.636667
Chiu et al., 2009	ET125B	125.1	1.5	29.7565	95.7163			-10.9343
Chiu et al., 2009	ET207A	56.5	0.4	28.5639	97.0865			-13.137
Chiu et al., 2009	ET210A	130.4	0.7	28.6191	97.3661			-7.95556
Chiu et al., 2009	ET215A	132.9	0.8	28.9849	97.4034			-10.4877
Chiu et al., 2009	ET218A	122.5	0.8	29.3855	96.8683			-5.34211
Chiu et al., 2009	ET219A	125	0.6	29.3922	96.8515			-7.56545
Chiu et al., 2009	ET223A	197.7	1.5	29.869	96.6869			-8.15176
Chiu et al., 2009	ET224A	130	0.9	29.9001	96.682			-8.55143
Chiu et al., 2009	ET225A	124	0.8	30.0058	96.6893			-7.88722
Chiu et al., 2009	ET226A	125.3	0.7	30.0321	96.7252			-8.44778
Chiu et al., 2009	ET227A	122.7	0.7	30.0383	96.7868			-9.05524
Chiu et al., 2009	ET227C	127.6	0.6	30.0383	96.7868			-6.25056
Chiu et al., 2009	ET234A	114.8	0.7	29.7649	96.7096			-2.76313
Chiu et al., 2009	ET234C	115.7	0.6	29.7649	96.7096			-4.53952
Chu et al., 2006	ST104A	60.1	2	29.27	91.81	0.705043	1.9			65.58	0.43	16.57	3.99		0.07	1.71	4.25	3.21	2.7	0.1	13.8	116	11.9	10.1	4.6	17.8		47.4	15.5		69.2	336	12.3	107	3.88	3.68	446	13.5	26.5	2.96	11.7	2.3	0.75	2.1	0.34	2.01	0.41	1.22	0.2
Chu et al., 2006	ST134A	188.1	1.4	29.52	89.62	0.705203	5.5	14.59		72.37	0.3	15.07	2.09		0.08	0.65	2.14	4.15	2.36	0.06	12	64	2.9	3.3	1	6.7		37	13.1		65.1	458	14.7	141	5.08	2.19	561	15.4	28.6	3.03	11.4	2.25	0.74	2.17	0.37	2.28	0.49	1.49	0.24
Chu et al., 2006	T006B	141.3	2	29.99	93.04					72.65	0.33	14.06	2.39		0.04	0.57	1.99	2.56	3.74	0.09	19.1	8.2	13.5	3.2	5.9	1.2		26	15.1		153	242	25.5	220	13.9	5.33	507	39.6	76.9	8.33	31	5.95	1.15	5.24	0.8	4.41	0.89	2.57	0.39
Chu et al., 2006	T006C	141.3	2	29.99	93.04	0.713394	-9.4	-6.82273		67.29	0.64	15.4	4.3		0.06	1.24	4.69	2.31	1.89	0.44	18	45	17.5	7.2	6	0.43		61	18.7		107	315	32	295	14.1	6.11	272	79.3	152	16.1	59.2	9.94	1.63	8.63	1.23	6.37	1.2	3.15	0.4
Chu et al., 2006	T109A	202.74	2	30.09	89.13	0.713288	-9.3			74.43	0.3	15.49	0.34		0.01	0.45	1.2	5.08	1.26	0.16	4.9	58	4.3	0.4	0.6	3.68		28	19.6		73.2	318	13.8	142	12.9	5.78	82.3	32.7	72.2	8.57	33.1	6.6	0.57	4.7	0.58	2.35	0.37	0.95	0.12
Chu et al., 2006	T109B	202.74	2	30.09	89.13			-7.51		73.09	0.16	15.16	0.84		0.01	0.11	1.04	2.15	6.99	0.19	16.1	70	2.5	0.5	0.2	2.87		9	21.2		360	56.9	8.1	65	16.1	14.7	140	9.57	20.6	2.83	11.1	2.9	0.33	2.32	0.33	1.34	0.2	0.51	0.074
Chu et al., 2011	ET021D	64.6	2.5	29.69	91.63		4			71.6																															10.6	1.81
Chu et al., 2011	ET021E	64	1.4	29.69	91.63		3.4			55.1																															16.1	3.68
Chu et al., 2011	ET023	17	0.5	29.61	91.6		-0.5	8.2		65.3																															22.5	3.96
Chu et al., 2011	ET025E	13.2	0.4	29.69	91.75		-5.7	6.3		66.8																															19.8	3.22
Chu et al., 2011	ET026C	16.6	0.4	29.48	90.87		0.5	9.7		65.4																															19.9	3.35
Chu et al., 2011	ET026I	46.4	1	29.48	90.87		2.7	10.8		66.5																															16.3	3.07
Chu et al., 2011	ST043A	50.4	1.2	29.45	88.23		1.2	6.9		63.6																															23	4.48
Chu et al., 2011	ST107A	30.3	0.6	29.27	91.89		-2.5	4.4		65.3																															36	5.3
Chu et al., 2011	ST107B	31	0.5	29.27	91.89		-3	3		57.5																															47.1	6.63
Chu et al., 2011	ST134A	188.1	1.4	29.52	89.62		5.9	13.5		72.4																															11.4	2.25
Chu et al., 2011	ST141A	90.5	2.5	29.4	89.09		3.9	12.2		50.6																															20	4.36
Chu et al., 2011	ST143A	84.8	1.6	29.31	89.81		4.7	12		57.6																															19.2	4.07
Chu et al., 2011	ST144A	85.2	1.4	29.32	89.94		4.8	13.3		59.3																															20.8	4.44
Chu et al., 2011	ST147A	50.6	0.7	29.4	90.18		4.2	12.1		53.9																															20.8	4.47
Chu et al., 2011	ST152A	52.7	1.4	29.33	90.69		4.6			49.8																															10.6	2.63
Chu et al., 2011	ST162	10		29.88	86.72		-11.8	-11.4		74																															27.7	4.5
Chu et al., 2011	ST163	10		29.91	86.71		-13.6	-14.9		63.5																															100	19.4
Chu et al., 2011	ST164	10		29.92	86.69		-13.8	-17.6		55.5																															190	37.4
Chu et al., 2011	ST166A	10		29.97	86.61		-12.7	-13.8		50.2																															167	32.3
Chu et al., 2011	ST166B	10		29.97	86.61		-12.6	-16.6		50.8																															162	31.2
Chu et al., 2011	T016	26.2	0.5	29.57	94.58		-3.4	1.9		63.5																															39.3	5.6
Chu et al., 2011	T024	80.4	1.1	29.14	93.75		2.3	10.6		69.5																															10.2	1.62
Chu et al., 2011	T027	82.7	1.6	29	93.32		2.2	9.2		66.5																															14.4	2.51
Chu et al., 2011	T036C	102.2	2.4	29.32	90.31		3.1	12.3		56.6																															32.7	6.55
Chu et al., 2011	T044E	48.3	1.2	29.49	89.08		4.1	11.9		52.1																															20.5	4.46
Chu et al., 2011	T060B	15.1	0.3	29.52	90.04		-3.3	2.5		66																															28.2	4.58
Chu et al., 2011	T076	59.3	1.8	29.67	91.22		1.9			69.9																															21.9	3.81
Chu et al., 2011	T081	18.4	0.8	29.32	88.85		-4.7	2.7		60.6																															14.4	2.79
Chu et al., 2011	T153	49.9	0.9	30.13	85.41		-1.4	-0.1		53.4																															50.2	9.28
Chu et al., 2011	T201A	50	1.6	29.35	90.73					51.4
Chu et al., 2011	T201B	50.7	1.9	29.35	90.73					62.1
Chu et al., 2011	T228A	55	2	29.76	94.01		-5.1	-4.1		73.3																															19.6	4.5
Chung (1997)	85-142	31.4	0.5	33.9	91.8
Chung (1997)	EDG-1	37.3	1	33.9	91.8
Chung et al., 2003	ET025B	15	0.4	29.69	91.75					67.32	0.45	14.43	1.14		0.03	1.26	1.85	3.15	5.69	0.05											337	360	8.3	129	6.94		748	26.8	50.8	5.43	19.6	3.09	0.79	2.43	0.27	1.24	0.21	0.6	0.083
Chung et al., 2003	ET025E	13.2	0.4	29.69	91.75					66.76	0.33	15.16	2.07		0.06	0.93	2.7	3.63	3.43	0.14											159	689	6.9	102	4.28		823	24.4	47.7	5.3	19.8	3.22	0.87	2.43	0.27	1.25	0.21	0.6	0.081
Chung et al., 2003	ET026C	16.6	0.4	29.48	90.87					65.41	0.51	16.25	3.19		0.05	1.29	3.47	4.25	2.78	0.17											66.8	902	6.4	108	2.93		713	21.3	43.8	5.08	19.9	3.35	0.95	2.53	0.28	1.24	0.2	0.54	0.066
Chung et al., 2003	ET026D	16.4	1.8	29.48	90.87					63.62	0.55	16.32	2.75		0.03	1.04	3.4	4.61	2.71	0.21											61.4	1051	5.6	85	3.1		1032	21.6	46.7	5.64	22.4	3.67	1.06	2.59	0.27	1.13	0.19	0.52	0.06
Chung et al., 2003	T041D	15	0.6	29.36	88.81					56.73	0.83	17.17	5.83		0.08	3.31	5.54	4.11	1.72	0.27											30.5	911	9.5	99	3.8		490	17.8	40.1	5.12	21.8	4.19	1.21	3.46	0.43	2.03	0.35	0.93	0.12
Chung et al., 2003	T065C	13	3	29.74	89.88					57.47	0.66	15.41	4.67		0.05	2.39	5.29	3.6	2.71	0.26											81.3	1121	9	123	4.66		1008	37.6	75.8	8.93	35	5.79	1.58	4.36	0.45	1.95	0.31	0.82	0.097
Chung et al., 2003	T081	18.4	0.8	29.32	88.85					60.57	0.62	16.18	3.97		0.05	2.25	3.68	5.35	2.01	0.18											48.2	1004	7.1	101	3.64		689	13.1	28.4	3.47	14.4	2.79	0.84	2.23	0.29	1.33	0.22	0.59	0.073
Chung et al., 2009	ET023	17	0.5	29.61	91.6			9.24		65.27	0.53	16.81	3.52		0.03	1.53	3.53	4.19	2.95	0.19											85.9	1048	8.2	89	3.67		755	21.9	45.9	5.51	22.5	3.96	0.99	2.81	0.31	1.56	0.27	0.72	0.097
Chung et al., 2009	ST107A	30.3	0.6	29.27	91.89			5.31
Chung et al., 2009	T016	26.2	0.5	29.57	94.58			1.27		63.48	0.61	18.75	3.38		0.04	1.05	3.98	4.57	1.89	0.2											78.7	921	5.4	210	3.01		537	52.9	104	11.2	41.3	5.68	1.26	3.44	0.27	1.02	0.13	0.52	0.08
Chung et al., 2009	T060B	15.1	0.3	29.52	90.04			4.43
Copeland et al., 1987	M369-M372	42.5	1.5	29.6269	90.3993
Copeland et al., 1995	K-88-40, K-88-42, K-88-45	62	1	29.686	91.1
Copeland et al., 1995	K-88-66, K-88-72	56	1	29.62	91.18
Copeland et al., 1995	PC-88-30	49	1	29.41	90.91
Copeland et al., 1995	PC-88-39	49	2	29.69	90.91
Copeland et al., 1995	PC-88-65	68	4	29.3	91.46
Copeland et al., 1995	XR-2a	69.9	0.5	29.36	90.2
Coulon et al., 1986	T248	49.2	1	30.13	91.29
Coulon et al., 1986	T286	50.5	1	30.21	90.66
Coulon et al., 1986	T301	12.2	0.5	29.892	90.135
Coulon et al., 1986	T31	90	2	29.85	90.77
Coulon et al., 1986	T323	10.5	0.4	29.696	89.963
Coulon et al., 1986	T324	10.1	0.2	29.696	89.963
Coulon et al., 1986	T328	13.5	1	29.696	89.963
Coulon et al., 1986	T380	90.5	2.2	31.72	90.92
Coulon et al., 1986	T398	85	2.2	31.4	90.97
Coulon et al., 1986	T468	74.3	4.3	30.55	90.13
Coulon et al., 1986	T486	95	2	31.57	91.39
Coulon et al., 1986	T54	102	4	31.49	92.08
Coulon et al., 1986	T68	76.6	1.5	32.31	91.64
Coulon et al., 1986	T8284	111.4	2.6	31.28	88.89
DeCelles et al., 2011	5-27-05-2	66.6	2.2	31.1964	81.0376
DeCelles et al., 2011	6-1-05-2	55	1.2	31.2134	81.0928
DeCelles et al., 2011	PD3	24.6	1	31.2403	80.9283
DeCelles et al., 2011	PD4	24.2	0.9	31.2403	80.9283
DeCelles et al., 2011	PD3	24.6	0.5	31.2519	80.9178
DeCelles et al., 2011	PD4	24.2	0.5	31.2519	80.9178
Deng (1989)		0.28	0.028	35.8151	79.4168
Deng (1992)		0.07	0.01	35.5	82.67
Deng et al. (1996)	HX1-11, 15	13	2	35.88	91.42
Deng et al. (1996)	HX2-1a,b	12.5	1.1	35.72	91.52
Deng et al. (1996)	HX5-3, 4	10	4	35.8	90.23
Deng et al. (1996)	HX7-4, 7	16.4	1.3	35.7	92.22
Deng et al. (1996); Deng and Sun (1998)	HX4-1, 3	0.3	0.006	35.6461	89.1604	0.71054	-8.1
Deng Wanming (1989)		0.07	0.007	35.43	82.78
Deng Wanming (1989)		5.3	5.5	35.43	82.78
Deng Wanming (1989)		14.9	1.49	36.03	86.62
Deng Wanming (1989)		26.5	4	34.67	87.17
Deng Wanming (1991)		0.56	0.056	35.48	81.85
Deng Wanming (1991)		1.07	0.107	36.461	88.83
Deng Wanming (1993)		0.074	0.0074	35.75	81.58
Ding (2005)	2000T16	44.8	2.6	29.7021	84.5306
Ding and Lai (2003)		142.1	5.8	30.4	86.67
Ding and Lai, 2003	99T142	141	6	30.1193	86.5407
Ding and Lai, 2003	99T38	139.7	1.1	31.6002	86.8611
Ding and Lai, 2003	99T72	127.3	0.3	31.6002	86.8611
Ding and Lai, 2003	99T73	125.5	0.7	31.6002	86.8611
Ding et al., 2003	02T394	44	0.88	35.02	81.47	0.704615	-0.24			44.98	2.15	15.99	11.79		0.18	7.01	7.99	4.6	0.98	0.8			209	34	97	41		95			9	1162	26	259	65	1.7	929	66	121	12.9	48	8.1	3	7.3	1.1	5.6	1.1	2.8	0.4
Ding et al., 2003	02T395	44	0.88	35.02	81.47	0.704687	0.82			44.3	2.15	16.05	11.7		0.19	7.3	8.4	4.5	1.2	0.65			204	38	95	45		100			8.8	1138	25	253	66	1.7	911	65	120	12.4	46	7.9	2.8	7	1	5	1	2.5	0.4
Ding et al., 2003	02T396	44	0.88	35.02	81.47	0.704573	-0.22			44.91	2.3	15.88	11.86		0.16	7.02	8.13	4.58	0.94	0.85			215	35	94	41		99			8.6	1122	25	250	61	1.6	894	64	118	12.2	46	8.1	2.8	7.2	1.1	5.4	1	2.7	0.4
Ding et al., 2003	98T03	59.18	4.16	32.7	84.32		-3.9			48.41	1.17	15.21	9.5		0.17	9.48	10.07	3.53	0.5	0.41	29.9		768	49	218	69		89			10	741	31	170	15	39	300	33	71	8.2	31	6.3	1.9	6.1	1	5.6	1.1	3.1	0.4
Ding et al., 2003	98T04	59.18	4.16	32.7	84.32		-3.45			47.2	1.78	15.13	9.91		0.15	8.8	9.32	3.76	0.67	0.52	33		839	49	189	66		83			11	950	35	204	18	46	391	37	80	9	34	7.1	2.1	6.5	1	5.9	1.2	3.3	0.5
Ding et al., 2003	98T07	30.5	0.5	33.5	83.2		-8.29			53.84	1.1	17.41	6.27		0.17	1.02	4.04	3.89	7.68	0.17	9.4		44	6.3	7.9	9.1		279			138	8102	82	1178	154	3.4	3579	536	927	90	270	36.5	9	25.8	3.4	15.5	2.7	7.4	1
Ding et al., 2003	98T15	30.5	0.5	33.5	83.2	0.709012	-8			51.2	1.17	15.53	7.65		0.2	2.49	5.95	3.01	4.89	0.41	8		61	11.4	25.1	11.8		226			97	8843	60	785	59	1.6	6903	359	672	66.7	211	30.1	7.3	20.4	2.7	12.1	2.1	5.2	0.7
Ding et al., 2003	98T16	30.5	0.5	33.5	83.2		-8.64			55.91	0.79	13.24	9.38		0.25	0.89	3.93	3.85	5.91	0.03	5.4		19	1.9	1.1	5.1		313			137	12239	86	1103	101	2	1651	683	1134	112.6	303	39.5	9.4	26	3.5	16	2.8	7.3	1
Ding et al., 2003	98T33	30.5	0.5	33.5	83.2		-8.19			51.83	1.15	16.78	7.85		0.21	0.73	3.5	2.52	6.66	0.09	3.7		16	3.6	1.1	1.3		201			146	8614	57	726	89	1.6	4553	491	852	79.3	253	35.2	8.3	19.4	2.7	12.3	1.9	5	0.7
Ding et al., 2003	98T38	30.5	0.5	33.5	83.2		-9.21			57.62	0.82	13.56	9.04		0.27	0.48	3.78	4.74	5.83	0.05	5.7		20	3.1	1.8	4.5		326			137	6849	95	1205	116	4	1573	755	1221	126.8	341	44.1	10.4	28.1	4	17.7	3.2	8.3	1.2
Ding et al., 2003	98T43	30.5	0.5	33.5	83.2		-8.7			56.94	0.87	13.32	8.93		0.25	0.48	4.28	4.32	5.83	0.13	6.8		18	3.1	1.4	2.3		299			114	7309	82	1052	104	1.6	2102	649	1123	115.8	310	40.9	9.5	26	3.6	16.1	2.9	7.3	1
Ding et al., 2003	98T44	30.66	0.56	33.5	83.2		-8.8			47.78	1.04	17.5	7.25		0.19	1.06	5.29	2.58	8.51	0.23	7.6		32	12.6	5	11		309			181	15881	89	1064	92	3.3	15973	760	1190	99.8	310	53.2	12.4	33	4.1	18.9	2.7	7.7	1.1
Ding et al., 2003	98T46	28.9	0.4	33.5	83.2		-8.43			56.46	0.8	14.72	8		0.32	0.69	3.25	3.39	6.36	0.01	3.3		22	2.2	1.1	8.5		264			122	11258	76	1098	97	2.6	3354	639	1068	107.2	268	33.7	7.8	20	3	13.9	2.3	6.4	1
Ding et al., 2003	98T49	30.5	0.5	33.5	83.2		-8.6			54	0.97	18.18	5.95		0.17	0.71	3.71	3.28	6.83	0.02	5.3		56	3.8	2.6	3.7		144			236	7998	45	653	73	3	6267	403	697	63.3	189	24	5.4	15.9	2	8.9	1.4	3.9	0.6
Ding et al., 2003	98T51	30.5	0.5	33.5	83.2		-8.45			53.87	0.71	14.85	7.55		0.26	0.72	5.46	3.6	6.57	0.29	4.7		21	2.8	2.2	2.5		225			161	5409	62	853	81	8.9	2448	553	934	89.7	247	30.8	6.9	21.5	2.7	11.9	2.1	5.7	0.8
Ding et al., 2003	98T52	30.5	0.5	33.5	83.2		-7.9			47.37	1.13	14.4	6.7		0.12	3.68	9.69	2.97	3.21	1.02	9.1		30	15.9	11.7	18.9		140			317	11985	50	555	42	3.7	7609	387	707	70.1	229	31.4	6.8	20.4	2.5	10.4	1.6	4.2	0.6
Ding et al., 2003	98T53	30.67	0.58	33.5	83.2		-7.92			51.27	0.9	16.75	7.17		0.21	0.97	4.94	4.17	8.07	0.17	4.4		17	3	1.9	3		121			132	5150	42	542	63	2.2	3914	322	578	54.6	169	22.7	5.3	14.6	1.9	8.3	1.3	3.5	0.5
Ding et al., 2003	98T54	30.5	0.5	33.5	83.2		-8.25
Ding et al., 2003	98T57	30.5	0.5	33.5	83.2		-9.09
Ding et al., 2003	98T69	29.2	0.4	33.5	83.2		-8.39
Ding et al., 2003	98T70	30.33	0.56	33.5	83.2		-8.41
Ding et al., 2003	98T71	30.5	0.5	33.5	83.2	0.708901	-8.17
Ding et al., 2003	98T73	30.5	0.5	33.5	83.2		-8.45
Ding et al., 2003	99T132	13.3	0.4	30.068	86.781	0.720089	-12.94
Ding et al., 2003	99T134	13	1	30.1	86.4	0.718188	-12.2
Ding et al., 2003	99T145	8.2	0.5	29.9847	86.5228	0.717797	-12.7
Ding et al., 2003	99T152	13	1	30	86.4	0.719316	-14.46
Ding et al., 2003	99T154	13.1	0.3	30.0099	86.5496	0.716521	-13.68
Ding et al., 2003	99T53	23	1	31.064	86.536	0.721909	-14.96
Ding et al., 2003	99T56	23	1	31.064	86.536	0.721768	-14.87
Ding et al., 2003	99T57	23	1	31.064	86.536	0.723958	-15.11
Ding et al., 2003	99T60	22.9	0.7	31.064	86.536	0.718279	-14.79
Ding et al., 2003	99T62	22.5	0.5	31.064	86.536	0.720227	-14.78
Ding et al., 2007	2002T1023	27.7	0.6	32.915	86.656
Ding et al., 2007	2002T1026	30.4	3.4	32.915	86.656
Ding et al., 2007	2003T372	36.1	0.4	32.536	85.489
Ding et al., 2007	2003T374	35.8	0.6	32.586	85.624
Ding et al., 2007	2003T492	34.2	0.2	32.164	86.795
Ding et al., 2016	PX151	34.2	0.2	26.0623	101.389	0.70653	-6.8	-3.395		68.77	0.31	13.86	1.98		0.04	0.9	1.38	4.72	5.75	0.18	3.41	59	21.8	5.29	11.6	176		42	20.8		150	1144	7.1	141	10.5	1.52	2421	69.74	126	14.9	52.1	6.95	1.73	5.76	0.54	1.7	0.28	0.81	0.1
Ding et al., 2016	PX153	35		26.0658	101.379					71.43	0.25	13.81	1.6		0.02	0.78	0.95	4.37	5.27	0.12	3.48	56	21.4	3.99	10.7	190		35	20.5		109	1244	6.65	81	8.6	2	2054	47.7	89.2	10.5	37.3	5.16	1.35	4.28	0.42	1.51	0.27	0.77	0.11
Ding et al., 2016	PX154	34.1	0.3	26.0658	101.379	0.70642	-7.5	-1.3		70.1	0.3	14.32	2.02		0.03	1.08	1.44	4.96	4.51	0.17	3.99	60	25.3	5.61	12.4	200		50	20.7		97	1591	6.99	88	9	2.34	2271	62.5	113	13.5	47.6	6.4	1.62	5.16	0.5	1.64	0.28	0.8	0.1
Ding et al., 2016	PX30	35		27.4307	100.982					66.72	0.38	13.6	3.1		0.05	0.65	2.64	4.44	4.25	0.24	4.45	66	33.4	6.06	13.5	9.01		49	19.1		152	936	12.6	173	13.8	5.04	1702	134	218	20.5	72.8	9.2	2	8.62	0.77	2.57	0.43	1.33	0.16
Ding et al., 2016	PX31	35.6	0.2	27.4307	100.982	0.70625	-4.6	-0.717		66.96	0.38	14.09	3.09		0.05	0.59	2.3	4.53	4.19	0.25	4.45	59	27.9	6	14.1	9.58		50	20.1		154	918	11.3	177	13.5	4.82	1560	59.2	115	12.6	45	6.61	1.56	5.7	0.61	2.32	0.39	1.13	0.15
Ding et al., 2016	PX34	35	0.2	27.4307	100.982	0.70623	-4.5	-0.86		66.02	0.39	13.43	3.12		0.05	1.11	2.73	4.46	4.17	0.25	4.65	66	63.9	6.22	13.5	12.3		85	19.1		154	936	11.7	176	14.1	3	1683	55.8	112	12.2	43.8	6.51	1.5	5.53	0.6	2.31	0.4	1.15	0.15
Faisal et al., 2016	C65	23.6	0.1	36.0138	71.4398
Faisal et al., 2016	S-10	24		36.0362	71.4147					73.7	0.11	15.5	0.71		0.01	0.17	1.09	3.26	4.59	0.17	1.5	0.5	17.2	1.5	11	16.8		45.1	28.3		329	161	28.6	36.1	9.7	2.5	158	10
Faisal et al., 2016	S-10B	24		36.028	71.4195					72.2	0.112	17.3	1.1		0.013	0.19	0.99	3.79	4.98	0.12	4	5	171	1.5	9	6		57	30		281	107	7.71	37	10	3.6	182	13	26	2.98	10.1	2.7	0.68	2.41	0.38	1.71	0.28	0.48	0.06
Faisal et al., 2016	S-24	123.7	0.7	36.0545	71.7033					72.2	0.39	14.6	2.32		0.05	0.63	1.37	2.84	4.57	0.28	5.1	19.6	10.9	1.5	7.6	2.5		68	21.7		295	104	11.7	126	16	11.9	226	21	39	5.38	18.3	3.8	0.58	3.3	0.48	2.57	0.52	1.08	0.21
Faisal et al., 2016	S-26	124		36.0535	71.7193					73.9	0.02	16.2	0.59		0.1	0.09	0.6	4.83	2.17	0.19	1.5	0.5	43.8	1.5	10.7	2.5		17.3	24.5		221	15.7	22.8	7.8	22	2.5	2.5	2.5
Faisal et al., 2016	S-28	124		36.0651	71.7005					73.2	0.23	14.4	1.51		0.03	0.37	1.5	3.62	4.57	0.17	1.5	5.4	19.4	2.3	8.3	3.4		38.5	19.9		229	84	17.2	104	10	7.7	212	19	41	4.55	15.6	3.36	0.59	2.87	0.45	2.55	0.63	1.53	0.27
Faisal et al., 2016	S-29	124		36.0664	71.7053					71	0.46	14.8	2.77		0.04	0.82	1.61	2.72	5.04	0.3	7.8	26.3	24.7	1.5	14	2.5		72.4	21.3		288	144	28.5	175	17.6	5.7	298	19
Faisal et al., 2016	S-47	102		35.9345	71.993					71.8	0.33	14.4	2.36		0.04	0.94	2.1	3.46	3.55	0.2	2.5	26.4	16.9	1.5	10	2.5		47.6	18.9		68.4	826	16.5	197	8.1	2.5	1147	21
Faisal et al., 2016	S-62	124		36.0431	71.7387					70	0.43	18.4	0.94		0.02	0.4	0.55	2.18	6.22	0.22	5.7	16.2	23.3	5.8	13.1	4		2.3	18.6		279	62	9.38	87	9	3.8	358	17	32	3.54	11.9	2.48	0.44	2.18	0.33	1.64	0.36	0.82	0.13
Faisal et al., 2016	S-95	101.8	0.6	35.9955	72.0796					70.1	0.38	15	2.27		0.05	0.91	2.98	3.96	3.14	0.26	4	32.1	31.1	1.5	12.4	2.5		56.6	21.2		103	809	9.62	226	18	5.1	717	24	46	6.1	21.1	3.52	1.1	2.64	0.36	1.92	0.45	0.89	0.18
Faisal et al., 2016	S-96	102		35.9292	72.008					57.1	1.12	14.4	8.65		0.16	3.82	7.12	2.49	2.08	0.43	22	191.8	22.2	25.8	22	17.7		89.2	17.8		73.5	619	21.7	165	8	0.7	631	26	54	6.46	25.2	5.24	1.51	4.5	0.66	3.69	0.92	2.05	0.33
Faisal et al., 2016	S-9A	24		35.9965	71.4865					74.1	0.21	14.3	1.41		0.01	0.24	1.32	3.33	4.11	0.08	1.5	0.8	17.9	1.5	9.7	2.5		46.2	19.7		209	395	3.83	147	7	5.3	773	27	42	5.03	15.5	2.26	0.64	1.53	0.2	0.89	0.18	0.34	0.05
Faisal et al., 2016	S-9B	24		35.9995	71.4822					75	0.08	14.6	0.63		0.02	0.11	0.69	2.61	5.39	0.1	4.6	0.5	6.6	1.5	8.5	2.5		17	22.4		274	128	25.2	66.7	11	11.6	103	13
Fan et al., 2015	MbH1	122.4	0.9	33.0401	83.7385					46.9	1.35	16.6	9.22		0.17	5.66	9.71	4.14	2.53	0.75	16.3	148.5	124	29.3	97.6	25.9		110	19.8		34	844	31.2	239	29.5	63	781	55.6	114	12.3	45.6	8.27	2.1	7.27	1.01	5.84	1.15	3.3	0.46
Fan et al., 2015	MbH10	122.4	0.9	33.0401	83.7385					48.6	1.28	16.5	8.87		0.24	6.15	8.45	3.54	2.86	0.76	14.4	120	106	24.7	87.1	6.16		92.3	17.3		69.5	702	29.1	226	28.3	118	762	53.2	108	11.8	43.8	7.77	1.99	6.93	0.95	5.51	1.07	3.14	0.43
Fan et al., 2015	MbH11	122.4	0.9	33.0401	83.7385					48.7	1.29	16.1	8.37		0.17	5.82	8.78	3.63	2.55	0.76	15.3	135	111	26.5	90.5	22.1		108	18.7		49.2	744	30.4	231	29.1	32.1	791	55.3	115	12.2	45.2	8.06	2.05	7.16	0.99	5.65	1.11	3.25	0.45
Fan et al., 2015	MbH2	122.4	0.9	33.0401	83.7385					47.8	1.36	16.8	9.12		0.24	5.67	8.4	4.51	2.66	0.77	15.8	140	115	26.6	94.5	35.5		98	18.9		53	756.2	30.6	234	29.2	90.7	739	54.4	111	12	44.7	8.01	2.04	7.06	0.98	5.7	1.12	3.2	0.45
Fan et al., 2015	MbH3	122.4	0.9	33.0401	83.7385					46.6	1.34	16.9	9.28		0.14	5.62	9.04	3.65	3.08	0.78	15	139	107	28	92.8	26.7		90.8	18.4		73.6	763	29.7	230	28.6	4.06	763	53.6	109	11.9	43.9	7.83	2.01	6.97	0.98	5.58	1.08	3.17	0.44
Fan et al., 2015	MbH4	122.4	0.9	33.0401	83.7385					50	1.27	15.5	10.11		0.14	5.09	8.87	3.09	3.22	0.78	15.1	147	102	28.3	87.9	9.11		112	20.3		91	836	31.4	241	31.1	21.7	893	58.5	119	13	47.9	8.44	2.15	7.43	1.03	5.86	1.15	3.35	0.47
Fan et al., 2015	MbH5	122.4	0.9	33.0401	83.7385					51	1.19	15.6	8.44		0.22	5.78	8.82	3.67	2.7	0.55	15.5	126	101	24.6	83.2	7.6		96.3	17.2		65.9	686	28.9	265	32.8	164	709	50.7	105	11.3	41.8	7.54	1.9	6.73	0.92	5.4	1.06	3.1	0.43
Fan et al., 2015	MbH6	122.4	0.9	33.0401	83.7385					51.9	1.13	16	8.64		0.08	3.52	7.21	3.92	2.99	0.66	13.4	136	91.8	14.9	61	20		46.9	15.5		95.5	580	25	190	22.3	16.1	663	45.5	92.2	10	37.2	6.64	1.67	5.9	0.82	4.69	0.92	2.71	0.38
Fan et al., 2015	MbH7	122.4	0.9	33.0401	83.7385					52.4	1.12	16.1	8.44		0.1	3.99	7.73	3.88	2.93	0.7	13.9	148	96.5	17.6	66.2	27.9		62.7	16.7		95.7	618	27.7	198	23.7	18.7	653	47.4	95.7	10.4	39.2	7.04	1.77	6.34	0.88	5.09	0.99	2.92	0.41
Fan et al., 2015	MbH8	122.4	0.9	33.0401	83.7385					47.7	1.25	16.9	8.27		0.15	5.27	8.57	4.24	2.94	0.76	14.9	134	102	23.9	77.7	9.94		90.4	18.9		74.9	690	29.4	218	26	3.39	741	52	107	11.4	42.5	7.58	1.93	6.76	0.94	5.41	1.06	3.08	0.43
Fan et al., 2015	MbH9	122.4	0.9	33.0401	83.7385					42.8	1.45	18.2	10.5		0.15	6.42	9.77	4.16	2.89	0.9	15.2	127	110	26.8	91.1	13.9		104	18.3		52.9	758	30.2	231	28.8	29.7	773	54.7	111	12.1	44.9	8.02	2.06	7.21	0.98	5.67	1.11	3.25	0.45
Fan et al., 2015	MdH1	120.4	0.5	33.0535	83.7106			-1.2375		70.4	0.54	12.7	3.85		0.06	0.83	3.05	3.55	2.59	0.21	9.84	41.3	11.6	6.74	10.2	72.3		52.3	14.4		48.7	230	18.8	152	8.93	1.15	5400	27.3	53.1	5.86	22.2	4.26	1.08	3.99	0.58	3.55	0.72	2.17	0.32
Fan et al., 2015	MdH10	120.4	0.5	33.0535	83.7106					64.7	0.55	14.8	4.15		0.06	3	2.87	3.53	3.31	0.18	11.7	84.8	57.4	12.7	25	20.3		117	19.3		83.2	272	23.3	202	15.4	2.56	534	30.2	59.9	6.46	25.1	4.89	1.18	4.54	0.66	4.06	0.81	2.49	0.36
Fan et al., 2015	MdH2	120.4	0.5	33.0535	83.7106					67.6	0.62	14.4	4.4		0.05	0.56	3.07	3.91	2.77	0.25	8.61	49.1	6.44	6.43	5.96	58		35.9	15.12		54.1	256	19.1	163	9.67	1.46	548	27.4	55.4	6.05	23.1	4.49	1.13	4.19	0.61	3.63	0.73	2.2	0.31
Fan et al., 2015	MdH3	120.4	0.5	33.0535	83.7106					68.6	0.62	14.4	4.3		0.06	0.62	2.53	4.07	2.94	0.24	8.68	39.7	6.9	6.04	5.81	53.4		33.8	14.2		47.1	242	17.5	159	8.72	0.81	523	26.6	54.7	5.96	22.8	4.45	1.11	4.09	0.59	3.5	0.69	2.05	0.29
Fan et al., 2015	MdH4	120.4	0.5	33.0535	83.7106					62.4	0.72	16.8	4.28		0.11	2.19	4.54	3.92	2.53	0.26	10.7	79.4	19.7	12.1	12.3	20.7		101	16.4		73.9	375	18.6	178	9.68	4.46	571	29.5	59.5	6.6	25.2	4.8	1.25	4.45	0.64	3.8	0.74	2.2	0.31
Fan et al., 2015	MdH5	120.4	0.5	33.0535	83.7106					63.2	0.69	15.7	4.66		0.07	1.7	4.95	3.71	2.64	0.25	10.9	80.4	21.4	9.91	11.4	22.4		63.6	16.6		102	381	19.8	174	9.7	12	578	30.1	60.2	6.68	25.5	5	1.26	4.64	0.67	3.98	0.79	2.32	0.33
Fan et al., 2015	MdH6	120.4	0.5	33.0535	83.7106					63.6	0.69	15.9	4.56		0.06	2.27	4.33	3.41	2.66	0.25	11.8	81.5	28.4	11.9	12.7	26.3		71	17.7		109	380	20.3	185	10.3	12	587	31.9	63.8	7.06	26.8	5.17	1.32	4.78	0.68	4.11	0.81	2.39	0.34
Fan et al., 2015	MdH7	120.4	0.5	33.0535	83.7106					60.8	0.69	16.4	5.28		0.07	2.03	4.69	3.87	3.08	0.2	11.8	98.3	26.4	10.8	12.6	23.1		65.5	17.2		117	348	18.9	199	11.7	12.9	551	28.3	55.2	6.27	23.4	4.55	1.14	4.16	0.58	3.55	0.71	2.05	0.29
Fan et al., 2015	MdH8	120.4	0.5	33.0535	83.7106					66.3	0.61	14.2	4.71		0.06	1.74	3.37	3.14	2.78	0.2	11.2	99.6	33.9	9.55	15.4	23.9		53.4	16.7		100	319	18.9	166	13.1	9.49	507	27.3	53.1	5.88	23.1	4.52	1.14	4.2	0.6	3.6	0.69	2.08	0.29
Fan et al., 2015	MdH9	120.4	0.5	33.0535	83.7106					64.9	0.65	14.4	4.93		0.08	1.7	3.97	3.44	2.72	0.21	11.6	102	24.7	11.8	13.2	24.3		84.2	17.8		87.2	370	19.8	180	13.9	6.22	547	27.8	55	6.09	24.1	4.66	1.19	4.33	0.61	3.7	0.73	2.17	0.31
Fan et al., 2018	ZH1	116.9	1	32.3966	84.4117			5.3		46	1.06	12.2	11		0.42	8.87	9.04	3.05	0	0.07	37.5	283	55.2	37.6	39.1	114			14.1		0.87	281	23.8	54.6	1.75	0.64	14.3	2.61	6.99	1.23	6.88	2.52	1.01	3.61	0.66	4.52	0.97	2.96	0.43
Fan et al., 2018	ZH2	111.8	1	32.3966	84.4117					47.7	0.94	12.3	9.9		0.37	8.08	8.5	3.49	0.01	0.08	36.7	274	53.5	34.2	35.9	95			13.4		0.68	279	25.5	50.6	1.33	0.37	20.4	2.45	6.46	1.16	6.45	2.45	1.02	3.61	0.66	4.63	0.99	3.03	0.44
Fan et al., 2018	ZH3	115		32.3966	84.4117					49.1	0.93	11.2	10.2		0.48	8.8	9.37	3.18	0.01	0.07	39.4	279	55.9	35.6	36.4	114			13.1		0.46	386	17.8	54	1.66	0.29	22.1	2.96	7.53	1.34	7.26	2.59	0.96	3.28	0.54	3.46	0.73	2.29	0.34
Fan et al., 2018	ZH4	115		32.3966	84.4117					45.7	1.01	12.3	11.6		0.51	9.36	9.08	3.21	0	0.08	38.7	288	54.3	35.3	38.7	114			13.3		0.46	317	14.8	50	1.34	0.26	21.3	2.82	6.79	1.23	6.68	2.34	0.87	2.89	0.47	2.88	0.59	1.81	0.28
Fan et al., 2018	ZH5	115		32.3966	84.4117					47.3	0.98	11.6	10.2		0.34	8.27	7.77	2.88	0.01	0.07	41.9	304	67.2	38.2	48	134			14.5		1.16	281	22.5	56.3	1.75	0.57	18.1	2.77	7.32	1.25	6.87	2.5	0.93	3.5	0.63	4.2	0.89	2.71	0.39
Fan et al., 2018	ZH6	115		32.3966	84.4117					46.6	1.31	15.7	11.2		0.24	8.36	4.96	4.44	0.02	0.09	41.9	337	46.3	42.3	44.4	101			16.9		1.12	198	21.3	64	1.78	0.59	20.6	2.69	7.23	1.25	6.89	2.42	0.92	3.3	0.58	4.05	0.89	2.79	0.42
Fan et al., 2018	ZH7	115		32.3966	84.4117					76.6	0.06	13	1.4		0.02	0.06	0.2	5.28	1.23	0.04	3.01	0.94	5.53	0.07	1.65	3.2			27.1		66	53.1	72.5	145	39.2	5.95	73.5	17.2	40.6	6.04	26.9	9.16	0.8	10.9	2	12.8	2.68	7.86	1.14
Fan et al., 2018	ZH8	115		32.3966	84.4117					77.3	0.06	12.5	1.35		0.02	0.06	0.22	4.79	1.3	0.01	3.02	1.91	4.44	0.06	1.67	3.77			27.6		70.4	58.4	76.6	142	39.3	7.39	80.7	20.5	45.8	7.23	32.1	10.57	0.91	12.4	2.2	13.6	2.84	8.18	1.18
Fan et al., 2018	ZH9	115		32.3966	84.4117					74.9	0.06	12.9	1.37		0.02	0.07	1.36	4.48	1.51	0.01	3.12	2.98	5.28	0.05	3.4	2.09			26.6		78.5	221	69.4	141	38	9.96	94.2	17.7	44.2	6.2	27.4	9.28	0.79	10.9	1.98	12.5	2.61	7.59	1.12
Fan et al., 2018	ZH10	115		32.3966	84.4117					76.6	0.06	12.4	1.29		0.02	0.06	0.85	4.3	1.5	0.01	2.92	1.1	4.25	0.05	3.25	2.64			24.7		79.5	124	66.7	124	35.2	11.4	83.6	18.1	39.5	6.26	27.9	9.25	0.79	11	1.91	11.8	2.42	7	1.01
Fan et al., 2018	ZH11	115		32.3966	84.4117					76.4	0.06	12.3	1.35		0.02	0.07	1.05	4.39	1.34	0.01	3.16	0.43	18.96	0.12	9.89	2.23			24.6		74.9	136	68.4	149	35.3	12.8	70.3	16.3	40.1	5.71	25.3	8.61	0.75	10.2	1.88	12	2.54	7.44	1.09
Fan et al., 2018	ZH12	115		32.3966	84.4117					75.7	0.07	13.8	1.44		0.02	0.06	0.22	7.84	0.14	0.03	2.07	0.92	15.91	0.14	9.31	9.3			18		7	50.6	63.5	180	29.9	1.21	51.5	13.9	38	5.02	22.4	7.78	0.76	9.6	1.78	12	2.52	7.69	1.11
Fan et al., 2018	ZH13	115		32.3966	84.4117					77.6	0.06	13.1	1.31		0.02	0.05	0.52	4.94	0.97	0.01	2.7	0.27	3.06	0	0.56	1.36			21.6		50.1	65.3	66.7	140	28.1	3.23	60.7	17.8	41.3	6.21	27.8	9.28	0.84	11.2	1.95	12.7	2.61	7.85	1.13
Fan et al., 2018	ZH14	115		32.3966	84.4117					77.9	0.06	12.9	1.61		0.03	0.07	0.08	4.91	1.31	0.01	2.54	1.47	3.02	0.04	1.87	0.93			24.2		63.8	42	57.6	132	26.2	4.26	101.6	8.4	36.6	3.26	14.3	5.54	0.53	7	1.48	10.8	2.31	7.21	1.06
Fan et al., 2018	ZH15	115		32.3966	84.4117					78	0.06	12.9	1.42		0.02	0.05	0.22	5.25	1.01	0	2.52	0.88	4.65	0.03	1.35	1.62			22.6		50.3	44	69.8	150	28.1	3.42	57.7	19	41	6.7	30.1	9.87	0.92	11.9	2.02	13	2.66	7.92	1.13
Fan et al., 2018	ZH16	115		32.3966	84.4117					77.3	0.07	12.9	1.44		0.02	0.06	0.44	4.7	1.71	0	2.64	0.8	4.35	0	2.54	3.09			23.2		75.7	51.6	66.9	169	29	7.36	146.5	15.2	39.7	5.61	25.4	8.79	0.83	10.8	1.92	12.7	2.61	7.84	1.13
Faryad et al., 2013	AF-168a	73		35.1693	69.2845
Faryad et al., 2013	AF-170	73.34	1.2	35.1693	69.2845
Faryad et al., 2013	F104-6			35.1548	69.2211
Faryad et al., 2013	F105-6			35.1967	69.2156
Fraser et al., 2001	K94-23	35	1	36.3076	74.699
Fraser et al., 2001	K94-24	105.7	0.5	36.3103	74.9291
Fraser et al., 2001	K97-JFSG	9.3	0.1	36.266	74.654
Fraser et al., 2001	K98-14	51	2	36.2969	74.7922
Fraser et al., 2001	T-85-76	26.4	1.3	35.616	75.893
Fraser et al., 2001	T-85-76	26	2	35.6227	75.8967
Fu et al., 2010	2505a	220		33.5041	91.3674					72.64	0.23	13.2	1.91	1.7	0.08	1.29	0.55	3.38	3.66	0.04	5.9	25	3.96		6						268	97	26.8	200	11		610	48.42	50.2	81.3	8.26	36.8	6.89	1.13	6.19	1.02	6.28	1.39	4.18
Fu et al., 2010	JP5-1	220		33.5041	91.3674					60.56	0.88	14.65	4.37	1.88	0.086	1.88	4.16	5.62	0.75	0.27	13.6	53.6	6.65		6.84						29	337	37.1	287	10.6		227	36.4	68.9	8.9	36.1	7.31	1.53	6.66	1.03	6.05	1.1	3.61	0.47
Fu et al., 2010	JP6-1	220		33.5041	91.3674					60.3	0.9	15.44	5.05	2.08	0.11	2.44	4.09	4.63	1.16	0.18	17	102	21.5		19.2						27.7	358	37.3	243	9.15		647	34.1	64.6	8.34	33.9	6.94	1.55	6.52	1.02	6.06	1.08	3.59	0.46
Fu et al., 2010	JP7-1	220		33.5041	91.3674					60.8	0.85	15.9	4.15	2	0.08	3.77	1.34	6.38	1.61	0.19	14.9	100	26.3		20						45.5	122	24.1	216	7.67		355	24.1	44.9	5.82	24.1	4.95	1.22	4.42	0.68	3.99	0.7	2.29	0.29
Fu et al., 2010	JP8-1	220		33.5041	91.3674					67.16	0.47	14.62	2.62	1.14	0.08	1.89	2.76	4.38	1.22	0.14	11.6	46.3	26.1		6.41						36.8	363	16.8	228	8.33		675	29.1	46	5.78	21.8	4.07	1.16	3.78	0.56	3.17	0.62	1.79	0.25
Fu et al., 2010	JP8-2	220		33.5041	91.3674					62.14	0.45	16.3	3.1	0.4	0.04	0.46	4.46	5.51	3.22	0.15	9.74	60.3	57.7		4.04						77.2	315	12.7	215	8.91		1199	25.2	38.5	4.49	16.4	2.95	0.67	2.68	0.4	2.29	0.46	1.43	0.2
Fu et al., 2010	JP8-3	220		33.5041	91.3674					47.24	0.38	14.85	2.08	1.4	0.15	1.45	14.69	2.98	2.36	0.13	7.73	30.1	18.4		5.97						72.9	439	4.45	155	6.68		734	32.6	47.7	5.6	20.3	3.44	1.1	3.36	0.47	2.68	0.55	1.59	0.22
Fu et al., 2010	JP9-1	220		33.5041	91.3674					56.85	0.7	8.88	3.26	0.89	0.25	2.21	11.9	1.62	1.52	0.17	10.4	71.6	84.8		35.2						52.5	166	21.7	225	13		326	35.9	67	7.24	27.7	5.11	1.1	4.87	0.7	4	0.77	2.26	0.31
Fu et al., 2010	JR05	220		33.5041	91.3674					73.91	0.09	13.37	1.12	0.35	0.01	0.23	0.15	0.13	8.9	0.05	2.12	13	2.84		2						277.5	20.76	15.68	130.7	6.785		2029.1	31.46	60.73	6.565	22.49	3.384	0.446	3.012	0.423	2.499	0.536	1.715	0.287
Fu et al., 2010	JR06	220		33.5041	91.3674					78.24	0.1	10.72	1.02	0.49	0.012	0.2	0.17	0.11	7.28	0.04	2.42	11.68	1.5		1.52						313.1	26.23	22.88	149.4	8.598		2743.3	42.28	80.98	8.984	30.46	4.78	0.685	4.211	0.64	3.986	0.846	2.6	0.41
Fu et al., 2010	JR08	220		33.5041	91.3674					72.6	0.11	13.8	1.23	0.38	0.01	0.29	0.17	0.14	8.97	0.06	3.37	13.33	2.41		2.67						341.9	23.82	24.03	164.8	8.884		2542.8	38.96	74.42	8.223	28.18	4.528	0.634	4.06	0.648	4.259	0.894	2.796	0.473
Fu et al., 2010	JRN04	220.4	2.3	33.5041	91.3674					50.78	1.09	15.01	7.2	2.31	0.16	7.39	4.51	4.94	1.38	0.29	30.59	224.1	384.9		207.7						42.27	245.2	19.22	108.6	6.154		593.6	15.89	33.98	4.481	18.7	3.712	1.095	3.734	0.593	3.395	0.703	1.965	0.278
Fu et al., 2010	JRN04-2	220		33.5041	91.3674					47.18	0.84	16.7	8.66	1.43	0.2	4.16	12.69	3.32	0.6	0.27	26.67	275	324.8		100.7						19.99	1640.2	19.47	96.38	5.496		226.3	16.19	32.68	4.244	17.83	3.534	1.091	3.724	0.571	3.244	0.658	1.829	0.258
Fu et al., 2010	JRN05	220		33.5041	91.3674					49.1	1.01	16.65	3.75	3.36	0.19	8.54	7.44	3.77	1.11	0.26	31.54	223	403.3		185.3						44.74	501.1	20.07	105.6	6.118		660.2	15.7	33.63	4.454	18.94	3.725	1.183	3.853	0.613	3.62	0.734	1.987	0.284
Fu et al., 2010	JRN06	220		33.5041	91.3674					50.22	0.98	15.84	5.78	3.17	0.18	8.55	3.8	3.99	1.88	0.3	29.38	235.7	356.7		141						81.26	265.4	18.15	100.8	5.728		1111.8	15.07	32.51	4.375	18.08	3.517	1.005	3.519	0.547	3.192	0.668	1.894	0.268
Fu et al., 2010	JRN06-2	220		33.5041	91.3674					49.61	0.97	16.01	5.64	3.04	0.18	8.61	4.1	4.02	1.95	0.31	30.95	247.5	384.8		145.4						82	279.3	19.05	103.5	5.94		1128.2	14.69	33.11	4.452	18.5	3.688	1.09	3.722	0.603	3.393	0.692	1.937	0.273
Fu et al., 2010	JRN07	220		33.5041	91.3674					45.05	1.04	16.34	8.03	1.95	0.2	8.9	3.63	3.15	2.62	0.31	33.05	255.1	375.4		132.3						157.2	204.5	16.38	98.52	4.939		826.1	17.12	34.5	4.46	18.5	3.631	1.125	3.67	0.547	2.982	0.603	1.641	0.229
Fu et al., 2010	JRN08	220		33.5041	91.3674					43.86	1.07	15.98	8.12	2.16	0.21	8.72	4.69	2.96	2.52	0.31	31.75	213.7	329.2		122.4						157.7	179.3	18.26	98.59	4.845		674.5	16.92	34.94	4.57	19.05	3.751	1.191	3.797	0.581	3.271	0.655	1.745	0.243
Fu et al., 2010	SH-2a	220		33.5041	91.3674					75.19	0.12	12.66	1.17	1.19	0.03	0.13	0.03	0.1	7.42	0.05	4.7	15	5.46								298	25	22.9	230	11		3110	58.9	84.5	9.61	39.3	7.28	1	5.77	1.07	5.66	1.05	3.15	0.48
Fu et al., 2010	SL15-3	220		33.5041	91.3674					72.02	0.17	11.31	1.07	1.4	0.09	2.23	2.2	1.6	4.22	0.1	8.42	11.9	6.89		2.83						116	43.7	26.7	153	6.62		761	19.9	40	4.93	19.5	4.12	0.76	3.83	0.63	3.99	0.76	2.56	0.36
Fu et al., 2010	SL18-1	220		33.5041	91.3674					68.73	0.52	11.63	2.11	1.9	0.06	5.34	1.75	2.44	1.13	0.15	21.3	116	177		18.3						27.5	132	15	145	5.13		268	16.3	31.4	3.94	15.3	3	0.7	2.73	0.42	2.46	0.44	1.51	0.2
Gao (2010)	Rnd-03	48.66	0.05	30.281	90.824
Gao and Zeng, 2014	T0646	17.6	0.1	28.9663	85.4727					71.84	0.26	14.86	0.39	1.28	0.03	0.64	1.48	3.8	4.06	0.08	6.46	29.2	22.6	3.97	8.67						228	193	12.6	76.9	7.81	12.1	557	27.8	57.7	6.35	23.9	5.09	1.05	4.32	0.55	2.76	0.46	1.27	0.17
Gao and Zeng, 2014	T0646-1	17		28.9663	85.4727	0.744505	-13.8			71.92	0.24	15.06	0.2	1.45	0.03	0.67	1.62	3.63	3.98	0.08	3.46	27.2	17.9	3.43	6.18						172	148	10.1	76.8	8.38	13.6	431	16.8	32.9	3.87	14.9	3.24	0.85	2.63	0.42	2.06	0.36	1.04	0.14
Gao and Zeng, 2014	T0646-2	17		28.9663	85.4727	0.744453	-14.1			72.6	0.23	15.19	0.36	1.35	0.04	0.67	1.68	3.46	3.98	0.08	4.1	25.8	20.5	3.37	7.1						194	192	16.2	59.4	9.51	8.74	510	18.9	38.3	4.41	16.8	3.65	0.89	3.27	0.51	2.72	0.55	1.66	0.25
Gao and Zeng, 2014	T0646-3	17		28.9663	85.4727	0.745608	-14.4			72.39	0.23	15.18	0.24	1.38	0.03	0.54	1.48	3.68	3.96	0.08	2.87	27.7	17.3	3.38	6.36						171	146	15.1	73.9	8.39	12.3	478	28	55	6.53	24.8	5.27	1.03	4.27	0.66	2.92	0.52	1.39	0.18
Gao and Zeng, 2014	T0646-4	17		28.9663	85.4727	0.744631	-14.4			72.08	0.25	15.05	0.55	1.28	0.03	0.62	1.48	3.34	3.87	0.08	4.03	30.2	21.6	4.12	7.59						182	166	10.8	62.4	10.2	10.1	506	20.3	40	4.56	17.7	3.58	0.84	2.97	0.43	2.14	0.39	1.09	0.16
Gao and Zeng, 2014	T0646-5	17		28.9663	85.4727	0.745535	-14.4			72.86	0.19	15.1	0.16	1.24	0.03	0.56	1.46	3.62	4.14	0.08	2.95	22.1	14.7	2.76	4.68						181	150	11	77.4	7.52	16.4	453	17.9	36	4.13	15.8	3.46	0.85	2.58	0.44	1.97	0.37	1.06	0.15
Gao and Zeng, 2014	T0646B	17		28.9663	85.4727					71.6	0.26	14.9	0.68	1.08	0.03	0.77	1.69	3.89	4.05	0.08	5.18	25.8	50.3	4.31	23.6						216	176	12.6	78.9	8.14	9.65	487	18.2	37.6	4.15	15.5	3.26	0.8	3.14	0.44	2.39	0.45	0	0.19
Gao and Zeng, 2014	T0647-1	17		28.9951	85.4874	0.74496	-13.7			72.72	0.21	14.99	0.56	0.99	0.03	0.54	1.64	3.5	4.08	0.08	3.78	23.5	15.1	3.15	5.39						184	168	10.1	58.7	8.7	8.22	514	20.7	39.1	4.73	17.6	3.88	0.99	2.98	0.43	1.99	0.37	0.98	0.13
Gao and Zeng, 2014	T0647-2	17		28.9951	85.4874	0.745137	-14.2			71.97	0.21	15	0.4	1.13	0.03	0.57	1.82	3.54	4.03	0.08	3.54	25.6	17.3	3.37	6.62						175	156	12.3	60	9.14	12.3	476	22.3	43.9	5.21	19.5	4.2	0.98	3.48	0.5	2.48	0.43	1.19	0.16
Gao and Zeng, 2014	T0647-3	17		28.9951	85.4874	0.745086	-14.4			72.4	0.21	15.02	0.6	0.95	0.04	0.51	1.53	3.5	4.01	0.08	3.5	23.2	16	3.19	5.8						196	162	14.8	69.1	8.49	13.1	463	18.7	37.1	4.35	16.5	3.64	0.9	3.04	0.5	2.69	0.52	1.5	0.22
Gao and Zeng, 2014	T0647-6	17		28.9951	85.4874					71.97	0.19	14.75	0.4	1.1	0.03	0.6	1.8	3.51	4.05	0.07	3.7	22.2	16.1	3.06	5.49						196	196	12.3	94.7	7.86	7.43	532	20	38.2	4.49	17.4	3.77	1.04	3.13	0.47	2.27	0.43	1.18	0.15
Gao and Zeng, 2014	T0657-1	17		29.0212	85.5214					72.76	0.16	14.9	0.61	0.75	0.03	0.46	1.47	3.65	3.83	0.08	3.6	20.1	12.3	2.41	5.01						178	174	13.6	96.2	5.45	10.3	489	22.1	45.3	5.13	18.9	4.19	1.06	3.74	0.52	2.74	0.48	1.35	0.19
Gao and Zeng, 2014	T0657-2	17		29.0212	85.5214					72.73	0.16	14.98	0.43	0.93	0.03	0.47	1.38	3.81	3.92	0.08	3.87	19.6	12.7	2.36	4.79						197	179	14.1	49.9	5.73	12	542	22.3	45.7	5.23	19.3	4.29	1.08	3.81	0.53	2.86	0.5	1.36	0.17
Gao and Zeng, 2014	T0657-3	17		29.0212	85.5214					72.82	0.17	14.98	0.6	0.83	0.02	0.54	1.44	3.95	4.03	0.07	3.9	21.1	11.1	2.53	4.61						190	176	14.9	60.4	5.5	7.57	549	23	46.6	5.36	20	4.41	1.11	3.89	0.58	3.01	0.53	1.44	0.2
Gao and Zeng, 2014	T0657-4	17		29.0212	85.5214					72.11	0.16	15.24	0.57	0.83	0.03	0.52	1.36	3.46	4.07	0.08	3.91	18.8	10.5	2.48	4.72						194	181	13.2	69	5.76	10.8	585	20.1	41.3	4.62	17.5	3.86	1.04	3.54	0.52	2.62	0.47	1.27	0.17
Gao and Zeng, 2014	T0658-1	17		29.0314	85.5507					72.92	0.16	15	0.57	0.84	0.03	0.44	1.3	3.48	4.13	0.07	3.55	19	11.7	2.51	4.66						195	168	12.5	61.1	5.7	11.6	554	21.4	44.3	4.94	18.9	4.14	1.09	3.53	0.5	2.62	0.45	1.24	0.16
Gao and Zeng, 2014	T0658-2	17		29.0314	85.5507					73.04	0.17	15.05	0.51	0.92	0.03	0.56	1.31	3.59	4.1	0.07	3.61	21.7	12.3	2.59	4.77						191	167	12.5	59.6	5.72	12.5	530	19.5	38.8	4.52	17	3.84	1.01	3.35	0.47	2.49	0.45	1.21	0.17
Gao and Zeng, 2014	T0659-1	17		28.8923	85.5541					72.51	0.09	14.94	0.44	0.32	0.01	0.2	0.72	3.98	5.38	0.21	2.92	1.55	15.9	0.74	9.14						366	38.2	8.89	32.5	9.82	9.29	144	5.34	10.1	1.16	4.04	1.03	0.26	1.25	0.25	1.59	0.3	0.81	0.11
Gao and Zeng, 2014	T0659-11	17		28.8923	85.5541	0.729045	-13.5			73.68	0.07	14.49	0.29	0.52	0.02	0.27	1.02	4.06	4.38	0.06	1.5	3.83	34.3	1.16	15.2						327	70.9	12	34.1	8.29	7.77	165	8.16	17.6	1.99	7.29	2.11	0.39	2.32	0.38	2.28	0.4	1.05	0.17
Gao and Zeng, 2014	T0659-12	17		28.8923	85.5541	0.745734	-13.4			73.34	0.09	14.42	0.41	0.41	0.01	0.37	1.12	4.14	4.27	0.05	2.32	7.21	11	1.25	4.5						292	119	8.76	25.6	6	5.52	289	6.48	13.4	1.52	5.42	1.5	0.61	1.51	0.28	1.6	0.27	0.81	0.12
Gao and Zeng, 2014	T0659-13	17		28.8923	85.5541	0.7441	-13.9			73.51	0.08	14.5	0.43	0.52	0.02	0.16	0.92	3.34	4.93	0.07	2.07	3.46	57.6	1.39	29.6						349	75.6	11.7	32.4	8.45	6.65	176	7.32	15.4	1.72	6.16	1.89	0.39	2.06	0.34	2.05	0.4	1.14	0.16
Gao and Zeng, 2014	T0659-14	17		28.8923	85.5541	0.744692	-13.8			73.91	0.06	14.8	0.2	0.57	0.01	0.13	0.98	3.96	4.52	0.05	1.45	3.21	11.6	0.9	5.58						333	63.5	9.58	23.8	7.84	7.69	153	7.96	16.5	1.94	6.85	1.9	0.37	2.01	0.32	1.81	0.32	0.88	0.13
Gao and Zeng, 2014	T0659-3	17		28.8923	85.5541	0.756763	-13.2			72.54	0.08	14.95	0.45	0.31	0.01	0.22	0.7	4.12	5.31	0.21	2.8	2.42	7.79	0.8	3.41						369	38.9	8.6	32.2	8.3	9.43	165	4.46	8.85	0.97	3.36	0.94	0.24	1.16	0.23	1.51	0.28	0.73	0.1
Gao and Zeng, 2014	T0659-4	17		28.8923	85.5541	0.755527	-13			72.96	0.09	14.9	0.44	0.27	0.01	0.21	0.7	4.54	4.89	0.19	2.44	2.03	33.9	0.97	18						338	38.1	7.32	34.8	8.67	7.59	157	4.69	9.34	0.99	3.37	0.98	0.23	1.11	0.22	1.37	0.24	0.68	0.09
Gao and Zeng, 2014	T0659-5	17		28.8923	85.5541					73.22	0.08	14.96	0.64	0.18	0.01	0.17	0.73	3.82	5.39	0.2	2.63	2.25	4.12	0.79	1.8						350	33.5	8	31.3	9.59	9.45	131	4.8	8.8	1.01	3.4	1.02	0.21	1.08	0.22	1.42	0.26	0.72	0.1
Gao and Zeng, 2014	T0659-6	17		28.8923	85.5541	0.75369	-13.3			72.92	0.09	14.81	0.57	0.18	0.01	0.2	0.72	4.08	5.25	0.2	2.17	1.72	16.2	0.77	7.67						348	37.3	8.56	32.4	11.7	8.89	135	5.53	10.4	1.18	4.12	1.19	0.23	1.33	0.24	1.58	0.29	0.78	0.11
Gao and Zeng, 2014	T0659-7	17		28.8923	85.5541					73.59	0.04	14.62	0	0.56	0.02	0.18	1.02	3.99	4.5	0.09	1.47	1.54	0.8	0.6	0.96						302	72.6	16.1	23.6	6.77	6.66	88.2	5.19	9.55	1.25	4.57	1.59	0.37	1.95	0.42	2.62	0.51	1.49	0.24
Gao and Zeng, 2014	T0659-8	17		28.8923	85.5541					74.24	0.02	14.6	0	0.38	0.01	0.35	1.16	4.23	4.38	0.06	2.03	0.77	1.24	0.33	1.06						309	55.6	20.1	59.8	4.62	7.56	48.8	4.18	7.53	0.99	3.73	1.29	0.22	1.81	0.4	2.91	0.65	2.14	0.35
Gao and Zeng, 2014	T0659-9	17		28.8923	85.5541					75.01	0.02	14.25	0	0.38	0.02	0.23	1.02	4.06	4.18	0.04	1.93	0.27	0.81	0.4	0.89						311	40.2	18.7	42.5	7.14	8.94	33.8	5.57	10.8	1.29	4.69	1.4	0.14	1.76	0.38	2.73	0.59	1.8	0.29
Gao and Zeng, 2014	T0661-1A	17		29.0399	85.5753	0.742524	-14.1			72.22	0.16	14.92	0.27	0.87	0.02	0.42	1.96	3.59	3.94	0.07	2.68	20.1	12.2	2.03	3.56						187	172	10.8	94.6	7.2	5.08	443	17.4	32.7	3.99	15.3	3.74	0.97	3.15	0.46	2.24	0.39	1.04	0.14
Gao and Zeng, 2014	T0661-2A	17		29.0399	85.5753	0.741545	-14.1			72.5	0.2	15.01	0.21	1.04	0.02	0.57	1.74	3.57	3.86	0.07	3.51	23.3	14.1	2.35	4.5						172	193	11.3	86.2	7.65	12.1	477	20.9	42.6	4.82	18.4	4.08	0.98	3.44	0.51	2.25	0.4	1.05	0.14
Gao and Zeng, 2014	T0661-3A	17		29.0399	85.5753	0.739928	-13.7			72.95	0.21	15.12	0.21	1.1	0.02	0.54	1.56	3.75	3.69	0.03	2.89	22.7	14.4	2.32	4.24						176	180	10.2	82.1	8.6	9.62	420	19.8	39.2	4.58	17.2	3.84	0.9	3.06	0.46	2.08	0.35	0.97	0.13
Gao and Zeng, 2014	T0661-4	17		29.0399	85.5753	0.739089	-13.8			73.62	0.15	14.86	0.21	0.74	0.02	0.39	1.53	3.91	3.82	0.03	2.26	17.5	10.9	1.76	3.42						185	180	7.93	68.7	7.52	9.02	424	19.8	39	4.62	17.4	3.76	0.87	2.93	0.41	1.73	0.27	0.73	0.1
Gao and Zeng, 2014	TMLS-09A	16.9	0.1	29.0468	85.5881	0.748405	-13.8			71.33	0.21	15.13	0.82	0.66	0.02	0.72	1.68	3.68	3.97	0.09	4.61	19.3	58.6	3.43	27.8						203	187	14	73.3	5.75	9.13	540	23.1	48.9	5.46	20.3	4.27	1.07	3.94	0.54	2.71	0.49	1.39	0.18
Gao and Zeng, 2014	TMLS-09B	17		29.0468	85.5881	0.748045	-13.7			72.01	0.21	15	0.64	0.84	0.03	0.88	1.6	3.67	4.05	0.09	4.97	18.8	22.4	2.89	8.28						203	173	17.1	62.3	5.81	8.2	509	24.9	52.1	5.86	21.8	4.69	1.02	4.29	0.59	3.28	0.59	1.65	0.21
Gao and Zeng, 2014	TT0658	17		29.0314	85.5507	0.748179	-13.7			72.81	0.19	14.75	0.49	0.86	0.03	0.56	1.39	3.32	3.99	0.08	4.21	17.3	161	3.6	77.2						205	162	12.2	74.8	5.91	12	468	19.4	40.4	4.54	16.6	3.81	1.02	3.27	0.46	2.47	0.43	1.25	0.17
Gao et al., 2007	CHZ-1	10.5	2.5	30.0099	86.5496	0.736289	-15.62
Gao et al., 2007	CHZ-10	10.5	2.5	30.0099	86.5496	0.736268	-15.83
Gao et al., 2007	CHZ-12	10.5	2.5	30.0099	86.5496	0.736198	-16.01
Gao et al., 2007	CHZ-5	10.5	2.5	30.0099	86.5496	0.73071	-15.81
Gao et al., 2007	CHZ-8	10.5	2.5	30.0099	86.5496	0.730878	-15.79
Gao et al., 2007	T1/03	19	1	30.8496	86.7234	0.719468	-13.27
Gao et al., 2007	T1/06	19	1	30.8496	86.7234	0.719503	-13.58
Gao et al., 2007	T1/08	19	1	30.8496	86.7234	0.719131	-15.44
Gao et al., 2007	T1/10	19	1	30.8496	86.7234	0.718719	-13.88
Gao et al., 2007	T1/11	19	1	30.8496	86.7234	0.718202	-14.07
Gao et al., 2007	T1/13	19	1	30.8496	86.7234	0.716577	-13.44
Gao et al., 2007	T1/17	19	1	30.8496	86.7234	0.725848	-16.43
Gao et al., 2007	T1/18	19	1	30.8496	86.7234	0.719132	-16.04
Gao et al., 2007	T1/59	19	1	30.8496	86.7234	0.717776	-13.19
Gao et al., 2007	Tl/10	19		30.85	86.6572	0.718719	-13.88			53.33	1.68	10.87	2.64	3.22	0.1	8.13	6.69	2.22	4.47	0.97	17.3	131.3	370	27.6	236.9				22.1		790	1421	25	974	47.3	27	3340	200	452	57.2	218.7	31.2	5.47	15.46	1.57	6.33	0.979	2.13	0.285
Gao et al., 2007	Tl/11	19		30.85	86.6572	0.718202	-14.07			54	1.62	11.09	3.59	2.22	0.09	7.74	6.83	1.33	7.33	0.76	16.9	128	368.6	26.6	226.9				22.3		550	1564	25.2	994	48.8	4.3	3931	200	456	57	217.1	31	5.47	15.21	1.56	6.33	0.972	2.16	0.282
Gao et al., 2007	Tl/18	19		30.85	86.6572	0.719132	-16.04			56.72	1.58	13.4	3.34	2.42	0.07	5.13	5.27	2.08	8.02	0.67	15	124.3	239.1	19.3	132.3				23.8		576	1196	25.4	784	34	7.3	2531	138	337	46.8	196.1	32	4.93	15.27	1.51	6.12	0.961	2.2	0.298
Gao et al., 2007	Tl/13	19		30.85	86.6572	0.716577	-13.44			54.36	1.45	12.18	4.59	1.68	0.1	6.34	6.74	2.29	6.99	0.87	17.6	119.7	320.9	24.5	174.8				20.6		391	1633	25.8	862	34.9	17.1	3452	165	364	44.8	168.6	24.6	4.73	12.96	1.4	6.02	0.979	2.35	0.313
Gao et al., 2007	Tl/03	19		30.85	86.6572	0.719468	-13.27			54.72	1.43	11.53	5.05	1.58	0.08	6.6	7.06	2.26	6.34	0.9	20.3	140	342.8	32.7	187.9				20.2		611	1260	23.9	783	46.4	52.7	3051	154	359	46.6	182.8	28.2	4.6	13.71	1.41	5.78	0.91	2.1	0.279
Gao et al., 2007	Tl/08	19		30.85	86.6572	0.719131	-15.44			56.64	1.61	13.49	4.56	1.4	0.07	4.65	5.42	2.04	8.05	0.69	14.8	114.3	239.2	22.1	124.5				23.8		598	1207	24.1	787	34.5	6.6	2537	133	329	45.8	189.6	30.8	4.8	14.67	1.44	5.87	0.922	2.11	0.283
Gao et al., 2007	Tl/17	19		30.85	86.6572	0.725848	-16.43			60.7	1.06	13.29	2.37	1.98	0.07	3.47	4.04	2.78	8.21	0.7	19.7	122.3	564.6	36.2	338.6				20.5		939	1004	28.6	966	54.2	36.7	2835	156	397	56.5	241.3	42.7	5.93	20	1.89	7.28	1.086	2.42	0.317
Gao et al., 2007	Tl/06	19		30.85	86.6572	0.719503	-13.58			60.92	1.22	14.26	3.11	1.05	0.06	2.74	3.26	2.49	9.17	0.58	8.7	70.6	89.4	11.6	55.6				27.1		441	1371	19.9	990	63	13.1	2369	241	469	54.5	185.6	22.9	3.9	11.01	1.15	4.67	0.731	1.68	0.229
Gao et al., 2007	Tl/59	19		30.85	86.6572	0.717776	-13.19			62.62	0.92	13.79	2.25	1.42	0.07	2.57	2.58	2.65	8.74	0.51	7.7	65	75.9	10.7	51				24.1		442	930	16.9	340	56.5	10.5	2869	204	418	47.2	165.4	21.8	3.91	10.51	1.08	4.29	0.638	1.42	0.183
Gao et al., 2007	CHZ-1	10		30.0406	86.5303	0.736289	-15.62			54.28	1.6	12.18	3.39	2.95	0.11	5.66	6.48	1.59	8.1	1.22	18.8	136	313	25.9	186				27.9		880	810	36.1	1101	73.2	22.3	2989	139	351	54.7	244	46.4	6.83	26.2	2.43	9.56	1.44	3.33	0.406
Gao et al., 2007	CHZ-2	10		30.0406	86.5303					54.42	1.62	12.75	3.29	2.85	0.11	5.87	6.48	1.79	7.92	1.22	18.3	137	299	24.1	276				27.2		702	798	34.9	893	68.5	25.9	2939	138	352	54.8	247	45.7	6.72	26	2.43	9.5	1.42	3.24	0.389
Gao et al., 2007	CHZ-3	10		30.0406	86.5303					55.2	1.66	12.98	2.69	3.48	0.1	5.71	6.1	1.66	8.29	1.06	18.5	141	186	23.8	158				27.4		784	704	32.2	806	66.3	15	2498	139	334	52	231	42.9	6.2	24.6	2.2	8.65	1.34	3.01	0.373
Gao et al., 2007	CHZ-4	10		30.0406	86.5303					54.18	1.53	13.59	2.7	3.88	0.12	5.95	6.54	1.61	7.5	0.93	18.6	147	297	24.9	172				24.9		712	660	29.6	834	54.9	24.2	2134	123	290	45.1	199	36.8	5.36	21.1	1.97	7.81	1.23	2.86	0.345
Gao et al., 2007	CHZ-5	10		30.0406	86.5303	0.730761	-15.81			54.37	1.51	13.7	2.89	3.67	0.11	5.74	6.36	1.67	7.62	0.94	20.1	164	329	27	202				27		781	739	32.9	884	57.9	32.3	2346	133	310	48.2	215	40.6	5.91	22.9	2.17	8.63	1.36	3.12	0.403
Gao et al., 2007	CHZ-6	10		30.0406	86.5303					55.66	0.51	13.71	3.11	3.02	0.09	4.94	5.78	1.81	8.2	0.9	17.4	134	269	21.7	151				27.4		785	688	32.7	917	70.7	26.6	2151	143	329	50.3	221	40.4	5.8	23.2	2.17	8.67	1.37	3.12	0.397
Gao et al., 2007	CHZ-7	10		30.0406	86.5303					54	1.59	12.79	3.3	2.93	0.12	6.05	6.64	1.51	8.04	1.26	19.3	151	326	25	179				27		871	844	35.5	983	65.8	22.2	3167	140	347	53.3	236	45	6.73	25.8	2.38	9.46	1.45	3.24	0.393
Gao et al., 2007	CHZ-8	10		30.0406	86.5303	0.730878	-15.79			54.15	1.6	12.76	3.25	2.82	0.12	5.84	6.67	1.46	8.27	1.2	18.2	137	316	23.6	174				27.1		564	1072	35.4	1000	73.8	13.7	3819	141	344	52.1	234	43.7	6.68	24.9	2.31	9.13	1.39	3.21	0.391
Gao et al., 2007	CHZ-9	10		30.0406	86.5303					54.07	1.62	12.64	3.43	2.68	0.12	5.9	6.79	1.37	8.36	1.38	18.5	135	324	25.3	188				28		538	911	35.6	935	70.9	15.1	3336	135	361	56.3	247	47.5	7.06	26.9	2.47	9.69	1.49	3.29	0.4
Gao et al., 2007	CHZ-10	10		30.0406	86.5303	0.736268	-15.83			53.9	1.63	12.73	3.51	2.68	0.11	6.03	6.59	1.34	8.61	1.26	19.1	145	322	25.7	188				28.1		529	861	35.5	965	75	17.2	3263	139	354	54.2	243	45.7	6.86	26.6	2.45	9.61	1.43	3.34	0.404
Gao et al., 2007	CHZ-11	10		30.0406	86.5303					53.5	1.6	12.57	3.28	2.92	0.1	6.32	7.12	1.61	7.7	1.32	19.5	142	357	25.8	194				26.6		811	855	34.5	749	50.4	20.4	3287	138	336	53.1	237	45.1	6.75	25.9	2.37	9.14	1.38	3.16	0.377
Gao et al., 2007	CHZ-12	10		30.0406	86.5303	0.736198	-16.01			54.58	1.61	12.78	3.31	2.95	0.11	5.88	6.37	1.61	8.32	1.16	20.1	152	351	25.7	193				29.4		795	790	37.4	853	80.6	16.3	2968	140	361	56.3	254	18	6.9	27.7	2.52	9.84	1.51	3.47	0.422
Gao et al., 2009	CHP1	13	1	30.1	86.4	0.72	-12.99
Gao et al., 2009	CHP10	13	1	30.1	86.4	0.7201	-13.54
Gao et al., 2009	CHP12	13	1	30	86.4	0.7201	-13.24
Gao et al., 2009	CHP13	13	1	30.1	86.4	0.7201	-13.19
Gao et al., 2009	CHP15	13	1	30	86.4	0.7266	-14.18
Gao et al., 2009	CHP17	13	1	30.1	86.4	0.7275	-13.97
Gao et al., 2009	CHP18	13	1	30	86.4	0.7282	-13.81
Gao et al., 2009	CHP3	13	1	30	86.4	0.7202	-13.32
Gao et al., 2009	CHP4	13	1	30.1	86.4	0.7203	-13.2
Gao et al., 2009	CHP6	13	1	30	86.4	0.72	-13.44
Gao et al., 2009	CHP7	13	1	30.1	86.4	0.7202	-13.38
Gao et al., 2009	CHP8	13	1	30	86.4	0.7202	-13.18
Gao et al., 2009	CHP1	10		30.0406	86.5303	0.72	-12.99			65.2	0.97	14.9	3.77		0.02	1.25	0.52	2.12	9.73	0.32	9.47	67.2	197	6.8	86.2						893	704	23.3	523	44	44.1	1938	120	230	31.6	128	22.8	3.69	13.6	1.34	5.76	0.95	2.21	0.29
Gao et al., 2009	CHP2	10		30.0406	86.5303					65.8	0.95	14.6	3.48		0.04	1.24	0.74	2.03	9.46	0.46	9.49	77.6	183	6.07	77.5						841	693	21.3	492	42.7	47.6	1897	127	237	31.9	127	21.5	3.56	13.3	1.27	5.39	0.89	2.07	0.28
Gao et al., 2009	CHP3	10		30.0406	86.5303	0.7202	-13.32			65	0.94	14.2	4.37		0.03	1.45	1.06	2.39	8.59	0.6	9.56	94.2	182	9.97	104						720	685	22.1	510	42.7	50.2	1818	126	231	31.1	124	21.1	3.47	13.1	1.29	5.52	0.89	2.14	0.28
Gao et al., 2009	CHP4	10		30.0406	86.5303	0.7203	-13.2			64.4	0.98	14.6	4.48		0.03	1.43	0.99	2.38	8.82	0.6	9.69	89.8	197	9.94	111						751	731	24.1	509	43.9	42.8	1807	128	238	32.6	129	22.6	3.73	14.1	1.4	6.02	0.98	2.27	0.3
Gao et al., 2009	CHP5	10		30.0406	86.5303					64.6	0.98	14.3	4.8		0.02	1.4	0.96	2.32	8.75	0.59	10.6	98.7	190	12.2	159						743	700	23.8	533	43.3	46	1839	127	243	48.1	140	22.9	3.71	15.5	1.39	5.94	0.98	2.4	0.32
Gao et al., 2009	CHP6	10		30.0406	86.5303	0.72	-13.44			65.8	0.96	14.4	3.62		0.03	1.21	1.01	2.42	8.55	0.62	9.02	81.8	173	8.88	101						721	688	24.1	498	42.3	42.6	1814	135	240	36.2	131	22.7	3.75	14.6	1.36	6.05	0.97	2.35	0.3
Gao et al., 2009	CHP7	10		30.0406	86.5303	0.7202	-13.38			65.5	0.93	14.3	3.92		0.02	1.4	1.03	2.25	8.67	0.61	8.78	79.4	187	9.31	108						709	607	20.9	480	41.4	40.3	1770	112	224	29.5	112	19.3	3.18	12.4	1.19	5.01	0.83	1.99	0.27
Gao et al., 2009	CHP8	10		30.0406	86.5303	0.7202	-13.18			64.7	0.95	14.6	4.17		0.04	1.32	1.06	2.34	8.85	0.63	9.69	86	185	10.1	97.4						751	682	23.1	508	42.6	39	1855	131	240	32.6	128	21.9	3.62	13.8	1.35	5.84	0.93	2.25	0.3
Gao et al., 2009	CHP9	10		30.0406	86.5303					65	0.93	14.4	4.14		0.03	1.52	1.05	2.32	8.62	0.61	9.93	82.8	182	11.9	119						720	677	22.2	493	41.8	39.4	1803	130	233	32.8	126	22.1	3.6	13.5	1.32	5.66	0.91	2.12	0.28
Gao et al., 2009	CHP10	10		30.0406	86.5303	0.7201	-13.54			65.4	0.96	14.3	4.03		0.03	1.36	1.02	2.33	8.55	0.61	9.08	87.1	190	9.51	107						713	676	22.2	513	42	42.6	1774	129	232	31.6	124	21.3	3.55	13.7	1.32	5.58	0.91	2.13	0.29
Gao et al., 2009	CHP11	10		30.0406	86.5303					63.3	0.95	14.4	4.57		0.04	1.91	1.74	2.56	8.67	0.61	10.1	83.5	191	11.2	118						705	719	22.9	500	42.1	43.4	1788	129	233	32	124	21.4	3.59	13.4	1.31	5.58	0.91	2.18	0.28
Gao et al., 2009	CHP12	10		30.0406	86.5303	0.7201	-13.24			65.9	0.98	14.8	3.44		0.04	1.2	0.93	2.28	8.46	0.57	9.19	75.1	181	8.21	86.8						685	692	22.1	483	42.2	33.2	1758	124	229	30.8	120	20.6	3.41	13.3	1.27	5.42	0.87	2.06	0.27
Gao et al., 2009	CHP13	10		30.0406	86.5303	0.7201	-13.19			66.4	0.91	14.6	2.96		0.03	1.19	0.84	2.39	8.82	0.5	9.66	73.5	194	5.49	74.7						772	701	25.3	522	43.2	53.9	1863	131	247	33.8	131	23.1	3.85	14.9	1.46	6.21	1.02	2.37	0.31
Gao et al., 2009	CHP14	10		30.0406	86.5303					63.4	0.92	13.3	3.14		0.07	2.77	3.92	2.17	7.2	0.66	10.3	72.5	131	10.9	65.9						563	540	21.1	525	46.2	40.4	1706	105	208	29.3	121	22.2	3.42	13.4	1.31	5.39	0.86	2.06	0.27
Gao et al., 2009	CHP15	10		30.0406	86.5303	0.7266	-14.18			64	0.87	13.3	3.04		0.06	2.56	3.73	2.22	7.15	0.61	9.74	69.8	119	10.7	61.7						563	513	20.4	485	42.9	40	1497	103	206	28.3	117	21.1	3.31	12.7	1.2	5.05	0.8	1.96	0.26
Gao et al., 2009	CHP16	10		30.0406	86.5303					63.7	0.91	13.4	3.07		0.06	2.71	3.88	2.27	7.23	0.66	10.5	79.2	137	11.6	69.6						585	553	21.6	530	47.5	41.5	1704	107	210	29.9	122	22.1	3.43	13.2	1.29	5.38	0.86	2.08	0.27
Gao et al., 2009	CHP17	10		30.0406	86.5303	0.7275	-13.97			63.9	0.9	13.5	3.1		0.07	2.58	3.75	2.14	7.17	0.63	10.3	73.9	130	11.1	67.5						568	537	20.5	487	45.5	38.8	1629	101	200	27.9	116	20.9	3.24	12.4	1.21	5.06	0.82	1.94	0.25
Gao et al., 2009	CHP18	10		30.0406	86.5303	0.7282	-13.81			63.3	0.93	13.4	3.23		0.07	2.76	3.97	2.09	7.23	0.67	10.6	74.8	139	11.9	72.7						562	561	21	551	47.5	40	1734	104	206	29	122	22.3	3.49	13.5	1.27	5.24	0.84	2.04	0.27
Gao et al., 2010a	PRDZ1									66	1	15	3		0	2	3	4	4	0	7	85	24	11	11						149	1025	12	127	9	4	1287	42	83	10	38	6	2	5	0	3	1	1	0
Gao et al., 2010a	PRDZ2									66	1	15.4	4		0	2	3	4	4	0	8	87	26	11	12						143	988	12	136	9	4	1234	51	94	10	38	6	2	5	0	3	1	1	0
Gao et al., 2010a	PRDZ3									66	1	15	4		0	2	3	4	4	0	7	83	23	11	12						134	994	11	127	8	3	1129	42	81	9	35	6	1	4	0	3	0	1	0
Gao et al., 2010a	PRDZ4									65.02	0.63	15.04	3.54		0.06	1.72	3.16	3.82	3.85	0.26	7.43	75.6	377.8	13.4	74.2						149	950	11.6	139	8.65	3.6	1205	46.7	88.7	9.93	37.2	6.05	1.48	4.38	0.374	2.74	0.491	1.34	0.179
Gao et al., 2010a	PRDZ5									65.29	0.64	15.18	3.62		0.06	1.7	3.24	3.77	3.8	0.26	8.03	91.6	28.7	11.4	12.9						155	995	12.9	149	9.28	3.92	1225	49.7	95.5	10.7	39.8	6.55	1.6	4.63	0.414	2.91	0.53	1.5	0.188
Gao et al., 2010a	ZM-1	15.6	0.6	29.6583	87.4667					67	0.64	15	4.17		0	2	2.2	4	4	0	8	78	23	11	15						232	681	12	47	9	19	880	37	66	8	31	6	1	4	1	3	0	1	0
Gao et al., 2010a	ZM-10	15.6	0.6	29.6583	87.4667		-7.39			69	0	14	3		0	1	3	4	4	0	6	52	22	5	14						191	623	9	78	10	14	838	35	62	8	28	5	1	3	0	2	0	1	0
Gao et al., 2010a	ZM-12	15.6	0.6	29.6583	87.4667					67	0	17	2		0	1	2	5	4	0	3	49	112	6	7						193	824	5	18	7	8	652	25	50	7	25	4	1	3	0	1	0	0	0
Gao et al., 2010a	ZM-13	15.6	0.6	29.6583	87.4667					66	1	15	3		0	2	3	4	4	0	9	107	33	13	17						40	825	9	166	6	2	1043	21	41	5	20	3	1	3	0	2	0	1	0
Gao et al., 2010a	ZM-2	15.6	0.6	29.6583	87.4667		-6.18			66	1	15	3.07		0	2	2.61	4	4	0	5	66	118	14	87						202	633	9	97	9	8	669	32	64	8	28	5	1	3	0	2	0	1	0
Gao et al., 2010a	ZM-3	15.6	0.6	29.6583	87.4667		-7.37			65	1	15	4.27		0	2	3.7	4	3	0	9	80	23	12	14						141	884	18	114	10	6	985	33	64	8	32	6	1	4	1	3	0	1	0
Gao et al., 2010a	ZM-4	15.6	0.6	29.6583	87.4667		-4.12			67	1	15	4.06		0	2	2.88	4	3	0	7	72	23	11	13						158	752	11	79	9	7	912	38	68	9	31	5	1	4	0	2	0	1	0
Gao et al., 2010a	ZM-5	15.6	0.6	29.6583	87.4667		-7.28			69	0	15	3.18		0	1	2.06	4	4	0	6	56	22	7	11						218	550	11	27	10	11	848	38	66	8	28	5	1	4	0	2	0	1	0
Gao et al., 2010a	ZM-6	15.6	0.6	29.6583	87.4667		-7.18			65	1	15	4.31		0	2	3.69	4	3	0	9	82	25	13	16						142	878	11	65	9	8	964	39	70	9	32	5	1	4	1	3	0	1	0
Gao et al., 2010a	ZM-7	15.6	0.6	29.6583	87.4667		-7.42			64	1	16	3.83		0	2	3	4	3	0	6	74	83	12	17						153	807	10	68	9	6	741	34	67	8	29	5	1	4	0	2	0	1	0
Gao et al., 2010a	ZM-8	15.6	0.6	29.6583	87.4667					72	0	14	2		0	1	2	4	4	0	4	36	13	5	6						227	567	6	27	9	11	861	28	47	5	19	3	1	2	0	1	0	1	0
Gao et al., 2010a	ZM-9	15.6	0.6	29.6583	87.4667		-5.81			70	0	14	3		0	1	2	4	4	0	5	45	18	7	9						207	664	8	46	8	8	857	37	63	7	27	4	1	3	0	2	0	1	0
Gao et al., 2010b	Rnd03	48.7	0.05	30.2219	90.6682	0.70666	-3.27			53.5	1.26	18.47	7.31	0.88	0.13	2.01	6.21	3.07	5.08	0.69	13.6	148			11.1						191	829	38.5	412	26.8		851	89	146	19.8	74.2	11.78	2.97	12	1.49	8.25	1.59	4.28	0.62
Gao et al., 2010b	Rnd04	49		30.2219	90.6682					53.42	1.21	18.58	7.41	0.92	0.09	2.03	6.19	3	4.94	0.69	13.7	149			8.48						182	819	38.7	406	26.3		836	81.6	148	18.7	72.6	10.74	2.94	11.6	1.45	8.02	1.58	4.33	0.61
Gao et al., 2010b	Rnd05	49		30.2219	90.6682	0.70661	-3.21			52.94	1.17	18.41	8.23	0.75	0.09	2.2	6.14	2.98	4.93	0.7	13.5	149			7.19						168	783	38	423	27		868	85.7	144	19.5	73.9	12.45	2.88	11.9	1.49	8.28	1.59	4.15	0.61
Gao et al., 2010b	Rnd06	49		30.2219	90.6682	0.70665	-3.39			53.2	1.21	18.58	6.86	1.45	0.17	1.84	6.3	3.01	5.09	0.7	14.1	154			7.3						204	831	39	436	27.3		860	83.3	141	19	72.7	12.45	2.96	12.1	1.51	8.36	1.63	4.4	0.63
Gao et al., 2010b	Rnd07	49		30.2219	90.6682	0.70661	-3.35			53.37	1.16	18.54	7.17	1.02	0.13	1.95	6.2	3.04	5.14	0.71	13.9	150			6.82						207	793	39.6	439	27.8		872	87.7	152	19.6	74.3	12.83	2.99	11.8	1.51	8.27	1.6	4.3	0.62
Gao et al., 2010b	Rnd08	49		30.2219	90.6682	0.70659	-3.37			53.39	1.17	18.76	6.84	1.38	0.14	1.68	6.3	3.13	5.07	0.69	13.8	149			6.77						214	810	41.2	458	28.9		861	89.8	154	20	75.9	13.11	3.05	12	1.54	8.43	1.66	4.52	0.64
Gao et al., 2010b	Rnd16	49		30.2219	90.6682	0.70736	-4.7			64.41	0.65	16.64	3.89	0.36	0.05	0.47	1.23	3.07	7.54	0.19	6.96	40.7			2.76						325	256	39.1	646	49.7		692	98.7	181	19.9	73.3	11.9	2.14	10.5	1.41	7.98	1.62	4.49	0.7
Gao et al., 2010b	Rnd17	49		30.2219	90.6682	0.70685	-3.32			64.34	0.61	16.72	4.08	0.3	0.06	0.35	1.23	3.25	7.52	0.18	7.04	29			2.06						351	203	42.4	750	56		417	110	186	22.1	74.1	12.9	2	11.1	1.47	8.32	1.71	4.88	0.75
Gao et al., 2010b	Rnd18	49		30.2219	90.6682	0.70705	-3.2			64.62	0.62	16.66	4.08	0.15	0.11	0.33	1.17	3.2	7.58	0.18	6.87	29.8			1.99						351	189	50.3	750	57.2		421	119	201	24.1	86.8	14.6	2.08	13.1	1.73	10	1.99	5.68	0.84
Gao et al., 2010b	Rnd19	49		30.2219	90.6682	0.70686	-3.28			62.91	0.68	17.35	3.69	0.3	0.05	0.63	1.56	3.07	7.88	0.22	6.36	35.8			1.24						326	291	40.8	624	46.8		898	104	176	20.9	73.7	12.6	2.34	11.3	1.43	7.94	1.64	4.42	0.67
Gao et al., 2010b	Rnd20	49		30.2219	90.6682	0.7068	-2.92			64.05	0.67	17	3.82	0.22	0.05	0.51	1.3	2.99	7.76	0.21	6.75	32.9			2.15						328	262	42.1	659	48.6		815	108	176	21.2	76	12.8	2.21	11.4	1.51	8.44	1.7	4.71	0.71
Gao et al., 2010b	Rnd09	49		30.2219	90.6682	0.70615	-1.92			53.69	0.71	19.63	3.19	2.58	0.15	1.43	3.35	5.33	4.76	0.4	6.51	77			3.34						110	704	29.7	445	32.6		930	83.5	138	17.2	61.9	10.26	2.51	9.58	1.17	6.46	1.26	3.36	0.46
Gao et al., 2010b	Rnd10	49		30.2219	90.6682					52.64	0.72	19.3	3.55	2.68	0.13	1.74	4.22	5.22	4.56	0.45	7.43	94			5.44						131	767	30.4	409	33		874	85	143	17.2	63.4	10.74	2.59	9.46	1.22	6.54	1.26	3.35	0.47
Gao et al., 2010b	Rnd11	49		30.2219	90.6682	0.70628	-1.63			53.38	0.71	19.61	5.68	0.18	0.11	0.68	3.25	4.25	6.47	0.42	6.91	87.3			3.81						196	885	30	444	33.6		951	83.7	133	17.2	61.6	10.36	2.5	9.2	1.18	6.32	1.21	3.16	0.47
Gao et al., 2010b	Rnd12	49		30.2219	90.6682	0.70609	-1.9			53.65	0.7	19.6	3.48	2.48	0.12	1.53	3.43	4.63	5.44	0.41	6.42	78.8			3.6						119	736	30.7	454	33.6		950	85.9	141	17.7	63.9	10.74	2.57	9.74	1.22	6.52	1.27	3.43	0.49
Gao et al., 2010b	Rnd13	49		30.2219	90.6682					52.9	0.66	19.69	5.68	0.28	0.06	0.67	3.9	4.52	5.82	0.41	6.61	81.5			4.1						201	651	27.8	371	30.3		860	77.1	127	15.7	57.6	9.6	2.31	8.69	1.09	5.86	1.11	2.97	0.42
Gao et al., 2010b	Rnd14	49		30.2219	90.6682	0.70614	-2.02			53.23	0.78	19.66	4.32	1.98	0.15	1.44	4.16	4.24	5.27	0.45	7.39	88.1			5.2						127	782	37.5	472	37.1		1079	99.3	155	20.6	75.5	12.64	2.98	11.7	1.5	7.82	1.54	4.02	0.56
Gao et al., 2010b	Rnd15	49		30.2219	90.6682	0.70626	-1.9			53.53	0.73	19.5	4.47	1.65	0.14	1.2	3.99	5.12	4.86	0.43	6.89	86.3			3.61						119	741	33.3	481	35.8		929	93.1	156	19	68.7	11.31	2.71	10.2	1.28	6.96	1.36	3.59	0.52
Gao et al., 2016	T0659-T-1	28.1	0.3	28.9617	85.425					73.83	0.04	14.65	0.06	0.34	0.02	0.28	0.48	3.4	5.69	0.07	1.31	8.14	11.5	0.86	9.07	1.34		14.6	21.4		459	32.4	8.41	34.6	5.31	12.2	103	2.45	4.54	0.59	2.02	0.79	0.1	0.87	0.2	1.22	0.25	0.75	0.16
Gao et al., 2016	T0659-T-2	28		28.9617	85.425					74.63	0.01	14.79	0.05	0.18	0.03	0.08	0.63	4.8	4.48	0.04	0.42	1.17	11.6	0.31	7.55	1.9		3.76	20.9		488	10.8	12.2	36.6	17.7	17.8	17.9	4.46	8.95	1.22	4.06	1.51	0.04	1.57	0.35	1.93	0.36	1.08	0.21
Gao et al., 2016	T0837-1	29	0.2	29.1917	86.1834		-10.7			74.1	0.12	13.64	0.75	0.43	0.05	0.19	0.77	2.97	5.32	0.15	5.22	3.65	1.77	1.05	2.32	2.09		39.6	19.2		657	36.5	47.9	67.2	24.7	71.5	104	12.2	26.4	3.13	12.1	3.48	0.22	4.28	0.98	7.56	1.55	5.19	0.88
Gao et al., 2016	T0837-2	29		29.1917	86.1834		-10.8			74.8	0.11	13.61	0.61	0.56	0.05	0.19	0.67	3.04	5.3	0.15	5.49	3.31	1.68	1.01	2.05	1.41		20.3	20.4		712	36.8	40.4	66.3	25.9	61.3	99.4	13.8	30.5	3.53	13.3	3.53	0.24	3.9	0.85	6.23	1.29	4.08	0.72
Gao et al., 2016	T0837-3	29		29.1917	86.1834		-10.9			75.12	0.11	13.67	0.69	0.45	0.04	0.19	0.7	2.92	5.4	0.16	5.19	3.31	1.54	0.95	1.89	2.71		15.5	19.1		693	42	37.7	66.1	24.3	66.9	100	12	25.5	3.05	11.6	3.32	0.23	3.81	0.84	6.34	1.28	4.13	0.67
Gao et al., 2016	T0837-4	29		29.1917	86.1834		-13.6			73.59	0.28	13.43	1.29	0.88	0.05	0.57	1.19	2.3	5.38	0.2	6.78	19	11.2	3.98	7.04	2.06		28.3	18.8		558	82.2	46.9	133	20.8	50.1	191	28.5	61.4	7.45	29	6.22	0.47	6.24	1.12	7.79	1.57	4.71	0.79
Geng et al., 2016	BL-1	118	3			0.7055	-1.8			62.12	0.48	16.89	2.02		0.2	2.3	2.86	2.68	2.69	0.18											99.6	385.8	13.8	58.2	5.8		681	18.7	37.1	4.5	17.4	3.3	0.9	3.1	0.5	2.7	0.6	1.5	0.2
Geng et al., 2016	D1034-2H	168		33.3723	80.6092	0.7067	-2.7			65.67	0.54	15.51	4.17		0.07	1.96	3.47	3.59	4.08	0.11											203.7	199.8	32.4	219.6	14.3		465.3	37.8	74.5	8.2	30.1	5.6	0.9	5.2	0.8	5.3	1	3.1	0.5
Geng et al., 2016	D1034-3H	168.3	3	33.376	80.5992	0.707	-3.9			55.02	0.73	16.42	7.71		0.15	3.96	7.68	4.41	2.09	0.16											126.7	211	61.2	107.2	22.2		173.1	32.1	82.5	11.3	45.5	9.8	0.9	9.3	1.6	9.9	2	5.9	0.9
Geng et al., 2016	D1034-4H	168		33.376	80.5992	0.7066	-3.5	-2.77		65.33	0.55	15.57	4.14		0.06	1.94	3.56	3.59	4.08	0.12											196.9	205.2	30.3	207.1	13.9		471.2	39.6	78.1	8.4	29.6	5.5	0.9	5.2	0.8	5	0.9	2.9	0.4
Geng et al., 2016	D1034H	168		33.3712	80.6084	0.7067	-1.8			64.65	0.56	15.31	4.2		0.06	2.01	4.23	3.45	4.05	0.11											189.6	211.2	32.2	218.7	14.6		459.9	36.5	72.8	8.1	29.3	5.6	0.9	5.2	0.8	5.1	1	3	0.5
Geng et al., 2016	D1035-2H	168		33.3843	80.5705	0.7065	-5			66.21	0.45	16.22	3.28		0.05	1.46	3.91	3.95	3.04	0.12											176.8	301.5	21.6	177.3	13.6		409	17.6	39.4	4.6	17.6	3.6	0.8	3.6	0.6	3.5	0.7	2.2	0.4
Geng et al., 2016	D1035H	168		33.3843	80.5705	0.7067	-5.1			66.54	0.56	15.49	4.01		0.06	1.79	3.7	4.1	2.68	0.12											158.2	238.8	32	241.8	14.7		208.1	35.2	72	8.1	29.7	5.8	0.9	5.4	0.9	5.2	1	3.1	0.4
Geng et al., 2016	D1037H	160		33.4551	80.468	0.7063	-2.6			55.35	0.86	17.68	7.27		0.12	4.45	7.34	3.4	1.73	0.16											69.2	358.8	25.7	134.7	11.9		315.1	17	43.2	5.4	21.9	4.5	1.2	4.5	0.7	4.6	0.9	2.6	0.4
Geng et al., 2016	D1039-2H	159.4	3	33.5417	80.1218	0.7064	-5.2			62.89	0.58	16.32	5.3		0.1	2.27	4.27	3.88	3.08	0.28											224.9	392.4	35.3	232.5	12.9		618.7	37.3	72.3	8.3	31.7	6.1	1.1	5.7	0.9	5.6	1.1	3.3	0.5
Geng et al., 2016	D1039-3H	159		33.5417	80.1218	0.7073	-5.4	-3.65		76.64	0.08	12.45	1.24		0.03	0.08	0.62	3.11	5	0.01											257.7	48.6	20.7	115.7	11.7		184	26.6	66.1	6.6	23.2	4.6	0.3	3.9	0.6	3.8	0.7	2.3	0.4
Geng et al., 2016	D1039H	159.96	3	33.5267	80.1541	0.7075	-2	-3.39		72.07	0.18	14.11	1.97		0.04	0.22	0.88	3.46	6.12	0.03											201.8	138.6	25	183.6	9.7		1062.3	85.7	161.6	16.5	54.6	7.9	1	6.5	0.9	5	0.9	2.7	0.4
Geng et al., 2016	D1046H	118.6	3	33.3778	81.5719	0.7088	-7.6	-9.35		60.63	0.76	15.85	3.74		0.05	2.02	9.6	2.87	3.26	0.28											75.7	471.2	24.5	159.1	13.2		593.1	34.6	70	8.3	31.4	5.8	1.2	5.2	0.8	4.5	0.8	2.5	0.4
Geng et al., 2016	D1048H	120		33.3679	81.5679	0.7092	-7.6			63.46	0.71	15.54	1.93		0.01	2.6	7.44	2.02	4.16	0.24											93	413.7	22.7	149.2	13.4		837.9	24.7	58.5	7.3	28.5	5.3	1.4	4.8	0.7	4.2	0.8	2.3	0.3
Geng et al., 2016	D1049-2H	120		33.3678	81.5721	0.7096	-8.7			63.44	0.76	15.82	0.93		0.01	2.47	11.2	2.44	0.25	0.31											5.4	329.9	24.6	170.8	14.8		62.9	16.2	42.3	5.6	23.4	5.3	0.8	4.9	0.8	5	0.9	2.6	0.4
Geng et al., 2016	D1049H	120	3	33.3678	81.5721	0.7082	-7.2	-9.89		57.09	0.89	15.3	6.89		0.12	3.22	7.17	2.52	6.09	0.33											105.4	468.4	27.7	160.8	14.3		671.4	47.3	90.7	10.3	38	6.8	1.5	6.2	0.9	5.2	0.9	2.8	0.4
Geng et al., 2016	PBN-50-1	119.9		33.3678	81.5722	0.71	-9			63.32	0.76	16.09	0.95		0.02	2.58	12.22	1.12	0.23	0.27											7.5	188.6	28.9	133.8	14.2		53.2	8.5	25.7	4.2	18.9	5.1	0.4	5.5	1	6.2	1.2	3.3	0.5
Geng et al., 2016	PBN-50-2	120		33.3678	81.5722	0.7102	-8.9			62.63	0.77	15.96	1.51		0.03	2.6	12.96	0.58	0.16	0.29											6.2	154.1	27.4	150.7	14.7		38.6	8.5	27.1	4.5	19.8	5.1	0.4	5.3	1	6	1.2	3.1	0.5
Geng et al., 2016	PBN-51-1	120		33.3669	81.5646	0.7086	-7.6			64.93	0.59	15.5	3.34		0.1	1.99	4.48	2.78	3.39	0.21											152.8	372.8	23.3	114.5	13.5		602.7	36.9	66.7	8.1	29.6	5.4	1.1	4.9	0.8	4.4	0.9	2.4	0.4
Geng et al., 2016	PBN-53-3	165		33.366	80.7219	0.7029	-4.3			74.83	0.05	13.3	1.12		0.02	0.08	0.91	3.2	5.58	0.01											191.8	73.7	18.8	94.1	16.5		236.6	17.5	34.3	4.4	16.6	3.8	0.4	3.5	0.6	3.7	0.8	2.1	0.3
Geng et al., 2016	PBN-53-8	165.1	3	33.366	80.7219	0.7037	-5.1			75.28	0.06	12.8	1.07		0.03	0.13	0.95	3.06	5.7	0.01											175.5	64.1	23.3	106.2	14.1		76.4	28.3	53.8	6.9	24.6	5	0.4	4.5	0.8	4.7	1	2.7	0.4
Geng et al., 2016	PBN-54-1	165		33.3723	80.6095	0.7075	-5.2			69.43	0.34	14.96	3.06		0.07	0.92	2.7	3.52	3.82	0.09											137.8	224.2	15.6	124.6	14.5		589.9	36.3	61.4	6.9	23.8	3.9	0.8	3.4	0.5	2.9	0.6	1.6	0.2
Guan et al., 2012	ML18-1	38	1	29.154	93.68					51.08	0.82	16.5	10.42		0.26	5.02	6.69	4.55	2.44	0.79	21.6	184	85.2	24.5	27.5	169		206	30.45		143	675	16.7	291	12.2	8.73	370	139	239	25.7	83.2	10.7	1.76	6.94	0.74	3.2	0.58	1.58	0.24
Guan et al., 2012	ML18-10	38	1	29.154	93.68					65.91	0.34	17.08	3.28		0.06	1.18	3.33	5.43	3.01	0.19	4.43	63.9	7.06	6.38	5.62	19.5		59.4	20.13		85.4	1223	9.59	157	9.56	2.63	1441	54.6	95.7	10.8	37.5	5.68	1.38	3.79	0.45	2.04	0.34	0.91	0.14
Guan et al., 2012	ML18-2	37.4	0.4	29.1533	93.678					71.03	0.12	15.47	1.75		0.04	0.67	2.51	4.93	3.22	0.09	2.65	33.5	3.87	3.56	3.04	10.3		34.3	16.86		82.1	961	4.43	89.4	4.71	2	1094	24.7	43.7	4.89	16.6	2.46	0.72	1.64	0.2	0.91	0.15	0.42	0.07
Guan et al., 2012	ML18-3	38	1	29.154	93.68					66.59	0.33	16.74	3.07		0.06	1.12	3.46	5.5	2.41	0.17	4.36	59.6	6.21	6.07	5.09	19.5		55	19.69		72.2	1106	8.42	127	8.87	2.11	811	43.7	78.7	8.83	30.5	4.79	1.14	3.21	0.38	1.76	0.32	0.78	0.12
Guan et al., 2012	ML18-4	38.5	0.4	29.1546	93.6828	0.70531	-1.4
Guan et al., 2012	ML18-4	38.5	0.4	29.1546	93.6828					54.8	0.79	17.24	8.56		0.17	4.35	5.14	4.96	2.53	0.46	10.6	152	97.3	20.9	95.8	23.6		165	25.81		154	859	6.97	113	6.45	10.7	503	49.7	88.7	9.62	32.2	4.31	0.78	2.9	0.32	1.39	0.25	0.65	0.1
Guan et al., 2012	ML18-5	38	1	29.154	93.68					56.29	0.74	16.76	8.19		0.18	3.83	5.49	4.8	2.36	0.7	13.2	144	66	19.1	26.1	54		154	25.64		139	944	13	243	9.66	12.4	545	128	217	23.4	75.5	9.42	1.57	5.97	0.63	2.63	0.47	1.21	0.2
Guan et al., 2012	ML18-6	38	1	29.154	93.68					55.97	0.56	15.71	7.73		0.19	3.91	4.51	2.85	6.89	0.44	15.5	145	61.7	17.7	20.7	22.2		146	20.3		212	868	14.1	166	9.62	5.28	2801	72.9	130	14.9	52.5	7.93	1.81	5.6	0.67	2.99	0.53	1.34	0.22
Guan et al., 2012	ML18-7	38	1	29.154	93.68					66.35	0.32	16.92	3.24		0.06	1.18	3.39	5.46	2.63	0.18	4.53	59.1	7.14	6.23	5.71	13.8		56.6	19.18		75.2	1203	8.16	132	7.54	1.99	1027	46.8	82.6	9.31	32.1	4.82	1.17	3.2	0.39	1.68	0.31	0.77	0.12
Guan et al., 2012	ML18-8	38	1	29.154	93.68					65.26	0.26	17.68	2.75		0.05	1.03	2.85	5.08	4.54	0.16	3.88	53.2	5.94	5.56	4.97	17.1		50.8	19.02		110	1309	7.87	133	7.62	2.59	3120	51.8	91.6	10.1	34.4	4.95	1.5	3.25	0.38	1.61	0.3	0.75	0.12
Guan et al., 2012	ML18-9	38	1	29.154	93.68					68.07	0.27	16.45	2.53		0.05	0.89	3.06	5.53	2.84	0.17	3.5	47.6	8.36	4.83	4.86	21.7		44.8	18.58		79	1212	8.09	137	7.99	2.34	1344	43.2	77.6	8.77	30.7	4.7	1.2	3.13	0.38	1.72	0.3	0.75	0.12
Guo and Wilson, 2012	DG-08	15		28.3371	87.6732	0.779698	-16.8488			72.96	0.05	14.62	1.13		0.03	0.18	0.58	4.89	4.67	0.23	1.18	2.35	8.3	0.51	1.98	2.37		20.19			325.9	59.58	8.32	42.8	9.47		154.21	2.74	6.06	0.89	4.46	1.35	0.12	1.47	0.35	2.22	0.46	1.29	0.2
Guo and Wilson, 2012	DG-2	15		28.3371	87.6732	0.795968	-15.5028			74.03	0.12	14.11	1.27		0.02	0.25	0.81	3.47	5.08	0.08	2.7	11.57	15.9	2.29	5.02	4.21		22.01			102.37	44.43	16.39	44.73	14.01		351.9	5.01	10.43	1.22	5.44	1.72	0.22	1.29	0.31	2.05	0.41	1.03	0.15
Guo and Wilson, 2012	DG-24	15		28.3371	87.6732	0.797297	-16.2051			74.68	0.06	14.94	0.95		0.01	0.11	0.52	4.48	3.89	0.17	1.2	2.04	26.29	0.68	13.11	3.05		16.3			416.36	53.74	9.77	26.14	8.52		108.35	3.49	6.58	0.71	3.25	0.74	0.13	1.07	0.23	1.45	0.28	0.81	0.12
Guo and Wilson, 2012	DZ-15	15		28.3371	87.6732	0.775905	-16.2246			74.56	0.09	13.78	1.23		0.04	0.22	0.76	3.38	4.97	0.11	2.38	9.74	21.72	2.7	3.37	6.79		17.96			95.86	57.28	15.6	65.12	12.05		212.4	4.69	8.78	1.31	6.12	1.97	0.26	1.83	0.42	2.73	0.56	1.52	0.24
Guo and Wilson, 2012	GF-6	22.9		27.6035	88.9712	0.764963	-14.9956			73.09	0.04	15.67	1.03		0.02	0.15	0.55	4.48	4.49	0.17	1.7	3.96	10.32	0.78	1.77	3.11		26.3			446.9	118.05	5.42	35.78	18.85		241.5	6.34	10.66	1.16	4.03	1.01	0.13	1.15	0.22	1.18	0.2	0.51	0.07
Guo and Wilson, 2012	GG-2	22.9		27.6035	88.9712	0.755178	-16.2246			70.87	0.16	15.39	2.16		0.03	0.38	1.74	3.56	4.69	0.1	2.68	11.2	26.09	2.65	17.45	8.43		39.8			294.55	126.74	20.57	86.14	30.65		437.69	18.66	39.39	4.11	15.07	4.14	0.67	3.43	0.46	2.53	0.43	1.15	0.16
Guo and Wilson, 2012	GP-05	22.9		27.6035	88.9712	0.766816	-14.664			73.39	0.08	14.12	1.87		0.04	0.26	1.32	3.55	4.51	0.15	1.78	6.07	10.28	1.21	12.8	5.24		20.81			281.27	76.8	8.26	68.05	28.17		286.81	9.13	15.91	1.74	6.91	2.27	0.28	1.54	0.26	1.35	0.24	0.57	0.08
Guo and Wilson, 2012	GP-09	22.9		27.6035	88.9712	0.784604	-15.2687			72.05	0.13	15.23	2.13		0.02	0.31	1.06	3.51	4.87	0.18	3.09	7.93	15.17	2.9	16.75	8.36		32.42			349.14	89.37	13.07	74.31	21.85		258.13	10.16	20.06	2.26	8.43	2.54	0.38	2.03	0.32	1.48	0.24	0.58	0.08
Guo and Wilson, 2012	GU-8	22.9		27.6035	88.9712	0.732016	-16.5562			70.56	0.21	14.78	2.64		0.04	0.43	1.42	3.69	4.91	0.21	3.09	10.75	28.51	4.06	21.57	10.32		45.11			212.71	138.09	23.05	95.97	29.7		515.03	11.59	17.83	2.06	7.69	2.62	0.42	2.28	0.34	1.61	0.27	0.59	0.08
Guo and Wilson, 2012	GZ-7	22.9		27.6035	88.9712	0.784039	-15.8539			74.01	0.03	14.72	0.92		0.03	0.17	0.49	4.61	4.66	0.15	1.02	2.13	8.45	0.91	2.18	2.09		34.12			269.52	23.71	3.19	22.1	14.57		77.18	3.83	7.02	0.85	3.89	1.13	0.08	1.23	0.19	1.06	0.21	0.54	0.08
Guo and Wilson, 2012	J-G16	16.11		28.5964	85.3997	0.784616	-17.7072			74.59	0.05	15.06	0.62		0.02	0.06	0.51	4.28	4.66	0.22	0.78	1.64	41.35	0.7	6.92	16.08		29.14			452.2	68.33	11.74	35.23	4.25		191.92	3.72	7.04	0.87	3.97	1.13	0.21	1.48	0.31	1.97	0.35	0.85	0.12
Guo and Wilson, 2012	J-G2	16.11		28.5964	85.3997	0.786894	-18.0583			75.32	0.04	14.29	0.61		0.03	0.08	0.42	4.69	4.22	0.21	0.92	0.83	20.43	0.42	2.19	6.11		38.7			510.17	34.71	9.29	20.83	6.61		106.34	5.14	9.51	1.13	4.34	1.18	0.24	1.52	0.28	1.78	0.37	1.01	0.15
Guo and Wilson, 2012	J-G4	16.11		28.5964	85.3997	0.795106	-16.8098			72.2	0.08	14.19	0.67		0.04	0.08	0.95	5.23	4.95	0.23	2.87	4.07	45.14	0.89	14.01	8.71		44.38			568.42	37.81	6.79	31.69	8.03		123.9	2.46	4.38	0.62	2.73	0.66	0.14	0.77	0.18	1.24	0.26	0.67	0.1
Guo and Wilson, 2012	J-G7	16.11		28.5964	85.3997	0.759258	-16.0685			74.06	0.05	15.12	0.69		0.03	0.07	0.73	4.36	4.35	0.2	1.03	2.71	22.72	0.54	2.31	10.02		57.42			321.71	41.35	10.34	27.57	6.7		127.09	6.05	9.39	1.02	3.91	1.15	0.26	1.43	0.27	1.66	0.33	0.92	0.13
Guo and Wilson, 2012	LG-02	14.4		28.3518	91.0935	0.748567	-16.1271			71.68	0.22	14.31	1.89		0.02	0.46	1.63	4.24	4.48	0.11	3.64	38.01	27.38	5.19	9.8	13.07		45.27			169.37	145.67	12.79	71.53	15.35		517.49	34.37	72.15	7.69	28.48	6.15	0.86	4.83	0.63	2.66	0.32	0.71	0.1
Guo and Wilson, 2012	LG-06	14.4		28.3518	91.0935	0.724001	-15.2882			74.58	0.13	14.56	1.57		0.02	0.17	1.13	3.36	4.39	0.06	4.85	21.67	13.69	2.54	4.85	3.7		41.18			204.69	74.72	8.42	62.43	9.2		145.61	19.42	32.37	3.76	12.45	3.05	0.5	3.12	0.43	1.94	0.35	0.92	0.14
Guo and Wilson, 2012	LG-17	14.4		28.3518	91.0935	0.743074	-16.4197			73.47	0.19	13.93	1.52		0.03	0.29	1.48	3.69	4.6	0.07	3.17	25.29	16.82	3.48	5.63	7.3		46.09			223.14	106.7	15.8	95.75	10.71		238.19	15.29	24.42	2.94	12.78	3.81	0.52	2.47	0.38	2.32	0.43	0.98	0.12
Guo and Wilson, 2012	LG-29	14.4		28.3518	91.0935	0.745208	-16.7318			72.39	0.18	14.86	1.65		0.04	0.35	1.26	3.43	4.65	0.09	2.71	16.19	38.23	4.89	11.53	5.46		59.49			186.42	134.58	21.41	84.05	12.53		302.76	32.86	49.01	5.47	23.16	5.93	0.56	4.41	0.72	3.28	0.49	1.15	0.16
Guo and Wilson, 2012	N-702	16.8		28.2653	86.3493	0.746612	-15.5223			74.64	0.15	13.55	1.42		0.02	0.28	1.02	3.65	4.63	0.06	2.33	10.31	20.02	3.47	15.7	8.29		23.97			268.17	108.41	17.39	79.26	14.37		488.02	16.88	32.72	3.29	14.26	3.54	0.51	3.04	0.52	2.98	0.52	1.21	0.16
Guo and Wilson, 2012	NL-03	16.8		28.2653	86.3493	0.768077	-17.3365			73.76	0.05	15.07	0.48		0.02	0.03	0.35	4.1	4.53	0.18	1.75	6.01	15.72	4.39	10.29	8.3		20.06			656.61	112.18	5.8	50.1	10.11		162.43	3.86	7.34	0.93	3.66	1.03	0.22	1.13	0.22	1.18	0.2	0.49	0.07
Guo and Wilson, 2012	NL-07	16.8		28.2653	86.3493	0.740236	-15.9515			72.33	0.16	13.82	1.54		0.05	0.37	1.18	3.59	5.21	0.1	2.57	11.35	26.79	1.82	22.9	11.23		41.6			218.69	89.02	15.84	110.21	13.92		539.42	11.72	25.81	2.77	11.08	3.23	0.49	2.48	0.39	1.87	0.33	0.82	0.11
Guo and Wilson, 2012	NL-12	16.8		28.2653	86.3493	0.751328	-17.9218			74.16	0.11	15.4	1.35		0.02	0.13	0.57	3.7	4.06	0.15	1.32	5.27	21.08	1.16	21.9	5.64		35.21			381.32	27.09	5.28	55.8	15.97		200.69	5.36	10.73	1.31	5.56	1.58	0.35	1.54	0.26	1.45	0.25	0.6	0.08
Guo and Wilson, 2012	NL-25	16.8		28.2653	86.3493	0.771711	-17.9218			73.08	0.08	15.23	1.12		0.04	0.11	0.91	4.11	4.46	0.13	1.74	13.99	11.85	1.49	13.02	10.71		23.4			479.52	77.11	3.86	44.23	18.09		152.97	2.58	5.87	0.68	3.11	0.96	0.18	0.87	0.17	0.98	0.18	0.47	0.07
Guo and Wilson, 2012	NL-31	16.8		28.2653	86.3493	0.761542	-15.2882			74.57	0.08	14.09	0.96		0.03	0.09	0.68	4.55	4.21	0.16	1.66	9.15	13.6	5.88	10.83	6.24		21.94			320.16	39.74	6.12	43.18	8.28		56.39	5.39	10.58	1.27	5.21	1.46	0.31	1.43	0.26	1.45	0.24	0.61	0.09
Guo and Wilson, 2012	NL-36	16.8		28.2653	86.3493	0.752646	-16.7903			75.24	0.06	14.83	0.7		0.03	0.02	0.64	3.86	3.95	0.22	2.05	6.87	13.38	1.22	17.3	6.91		19.32			472.65	98.79	5.77	47.29	16.2		239.35	6.51	12.32	1.44	5.83	1.75	0.29	1.42	0.24	1.29	0.22	0.51	0.07
Guo and Wilson, 2012	ZF-18	14.65		29.0498	90.0186	0.734976	-14.664			73.96	0.13	14.26	1.02		0.02	0.14	0.96	3.91	4.19	0.08	1.95	18.41	10.11	5.16	7.79	12.51		48.62			335.8	116.72	12.51	67.15	13.38		385.23	22.79	42.15	4.57	15.76	3.11	0.48	2.75	0.36	1.73	0.29	0.55	0.06
Guo and Wilson, 2012	ZF-26	14.65		29.0498	90.0186	0.726439	-13.9032			73.28	0.14	15.01	1.16		0.03	0.15	0.87	4.18	4.36	0.1	2.36	10.52	8.43	3.77	15.3	8.39		40.18			327.58	67.85	8.35	76.21	9.48		421.74	27.02	52.25	5.43	18.23	3.59	0.37	3.08	0.41	1.89	0.28	0.62	0.08
Guo and Wilson, 2012	ZF-31	14.65		29.0498	90.0186	0.767401	-14.1568			72.53	0.12	14.39	1.35		0.04	0.25	0.76	4.57	5.18	0.07	3.17	13.08	15.38	6.38	8.34	17.28		54.91			289.44	116.52	11.86	63.9	15.47		403.16	26.18	53.16	6.06	22.57	4.63	0.76	3.27	0.42	2.03	0.35	0.79	0.1
Guo and Wilson, 2012	ZF-38	14.65		29.0498	90.0186	0.739166	-17.0049			74.65	0.11	15.37	0.78		0.03	0.2	0.63	4.36	3.74	0.12	2.28	7.35	6.39	4.29	6.29	9.4		37.29			362.11	109.46	5.48	66.29	10.82		426.53	24.48	47.89	6.16	20.35	4.15	0.55	3.26	0.42	1.78	0.27	0.55	0.07
Guo et al., 2007	G006	16.3	1	29.5	90.9	0.704743
Guo et al., 2007	G016	15.1	1	29.8	91.8	0.707364
Guo et al., 2007	G019	15.1	1	29.8	91.8	0.707617
Guo et al., 2007	G025	26.2	1	29.6	94.6	0.705428
Guo et al., 2007	GO9	14.2	1	29.4	89.4	0.705821
Guo et al., 2007	GUO37	17.2	1	29.3	88.8	0.706582
Guo et al., 2007	GUO48	18.5	1	29.6	85.6	0.706748
Guo et al., 2007	GUO51	17	1	31.5	81.8	0.709003
Guo et al., 2007	GUO62	17	1	31.5	81.8	0.707192
Guo et al., 2007	ZF09	22.5	1	32.466	80.17	0.707975
Guo et al., 2007	ZFG17	12.4	1	29.7	89.9	0.704702
Guo et al., 2011	T645-1	25.1	0.6	29.637	94.7148			-0.8		71.83	0.36	14.95	2.23		0.03	0.56	1.83	3.6	3.48	0.09	3.92	23.5	2	2.86	2.17	8.36		44.4	19.5		113	386	7.84	143	5.27		688	32.9	63	6.98	25.2	3.99	1.09	2.91	0.36	1.61	0.25	0.64	0.085
Guo et al., 2011	T656	61.1	0.4	29.637	94.7148			6.9		59.24	0.89	18.32	8.22		0.18	2.15	5.51	2.46	2.01	0.62	10.4	53.6	1.18	69.7	2.42	19.8		106	19.9		93	682	35	67.6	8.06		418	34	71.7	9.4	38.9	7.98	2.04	7.25	1.06	5.8	1.12	3.39	0.46
Guo et al., 2011	T670	80.5	0.7	29.5474	94.4368			1.8		71.72	0.28	15.13	2.04		0.06	0.54	2.05	4.34	3.19	0.08	6.44	17	2.11	2.7	1.32	1.95		36.3	15.4		112	243	43.9	99.3	12.9		640	29.4	55.4	6.22	22.6	4.74	1.25	4.8	0.92	6.3	1.37	4.47	0.73
Guo et al., 2011	T671	165	1	29.5474	94.4368			2.3		75.92	0.17	13.24	1.17		0.03	0.18	1.27	3.23	4.78	0.03	3.41	7.03	1.01	1.1	1.01	2.66		17.5	12.2		131	250	11.4	74.5	6.76		926	54.6	101	10.8	38.7	6.27	1.11	4.93	0.63	2.82	0.43	1.03	0.11
Guo et al., 2011	T672	50.3	0.4	29.5474	94.4368			2.4		79.89	0.1	11.5	0.65		0.02	0.11	1.03	2.54	3.81	0.02	5.03	6.4	1.48	1.04	1.65	2.75		13.9	12.7		124	143	23	84.2	5.16		508	20.8	39.4	4.39	15.8	3.14	0.85	2.67	0.4	2.78	0.79	3.45	0.69
Guo et al., 2011	T673	165	1	29.5474	94.4368			2.5		75.58	0.2	12.82	1.12		0.03	0.23	1.24	3.11	4.63	0.02	3.9	11.8	1.33	1.41	1.04	3.3		18.1	11.8		131	208	8.81	64.6	8.59		798	49.4	91.5	10	35.2	5.93	0.95	4.6	0.56	2.4	0.34	0.83	0.091
Guo et al., 2011	T674	25.9	0.6	29.5474	94.4368			1.2		67.13	0.48	17.6	3.06		0.05	1.01	3.78	4.97	1.44	0.15	5.14	33.1	4.2	3.63	1.92	2.97		55.4	19.7		79.5	615	10.9	169	4.57		290	25.3	48	5.46	20.2	3.43	1.05	2.69	0.36	1.94	0.36	1.09	0.16
Guo et al., 2012	T643	63.1	0.6	29.635	94.7138			-6.6
Guo et al., 2012	T644	83.4	1.2	29.6328	94.713			8.4
Guo et al., 2012	T645	64.4	0.7	29.6328	94.713			-9.9
Guo et al., 2013	XN-20	180	2	29.356	90.1912					73.59	0.26	13.27	1.98		0.071	0.67	2.51	3.83	2.84	0.08	4.32	30.74	2.98	3.6	1.44	1.68		30.68	12.58		53.78	330.4	6.12	59.14	2.48	3.28	470	8.98	15.74	1.74	6.3	1.22	0.58	1.12	0.16	0.98	0.2	0.62	0.1
Guo et al., 2013	XN-8	170	2	29.4963	89.6308			14.4653		62.65	0.51	16.52	5.66		0.12	2.29	4.79	3.6	1.34	0.11	16.3	147	6.89	15.8	6.23	43.4		68.6	17		36.5	299	20.3	9.51	5.38	3.28	365	20.8	35.5	3.86	14.9	3.13	0.98	2.97	0.6	3.45	0.72	2.14	0.357
Guo et al., 2013	XRX-1	182	1	29.3653	88.759			14.056		61.35	0.68	16.55	6.46		0.13	2.59	5.75	3.55	1.44	0.14	15.62	137.76	6.34	17.76	6.66	34.16		62.94	16.3		33.08	345.8	18.42	108.54	6.46	1.54	334.6	12.44	25.56	3.2	13	3.04	0.96	3.2	0.5	3.14	0.66	1.96	0.3
Guo et al., 2013	XRX-2	181	1	29.3653	88.76					70.88	0.38	13.53	3.48		0.1	1.23	4.19	3.92	1.74	0.09	8.78	80.7	8.34	8.81	3.99	5.82		41.6	14.2		28	262	14.5	11.7	5.46	0.66	325	12.3	23.6	2.65	10.2	2.17	0.83	2.22	0.43	2.45	0.51	1.54	0.26
Guo et al., 2013	XRX-3	178	3	29.366	88.6875			12.8457		75.04	0.16	13.31	1.04		0.023	0.31	2.14	4.1	2.64	0.04	0.81	5.35	9.48	0.71	2.67	4.38		55	6.68		29.8	141	4.12	134	3.26	0.96	409	7.96	13.5	1.2	4.01	0.63	0.22	0.57	0.1	0.51	0.12	0.43	0.07
Guo et al., 2013	XRX-37	170	2	29.3647	88.7242					64.23	0.5	15.38	5.37		0.14	1.98	6.06	3.66	1.78	0.17	11.4	127	5.6	14	5.62	22.4		57.5	17.3		38.2	369	16.8	11.2	4.94	2.33	419	14.8	26.1	3.09	12.4	2.56	0.88	2.46	0.49	2.81	0.59	1.75	0.302
Guo et al., 2013	XRX-38	168	2	29.3637	88.7295					64.83	0.47	14.9	5.39		0.14	1.9	5.59	3.55	2.09	0.15	10.9	132	4.94	14.5	4.92	47.7		52.8	17		41.6	365	17.7	27.3	5.93	1.44	489	16.4	30.1	3.39	13.6	2.71	0.89	2.67	0.52	2.88	0.59	1.93	0.31
Guo et al., 2013	XRX-4	184	2	29.3657	88.6873			13.6633		67.47	0.33	15.89	3.83		0.04	1.36	3.95	3.41	2.47	0.09	3.03	29.4	9.83	4.07	2.32	348		97.8	8.15		22.9	180	8.82	111	4.65	0.9	353	7.9	14.8	1.73	6.73	1.31	0.4	1.22	0.24	1.46	0.3	0.94	0.15
Guo et al., 2013	XRX-40	172	2	29.3697	88.8445					64.02	0.67	14.35	6.48		0.14	2.41	5.43	3.26	1.72	0.16	16.12	115.54	7.46	15.24	5.4	21.1		60.8	15.2		26.08	429	18.7	16.04	3.72	0.94	314.2	5.34	13.22	1.98	9.08	2.5	0.8	2.82	0.46	3.02	0.66	2	0.3
Guo et al., 2013	XRX-5	180	1	29.3657	88.6365			13.228		65.16	0.53	16.25	4.66		0.11	1.71	5.08	4.22	1	0.12	10.04	94.2	6.53	11.77	4.52	541.61		40.79	17.57		36.03	395.96	17.91	119.11	9.41	2.15	318.47	16.33	31.12	3.61	13.9	2.98	0.97	3.02	0.47	2.98	0.63	1.91	0.28
Guo et al., 2013b	2003T534	13.15		30.7494	86.7215	0.719569	-15.3			55.09	1.47	12.7	6.82		0.1	8.37	6	2.18	6.49	0.76	19	148	396	33	263						588	932		722	33		2455	125	315	43	181	31	4.7	15	1.42	5.6	0.93	2.35	0.28
Guo et al., 2013b	2003T536	13.15		30.7494	86.7215	0.719778	-15.8			54.56	1.5	12.18	7.1		0.11	9.19	5.94	2.2	6.48	0.75	19	132	451	33	277						1511	927		722	35		2548	120	307	44	190	31	4.8	15	1.42	5.4	0.85	2.24	0.27
Guo et al., 2013b	2003T539	13.15		30.7494	86.7215	0.719802	-15.9			54.6	1.48	12.34	6.92		0.11	9.34	5.88	2.2	6.39	0.75	19	119	419	33	288						1924	923		747	33		2495	121	303	44	187	30	4.8	15	1.28	5.3	0.8	1.98	0.25
Guo et al., 2013b	C03	10.94		30.013	86.5431	0.72249	-14.4			53.64	1.63	11.85	6.71		0.11	10.79	6.99	2.12	5.14	1.02	18.94	128.77	686.39	53.81	386.42	41.16		74.5	21.43		1204.8	798.5	37.9	621.3	61.6		3516.4	150.3	388.2	54.7	236.9	48.7	6.8	26.4	2.36	9.61	1.32	2.98	0.35
Guo et al., 2013b	C10	10.94		30.013	86.5431	0.735415	-14.8			56.14	1.43	12.57	6.47		0.14	6.19	6.85	2.14	7.16	0.91	16.39	151.79	294.43	26.84	184.73	58.31		21.97	26.54		938.3	879.4	46.8	481.2	27.7		1973.2	131.6	327.8	46.3	182.5	42.4	5.55	23.9	2.67	10.12	1.53	3.64	0.46
Guo et al., 2013b	C25	10.94		30.013	86.5431	0.73622	-15.7			57.18	1.62	12.09	5.52		0.14	6.61	6.75	2.48	6.49	1.12	18.63	131.47	393.26	27.04	187.28	35.87		14.31	25.36		498.4	676.1	24.6	412.7	26.5		1785.4	102.7	241.8	34.1	139.3	29.5	3.39	14.8	1.36	6.29	0.95	2.14	0.28
Guo et al., 2013b	C76	10.94		30.013	86.5431	0.729715	-16.4			55.87	1.52	12.77	6.83		0.12	6.43	7.25	2.26	6.03	0.92	18.52	137.09	331.48	25.63	176.43	34.28		52.14	28.37		1046.3	612.8	31.6	979.5	55.4		2375.8	140.7	341.8	45.9	184.5	44.3	6.87	22.6	1.94	7.62	1.17	3.01	0.39
Guo et al., 2013b	CH4	10.94		30.013	86.5431	0.732453	-13.8			56.53	1.55	12.84	7.35		0.11	6.76	7.01	1.83	5.35	0.67	19.37	148.86	362.14	26.1	199.45	41.47		67.83	25.31		1358.7	1037.6	35.4	1082.9	52.5		3371.4	151.5	393.7	57.4	268.9	51.2	7.13	28.5	2.54	9.77	1.38	2.71	0.32
Guo et al., 2013b	CH7	10.94		30.013	86.5431	0.726344	-15.7			52.76	1.45	11.37	7.42		0.13	10.51	7.19	2.48	5.83	0.86	17.92	131.9	610.34	61.95	418.36	39.55		88.23	18.72		894.2	847.1	29.6	809.5	36.8		2433	148.5	410.1	61.2	275	59.3	8.18	34.7	3.11	9.6	1.34	2.76	0.37
Guo et al., 2013b	CV5	10.94		30.013	86.5431	0.732824	-15.2			55.76	1.31	13.35	6.56		0.13	5.94	6.98	2.35	6.37	1.25	17.11	146.68	282.83	25.26	143.52	67.36		13.8	26.29		826.9	758.1	39.7	645.3	46.5		1782.8	118.2	286.1	45.7	201.9	38.3	5.24	21.8	2.59	9.48	1.45	3.31	0.44
Guo et al., 2013b	CX38	10.94		30.013	86.5431	0.721363	-14.5			55.63	1.49	12.34	7.56		0.09	7.08	7.34	2.59	4.81	1.07	17.09	140.58	347.45	24.32	301.95	28.49		17.52	22.72		536.5	846.2	21.3	502.1	21.7		2001.5	114.6	291.4	42.1	186.5	36.3	5.11	18.7	1.65	6.59	1.04	2.4	0.31
Guo et al., 2013b	D509	21.18		31.0878	86.5312	0.715708	-11.6			55.36	1.78	12.17	5.84		0.09	7.05	5.91	1.16	9.45	1.19	21.6	156.47	343.86	29.64	246.91	50.28		72.12	27.03		326.4	821.3	13.8	1037.2	75.3		3691.2	253.4	478.2	59.6	222.5	28.1	4.28	13.6	1.32	4.63	0.67	1.52	0.18
Guo et al., 2013b	DC2	21.18		31.0878	86.5312	0.717602	-12.8			54.91	1.57	12.46	6.13		0.17	6.12	5.83	1.08	10.68	1.05	17.21	141.06	310.75	23.12	165.07	78.4		75.35	22.71		502.3	984.6	16.2	827.9	61.4		3247.1	348.1	659.3	78.6	298.2	39.7	8.17	23.9	2.15	5.83	0.87	1.86	0.24
Guo et al., 2013b	DG43	21.18		31.0878	86.5312	0.714572	-13.3			55.82	1.55	12.53	6.22		0.11	7.24	5.55	1.27	8.96	0.75	17.39	138.68	376.52	27.83	225.18	63.13		78.42	24.59		478.7	2242.5	24.1	1728.4	132.6		5618.3	429.7	893.5	108.2	397.1	56.8	6.32	17.5	1.95	5.71	0.74	1.83	0.22
Guo et al., 2013b	DY-7	21.18		31.0878	86.5312	0.712595	-11			56.52	1.46	12.08	5.72		0.12	6.83	5.56	1.61	9.24	0.86	18.57	132.53	361.44	26.09	182.14	55.96		61.96	25.43		471.3	1625.9	19.4	1318.5	89.6		4829.3	312.6	601.3	72.9	341.2	40.8	8.3	25.4	2.31	6.74	1.03	2.44	0.32
Guo et al., 2013b	G8	11.7	0.15	30.013	86.5431	0.728905	-15.2			57.81	1.12	13.67	6.24		0.11	5.9	6.44	2.68	5.29	0.74	18.47	136.23	278.46	31.38	169.27	61.84		58.32	27.21		725.4	636.7	34.2	838.1	33.8		2619.5	142.4	365.3	50.7	206.5	47.2	6.11	25.8	2.37	8.86	1.39	2.94	0.38
Guo et al., 2013b	MA75	15.29		30.8431	86.6558	0.72021	-15.2			54.57	1.4	11.89	7.37		0.11	9.22	5.67	1.7	7.18	0.89	20.14	142.85	560.16	28.03	386.34	71.38		86.41	27.92		1032.6	997.3	30.1	969	57.8		3891.4	224.9	437.3	51.1	192.4	24.7	3.32	10.3	1.15	5.19	0.83	1.88	0.25
Guo et al., 2013b	MG-3	15.29		30.8431	86.6558	0.719204	-13			56.91	1.65	12.57	5.74		0.06	6.56	6.03	1.43	8.07	0.98	16.9	124.08	309.52	22.96	189.75	46.29		71.58	22.19		610.8	862.5	19.2	523.7	51.3		2436.9	158.3	341.2	45.7	172.8	26.3	4.51	12.7	1.43	5.96	0.94	2.23	0.29
Guo et al., 2013b	MH69	15.29		30.8431	86.6558	0.720922	-12.4			56.36	1.61	12.59	5.58		0.1	9.34	5.72	1.62	6.47	0.61	22.59	157.91	526.2	31.52	373.48	76.35		89.37	35.61		883.1	985.8	27.9	1005.3	65.2		3739.7	235.7	459.3	57.6	191.2	31.9	3.65	13.6	1.03	4.15	0.62	1.53	0.21
Guo et al., 2013b	MH78	15.29		30.8431	86.6558	0.719678	-13.7			55.27	1.63	12.31	6.52		0.08	8.79	6.43	2.18	5.93	0.86	18.43	161.07	591.16	29.43	341.45	67.18		84.52	24.73		419.5	1326.7	24.3	891.5	51.9		3212	183.5	407.6	50.4	177.9	25.7	4.71	17.2	1.49	6.13	0.94	2.18	0.31
Guo et al., 2013b	MK09	15.29		30.8431	86.6558	0.7207	-13.7			55.14	1.61	11.97	6.75		0.08	8.11	5.52	2.46	7.49	0.87	17.11	133.73	461.3	25.46	315.08	69.41		80.02	23.77		522.3	1327.5	18.6	415.7	30.9		1809.6	141.7	316.5	39.8	147.2	26.9	4.24	14.3	1.31	5.02	0.8	1.97	0.26
Guo et al., 2013b	MR21	15.29		30.8431	86.6558	0.724901	-15.1			55.53	1.64	12.86	6.1		0.08	7.65	6.21	2.04	6.87	1.02	15.2	117.1	353.58	28.19	225.67	60.52		76.34	25.13		381.4	1036.8	11.6	472.3	34.2		2237.3	101.6	225.8	27.4	104.2	16.1	2.15	7.66	0.73	3.51	0.56	1.24	0.17
Guo et al., 2013b	MX5	15.29		30.8431	86.6558	0.718285	-13.7			56.13	1.37	13.03	5.98		0.06	8.08	6.12	1.63	6.86	0.74	18.43	147.68	423.91	28.54	278.3	64.67		95.3	26.45		702.2	913.6	33.8	621.7	68.2		2689.1	122.7	271.4	34.9	125.2	20.6	2.55	8.38	1.21	5.36	0.93	2.37	0.34
Guo et al., 2013b	MY1	15.29		30.8431	86.6558	0.722245	-13.5			53.79	1.69	12.04	6.85		0.07	7.38	7.37	1.72	8.15	0.94	17.62	131.45	356.44	24.17	231.86	63.93		77.36	20.58		734	1082.3	21.2	718.6	41.3		2701.8	212.5	441.7	55.2	224.1	33.4	4.27	13.6	1.48	6.2	0.98	2.24	0.31
Guo et al., 2013b	YA32	13.46		30.9385	86.3893	0.718886	-13			56.41	1.7	11.53	6.93		0.07	6.26	6.24	2.13	7.78	0.95	12.46	108.79	326.73	25.62	180.93	56.69		65.25	25.41		326.1	1167.9	28.7	653.1	41.3		2615.8	180.3	375.4	43.6	152.1	23.8	3.8	13.3	1.26	4.82	0.67	1.54	0.21
Guo et al., 2013b	YC08	13.46		30.9385	86.3893	0.718318	-13.9			56.74	1.44	11.86	6.01		0.09	6.59	4.96	1.67	9.36	1.28	13.21	116.84	318.85	27.51	163.17	58.48		59.52	25.93		462.8	1693.6	22.9	817.4	50.1		3581.3	191.4	398.1	52.8	175.3	26.7	4.89	17.5	1.65	5.99	0.7	1.61	0.22
Guo et al., 2013b	YE51	13.46		30.9385	86.3893	0.718179	-13.9			58.32	1.29	11.1	5.68		0.04	7.22	6.06	1.5	8.07	0.72	14.28	131.63	352.07	33.68	238.54	69.04		83.1	23.34		347.5	1039.3	17.4	1102.1	84.7		4109.6	251.8	483.2	58.9	211.5	28.7	4.68	18.2	1.71	6.13	0.76	1.85	0.23
Guo et al., 2013b	YF12	13.46		30.9385	86.3893	0.719431	-12.6			55.49	1.62	11.94	5.78		0.03	7.35	6.19	1.86	8.62	1.12	14.27	120.42	367.29	52.18	175.12	67.33		74.29	24.57		387.2	885.6	18.4	782.3	64.1		4283	312.7	534.5	57.8	203.1	26.4	5.97	16.2	1.44	6.01	0.88	1.95	0.28
Guo et al., 2013b	YG13	13.46		30.9385	86.3893	0.717192	-13.5			56.88	1.53	11.18	5.35		0.03	7.79	5.31	1.17	9.89	0.87	15.85	125.61	341.47	41.9	197.36	62.05		72.01	22.71		523.7	1825	25.6	1482.9	76.3		4418.2	332.8	591.3	65.6	213	27.5	6.21	16.9	1.52	6.17	0.98	2.32	0.31
Guo et al., 2014	AH602	1.07		35.5783	81.6809	0.707316	-3.19			47.11	2.51	14.1	9.99	5	0.15	8.46	8.68	3.32	4.41	1.25	27.6	157.8	172.3	31.7	98.4	42.5		114.3	20.4		109.2	1390	20.8	324	46.1		1896	116.2	217.8	22.4	86.5	14.9	4.13	11.28	1.37	5.63	0.97	2.48	0.29
Guo et al., 2014	AH605	1.07		35.5783	81.6809	0.709528	-9.92			46.15	2.39	13.78	11.43	5	0.16	8.52	8.28	3.49	4.74	1.06	23.7	234.9	205.1	32.8	109.7	37.6		125	21.6		113.2	1528	23.6	289	48.3		2003	97.3	174.2	19.5	60.8	13.6	3.37	7.85	0.84	4.79	0.99	2.95	0.41
Guo et al., 2014	AH607	1.07		35.5783	81.6809	0.709033	-4.88			47.9	1.9	13.91	10.79	5	0.18	7.31	9.21	3.53	4.35	0.93	24.2	162.3	171.6	39.4	115.3	35.8		117.4	23.7		98.5	1376	19.4	317	55.9		1675	137.7	312.8	37.2	126.1	18.9	4.73	13.57	1.36	5.84	0.95	2.38	0.32
Guo et al., 2014	AH609	1.07		35.5783	81.6809	0.707616	-3.01			48.12	1.93	14.24	9.61	5	0.14	6.85	10.21	3.26	4.45	1.19	17.9	136.2	175.9	27.5	93.6	33.1		109.2	18.5		99.6	1406	21.7	351	52.4		1948	95.8	197.4	24.1	86.9	14.6	4.22	11.87	1.59	6.32	1.06	2.29	0.34
Guo et al., 2014	AH615	1.07		35.5783	81.6809	0.710305	-4.59			47.4	2.17	14.55	10.37	5	0.17	9.04	7.27	3.44	4.52	1.06	28.3	190.6	229.5	35.2	113.8	38.3		132.6	21.3		110.6	1428	21.3	326	53.2		2014	103.6	204.2	23.7	92.3	15.1	4.09	12.68	1.57	6.39	1.01	2.56	0.37
Guo et al., 2014	AH618	1.07		35.5783	81.6809	0.709221	-10.17			46.73	2.38	13.85	10.23	5	0.16	8.76	8.43	3.76	4.74	0.96	24.4	215.3	169.8	41.3	104.5	39.7		105.5	21.9		104.5	1471	22.4	305	49.6		2101	105.9	192.6	21.3	73.8	12.3	2.94	9.02	1.08	4.83	0.94	2.45	0.33
Guo et al., 2014	CT05	5.2		35.2348	79.4773	0.707945	-8.13			52.45	1.44	14.33	7.29	1	0.08	5.86	7.19	4.35	5.62	1.39	18.4	132.8	263.6	31.7	137.2	36.3		115.2	21.7		104.4	1328	23.9	416.2	33.6		2107	105.5	211.8	22.3	71.9	12.8	2.77	8.73	1.21	5.64	1.02	2.36	0.32
Guo et al., 2014	CT09	5.2		35.2348	79.4773	0.708158	-5.84			55.04	1.52	14	7.5	1	0.13	5.51	6.47	3.85	5.3	0.69	15.2	124.1	202.3	29.6	103.6	28.4		124.7	18.2		113.8	1720	25.7	392.5	37.3		3189	130.1	263.3	31.2	108.5	14.9	3.54	11.28	1.44	5.83	0.92	2.31	0.3
Guo et al., 2014	CT12	5.2		35.2348	79.4773	0.71185	-7.69			52.62	1.58	13.38	8.66	1	0.12	6.38	8.19	4.15	4.18	0.74	22.4	143.5	376.9	39.4	167.9	28.5		168.5	23.5		107.9	1817	28.3	517.4	41.2		2873	141.7	265.4	30.1	82.8	15.2	3.45	12.26	1.31	5.09	0.94	2.34	0.31
Guo et al., 2014	CT17	5.2		35.2348	79.4773	0.708177	-6.44			53.32	1.65	13.19	8.81	1	0.14	6.43	7.29	3.76	4.84	0.56	24.7	162.3	259.2	34.8	172.8	41.2		152.1	23.3		87.3	1125	31.7	429.7	25.8		1864	68.8	152.7	18.4	60.5	11.3	2.51	8.08	1.13	5.24	0.92	2.29	0.29
Guo et al., 2014	CT23	5.2		35.2348	79.4773	0.707667	-3.77			50.43	1.76	13.61	8.16	1	0.11	6.45	7.83	4.79	5.82	1.06	21.9	157.2	346.3	44.6	159.3	27.9		162.3	22.4		131.2	1543	33.6	468.3	30.9		2439	128.6	251.2	26.8	90.1	13.7	3.21	9.46	1.15	4.97	0.86	2.23	0.28
Guo et al., 2014	HS028	1.28		35.414	82.9208	0.710815	-7.81			54.16	1.64	13.18	9.43	4	0.14	5.93	7.7	3.69	3.48	0.65	26.7	201.9	395.4	39.1	340.8	36.3		90.7	20.3		89.7	760	24.6	317.1	20.3		1071	76.5	126.1	13.5	46.7	9.63	2.04	6.71	0.86	4.65	0.86	1.96	0.28
Guo et al., 2014	HS041	1.28		35.414	82.9208	0.707841	-7.4			53.18	1.68	14.67	9.36	4	0.15	5.37	7.56	3.64	3.68	0.71	31	153.1	138.2	33.4	87.3	41.8		129.6	21.4		130.5	1246.7	25.6	543.1	46.9		1548.3	102.3	189.1	18.4	51.6	10.3	2.24	8.15	1.05	4.78	0.91	2.23	0.31
Guo et al., 2014	HS046	1.28		35.414	82.9208	0.710373	-10.38			53.43	1.76	14.34	9.17	4	0.12	4.74	8.78	3.71	3.26	0.69	16.6	117.4	237.1	32.5	121.6	29.8		96.4	18.5		98.3	849.2	31.9	618.5	34.1		1321.6	96.7	183.4	19.3	58.2	11.8	2.18	7.38	0.94	4.67	0.85	2.14	0.28
Guo et al., 2014	HS047	1.28		35.414	82.9208	0.70941	-7.3			53.33	2.11	14.81	9.5	4	0.16	5.02	7.58	2.89	3.73	0.87	19.5	124.3	210.6	30.8	183.7	27.5		103.8	19.6		72.6	751.7	27.4	508.2	42.9		1208.6	118.4	239.2	25.8	69.3	13.2	2.66	8.22	1.01	4.86	0.92	2.21	0.29
Guo et al., 2014	KX44	3.24		36.1615	78.9391	0.708125	-8.93			48.75	1.9	12.76	9.12	8	0.15	8.83	8.08	2.89	5.71	1.8	23.5	231.7	306.7	32.9	183.5	39.6		156.2	18.3		263.3	1921	28.4	536	37.2		2451	117.8	251.3	30.7	122.5	28.1	6.53	17.2	2.08	8.22	1.34	3.17	0.36
Guo et al., 2014	KX49	3.24		36.1615	78.9391	0.708626	-10.53			48.52	1.86	12.79	9.15	8	0.14	8.77	8.56	2.9	5.77	1.54	23.6	250.7	283.1	31.3	173.6	40.8		141.4	19		269.1	1846	31.7	472	40.6		2369	115.3	248.6	31.4	125.3	29.3	6.46	17.11	2.03	8.75	1.51	3.25	0.38
Guo et al., 2014	KX51	3.24		36.1615	78.9391	0.708228	-11.21			48.62	1.54	13.55	9.3	8	0.12	8.25	8.91	3.64	4.68	1.39	30.7	262.3	393.2	40.5	148.3	36.8		201.3	21.1		241.7	1729	32.5	520	27.9		2687	132.3	241.6	29	95.4	19.6	4.02	7.31	0.94	4.79	0.88	1.96	0.29
Guo et al., 2014	KX62	3.24		36.1615	78.9391	0.708305	-9.99			48.55	1.91	12.74	9.23	8	0.15	8.83	8.52	3.48	5.31	1.28	29.3	254.5	339.7	36.5	168.2	36.4		219.8	22.3		166.4	1783	28.3	418	33.9		2361	136.2	281.5	34.9	121.6	23.8	4.83	12.29	1.45	6.63	1.28	2.69	0.35
Guo et al., 2014	KX80	3.24		36.1615	78.9391	0.707949	-9.52			49.47	1.48	13.71	9	8	0.13	8.29	9.32	2.49	4.86	1.26	28.1	251.4	378.4	38.9	152.8	35.1		208.5	21.6		238.8	1803	33.6	516	28.4		2715	131.8	247.2	31.5	114.7	21.8	5.81	15.26	1.76	7.32	1.1	2.38	0.31
Guo et al., 2014	KY01	0.56		35.3169	81.8527	0.708102	-7.58			55.58	1.36	14.53	7.69	3	0.11	5.68	6.43	3.17	4.51	0.94	17.8	156.4	253	25.6	172.1	27.7		156.5	18.9		81.5	1483	26.9	382	46.9		2516	115.2	264.1	31.9	101.4	21.7	4.48	14.17	1.56	7.32	1.16	2.35	0.31
Guo et al., 2014	KY02	0.56		35.3169	81.8527	0.709311	-6.28			52.26	1.83	14.26	8.27	3	0.12	4.95	9.73	3.36	4.37	0.85	18.9	122.5	343.8	31.3	145.7	34.8		167	23.5		123.9	2167	36.2	476	45.1		2361	92.9	187.2	23.4	79.3	18.7	3.16	13.08	1.43	7.27	1.28	2.79	0.37
Guo et al., 2014	KY03	0.56		35.3169	81.8527	0.708453	-8.4			54.71	1.64	14.13	7.58	3	0.13	5.77	7.32	3.23	4.25	1.24	16.2	151.8	182.5	22.8	132.6	23.9		125.8	21.3		117.4	1820	21.8	525	54.7		1729	103.8	236.4	28.7	90.1	18.3	3.46	13.75	1.41	8.52	1.33	2.82	0.34
Guo et al., 2014	KY06	0.56		35.3169	81.8527	0.70947	-9.96			56.46	1.15	13.49	8.62	3	0.14	6.12	4.83	3.04	4.84	1.31	27.5	180.2	367.1	39.4	219.3	51.3		219.2	24.7		103.2	2280	33.4	551	48.7		2854	61.5	136.3	15.6	57.1	10.9	2.27	10.52	1.38	6.58	1.05	2.66	0.34
Guo et al., 2014	PL18	1.2		36.3225	81.7464	0.708	-12.18			51.37	2.05	14.47	8.69	9	0.13	5.08	9.46	3.61	4.08	1.06	18.2	116.6	251.3	41.7	219.2	26.8		105.3	23.5		93.7	1273	24.8	510	54.9		1161	160.7	312.5	31.8	112.3	18.2	4.25	13.28	1.76	6.35	1.03	2.31	0.32
Guo et al., 2014	PL3	1.2		36.3225	81.7464	0.708556	-4.1			53.79	2.15	15.78	8.43	9	0.12	4.39	6.73	3.49	4.27	0.85	17.8	114.3	91.6	28.4	97.9	25.3		101.2	25.7		112.6	964	23.3	349	41		1359	124.7	251.3	24.1	81.4	14.6	3.89	8.78	1.23	5.49	0.82	2.18	0.29
Guo et al., 2014	PL43	1.2		36.3225	81.7464	0.708839	-6.4			52.63	2.18	15.62	7.84	9	0.12	4.64	7.41	3.46	4.78	1.32	21.3	103.7	167.2	31.5	136.1	28.9		120.5	24.8		113.8	982	22.9	378	39.5		1341	113.4	231.1	22.9	78.7	13.2	3.46	9.53	1.21	5.02	0.78	2.13	0.27
Guo et al., 2014	PL53	1.2		36.3225	81.7464	0.708757	-8.94			50.3	1.79	13.25	9.33	9	0.12	8.15	8.4	3.45	4.39	0.83	24.3	158.6	395.4	53.5	312.6	36.1		126.8	21.3		86.4	1028	25.6	415	38.4		1382	158.3	317.5	34.6	116.8	19.2	4.97	14.23	1.67	7.43	1.15	2.63	0.32
Guo et al., 2014	PL61	1.2		36.3225	81.7464	0.708823	-11.4			49.52	1.83	13.43	9.5	9	0.11	8.1	8.51	3.17	4.89	0.94	25.7	162.3	408.2	51.8	295.3	34.8		131.4	18.6		87.5	1134	27.1	482	36.3		1246	172.8	342.6	35.7	109.5	20.2	5.13	14.66	1.72	7.14	1.02	2.45	0.28
Guo et al., 2014	PL61	1.2		36.3225	81.7464	0.708823	-11.4			49.52	1.83	13.43	9.5	9	0.11	8.1	8.51	3.17	4.89	0.94	25.7	162.3	408.2	51.8	295.3	34.8		131.4	18.6		87.5	1134	27.1	482	36.3		1246	172.8	342.6	35.7	109.5	20.2	5.13	14.66	1.72	7.14	1.02	2.45	0.28
Guo et al., 2014	PL92	1.2		36.3225	81.7464	0.708947	-5.84			51.25	1.94	14.36	8.77	9	0.11	5.19	9.38	3.67	4.29	1.04	20.5	131.4	263.8	38.6	182.5	31.7		98.6	20.4		91.3	1120	27.6	534	51.5		1293	176.2	344.5	36.8	116.9	21.8	4.94	13.27	1.53	5.49	0.96	2.36	0.29
Guo et al., 2014	QS12	5.23		35.4653	80.128	0.707802	-9.33			50.3	1.35	15.36	9.63	2	0.14	5.74	9.32	3.18	3.6	1.38	13.4	157.9	117.3	26.2	101.5	31.7		182.3	22.1		93.7	1428	18.3	319	41		1823	132.1	276.5	33.4	116.9	18.3	3.86	15.27	1.43	6.09	1.21	2.68	0.36
Guo et al., 2014	QS18	5.23		35.4653	80.128	0.709635	-7.79			48.75	1.67	14.75	10.45	2	0.11	7.33	8.75	3.48	3.72	0.99	18.9	179.1	338.1	29.7	152.9	28.3		141.8	23.7		108.6	1752	28.7	368	29.4		2520	92.5	191.7	23.8	79.4	15.6	3.31	13.74	1.42	7.11	1.15	2.73	0.35
Guo et al., 2014	QS19	5.23		35.4653	80.128	0.712826	-9.15			49.66	1.4	13.27	10.77	2	0.13	6.23	9.58	3.21	4.3	1.44	23.8	169.5	236.7	33.9	162.2	32.3		132.3	19.3		127.5	1647	28.6	417	33.9		2736	104.3	203.2	23.7	78.3	18.6	3.31	14.16	1.47	6.11	1.14	2.62	0.39
Guo et al., 2014	QS23	5.23		35.4653	80.128	0.713133	-5.99			47.97	1.58	14.61	10.33	2	0.13	7.09	9.1	3.3	4.64	1.25	22.1	201.7	352.6	36.2	135.8	32.6		159.3	18.6		119.3	1718	23.5	393	30.8		2696	101.4	221.7	26.9	77.2	14.3	3.74	15.29	1.68	8.12	1.27	2.85	0.37
Guo et al., 2014	QS24	5.23		35.4653	80.128	0.710197	-9.49			49.62	1.72	14.95	10.09	2	0.12	7.16	8.38	3.03	3.8	1.12	22.7	182.6	369.5	34.1	147.6	25.4		146.2	21.9		126.2	1678	31.6	401	37.4		2189	71.8	152.2	20.6	69.3	10.9	2.71	11.68	1.29	6.18	1.02	2.52	0.31
Guo et al., 2014	QS27	5.23		35.4653	80.128	0.708515	-5.74			48.8	1.5	13.88	10.86	2	0.12	6.49	9.84	3.38	3.86	1.26	25.6	172.4	251.8	37.3	143.3	26.8		127.5	20.5		114.2	1731	31	362	35.7		2374	113.7	247.9	29.8	101.7	19.5	4.14	15.43	1.65	5.78	0.96	2.43	0.33
Guo et al., 2014	YS05	3.78		35.7761	79.3309	0.707615	-4.37			50.12	1.58	13.87	8.89	7	0.14	6.13	8.28	2.19	7.23	1.57	25.8	236.2	213.7	36.5	132.1	34.9		207.9	19.4		261.9	1872	27.9	448	37.9		3059	172.7	314.6	32.8	120.3	23.5	5.94	12.21	1.67	7.83	1.26	2.53	0.31
Guo et al., 2014	YS07	3.78		35.7761	79.3309	0.70812	-4.7			57.49	1.42	14.18	6.04	7	0.12	4.02	6.87	3.21	5.86	0.79	14.9	128.7	163.4	22.6	91.8	20.3		119.7	22.6		127.8	1417	18.4	410	28.5		2823	135.8	277.6	28.2	86.3	15.1	3.43	9.05	1.15	5.23	0.74	1.68	0.23
Guo et al., 2014	YS74	3.78		35.7761	79.3309	0.709988	-6.8			51.37	1.44	14.61	8.45	7	0.13	5.87	7.19	3.73	6.27	0.94	21.3	168.5	172.9	28.4	102.3	28.6		138.3	24.1		247.3	1381	30.5	393	31.8		1964	211.4	409.3	45.6	162.7	27.8	6.48	14.29	1.87	8.23	1.32	2.72	0.35
Guo et al., 2014	YS78	3.78		35.7761	79.3309	0.707901	-4.7			57.26	1.35	13.05	7.22	7	0.11	5.69	5.67	3.26	5.18	1.21	23.7	177.1	185	31.9	94.7	25.3		90.2	20.5		231.4	1565	35.8	416	29.4		3210	198.5	382.9	40.1	131.3	24.7	5.32	13.15	1.69	7.34	1.13	2.46	0.3
Guo et al., 2014	YS79	3.78		35.7761	79.3309	0.708437	-3.39			57.03	1.36	14.72	6.54	7	0.11	4.28	6.38	3.45	5.36	0.77	15.2	139.5	138.6	24.1	89.3	22.7		126.6	18.9		135.9	1329	17.3	329	30.6		2172	232.9	426.4	50.2	171.3	31.4	6.82	15.26	1.79	8.05	1.27	2.43	0.28
Guynn et al., 2006	AP052904-A	178	3	31.77	92.29
Guynn et al., 2006	AP060604-A	179	3	31.96	92.16
Guynn et al., 2006	AP061504-B	175	4	32.19	91.7
Guynn et al., 2006	AP061604-B	174	4	32.11	91.71
Guynn et al., 2006	AP062104-A	171.8	3.8	32.07	92.27
Guynn et al., 2006	JG061504-7	183	3	32.2	91.71
Guynn et al., 2006	JG062004-4	170.7	2.7	31.93	92.24
Guynn et al., 2006	JG062204-1	178	3	32.12	92.36
Hacker et al., 2000	HornblendeA	35	1	34.37	89.28
Hacker et al., 2000	San xenocrystA	2.5	0.2	34.4	89.2333
Hacker et al., 2000	San xenocrystB	3.2	0.1	34.4	89.2333
Haider et al., 2013	DC-23	119	2.3	30.9944	90.9415
Haider et al., 2013	DC-24	111.8	2.4	31.053	90.8194
Haider et al., 2013	DC-28	124	3.6	31.3746	90.172
Haider et al., 2013	DC-31	117.5	3.9	31.4677	89.9208
Haider et al., 2013	DC-33	111.6	0.5	31.3733	90.0143
Haider et al., 2013	DC-38	58.3	1.9	30.9527	90.7118
Haider et al., 2013	DC-40	123.3	4.2	30.9579	90.8623
Haider et al., 2013	DC-41	124.8	4.2	30.9366	90.9395
Haider et al., 2013	H-10	130.4	1	31.2182	90.0758
Haider et al., 2013	H-11	63.1	2.5	31.1943	90.0828
Haider et al., 2013	H-14	117.4	1.3	31.3136	90.1761
Haider et al., 2013	H-19	85.5	1.5	31.2078	89.7781
Haider et al., 2013	H-20	83.7	1.1	31.2208	89.7804
Haider et al., 2013	H-23	117	2.8	31.4227	89.8048
Haider et al., 2013	H-29	111.7	1.6	31.4433	89.8982
Haider et al., 2013	H-30	112.8	2.3	31.4685	89.8959
Haider et al., 2013	H-33	123.3	3.2	31.2879	90.151
Haider et al., 2013	H-35	120.8	1.5	31.309	90.1469
Haider et al., 2013	H-49	103.3	2	31.0037	90.7381
Haider et al., 2013	H-50	57.7	5.6	31.1043	90.7746
Haider et al., 2013	H-7	127	1.6	31.2753	90.082
Haider et al., 2013	H-72	108.9	0.8	31.143	90.5319
Haider et al., 2013	H-87	114.6	1.8	31.1861	90.3544
Hao et al., 2016a	13GZ02	152		32.889	84.084					64.14	0.7	17.12	4.72		0.08	1.26	4.68	3.22	2.9	0.21	4.44	25.2	190	7.42	15.4	19.6		105	25.8	1.87	101	654	8.51	290	20.7		751	37.6	77.3	8.96	33.4	6.24	1.84	4.77	0.54	2.32	0.35	0.73	0.09
Hao et al., 2016a	13GZ03	151.7	1.3	32.889	84.084	0.70717	-4			64.35	0.68	16.89	4.63		0.08	1.21	4.75	3.69	2.71	0.21	4.11	26.6	42.9	6.45	3.51	3.78		112	26.1	2.14	101	634	7.86	323	23.2		658	47.4	97.1	11.6	43.9	7.83	2.03	5.6	0.6	2.35	0.32	0.63	0.08
Hao et al., 2016a	13GZ04	152		32.889	84.084					64.55	0.66	16.81	4.92		0.12	1.2	4.73	3.22	2.79	0.2	4.27	23.5	43.2	6.93	4.56	4.44		115	26.5	2.19	97.3	640	6.8	63	22		696	47.1	93.9	11.2	41.9	7.35	1.96	5.22	0.54	2.08	0.27	0.52	0.06
Hao et al., 2016a	13GZ05	152		32.889	84.083	0.7072	-3.9			66.07	0.6	16.42	3.99		0.07	1.01	4.3	3.46	3.02	0.17	3.57	22.9	21.4	5.51	3.11	3.43		103	25	1.84	99.5	610	6.94	287	22.7		676	33.4	66.8	8.24	32	6.32	1.78	4.71	0.53	2.11	0.28	0.52	0.06
Hao et al., 2016a	13GZ08-1	152		32.889	84.048					63.26	0.73	17.29	5.03		0.08	1.31	5.05	3.33	2.75	0.22	4.86	28.2	232	7.91	18.5	23.2		108	25.9	2.05	100	651	8.81	286	20.6		621	40.7	84.5	9.75	37.1	6.79	1.92	5.05	0.57	2.43	0.36	0.78	0.1
Hao et al., 2016a	13GZ08-2	152		32.889	84.048	0.70701	-3.7			63.62	0.72	17.09	5.12		0.11	1.29	4.91	3.23	2.77	0.21	4.8	24.4	68.8	7.19	4.27	4.2		113	26.2	2.13	104	635	7.98	305	20.6		647	47.4	92.1	11.1	41.5	7.4	1.94	5.41	0.58	2.36	0.33	0.66	0.08
Hao et al., 2016a	13GZ09-1	153	1.9	32.79	84.204	0.70712	-5.5			60.14	0.81	16.54	7.08		0.21	3.1	5.26	2.74	2.66	0.18	16.7	111	101	14.2	15.6	6.98		87.8	20.1	2.47	107	460	16.8	166	13.8		615	24	50	5.94	23.2	4.77	1.33	4.25	0.63	3.49	0.69	1.84	0.28
Hao et al., 2016a	13GZ09-2	153		32.79	84.204	0.7071	-5.2			59.9	0.82	16.6	7.03		0.18	3.2	5.28	2.69	2.75	0.18	17.4	117	72.2	14.3	15.2	7.65		90.3	20.5	2.47	110	459	17.4	183	14.2		638	24	48.1	6.01	23.9	4.9	1.34	4.35	0.65	3.64	0.73	1.9	0.28
Hao et al., 2016a	13GZ10-1	153		32.784	84.204					60.18	0.87	16.48	6.9		0.16	3.12	5.13	2.44	2.78	0.2	17.6	106	282	14	27.9	27		84.7	19.5	2.49	103	456	18.8	194	12.5		624	38	74.1	8.93	33.4	6.07	1.56	5.1	0.72	3.97	0.78	2.06	0.31
Hao et al., 2016a	13GZ10-2	153		32.784	84.204	0.70743	-5.4			60.43	0.86	16.5	6.79		0.15	3.09	5.45	2.48	2.73	0.19	18.5	104	198	13.7	24.7	23.7		86.7	19.4	2.42	102	422	19	194	12.5		568	25.6	54.3	6.63	26.3	5.27	1.56	4.65	0.69	3.94	0.79	2.12	0.32
Hao et al., 2016a	13GZ11-1	152.7	1.4	32.777	84.199	0.70776	-5.2			56.91	0.98	17.16	7.89		0.18	3.54	6.08	2.74	2.49	0.24	21.1	128	90.9	14.9	13.5	5.95		103	20.6	2.75	90.6	497	21.8	172	12.8		564	29.9	62	8.13	32.5	6.47	1.67	5.64	0.83	4.67	0.92	2.41	0.35
Hao et al., 2016a	13GZ11-2	153		32.777	84.199					57.13	1.01	17.06	7.87		0.18	3.5	6.22	2.62	2.46	0.25	21.4	127	52.4	14.5	11.2	8.22		102	20.5	2.73	89.5	443	23.7	183	13.2		553	29.7	64.2	8.13	32.7	6.65	1.69	5.89	0.87	4.87	0.97	2.52	0.37
Hao et al., 2016a	13GZ13-1	148		32.714	84.234					59.2	0.91	16.76	7.38		0.15	3.39	5.49	2.52	2.63	0.21	19	125	202	16.7	32.7	21.8		88.2	20.6	2.51	105	467	20	178	14.3		624	33.3	65.8	7.79	29.9	5.77	1.48	5.03	0.75	4.16	0.82	2.17	0.32
Hao et al., 2016a	13GZ13-2	148		32.714	84.234	0.70738	-5.3			59.41	0.88	16.61	7.12		0.15	3.66	5.39	2.5	2.78	0.18	19.4	119	67.6	17	20.3	7.45		89.1	20.3	2.61	107	474	19.3	176	13.9		655	29.7	57.9	7.22	27.7	5.44	1.48	4.81	0.7	3.99	0.8	2.13	0.31
Hao et al., 2016a	13GZ15-1	148.4	2.5	32.708	84.234	0.70714	-5.4			58.38	0.87	16.49	7.43		0.18	3.81	5.61	2.4	2.92	0.22	20.8	141	102	18.3	22.6	15.8		91.4	20.7	2.75	114	459	21.6	189	16		691	39.7	75.2	8.94	33.7	6.29	1.53	5.47	0.79	4.5	0.91	2.42	0.36
Hao et al., 2016a	13GZ15-2	148		32.708	84.234					58.3	0.85	16.67	7.64		0.18	3.77	5.54	2.51	2.9	0.2	21.4	144	117	17.9	21	15.7		90.1	20.4	2.64	108	428	19.9	177	16.3		641	33.1	63.3	7.59	28.8	5.49	1.4	4.86	0.71	4.08	0.82	2.22	0.33
Hao et al., 2016a	13GZ19	148		32.889	84.048	0.70669	-4.2			64.78	0.63	16.59	4.67		0.1	1.57	3.77	3.14	3.37	0.14	8.93	48.4	244	9.01	24.7	28.9		75.2	20.3	1.85	126	613	9.23	158	13.4		923	26.1	51.1	5.98	22.3	4.04	1.18	3.13	0.41	2.06	0.38	0.94	0.14
Hao et al., 2016a	13GZ20-1	111.72	0.9	32.723	84.173	0.70646	0.1			67.09	0.45	15.31	3.81		0.08	0.34	2.11	5.47	3.03	0.14	6.81	64.1	263	7.07	41.4	39.4		37.3	11.2	1.39	76.1	438	8.62	131	6.81		980	21.5	39	4.52	16	2.74	0.73	2.33	0.33	1.85	0.36	0.97	0.15
Hao et al., 2016a	13GZ20-2	112		32.723	84.173	0.70653	0.2			68.24	0.44	15.32	3.68		0.07	0.49	1.7	4.85	2.9	0.14	6.8	51.1	209	6.9	24.1	33		39.4	12	1.45	85.3	472	8.61	130	6.91		917	21.8	41	4.57	16.3	2.82	0.75	2.42	0.33	1.87	0.38	1.01	0.15
Hao et al., 2016a	13GZ21-1	112		32.724	84.173	0.70538	-0.6			65.33	0.56	14.86	4.79		0.08	0.58	3.76	4.2	2.77	0.2	10.1	114	331	10.9	45.5	68.1		45	14.1	1.71	91.4	484	8.46	112	5.95		1029	24	44.9	5.12	18.6	3.14	0.81	2.57	0.33	1.82	0.35	0.93	0.14
Hao et al., 2016a	13GZ21-2	112		32.724	84.173					66.04	0.58	15.13	4.56		0.07	0.91	3.38	4	2.96	0.16	10.1	106	310	9.99	41.3	61.9		45.9	14.7	1.64	104.5	502	8.23	118	6.39		964	24.1	43.8	5.02	18.1	3.01	0.78	2.42	0.32	1.75	0.35	0.92	0.14
Hao et al., 2016a	13GZ22-1	148		32.768	84.025	0.70694	-4.3			66.18	0.47	16.26	3.27		0.08	0.91	3.16	3.77	3.26	0.1	3.91	17.5	71.1	4.83	4.14	3.61		91.6	24.2	1.45	107	635	4.63	227	16.2		748	34.8	63.5	7	24.4	3.78	1.07	2.71	0.28	1.17	0.19	0.43	0.06
Hao et al., 2016a	13GZ23	148		32.768	84.023	0.70861	-7.6			63.53	0.62	17.15	4.43		0.08	1.6	4.24	3.51	2.91	0.13	7.11	32	43.4	7.8	5.68	4.35		87.4	22.8	1.51	104	534	8.27	189	12.1		683	25.9	49.2	5.74	21.1	3.87	1.09	3.14	0.4	1.99	0.35	0.82	0.12
Hao et al., 2016a	13GZ24-1	148		32.768	84.022					65.74	0.49	16.41	3.3		0.06	0.93	3.27	3.91	3.17	0.1	3.83	20	247	6.08	19.5	23.8		92.9	24.9	1.44	106	656	4.84	250	16.8		737	36	64.9	7.26	25.1	3.94	1.12	2.77	0.28	1.21	0.19	0.45	0.06
Hao et al., 2016a	13GZ24-2	148		32.768	84.022					65.94	0.49	16.05	3.45		0.1	0.9	2.97	3.79	3.52	0.11	3.8	18.3	42.4	4.44	6.03	4.61		68.7	23.2	1.5	121	615	4.73	227	15.9		755	35	64	7.13	24.8	3.89	1.07	2.77	0.28	1.19	0.19	0.44	0.06
Hao et al., 2016a	13GZ25	148.1	1.5	32.769	84.021	0.70856	-7.6			64.95	0.6	16.73	4.39		0.09	1.6	4	3.22	3.03	0.13	6.53	35.8	38.8	7.9	6.72	6.25		83.1	22.4	1.6	113	475	9.39	201	11.5		671	30.8	58.8	6.68	23.8	4.09	1.09	3.25	0.4	2.02	0.35	0.85	0.12
Hao et al., 2016b	ZB140-1	122.9	1.9	32.3801	84.7966	0.7056	-1.92	0.745	8.46667	58.37	1.02	16.33	7.74		0.18	3.15	5.98	2.88	2.82	0.2	20.28	170	39.9	16.6	12.9	19.8		86.5	19.5	2.72	106	469	25.3	207	15.8	4.99	522	39.9	78.3	9.48	36.1	6.8	1.57	5.93	0.87	5	1.02	2.76	0.42
Hao et al., 2016b	ZB140-2	121.3	0.9	32.3801	84.7966	0.7055	-0.49	1.60526	8.23	52.22	1.44	16.58	10.2		0.19	4.65	7.98	2.84	1.75	0.2	32.49	313	91.5	22.1	18.2	20.2		108.1	20.3	2.98	62.5	546	22.5	137	11.9	3.05	439	28.3	57.2	7.23	29.2	5.91	1.67	5.32	0.81	4.63	0.94	2.51	0.37
Hao et al., 2016b	ZB140-3	122		32.3801	84.7966					52.68	1.43	16.54	9.98		0.21	4.42	7.22	3.12	2.12	0.22	32.67	295	32.3	22	11.4	11.2		96.4	20.3	3.06	77	494	23.2	152	12.5	2.42	470	32.2	64.4	8.13	32.4	6.45	1.81	5.67	0.84	4.83	0.97	2.61	0.38
Hao et al., 2016b	ZB140-4	122		32.3801	84.7966	0.7062	-0.72			54.65	1.11	16.89	9.07		0.2	4.23	6.23	3	2.03	0.23	24.71	220	28.3	21.5	11.9	26.8		93.1	20	3	69.5	738	21.2	146	12.3	3.56	526	32.5	65.8	8.23	32.9	6.28	1.66	5.42	0.77	4.45	0.89	2.36	0.35
Hao et al., 2016b	ZB140-5	122		32.3801	84.7966	0.7053	-0.01			52.44	1.44	16.62	9.98		0.21	4.57	8.2	2.81	1.9	0.21	33.3	309	55.6	22.5	9.9	9.4		117	19.9	3.28	65.8	516	23	149	12.4	3.57	344	29.5	59.5	7.57	30.3	6.22	1.69	5.58	0.85	4.88	0.99	2.6	0.38
Hao et al., 2016b	ZB140-6	122		32.3801	84.7966					57.86	1.05	16.42	7.87		0.16	3.32	6.04	2.86	2.76	0.21	20.72	177	150.4	17.9	20.9	28.8		83.2	19.8	2.81	107.9	532	26.1	174	15.4	4.51	553	45.1	87.2	10.48	39.7	7.3	1.67	6.12	0.91	5.22	1.06	2.85	0.42
Hao et al., 2016b	ZB140-7	122		32.3801	84.7966					54.48	1.09	16.93	8.94		0.19	4.06	7.36	2.8	2.2	0.22	26.09	222	37.7	22.2	11.4	26		93.2	19.9	2.91	75.7	644	22.1	139	12.2	3.37	503	33.3	66.6	8.28	32.8	6.29	1.63	5.4	0.79	4.57	0.93	2.49	0.37
Hao et al., 2016b	ZB141-1	122.2	1.8	32.3801	84.7966		-2.63		8.42273	57.01	0.86	16.38	6.78		0.13	2.7	4.69	2.86	1.98	0.16	17.77	152	59.9	13.3	11	16		74.2	18.6	2.2	75.2	415	19.7	148	9.3	5.09	398	28.9	57.5	7.08	27.2	5.13	1.27	4.45	0.67	3.93	0.82	2.27	0.34
Hao et al., 2016b	ZB141-2	122		32.3801	84.7966	0.7061	-3.16			55.68	1.11	17.08	8.7		0.19	3.72	6.74	2.49	2.12	0.18	26.05	230	41.6	17.2	11.3	5.3		105	19.9	2.889	75.5	516	20.8	146	10.7	3.031	447	31.9	62.8	7.688	29.7	5.679	1.505	5.064	0.753	4.334	0.891	2.393	0.355
Hao et al., 2016b	ZB141-3	122		32.3801	84.7966					55.48	1.16	16.91	8.78		0.2	3.7	6.76	2.48	2.12	0.19	25.01	224	75.1	16.9	11.2	6.5		103	19.5	2.83	76.4	518	21.6	133	10.8	2.82	459	29.3	58.6	7.32	28.8	5.66	1.5	5.03	0.76	4.47	0.92	2.47	0.37
Hao et al., 2016b	ZB142-1	122		32.3801	84.7966	0.706	-3.31			56.1	1.11	17	8.54		0.2	3.49	6.66	2.85	2.2	0.19	24.86	215	40.4	15.5	10.5	10.1		91.3	20.1	2.91	78.2	515	24.6	145	11.5	2.96	469	33.1	66	8.17	31.8	6.19	1.49	5.52	0.83	4.84	1.01	2.7	0.41
Hao et al., 2016b	ZB142-2	122		32.3801	84.7966					56.11	1.07	16.99	8.42		0.19	3.46	6.7	2.5	2.1	0.19	23.84	209	40.6	15.2	11.4	10.6		94.1	20.1	2.82	74	514	22.5	147	11.6	2.55	458	33.1	65.3	8.08	31	5.92	1.5	5.25	0.79	4.58	0.94	2.54	0.38
Hao et al., 2016b	ZB142-3	121.8	1.7	32.3801	84.7966	0.7059	-2.31	-1.3		60.15	0.73	16.94	6.84		0.2	2.46	5.83	2.69	2.21	0.18	14.11	122	44.3	9.28	6.05	53.4		91.5	18.6	2.57	70.5	524	19.5	161	11.3	1.91	518	33.8	66	7.85	29.9	5.5	1.38	4.72	0.7	3.98	0.83	2.22	0.34
Hao et al., 2018	ZB78-1	106		32.4808	84.2759	0.7047	2.7			55.97	1.82	13.18	10.45		0.14	1.15	5.55	4.07	2.26	0.36	19.8	125	12.3	19	5.81						39.7	201	35.8	302	10		221	20.1	46.4	6.18	26.8	6.27	1.94	6.58	1.11	6.82	1.46	3.99	0.58
Hao et al., 2018	ZB78-2	106		32.4808	84.2759					54.17	2.03	14.54	10.16		0.12	1.74	5.11	5.06	1.68	0.37	22.1	179	8.28	21.1	8.03						36.6	194	38.9	323	11.8		172	20.9	47.4	6.48	28.1	6.61	1.74	6.94	1.19	7.4	1.58	4.31	0.63
Hao et al., 2018	ZB78-3	106		32.4808	84.2759	0.705	2.7			48.95	2.05	14.87	10.69		0.13	2.35	6.85	5.35	1.26	0.39	22.5	177	7.95	22.7	8.73						27.5	224	39.2	320	11.9		124	19.2	45.6	6.25	27.4	6.6	1.77	6.73	1.17	7.46	1.58	4.41	0.65
Hao et al., 2018	ZB78-4	106		32.4808	84.2759	0.705	2.6			47.56	1.83	13.47	11.23		0.16	2.3	8.4	4.2	1.91	0.34	26.5	191	9.46	27.4	10.2						50.4	252	41.1	296	12.1		140	20.3	46.9	6.14	26	6.29	1.68	6.55	1.13	6.94	1.49	4.19	0.62
Hao et al., 2018	QT04-1	107.7	1.9	32.4611	84.3641	0.7071	8.7	17.19		48.67	1.63	14.81	10.88		0.22	4.48	9.96	4.75	0.11	0.1	45.4	443	24.1	45.6	42.6						2.71	51.1	33.5	109	1.95		61.8	3.1	9.44	1.7	9.39	3.43	1.41	4.27	0.85	5.61	1.24	3.49	0.51
Hao et al., 2018	QT04-2	108		32.4611	84.3641	0.7069	9	17.2		46.72	1.21	14.81	9.17		0.23	5.67	12.91	3.95	0.14	0.1	50.4	355	180	44.3	91.1						3.6	163	29.5	89.3	1.53		98.8	2.52	8.23	1.5	8.4	3.06	1.21	3.81	0.75	4.94	1.08	3	0.43
Hao et al., 2018	GZ01-1	105.6	1.2	32.5513	84.2732	0.7066	-3.3	2.56		62.38	0.87	15.88	5.83		0.1	2.08	2.87	3.66	4.36	0.15	13.2	64.2	322	11.7	36.3						153	211	33.8	336	22.9		671	62.8	124	14.6	52.7	9.7	1.45	8.33	1.23	6.87	1.38	3.69	0.55
Hao et al., 2018	GZ26-1	105.6	1.3	32.5382	84.2956	0.7062	-3.5	1.4		62.44	0.82	15.59	4.73		0.09	1.46	3.91	3.06	4.22	0.23	12	61.9	85	11.4	20.1						148	161	35.6	320	22.9		594	59.7	120	14.3	52	9.76	1.38	8.62	1.29	7.25	1.45	3.77	0.55
Hao et al., 2018	GZ26-2	106		32.5382	84.2956					61.18	0.81	15.27	5.02		0.09	1.26	4.73	2.74	4.01	0.23	11.8	59.1	115	11.6	23.5						154	192	36.4	297	23.7		672	63.3	126	14.7	54.3	10.1	1.43	8.59	1.29	7.25	1.44	3.83	0.56
Hao et al., 2018	QT03-1	106		32.4611	84.3641	0.7095	-2.9			57.41	0.65	16.62	8.02		0.17	2.94	4.63	5.65	0.22	0.09	26.9	182	43	19	20.2						4.76	123	18.2	62.3	2.84		82.4	8.64	18.6	2.36	10.1	2.57	0.82	2.81	0.51	3.31	0.74	2.06	0.32
Hao et al., 2018	QT03-2	106		32.4611	84.3641	0.7096	-2.9			60.64	0.61	15.52	7.2		0.14	2.71	4.19	4.88	0.32	0.09	28.33	195	44.9	18.6	25.9						11.3	147	23.2	92	3.55		94.9	8.78	19.6	2.51	10.9	2.83	0.89	3.2	0.58	3.79	0.84	2.4	0.37
Hao et al., 2018	ZB79-1	106		32.7368	84.4063					71.96	0.26	14.14	2.51		0.12	0.8	2.28	3.12	2.8	0.08	4.9	15.6	13.5	3.56	5.05						86.6	299	4.42	95.2	3.56		649	16.6	30.1	3.04	10.5	1.74	0.47	1.47	0.18	0.92	0.18	0.44	0.07
Hao et al., 2018	ZB79-2	106		32.7368	84.4063	0.705	1.1			71.85	0.25	14.12	2.48		0.12	0.79	2.26	3.13	2.8	0.08	5.09	14.3	9.95	4.67	5.43						96.4	343	5.42	104	3.82		737	17.6	31.1	3.17	11	1.92	0.51	1.64	0.21	1.08	0.21	0.55	0.08
Hao et al., 2018	ZB79-3	106		32.7368	84.4063	0.7049	0.9			72.42	0.25	13.92	2.35		0.11	0.79	2.1	3.04	2.58	0.06	4.94	15.3	7.44	5	4.98						92.5	327	5	103	3.72		783	17.2	29.7	3.16	10.8	1.84	0.48	1.5	0.18	0.97	0.19	0.48	0.07
Hao et al., 2018	ZB79-4	106		32.7368	84.4063					71.62	0.26	13.93	2.54		0.08	0.89	2.03	2.94	2.92	0.09	5.19	13.6	12	4.85	5.64						103	312	5.77	101	3.74		718	18.2	31.3	3.2	11.3	1.94	0.5	1.64	0.21	1.12	0.22	0.57	0.08
Harris (1988)	G141	31	1	34.77	92.86
Harrison (1997)	Mugu	17.6	0.3	29.0252	84.8264
Harrison et al., 2000	N-11	38	2	29.33	92.22
Harrison et al., 2000	N-13	44	4	29.27	92.25
Harrison et al., 2000	N-21	63	3	29.271	91.748
Harrison et al., 2000	N-25	66.6	0.5	29.31	92.08
Harrison et al., 2000	N-5	64	6	29.29	92.11
Harrison et al., 2000	N-6	68	8	29.26	92.22
Harrison et al., 2000	N-8	30.8	1	29.33	92.22
Harrison et al., 2000	N-9	48.9	0.8	29.33	92.22
Harrison et al., 2000	NM-1, NM-7, ZH-1-94	30.4	0.4	29.27	91.9
Harrison et al., 2000	NM-4	32.6	1.4	29.26	91.9
Harrison et al., 2000	NM-5	33.2	0.8	29.26	91.9
Harrison et al., 2000	YANS-5, YANS-10	42.5	1	29.3	92.16
He et al., 2007	SH5-22-02-01	51.7	2	29.93	91.35	0.709099
He et al., 2007	SH5-30-02-02	68.7	2.4	29.955	91.217	0.705475
He et al., 2007	SH71203-2	51.9	2.5	30.07	91.14
He et al., 2007	SH72803-2	52	1	29.95	91.2
He et al., 2007	SH82303-4	47.1	1.2	30	91.15
He et al., 2007	SH83003-4	62.6	2.4	29.95	91.13
He et al., 2007	SH83103-1	53.9	1.4	29.99	91.14
He et al., 2018	D0312-H1	95.4	0.94	32.9127	88.7679	0.705176	2.68			53.86	0.87	15.28	7.38		0.09	4.03	8.63	3.02	2.5	0.32	21	181.21	115.79	31.53	67.24				20.05		59.92	1626.74	21.9	153.71	10.55		1176.6	60.08	122.33	14.39	58.2	9.11	2.5	6.34	0.79	4.25	0.77	2.12	0.29
He et al., 2018	D0312-H2	94.4	0.81	32.9127	88.7679					53.47	0.92	15.7	7.8		0.06	3.28	8.53	2.94	2.52	0.34	21.94	195.8	123.2	24	66.37				19.83		56.14	1663.25	21.11	150.04	10.69		1174.1	61	123.3	14.6	57	9.2	3	6.3	1	4.18	0.74	2.08	0.29
He et al., 2018	D0312-H3	95		32.9127	88.7679	0.705179	2.4			54.43	0.87	15.09	7.45		0.09	4.02	8.75	2.92	2.48	0.32	21.01	179	119	31.2	69.23				19.19		57.98	1609.85	20.99	145.6	10.26		1195	57.2	118.1	13.99	55.1	8.86	2.44	6.03	0.74	4.09	0.73	2.02	0.29
He et al., 2018	D0312-H4	95		32.9127	88.7679					54.53	0.87	15.18	7.59		0.08	4.72	8.83	2.87	2.46	0.32	21.11	178.5	125.9	31.3	71.58				19.19		56.73	1593.37	21.12	147.3	10.3		1236	57.7	119.9	14.1	55.9	8.99	2.44	6.33	0.78	4.19	0.75	2.09	0.31
He et al., 2018	D0312-H5	95		32.9127	88.7679	0.705175	2.29			54.52	0.88	15.11	7.62		0.08	4.54	8.78	2.86	2.49	0.33	21.21	183.2	119.6	30.3	70.33				19.05		58.97	1593.97	20.84	149.2	10.4		1151	58.3	119.1	14.03	55.5	8.82	2.46	5.87	0.76	4.06	0.71	2.03	0.28
He et al., 2018	D0312-H6	95		32.9127	88.7679					54.14	0.87	15.17	7.55		0.07	4.5	8.69	2.92	2.5	0.33	20.94	181	119.4	29.8	69.41				18.91		57.37	1578.92	20.74	147.14	10.32		1260	58	119.7	14	55.6	8.96	2.37	6.04	0.74	4.13	0.74	2.02	0.29
He et al., 2018	D0312-H7	95		32.9127	88.7679	0.705149	2.4			53.18	0.89	15.25	7.78		0.06	4.82	8.33	2.96	2.5	0.33	21.17	187.7	121	31.2	70.42				19.22		58.46	1588.57	21.04	148.9	10.49		1184	59.7	124.8	14.47	55.8	9.12	2.45	6.08	0.76	4.12	0.74	2.06	0.29
He et al., 2018	D0312-H8	95		32.9127	88.7679					53.02	0.89	15.21	7.67		0.06	4.86	8.32	2.93	2.49	0.33	21.07	184.8	116.6	30.3	69.08				19.13		55.78	1593.94	21.32	146.33	10.19		1155	58.6	121	14.21	55.1	9.11	2.47	6.14	0.78	4.15	0.75	2.02	0.29
He et al., 2018	D0312-H9	95		32.9127	88.7679	0.705138	2.16			53.47	0.81	14.25	7.15		0.11	3.7	8.66	3.34	2.6	0.31	20.09	142.9	112.6	25.9	62.36				17.81		69.01	1427.18	18.9	140.12	9.78		1211	54.3	111.2	13.02	50.9	8.44	2.24	5.75	0.7	3.73	0.67	1.93	0.26
He et al., 2018	D0312-H10	95		32.9127	88.7679					54.52	0.82	14.23	7.27		0.1	3.39	7.99	3.33	2.68	0.31	19.88	153.6	109.7	23.5	61.35				17.8		67.69	1415.29	18.08	134.96	9.79		1133	51.9	109.1	12.83	50.8	8.08	2.18	5.54	0.68	3.54	0.66	1.84	0.27
He et al., 2018	D0312-H11	95		32.9127	88.7679	0.705271	2.4			50.78	0.81	14.18	7		0.13	3.49	11.13	3	2.28	0.31	20.28	167.3	111.9	28.4	66.94				17.51		59.97	1488.98	19.99	139	9.61		1062	54.2	112.6	13.19	52	8.49	2.29	5.81	0.72	3.9	0.69	1.95	0.28
He et al., 2018	D0312-H12	95		32.9127	88.7679					53.05	0.83	14.57	7.78		0.1	3.83	7.89	3.54	2.8	0.31	20.41	141	110.8	26.1	61.57				18.3		74.89	1370.51	19.14	138.49	9.8		1156	54.1	113.3	13.4	52.7	8.47	2.3	5.69	0.69	3.76	0.67	1.87	0.26
He et al., 2018	D0312-H13	95		32.9127	88.7679					50.26	0.81	14.19	7.04		0.14	2.3	10.87	3.69	2.57	0.31	19.9	157	112.8	23	57.4				16.87		68.32	1362.21	21.29	133.78	9.6		1114	55	110.7	13.37	53.8	8.71	2.37	5.83	0.76	4.13	0.74	2.04	0.28
He et al., 2018	D0312-H14	95		32.9127	88.7679					51.73	0.81	14.39	7.55		0.12	3.28	8.02	3.56	3.18	0.31	19.5	149	116.2	25.9	68.99				17.92		79.68	1156.4	17.57	136.07	9.49		1276	52.9	103.7	12.26	47.9	7.56	2.02	5.17	0.65	3.42	0.62	1.74	0.25
He et al., 2018	D0312-H15	95		32.9127	88.7679	0.705203	2.4			52.09	0.82	14.31	6.96		0.12	3.78	10.41	2.94	2.37	0.31	20.31	164.7	116.8	28.7	66.57				18.2		62.06	1522.32	19.93	137.18	9.7		1098	53.7	112	13.15	51.9	8.44	2.26	5.79	0.71	3.79	0.7	1.98	0.28
He, J., et al., 2018	PM017-08H1	38		29.95	84.4334	0.71109	-8.2			66.09	0.54	15.38	3.28		0.07	1.8	2.87	3.28	5.68	0.2	6.57	60.3	26.4	5.46	14.6	1.39	1.03	31.2	17.4		284	364	13	199	14.6	26.8	714	54.1	92.8	10.2	34.4	5.22	0.96	4.51	0.47	2.85	0.58	1.7	0.23
He, J., et al., 2018	PM017-08H2	38		29.95	84.4334	0.71116	-8.3			67.96	0.51	14.62	3.28		0.07	1.69	3	3.54	4.14	0.19	6.42	56.4	25.9	5.33	13	2.02	0.66	34.7	17.3		240	354	12.3	184	14.5	27.9	424	54.7	88.7	9.72	31.6	4.81	0.92	4.26	0.44	2.51	0.52	1.55	0.22
He, J., et al., 2018	PM017-08H3	38		29.95	84.4334	0.71131	-8.4			66.23	0.71	14.13	4.48		0.07	2.44	3.65	3.18	3.82	0.27	9.42	88.2	39.6	9.88	22.4	5	0.9	31.3	18.3		232	374	19.2	245	20.4	23.4	391	65.3	124	13.8	48.3	7.61	1.3	5.93	0.62	3.91	0.77	2.15	0.31
He, J., et al., 2018	PM017-08H4	38		29.95	84.4334	0.71129	-8.7			65.77	0.68	14.52	4.21		0.07	2.51	3.8	3.25	3.93	0.25	9.61	113	62.9	11.8	30.1	5.06	2.55	28.7	21.8		318	573	20.3	239	20.7	25	523	63.6	131	13.6	51.8	8.04	1.39	4.86	0.59	3.52	0.77	2.08	0.32
He, J., et al., 2018	PM017-09H1	38		29.95	84.4334	0.71124	-8.5			66.9	0.63	14.41	3.67		0.07	2.15	3.28	3.16	4.57	0.24	7.19	92	46.9	11.2	27	3.02	1.21	37.6	20.4		364	489	17.7	273	19.4	32.5	605	55.3	120	12.3	44.6	7.08	1.27	4.39	0.52	3.22	0.66	1.84	0.29
He, J., et al., 2018	PM017-09H2	38		29.95	84.4334	0.7113	-8.6			65.41	0.71	14.23	4.2		0.07	2.43	3.84	3.18	3.86	0.27	9.64	108	55.2	12.6	28.3	5.32	1.55	35.2	21.8		314	575	22.6	313	23.6	21.1	495	66.1	143	15.1	55	8.71	1.46	5.24	0.64	3.86	0.82	2.17	0.33
He, J., et al., 2018	PM017-09H3	38		29.95	84.4334	0.71125	-8.4			65.04	0.61	15.28	3.81		0.06	2.11	3.05	2.94	5.83	0.23	8.11	101	43.6	13.3	26.6	4.63	2.41	41.7	22.3		394	570	18.1	272	19.3	24.3	1018	54.9	113	11.9	44.9	7.05	1.32	4.19	0.5	2.98	0.68	1.8	0.27
He, J., et al., 2018	PM017-09H5	38		29.95	84.4334	0.71274	-8.5			64.76	0.63	15.4	4.09		0.07	2.07	3.61	3.29	4.75	0.24	9.07	108	30	12.4	19.8	4.52	0.9	44.8	22.6		323	485	17.8	261	18.3	24.9	689	61.2	125	12.8	44	6.47	1.29	4.17	0.49	3.05	0.69	1.85	0.29
He, J., et al., 2018	PM017-d2101	38.26	0.26	29.95	84.4334	0.71639	-7.2	-5.14		76.62	0.15	12.42	0.82		0.03	0.13	0.53	3.5	4.99	0.03	3.43	4.7	0.52	0.32	0.14	2.45	0.33	7.98	17.4		462	23.6	9.38	117	47	19.8	34.9	33.6	50.2	4.61	11.9	1.51	0.12	1.54	0.19	1.32	0.34	1.26	0.24
He, J., et al., 2018	PM017-02H1	38		29.95	84.4334	0.71191	-6.5			76.96	0.12	12.45	0.78		0.03	0.1	0.7	3.57	4.59	0.02	2.21	3.55	0.3	0.14	-0.07	0.86	0.58	9.48	15.8		370	25.4	6.4	50.4	19.8	23.9	27.5	30	37.5	3.31	8.09	0.99	0.11	1.13	0.14	0.99	0.23	0.85	0.16
He, J., et al., 2018	PM017-04H1	38		29.95	84.4334	0.7108	-7.2			74.49	0.27	12.92	1.61		0.05	0.41	1.16	3.31	4.84	0.07	3.56	18.7	1.65	1.11	1.07	1.68	3.33	15.4	16.1		339	110	13	133	24.7	23.1	233	61.1	87.9	8.68	25.7	3.48	0.5	3.33	0.38	2.57	0.52	1.73	0.28
He, J., et al., 2018	PM017-06H1	38		29.95	84.4334	0.7127	-8.5			68.58	0.38	15.44	2.13		0.04	0.79	1.55	2.94	7.17	0.11	4.57	32.4	7.7	2.45	3.76	2.01	1.08	26.9	16.2		353	277	13.5	144	14.5	30.2	918	58.6	96.5	10	32.1	4.91	0.9	4.41	0.45	2.91	0.58	1.74	0.26
He, J., et al., 2018	PM017-d2107	38.25	0.32	29.95	84.4334	0.71176	-6.9	-5.31		75.7	0.22	12.6	1.24		0.05	0.31	0.84	3.5	4.6	0.05	3.98	12.7	1.09	1.04	0.83	1.25	0.28	14.2	15.9		394	80.7	9.28	102	24.1	16.8	140	40.1	55.9	5.42	15.3	1.96	0.28	2.06	0.24	1.61	0.38	1.18	0.2
He, J., et al., 2018	PM017-10H1	38		29.95	84.4334	0.7109	-7.9			76.5	0.19	12.31	1.09		0.05	0.28	0.88	3.46	4.29	0.05	4.19	16.6	2.87	2.12	2.26	1.97	0.43	10.8	20.5		647	101	12.2	132	27.2	24.96	158	37.05	72.3	6.6	21.2	2.92	0.42	2.02	0.27	1.76	0.44	1.34	0.24
He, J., et al., 2018	PM017-06H2	38		29.95	84.4334					70.34	0.43	14.43	2.36		0.06	0.94	1.92	3.24	5.33	0.12	4.78	38.7	11.4	3.31	5.7	2.06	0.61	30.2	17.3		345	241	15.2	163.2	17.4	30.8	440	75.1	116	11	36.3	5.56	0.8	4.23	0.48	2.9	0.6	1.78	0.27
Heri et al., 2015	ChU1	52		34.3233	77.0842	0.705148	1.62425			60.68	0.728	16.52	5.86		0.099	2.4	4.85	4.13	1.96	0.21
Heri et al., 2015	ChV1	52		34.3239	77.0821	0.705434	0.977285			62.57	0.654	15.98	5.38		0.199	2.57	4.69	3.78	2.39	0.2
Heri et al., 2015	LiN1	52		34.287	77.1653	0.705176	4.23561			68.85	0.376	15.27	3.04		0.035	0.52	1.91	4.13	3.97	0.13
Heri et al., 2015	LiO1	54.6	0.1	34.3	77.1406
Heri et al., 2015	Ta011	52		34.1664	77.4433	0.706766	-1.29269			55.03	1.113	16.81	6.93		0.103	2.44	5.08	4.29	2.86	0.73
Heri et al., 2015	Ta021	52		34.1664	77.4433	0.705178	2.67782			55.69	1.284	16.68	6.89		0.091	2.63	4.75	4.76	1.94	0.82
Heri et al., 2015	Ta031	52		34.1714	77.4469	0.70645	0.0241205			49.66	1.6	16.33	8.88		0.14	5.21	8	3.85	3.1	0.58
Heri et al., 2015	Ta032	52		34.1721	77.4475	0.706623	-0.766595			48.88	1.771	15.23	9.43		0.166	6.62	9.68	3.32	2.65	0.59
Heri et al., 2015	Ta033	52		34.1735	77.4524	0.70632	0.749158			49.98	1.665	16.22	9.02		0.158	6	8.6	3.68	2.94	0.54
Heri et al., 2015	Ta041	52		34.1742	77.4501	0.705207	1.20809			61.95	0.883	16.36	5.62		0.074	1.78	4.19	4.44	2.98	0.54
Heri et al., 2015	Ta042	52		34.1741	77.4502	0.705986	-1.26867			57.99	0.983	16.41	6.17		0.096	2.35	5.11	3.97	2.77	0.59
Heri et al., 2015	Ta051	52		34.1754	77.4474	0.711987	-4.32905			66.76	0.468	15.08	3.05		0.047	1.13	3.01	4.03	3.6	0.21
Heri et al., 2015	Ta071	52		34.1723	77.4284	0.705995	-0.639457			61.27	0.94	16.61	5.22		0.075	2.14	4.34	4.34	2.75	0.52
Heri et al., 2015	Ta4a1	52		34.1742	77.4516	0.705913	-0.649546			58.87	0.993	16.6	6.03		0.093	2.51	5.25	4	2.64	0.58
Heri et al., 2015	Ta5a1	43.36	0.77	34.175	77.448	0.714593	-8.93995			60.19	0.872	15.15	4.73		0.086	3.03	4.91	3.33	5.45	0.59
Heri et al., 2015	TaX	52		34.1668	77.4457	0.705679	0.0972777			57.24	1.164	16.14	6.13		0.11	2.07	4.63	4.23	4.22	0.68
Heri et al., 2015	TuM1	54.34	0.18	34.2484	77.2708	0.704529	2.96965			60.5	0.822	16.65	6.05		0.114	2.73	5.68	3.79	1.97	0.35
Heri et al., 2015	UmH1	52		34.2155	77.3913	0.70727	-5.81403			58.56	1.706	15.25	5.84		0.075	2.71	4.5	3.71	5.28	0.98
Heri et al., 2015	UmI1	52		34.2152	77.3915	0.709483	2.10907			58.17	1.03	16.72	6.19		0.101	2.57	5	4.18	2.47	0.65
Heri et al., 2015	UmJ1	52		34.2064	77.3694	0.707292	-6.02415			56.55	1.923	14.82	6.41		0.082	2.85	4.09	3.39	5.75	1.07
Heri et al., 2015	YaQ1	52		34.3064	77.1351	0.704914	3.21351			60.06	0.905	16.67	6.19		0.067	2.48	5.03	4.25	2.13	0.36
Heri et al., 2015	YaR1	52		34.3079	77.1348	0.705063	2.89257			62.92	0.748	16.14	5.38		0.06	2.17	2.73	4.08	3.01	0.32
Hetzel et al., 2011	DC-31	117.5	3.9	31.4677	89.9208
Hetzel et al., 2011	DC-33	111.6	0.5	31.3733	90.0143
Hetzel et al., 2011	H-23	117	2.8	31.4227	89.8048
Hetzel et al., 2011	H-29	111.7	1.6	31.4433	89.8982
Hetzel et al., 2011	H-30	112.8	2.3	31.4685	89.8959
Heuberger et al., 2007	01A07	34.4	2.5	35.4753	71.7975			8.92
Heuberger et al., 2007	01A50b	107	0.18	35.6703	71.9136			8.85
Heuberger et al., 2007	01A62	105.2	0.29	35.7138	71.9157			3.13333
Heuberger et al., 2007	01B04	103.79	0.27	36.0726	72.2898			1.22
Heuberger et al., 2007	01B22	47.4	0.5	35.4858	71.7914			-1.57143
Heuberger et al., 2007	01B24	44.18	0.09	35.4069	71.7669			11.625
Heuberger et al., 2007	01B25	111.52	0.4	35.465	71.735			14.1667
Heuberger et al., 2007	sh2500	106.95	0.97	35.7169	71.9569			7.96667
Heuberger et al., 2007	sill_20.1	106.64	0.35	35.7728	72.0222			10.2
Heuberger et al., 2007	ZP22	121	1	36.1958	71.8075
Hildebrand et al., 1998	PH054f	24.2	0.19	36.0937	71.3316
Hildebrand et al., 1998	PH104	24	0.5	35.995	71.4986
Hildebrand et al., 2001	PH054i	195	10	36.0937	71.3316
Hildebrand et al., 2001	PH130a	114	2	36.0058	71.6506
Horton and Leech, 2013	KF-19	15	3	34.6331	77.6364
Horton and Leech, 2013	PT-10	17.4	0.25	34.0608	78.2313
Horton and Leech, 2013	PT-22_A	20	3	34.0371	78.2116
Horton and Leech, 2013	PT-22_B	55	10	34.0371	78.2116
Horton and Leech, 2013	PT-25_A	18.5	5	34.0258	78.1764
Horton and Leech, 2013	PT-25_B	85.7	1.4	34.0258	78.1764
Horton and Leech, 2013	PT-30	157	3	34.1529	78.1857
Horton and Leech, 2013	Z-1	21.5	1	33.4433	76.7765
Horton and Leech, 2013	Z-40	27.3	1.2	34.0503	76.2448
Horton and Leech, 2013	Z-45_A	17.2	0.9	34.0616	75.9344
Horton and Leech, 2013	Z-5	20.3	1.7	33.4512	76.7685
Hou et al., 2004	CZK051-26	15.6	0.3	29.587	89.991
Hou et al., 2004	CZK051-470	14.5	0.4	29.587	89.991
Hou et al., 2004	Dzl-01	13	0.5	29.58	91.32	0.7052	0.644
Hou et al., 2004	Dzl-05	13	0.5	29.58	91.32	0.705	1.814
Hou et al., 2004	Dzl-06	13	0.5	29.58	91.32	0.705	0.839
Hou et al., 2004	Dzl-07	13	0.5	29.58	91.32	0.7047	2.01
Hou et al., 2004	Jm-16	15	2	29.8	91.8	0.7069	-1.502
Hou et al., 2004	Jm-23	15	2	29.8	91.8	0.7062	-1.307
Hou et al., 2004	Jmy-01	15	2	29.8	91.8	0.7068	-2.282
Hou et al., 2004	Jmy-04	15	2	29.8	91.8	0.7065	-6.183
Hou et al., 2004	Jmy-07	15	2	29.8	91.8	0.7064	-2.088
Hou et al., 2004	Ng-16	16	2	29.461	90.815	0.705	-3.25
Hou et al., 2004	Ng-18	16	2	29.461	90.815	0.7048	1.424
Hou et al., 2004	Nmy-04	16	2	29.461	90.815	0.7051	2.204
Hou et al., 2004	Nmy-07	16	2	29.461	90.815	0.7048	5.52
Hou et al., 2004	PI-18	16	2	29.461	90.815	0.7049	1.619
Hou et al., 2004	PI-28	16	2	29.461	90.815	0.7051	0.488
Hou et al., 2004	QZK001	17.7	0.4	29.602	91.566
Hou et al., 2012	0317-01	45		28.6136	92.2448	0.717594	-12.3358
Hou et al., 2012	0317-02	45		28.6136	92.2448	0.71792	-9.15396
Hou et al., 2012	0317-03	45		28.6136	92.2448	0.717797	-12.2053
Hou et al., 2012	0317-04	45		28.6136	92.2448	0.717834	-12.3623
Hou et al., 2012	0317-05	45		28.6136	92.2448	0.717738	-12.2712
Hou et al., 2012	0317-06	45		28.6136	92.2448	0.717806	-12.1473
Hou et al., 2012	0319-06	35		28.9004	91.8519	0.71549	-11.4606
Hou et al., 2012	0321-07	35		28.9004	91.8519	0.719344	-9.95329
Hou et al., 2012	0321-08									48.35	3.58	14.27	12.02		0.3	4.43	7.93	2.43	0.17	0.54	50.5	420	40.3	42.1	18.7						2.55	252	63.9	308	13.3		40.4	29.5	64.4	8.63	34.9	9.66	3.11	11.3	1.93	12	2.31	6.72	0.98
Hou et al., 2012	0321-09									48.51	3.72	14.36	12.03		0.25	4.31	7.87	2.54	0.17	0.54	48.3	436	36.5	40	15.2						3.02	268	57.8	305	15		37.2	27.5	59.8	7.68	33	9.27	2.96	10.9	1.83	11.3	2.28	6.52	0.96
Hou et al., 2012	0322-01	35		28.9004	91.8519	0.715559	-10.4165
Hou et al., 2012	0322-04	35		28.9004	91.8519	0.715043	-10.423
Hou et al., 2012	0323-01	35		28.9004	91.8519	0.713334	-9.10395
Hou et al., 2012	0323-02	35		28.9004	91.8519	0.716044	-13.6597
Hou et al., 2012	0323-03	35		28.9004	91.8519	0.714361	-8.94171
Hou et al., 2012	0323-04	35		28.9004	91.8519	0.714293	-9.27735
Hou et al., 2012	0389-6	46		28.5198	92.2364	0.715054	-10.0333
Hou et al., 2012	0389-7	46		28.5198	92.2364	0.716048	-11.0628
Hou et al., 2012	0389-8	46		28.5198	92.2364	0.715827	-10.895
Hou et al., 2012	0389-9	46		28.5198	92.2364	0.715569	-10.9918
Hou et al., 2012	0389-10	46		28.5198	92.2364	0.715931	-11.0367
Hou et al., 2012	0389-11	46		28.5198	92.2364	0.716168	-10.9951
Hou et al., 2012	0389-12	46		28.5198	92.2364	0.71625	-11.1583
Hou et al., 2012	0321-031	35		28.9004	91.8519	0.717506	-11.6028
Hou et al., 2012	0321-041	35		28.9004	91.8519	0.718559	-10.4401
Hou et al., 2012	0389-17					0.733351	-15.6
Hou et al., 2012	cb-154	45		28.6136	92.2448					70.18	0.21	16.05	1.29		0.02	0.76	2.16	4.08	3.38	0.1	3.42727	17.8	6.56	2.02	3.32						162	340	6.21	102	5.13		457	20.6	43.4	4.7	17.5	3.63	0.91	2.47	0.29	1.19	0.2	0.56	0.07
Hou et al., 2012	cb-167	45		28.6136	92.2448	0.717831	-12.6109			69.74	0.24	16.71	1.53		0.03	0.89	2.8	4.46	3.22	0.12	4.18182	22.7	8.16	2.52	3.64						146	380	5.77	117	4.65		527	28.9	59.3	6.43	23.4	4.63	1.15	2.97	0.32	1.24	0.2	0.53	0.07
Hou et al., 2012	cb-168	45		28.6136	92.2448					70.8	0.26	16.07	1.62		0.03	0.86	2.69	4.08	3.14	0.11	4.04545	24.2	9.3	2.75	3.84						150	365.455	6.44	116	4.77		461	26.1	54.6	5.86	21.8	4.22	1.07	2.93	0.33	1.3	0.23	0.64	0.08
Hou et al., 2012	cb-172	45		28.6136	92.2448	0.717871	-12.4412			69.13	0.25	16.74	1.56		0.02	0.84	2.78	4.23	3.27	0.11	3.70909	21.8	8.03	2.43	3.5						142	390.909	6.03	115	4.34		564	28.6	58.9	6.39	23.4	4.67	1.18	3.14	0.35	1.33	0.21	0.57	0.06
Hou et al., 2012	cb-178	45		28.6136	92.2448					70.75	0.26	16.12	1.59		0.03	0.92	2.74	3.8	3.03	0.11	3.75909	22.85	9.145	2.58	3.765						147.5	363.182	6.215	112.5	4.8		407.5	25.95	54.1	5.895	21.65	4.36	1.09	2.85	0.32	1.315	0.21	0.575	0.07
Hou et al., 2012	cb-189	45		28.6136	92.2448	0.717564	-12.4957			70.72	0.25	16.21	1.6		0.03	0.82	2.76	4.1	3.2	0.1	4.17273	21	7.26	2.43	3.05						146	399.091	6.64	114	5.02		600	27	56.3	6.07	22.3	4.55	1.1	3.08	0.33	1.35	0.22	0.59	0.08
Hou et al., 2012	cb-193	45		28.6136	92.2448	0.718147	-12.5609			70.63	0.25	15.84	1.58		0.03	0.82	2.82	3.97	3.16	0.12	3.90909	21.3	6.19	2.33	3.09						156	363.636	6.11	110	3.73		464	24.5	51.4	5.53	20.7	4.03	1.06	2.83	0.32	1.29	0.21	0.56	0.07
Hou et al., 2012	cb-206			28.5198	92.2364					69.12	0.32	16.1	0.43		0.04	1.41	2.15	3.92	4.01	0.12	5.43	33	34.2	4.99	19.1						220	353	8.03	121	10.1		451	28	55.7	6	21.5	4.26	1.16	3.26	0.37	1.67	0.29	0.79	0.11
Hou et al., 2012	cb-207			28.5198	92.2364	0.716451	-11.8277			67.45	0.46	16.82	0.68		0.04	2.08	0.77	3.53	2.67	0.12	9.95	63.5	55.3	4.21	24.5						220	233	13	133	7.85		340	33.2	65.3	7.2	26.3	5.08	1.2	4.19	0.52	2.64	0.47	1.34	0.18
Hou et al., 2012	cb-208			28.5198	92.2364	0.71591	-11.6282			68.08	0.38	15.75	1.36		0.04	1.58	2.06	3.59	4.7	0.12	6.51	40.2	43.5	6.23	24.8						258	296	10.2	135	9.33		444	32.6	66.9	7.18	26.2	5.32	1.06	4.06	0.46	2.15	0.38	1.03	0.14
Hou et al., 2012	cb-209			28.5198	92.2364	0.715761	-11.3098			68.29	0.35	16.26	1.09		0.02	1.4	2.31	3.87	4.41	0.11	6.14	35.7	37.4	5.87	22						195	338	9.13	133	8.58		468	29.7	60.1	6.4	23.8	4.79	1.17	3.55	0.41	1.91	0.33	0.87	0.11
Hou et al., 2012	cb-210			28.5198	92.2364	0.715379	-11.2859			66.96	0.43	16.22	2.02		0.04	1.85	2.65	3.98	3.38	0.14	8.2	52.2	49.8	7.99	28						225	363	11.7	139	9.18		492	32.3	65.2	6.93	25.1	5.02	1.25	3.8	0.46	2.28	0.43	1.18	0.16
Hou et al., 2012	cb-211			28.5198	92.2364	0.713098	-10.559			65.14	0.45	17.44	1.85		0.06	1.8	3.46	4.12	2.99	0.16	8.23	42.5	24.9	6.8	7.5						151	403	10.4	142	11		507	31.1	61.5	6.7	24.3	4.69	1.23	3.59	0.41	2.03	0.39	1.08	0.14
Hou et al., 2012	cb-212-1			28.5198	92.2364	0.715766	-9.02457
Hou et al., 2012	cb-213-2			28.5198	92.2364					69.62	0.32	15.47	1.21		0.03	1.21	2.08	3.84	4.04	0.11	5.32	30.2	30.9	3.55	17.9						196	296	8.55	116	8.11		412	31.2	63.3	6.71	24.4	4.78	1.05	3.58	0.4	1.88	0.31	0.87	0.12
Hou et al., 2012	cb-31	30		29.2915	91.7859					70.44	0.28	14.4	1.86		0.02	0.79	1.53	3.62	5.52	0.12	4.18	28	13.3	3.5	8.07						214	473	11.3	173.333	26.4		761	68.9	126	11.4	35.7	4.94	0.9	3.43	0.41	2.03	0.37	1.12	0.15
Hou et al., 2012	cb-33	30		29.2915	91.7859					71.72	0.28	14.67	1.72		0.02	0.84	1.43	3.1	5.81	0.12	4.02	31.8	10.2	3.97	7.95						224	473	9.18	146.667	26.5		782	69.3	124	11.1	33.7	4.43	0.83	3.07	0.35	1.71	0.31	0.94	0.13
Hou et al., 2012	cb-34	29.82	0.27	29.2915	91.7859	0.70638	-3.2451			76.44	0.11	12.57	0.12		0.01	0.11	0.53	2.99	6.29	0.04	1.47	3.07	1.29	0.38	1.09						245	155	3.49	74.3333	32.6		102	19.9	35.9	3.29	9.53	1.12	0.27	0.74	0.09	0.48	0.1	0.34	0.06
Hou et al., 2012	cb-35	30		29.2915	91.7859					76.61	0.09	12.79	0.08		0.01	0.19	0.46	2.86	6.99	0.03	1.585	3.69	1.685	0.24	1.275						247	174	3.76	78.2917	29.55		113	31.55	52.6	4.365	11.8	1.355	0.26	0.965	0.105	0.53	0.11	0.38	0.06
Hou et al., 2012	cb-36	30		29.2915	91.7859	0.706243	-3.39616			76.31	0.11	12.69	0.08		0.01	0.04	0.65	2.52	6.88	0.03	1.64	3.79	1.13	0.27	1.28						246	163	3.56	77.25	33.8		129	20.2	35.8	3.25	9.29	1.15	0.26	0.83	0.09	0.53	0.1	0.36	0.06
Hou et al., 2012	cb-37	30		29.2915	91.7859					65.26	0.48	16.66	3.78		0.07	1.53	5.33	4.51	0.96	0.26	6.17	64.8	4.81	9.61	7.19						50.8	1242	9.23	105	5.33		408	30	62.2	6.98	26.2	4.12	1.03	3.07	0.36	1.71	0.32	0.9	0.11
Hou et al., 2012	cb-38	30		29.2915	91.7859	0.706642	-3.25036			79.08	0.1	10.96	0.09		0.01	0.22	0.52	1.98	6.47	0.03	1.37	3.42	0.66	0.3	1.1						221	153	3.41	62.5	31.7		124	21.6	36.1	3.13	8.8	0.98	0.24	0.76	0.09	0.46	0.1	0.34	0.06
Hou et al., 2012	cb-77	46		28.5198	92.2364	0.715807	-11.4466			68.65	0.36	15.85	2.09		0.03	1.4	2.29	3.73	3.84	0.12	5.02727	34.5	34.2	4.85	19.8						190	331.818	7.43	125	7.05		468	29.2	60.8	6.43	23.3	4.62	1.2	3.21	0.37	1.54	0.26	0.75	0.09
Hou et al., 2012	cb-77-1	46.28	0.5	28.5198	92.2364					69.25	0.34	16.18	2.17		0.03	1.41	2.1	3.92	3.7	0.12	5.23636	34.6	52.4	5.67	24.1						185	314.545	7.9	130	7		449	24.2	49.6	5.35	19.2	3.89	1.2	2.89	0.36	1.57	0.27	0.8	0.09
Hou et al., 2012	cb-77-2	45.43	0.41	28.5198	92.2364					68.66	0.33	15.61	1.92		0.03	1.31	2.48	3.65	3.83	0.11	4.97273	32.7	35.2	5.09	20.3						182	346.364	7.33	123	7.2		427	25.7	52.9	5.61	20.3	4.01	1.16	2.68	0.35	1.5	0.26	0.72	0.09
Hou et al., 2012	cb-77-3	46	3	28.5198	92.2364					69.25	0.33	15.7	2.03		0.03	1.55	2.28	3.94	3.85	0.11	5.28636	35.1	37.3	5.3	20.6						192	313.182	8.185	121.5	8.32		454.5	26.2	54.15	5.775	20.9	4.21	1.1	2.975	0.37	1.565	0.28	0.775	0.095
Hou et al., 2012	cb-78	46		28.5198	92.2364	0.71585	-11.5595			68.9	0.32	15.92	2.05		0.03	1.4	2.01	3.93	3.9	0.12	4.84545	31.2	36.1	4.77	20						201	324.545	7.53	115	7.06		463	24.1	50.3	5.38	19.4	3.93	1.1	2.83	0.35	1.48	0.27	0.71	0.1
Hou et al., 2012	cb-79	46		28.5198	92.2364	0.716079	-11.4692			68.31	0.32	15.94	2.06		0.03	1.39	2.36	4.43	3.69	0.11	4.86364	32.9	37.1	4.95	19.6						192	317.273	8.33	125	6.3		448	27.4	57.3	5.96	21.7	4.44	1.22	3.22	0.39	1.75	0.3	0.83	0.11
Hou et al., 2012	CMD-1	30		29.2915	91.7859					65.98	0.49	15.28	3.63		0.05	1.77	3.37	4.22	3.79	0.26	5.96364	66.7	26.3	9.49	17.1						134	776.364	10.7	115	12.2		1009	50.3	98.3	10.2	34.8	5.17	1.25	3.51	0.45	1.99	0.37	1.03	0.14
Hou et al., 2012	CMD-10	30		29.2915	91.7859	0.706166	-3.19117			66.52	0.46	15.52	3.52		0.06	1.69	3.33	3.91	3.88	0.23	5.85455	68	25.2	9.35	17						144	755.455	10.4	118	12.1		837	50.2	94.4	9.65	32.5	4.98	1.2	3.23	0.42	1.82	0.34	0.96	0.13
Hou et al., 2012	CMD-16-1	30		29.2915	91.7859					69.3	0.42	15.64	2.27		0.02	1.25	2.71	3.83	3.4	0.12	6.62727	46.6	15	8.75	20.6						127	678.182	12.8	138	9.14		874	33	55.7	5.34	17.3	3.07	1.01	2.71	0.42	2.3	0.45	1.22	0.17
Hou et al., 2012	CMD-17	30		29.2915	91.7859	0.706287	-3.35629			63.97	0.44	17.7	2.84		0.03	1.52	3.55	4.57	3.33	0.21	5.03636	54.7	22.4	9.14	16.1						129	860	6.81	58.1	8.76		769	24.7	42.5	4.29	14.7	2.31	1.07	1.81	0.24	1.21	0.24	0.73	0.1
Hou et al., 2012	CMD-18	30		29.2915	91.7859					67.62	0.43	16.44	2.48		0.03	1.39	3.43	4.48	2.65	0.17	4.11818	49.4	18.4	8.82	14.9						109	831.818	7.64	82.5	10.2		648	34.6	59.9	5.88	19.1	2.71	1	1.76	0.26	1.21	0.23	0.75	0.11
Hou et al., 2012	CMD-19	30		29.2915	91.7859					70.1	0.4	15.21	2.73		0.03	1.43	2.89	3.83	2.91	0.17	5.94545	53.8	19.9	9.46	20.4						111	660.909	10.9	98.1	9.24		626	57.8	100	9.67	30.9	4.36	0.99	2.92	0.39	1.8	0.36	1.1	0.15
Hou et al., 2012	CMD-20	30		29.2915	91.7859	0.706082	-2.50162			66.27	0.46	17.14	2.97		0.03	1.53	3.5	4.2	3.13	0.2	5.61818	56.4	22.9	9.66	16.7						121	851.818	6.66	62.5	8.98		753	24.1	40.8	4.15	14.3	2.27	1.02	1.71	0.23	1.15	0.23	0.67	0.1
Hou et al., 2012	CMD-21	30		29.2915	91.7859					69.47	0.39	14.99	3.03		0.03	1.06	2.58	3.99	3.15	0.11	5.79091	58.9	52.6	8.82	22.5						111	587.273	8.27	114	8.73		660	55.5	94.5	8.61	26.7	3.71	0.94	2.46	0.34	1.53	0.29	0.83	0.11
Hou et al., 2012	CMD-30	30		29.2915	91.7859					65.22	0.47	16	3.66		0.06	1.93	3.79	4.83	3.58	0.27	6.50909	72.7	27.9	10.2	18.8						133	840.909	10.6	130	11.5		915	51.4	98.7	10.1	34.3	5.31	1.26	3.46	0.45	1.94	0.36	0.98	0.14
Hou et al., 2012	CMD-31	30		29.2915	91.7859					65.3	0.48	16.32	3.61		0.06	1.96	3.81	4.72	3.49	0.26	6.42727	73.2	27.7	10.4	19.5						126	886.364	10.7	133	11.7		949	52.5	101	10.4	35.5	5.47	1.33	3.6	0.45	2.01	0.35	1.03	0.14
Hou et al., 2012	CMD-32	30		29.2915	91.7859	0.706182	-3.05303			65.98	0.51	15.78	3.77		0.06	1.81	3.64	4.2	3.81	0.26	6.18182	71.2	25.2	9.66	17.5						130	802.727	11.2	147	12.7		1005	53.3	106	11.1	37.3	5.69	1.38	3.83	0.48	2.04	0.38	1.08	0.14
Hou et al., 2012	CMD-33	30		29.2915	91.7859	0.706223	-3.22235			65.93	0.48	16.11	3.55		0.06	1.82	3.44	4.13	4.02	0.26	5.86364	66.4	23.6	9.26	17.2						134	810.909	9.71	146	10.8		999	48.9	93	9.58	32.5	4.87	1.22	3.32	0.41	1.85	0.34	0.94	0.12
Hou et al., 2012	CMD-36	30		29.2915	91.7859					69.63	0.46	14.85	3.03		0.04	1.48	2.42	3.6	3.53	0.2	4.25909	54.9	26.2	9.185	19.3						130	587.727	6.205	109	8.84		713.5	51.9	78	6.855	21.15	2.885	0.845	2.005	0.25	1.14	0.2	0.59	0.08
Hou et al., 2012	CMD-37	30		29.2915	91.7859					72.54	0.32	14.09	2.18		0.02	0.97	1.7	3.19	4.91	0.12	2.94545	39.6	20.5	6.34	13.5						156	462.727	3.86	96.8	5.81		670	49.4	71.9	6.01	18	2.19	0.67	1.47	0.18	0.68	0.13	0.36
Hou et al., 2012	T0319-10	35		28.9004	91.8519					73.51	0.26	14.23	1.53		0.02	0.67	1.84	3.27	3	0.12	3.49	24.8									161	323	6.66	121	4.61		412	33	66	7.54	28	5.46	0.94	3.27	0.3	1.67	0.27	0.77	0.09
Hou et al., 2012	T0319-11	35		28.9004	91.8519					72.92	0.25	14.84	1.43		0.02	0.81	2.02	3.73	2.93	0.1	3.57	25.9									163	318	6.85	112	4.25		417	28.5	57.6	6.51	24.1	4.83	0.91	2.97	0.3	1.7	0.29	0.8	0.11
Hou et al., 2012	T0319-12	35		28.9004	91.8519					72.54	0.27	14.43	1.72		0.03	0.91	2.21	3.31	3.16	0.11	3.88	28.7									167	315	6.43	124	4.79		411	30.9	62.8	7.09	26.5	5.33	0.92	3.41	0.29	1.61	0.26	0.69	0.09
Hou et al., 2012	T0319-6	35		28.9004	91.8519	0.71537	-11.3866			71.8	0.24	15.35	1.17		0.02	0.73	1.91	4.41	3.52	0.11	2.34	14.2									195	349	3.74	120	4.12		397	22.3	43.3	4.62	17	3.55	1.07	2.54	0.26	0.96	0.13	0.38	0.05
Hou et al., 2012	T0319-7	35		28.9004	91.8519	0.715909	-13.3016			74.84	0.25	13.47	1.63		0.03	0.79	1.94	3.02	2.95	0.12	3.37	25.5									244	310	6.86	119	4.57		357	29.6	60.1	6.83	25.1	5.16	0.86	3.16	0.29	1.61	0.27	0.73	0.1
Hou et al., 2012	T0319-8	35		28.9004	91.8519	0.718847	-9.76792			71.57	0.3	15.18	1.8		0.03	0.99	2.08	3.36	3.38	0.11	4.53	37.3									155	313	6.77	126	5.58		483	39.7	80.5	9.37	35.1	6.98	1.1	4.37	0.4	2.27	0.37	0.98	0.13
Hou et al., 2012	T0319-9	35		28.9004	91.8519					72.16	0.26	14.7	1.57		0.03	0.79	2.34	3.4	3.37	0.11	3.49	26.3									152	338	6.16	124	4.61		503	33.3	67.2	7.62	28.3	5.48	0.99	3.26	0.28	1.54	0.24	0.67	0.08
Hou et al., 2012	T0320-6	35		28.9004	91.8519	0.711942	-14.9374			72.46	0.03	16.2	0.4		0.01	0.04	4.17	4.8	0.82	0.03	1.4	6.4									30	1564	6.24	41.5	1.16		112	7.17	12.7	1.39	4.64	1.26	0.74	1.38	0.21	1.04	0.18	0.5	0.07
Hou et al., 2012	T0321-08	35		28.9004	91.8519	0.71207	-4.5
Hou et al., 2012	T0321-09	35		28.9004	91.8519	0.712652	-4.3
Hou et al., 2012	YX-10	46		28.8045	91.9688	0.717478	-12.8536			68.3	0.33	16.58	2.16		0.04	1.14	2.73	3.94	3.29	0.13	4.52727	33	20.05	3.99	7.335						159	295.909	8.19	131.5	5.675		451.5	31.35	64.45	7.125	26	5.045	1.325	3.49	0.42	1.73	0.285	0.75	0.095
Hou et al., 2012	YX-11	46		28.8045	91.9688	0.717526	-12.9626			68.57	0.33	16.76	2.11		0.04	1.24	2.85	3.92	3.2	0.12	4.56364	33.4	18.7	3.91	7.29						152	330.909	8.24	136	5.1		494	34.1	69.5	7.59	28	5.37	1.42	3.68	0.43	1.77	0.28	0.77	0.1
Hou et al., 2012	YX-12	46		28.8045	91.9688					68.31	0.31	16.27	2.07		0.04	1.02	2.59	3.87	3.22	0.14	4.50909	29.8	16.9	3.56	6.56						167	301.818	7.44	120	5.27		450	28.4	59.4	6.29	23.4	4.62	1.27	3.35	0.38	1.62	0.27	0.74	0.09
Hou et al., 2012	YX-13	46		28.8045	91.9688					68.94	0.32	16.32	1.98		0.03	1.13	2.5	4.25	3.27	0.13	4.72727	34	22.3	3.95	7.18						161	290	8.25	125	5.3		421	32.5	67.3	7.24	26.4	5.1	1.3	3.67	0.43	1.76	0.29	0.76	0.09
Hou et al., 2012	YX-14	46		28.8045	91.9688					68.48	0.33	15.9	2.05		0.03	1.47	2.36	4.69	3.37	0.14	4.61818	32.8	18.2	3.82	7.08						164	282.727	8.47	120	5.54		434	32.3	67.2	7.24	26.5	5.07	1.21	3.63	0.43	1.78	0.28	0.8	0.1
Hou et al., 2012	YX-9	46.49	0.71	28.3943	92.5448
Hou et al., 2015	3911-90	182.3		29.59	91.6	0.709281	-2.13			76.5	0.19	12.3	1.05		0.07	0.24	0.58	2.8	5.77	0.04	3.9	17.6	8.87	1.81	5.57						116	125	12.6	114	7.1		2325	29.6	51.3	5.03	16.3	2.7	0.4	3.47	0.38	2.36	0.49	1.41	0.25
Hou et al., 2015	3911-93	182.3		29.59	91.6	0.708763	-2.14
Hou et al., 2015	QL01-58	182.3		29.59	91.6					81.4	0.19	10	0.82		0.04	0.13	0.09	1.29	6.28	0.03	2.76	13.3	11.4	1.34	6.71						111	198	6.39	90.9	6.92		2060	14.3	26.2	3.01	9.86	1.69	0.05	1.95	0.2	1.33	0.27	0.81	0.14
Hou et al., 2015	1513-58	182.3		29.59	91.6	0.706359	-1.11			79.9	0.17	11.4	1.09		0.03	0.15	0.41	3.73	3.33	0.04	2.35	14.4	5.11	1.83	3.61						62.9	155	6.99	89.1	4.41		1043	13.6	25.1	2.58	8.73	1.55	0.15	1.76	0.21	1.36	0.28	0.82	0.15
Hou et al., 2015	601-89	182.3		29.59	91.6	0.708108	-1.83			77.1	0.62	12.4	1.49		0.08	0.24	0.49	3.73	4.17	0.04	3.18	16.5	8.48	1.78	5.8						84.3	132	9.48	105	6.06		1676	15.7	31.6	3.03	9.9	1.79	0.05	2.1	0.27	1.78	0.38	1.05	0.2
Hou et al., 2015	YB12-1-1	172		29.6733	88.3817					65.96	0.49	15.81	4.34	1.44	0.1	1.28	2.78	4.28	2.79	0.11	10.48	76.5	21.95	6.8	4.59	11.02					77.58	361.08	20.75	183.29	6.56		800.95	22.84	43.18	4.75	17.14	4.22	1.14	3.37	0.53	3.5	0.72	2.24	0.36
Hou et al., 2015	YB12-4-1	171.9	1	29.6733	88.3817			6.172		70.42	0.39	14.95	3.14	1.33	0.07	0.78	1.83	3.59	2.62	0.09	6.49	44.09	10.52	3.01	0.75	2.6					91.01	315.96	19.69	184.33	6.93		878.49	21.38	39.73	4.56	16.5	3.62	1.11	3.18	0.53	3.29	0.7	2.16	0.37
Hou et al., 2015	YB12-4-3	172		29.6733	88.3817					70.85	0.4	14.64	3.12	1.14	0.08	0.67	1.79	3.68	2.74	0.09	6.47	44.29	14.34	3.21	0.67	3.76					77.61	280.83	18.36	99.21	6.86		820.06	20.34	37.78	4.27	15.08	3.41	1.06	3.06	0.51	3.15	0.66	2.01	0.34
Hou et al., 2015	YB12-4-7	172		29.6733	88.3817					69.44	0.4	14.72	3.19	1.43	0.12	1.13	2.27	3.58	2.99	0.09	6.95	43.97	11.86	3.69	1.76	5.7					90.53	257.49	19.67	125.42	6.77		852.07	23.94	44.24	4.8	17.04	4.01	1.07	3.22	0.5	3.03	0.69	2.12	0.34
Hou et al., 2015	YB12-4-8	172		29.6733	88.3817					67.65	0.39	14.61	3.24	1.31	0.08	0.79	2.37	3.84	3.06	0.09	6.9	62	41.54	3.59	1.25	7.48					84.18	353.92	20.53	162.99	7.16		847.14	21.84	40.06	4.59	16.26	3.74	1.16	3.32	0.55	3.4	0.72	2.19	0.37
Hou et al., 2015	0403-174	15.5		29.633	89.9667					70.55	0.35	15.26	1.07	0.66	0.02	1.15	1.99	4.2	3.59	0.1	4.89	45.8	98.7	2.24	42.2	211					118	513	4	78.4	3.95		621	21	38.9	4.43	15.9	2.59	0.58	1.68	0.21	0.94	0.15	0.41	0.06
Hou et al., 2015	11YR11	15.5	1	31.2867	82.1067			-5.18		63.31	0.62	14.84	3.71		0.05	1.72	3.08	3.85	8.07	0.24	7.22	70.31	24.56	9.75	11.14						135.15	724.35	13.14	44.04	7.94		1062.54	38.24	74.55	8.78	32.21	5.55	1.37	3.86	0.54	2.59	0.46	1.18	0.17
Hou et al., 2015	11YR15	16.2		31.2867	82.1067					65.74	0.6	15.64	3.34		0.06	1.59	2.63	4.16	4.03	0.24	5.77	64.09	21.04	7.66	9.49						137.08	807.82	10.88	48.86	7.8		1255.01	51.98	93.95	10.41	36.37	5.68	1.38	3.78	0.49	2.22	0.43	1.11	0.15
Hou et al., 2015	QL02-04-2	16.8		29.59	91.6	0.704847	0.66
Hou et al., 2015	QL02-16	16.8		29.59	91.6	0.704853	0.38
Hou et al., 2015	ZK5015-3	173		29.3667	88.433			15.39
Hou et al., 2015	7224-159	175.7		29.3667	88.433			14.48
Hou et al., 2015	ZK6152-1	176		29.3667	88.433			14.86
Hou et al., 2015	X6164-8	176		29.3667	88.433			14.86
Hou et al., 2015	7226-233.7	181.8		29.3667	88.433			14.29
Hou et al., 2015	7226-439	174.4		29.3667	88.433			14.01
Hou et al., 2015	MYM12-5-8	17.5	1	30.55	82.4667			-5.49
Hu et al., 2016	DL09-01a	214	1	36.0107	97.6888	0.736354	-2.97	-2.12		76.1	0.1	12.12	1.81		0.04	0.14	0.44	3.75	4.69	0.01	2.97		1.97	0.57	1.59						215	19.3	51.5	318	72.7		24.8	70.7	137	16.3	60	13.2	0.08	12.3	1.87	10.4	1.9	5.46	0.81
Hu et al., 2016	DL09-02a	214		36.0107	97.6888					75.76	0.1	12.31	1.82		0.03	0.07	0.44	3.87	4.9	0.01	2.57		2.5	0.54	1.66						246	16.9	50.4	306	75.4		23.2	66	138	15.4	56.4	12.3	0.07	11.8	1.85	9.82	1.86	5.18	0.78
Hu et al., 2016	DL09-03a	214		36.0107	97.6888	0.704799	-2.96	-2.59		75.71	0.11	11.92	1.83		0.05	0.12	0.51	2.32	6.5	0.02	3.32		2.4	0.76	2.24						384	56.5	50.2	296	63.8		44	67.3	139	15.7	58.1	12.4	0.1	11.9	1.79	9.79	1.85	5.1	0.78
Hu et al., 2016	DL09-04a	214		36.0107	97.6888					76.48	0.11	12.21	1.76		0.04	0.11	0.54	3.75	4.67	0.01	2.67		1.85	0.64	1.77						241	22.8	51.9	327	71.5		27.2	69.5	140	15.8	58.4	12.8	0.08	12	1.8	9.54	1.85	5.11	0.74
Hu et al., 2016	DL09-05a	212	2	36.0107	97.6888	0.734031	-3.05			76.18	0.1	12.31	1.68		0.03	0.1	0.49	3.68	4.92	0.01	2.96		1.6	0.55	1.31						253	20.8	52	323	80.1		20.6	69.3	141	15.9	58.8	12.8	0.08	11.7	1.8	9.82	1.85	5.24	0.81
Hu et al., 2016	DL09-06a	212		36.0107	97.6888	0.707064	-3.06			75.69	0.1	12.22	1.82		0.03	0.16	0.61	2.77	5.73	0.01	3.07		1.71	0.62	1.69						342	46.3	54.2	329	78		24.8	71.1	142	16.4	60.6	13.8	0.11	12.3	1.88	10.4	1.95	5.58	0.82
Hu et al., 2016	QMX12-01	219.5	1.9	37.3097	90.4874	0.708892	-3.83	-3.48		66.23	0.46	15.95	3.91		0.08	1.24	1.53	3.65	5.7	0.04	6.07	29.2	4.85	5.46	2.01				17.2		212	155	22.1	267	13.06	4.852	1184.4	24.66	49.66	5.34	18.96	3.68	0.81	3.42	0.53	3.35	0.72	2.25	0.35
Hu et al., 2016	QMX12-02	220		37.3097	90.4864					67.76	0.4	15.66	3.24		0.07	0.99	1.71	3.58	5.42	0.07	5.33	32.3	5.94	5.09	2.81				18.3		204	199	20.6	266	13.768	4.856	977.4	29.04	56.42	6.02	20.74	3.65	0.82	3.22	0.48	2.95	0.64	2.01	0.31
Hu et al., 2016	QMX12-03	220		37.3097	90.4858					72.01	0.2	14.34	2.14		0.06	0.35	1.25	3.55	4.79	0.03	3.23	8.55	3.06	1.25	0.73				15.4		188	112	19.2	171	13.966	6.572	580.8	39.06	74.82	7.62	24.88	4.12	0.64	3.48	0.51	2.98	0.61	1.85	0.28
Hu et al., 2016	QMX12-06	220		37.3117	90.4858					72.72	0.21	14.42	2.09		0.04	0.31	0.72	3.83	4.44	0.04	2.95	6.75	4.93	1.04	1.76				15.7		192	85.5	19.3	199	13.14	4.984	406.8	32.34	63.9	6.78	22.74	3.97	0.51	3.38	0.5	3.07	0.64	1.95	0.3
Hu et al., 2016	QMX12-07	220		37.0995	90.7995					73.43	0.19	13.84	2.03		0.07	0.37	0.79	2.45	5.06	0.09	3.13	12.1	3.82	1.62	1.86				15.7		214	126	17.6	147	10.667	3.988	436.8	35.8	66.86	6.9	22.38	3.78	0.5	3.26	0.48	2.86	0.59	1.76	0.28
Hu et al., 2016	QMX12-08	220		37.0995	90.7995	0.709741	-3.85	-3.06		72.89	0.18	13.8	2.2		0.06	0.42	1.55	2.48	4.72	0.05	3.03	11.6	7.37	1.74	3.57				14.6		175	120	16.7	148	9.851	3.644	383	32.46	61.7	6.28	20.5	3.45	0.48	2.99	0.44	2.64	0.54	1.67	0.25
Hu et al., 2016	QMX12-09	220		37.0093	90.9399					71.3	0.23	14.56	2.79		0.04	0.56	0.63	2.59	5.41	0.09	3.61	10.2	7.68	1.89	3.47				17.4		219	124	22.2	226	26.91	5.188	778.8	44.5	83.82	8.77	28.78	4.81	0.63	3.99	0.6	3.58	0.75	2.34	0.36
Hu et al., 2016	QMX12-10	220		37.0093	90.9399					67.83	0.39	15.44	4.03		0.07	1.07	1.65	3.62	4.17	0.13	6.66	37.8	14.3	5.06	6.42				17.3		177	244	24.8	236	27.018	5.468	758.6	40.5	77.7	8.28	28.4	5.05	0.92	4.52	0.68	4.02	0.82	2.4	0.36
Hu et al., 2016	QMX12-11	220		37.0093	90.9399	0.708649	-3.46	-4.59		56.44	1.28	17.15	8.65		0.14	3.54	6.02	3.39	2.69	0.7	13	96.7	30.2	14.9	14				17.6		88	456	22.2	249	20.206	8.152	705.8	40.44	82.14	8.71	31.3	5.58	1.37	4.77	0.64	3.62	0.7	1.97	0.27
Hu et al., 2016	QMX12-12	220		37.0093	90.9399					72.28	0.18	14.1	2.5		0.06	0.5	0.93	2.27	5.23		3.63	9.99	5.67	1.6	2.36				17.1		235	146	23.4	215	26.514	5.674	699.8	50.18	93.92	9.72	31.78	5.25	0.73	4.38	0.64	3.79	0.78	2.35	0.36
Hu et al., 2016	QMX12-13	220		37.0093	90.9399					67.88	0.39	15.01	3.76		0.08	0.87	1.85	3.32	4.73	0.16	6.84	30.8	14.1	4.66	5.83				18.9		179	229	26.8	247	31.392	4.224	765.6	51.92	99.58	10.45	35.22	6.02	1.04	5.19	0.77	4.42	0.89	2.59	0.38
Hu et al., 2016	RSX12-46	228		36.1822	98.2986					71.07	0.33	14.56	3.09		0.13	0.65	1.78	3.32	4.37	0.12	5.52	26.5	6.31	2.9	3.11				18.1		164	295	19.6	201	15.824	4.568	775.4	35.82	71.38	7.67	26.74	4.74	0.97	4.03	0.57	3.28	0.65	1.91	0.28
Hu et al., 2016	RSX12-47	228		36.1818	98.2982					75.84	0.11	12.95	1.64		0.03	0.11	0.43	5.14	2.74	0.05	4.67	3.4	3.55	0.17	0.71				16.9		88.5	33.3	28.7	166	20.106	1.851	200	32.08	66.78	7.59	27.26	5.41	0.31	4.89	0.76	4.67	0.95	2.8	0.41
Hu et al., 2016	RSX12-48	227.5	1.5	36.1796	98.2975	0.708316	-5.09	-3.83		74.08	0.11	13.4	2.34		0.04	0.14	0.3	4.53	4.21		5.07	6.67	3.56	0.47	0.93				20.5		172	34.5	35.1	197	26.208	3.686	184.62	27	59.56	7.13	27.04	6.45	0.26	6.21	0.97	5.85	1.2	3.5	0.51
Hu et al., 2016	RSX12-50	228		36.1796	98.2975					75.56	0.16	12.97	1.93		0.04	0.14	0.5	3.62	4.68		5.19	3.99	2.54	0.29	0.72				17.3		156	36.8	23.9	242	18.162	1.111	708.4	39.8	80.76	8.87	31.14	5.57	0.55	4.74	0.69	4.05	0.81	2.36	0.34
Hu et al., 2016	RSX12-51	228		36.1918	98.233					74.75	0.14	12.81	2.05		0.06	0.28	0.67	4.08	4.22		4.79	6.01	5.81	0.47	2.69				16.9		148	25.5	25.3	205	20.772	2.342	193.42	37.54	77.32	8.56	30.38	5.56	0.27	4.82	0.71	4.24	0.87	2.58	0.38
Hu et al., 2016	YDE12-01	220		36.3126	98.5877					76.02	0.11	12.94	2		0.11	0.3	0.87	3.5	3.21		4.44	4.02	2.67	0.69	1.94				15.8		123	60.9	23.8	111	23.1	3.83	761.2	52.7	98.44	9.68	31.22	5.17	0.85	4.7	0.67	3.97	0.81	2.33	0.34
Hu et al., 2016	YDE12-02	220		36.3046	98.6112	0.708852	-4.73	-3.24		72.8	0.24	13.51	2.22		0.07	0.46	1.38	3.6	4.25	0.04	5.07	9.08	3.82	1.32	1.25				16		159	105	35.1	144	18.18	6.83	766.2	33.36	65.28	6.95	24.24	4.85	0.77	4.87	0.8	5.1	1.1	3.34	0.51
Hu et al., 2016	YDE12-03	220		36.287	98.6009					72.44	0.24	13.85	3.35		0.08	0.26	0.86	3.52	4.26	0.02	11.2	10.5	3.96	1.54	1.23				17		138	99.3	35	257	21.112	4.678	936.34	57.33	115.2	12.64	45.16	8.5	1.54	7.66	1.08	6.17	1.23	3.59	0.52
Hu et al., 2016	YDE12-16	220		36.2205	98.7061					75.36	0.15	13.07	1.75		0.03	0.23	1.21	2.72	4.35		5.07	6.75	3.3	0.97	0.77				15.6		173	64.7	32.3	97	22.824	6.764	628.6	34.06	67.46	7.43	26.54	5.57	0.61	5.31	0.84	5.19	1.08	3.23	0.48
Hu et al., 2016	YNG12-01	218		37.5751	89.7853	0.707766	-2.44	-2.85		52.11	1.18	17.76	8.78		0.14	3.97	6.25	4.68	2.43	0.48	21.6	178	51	21.7	14.5				19.1		140	531	24	230	20.922	4.448	691	35.16	70.8	8.04	30.14	5.71	1.63	5.17	0.7	4.05	0.79	2.19	0.29
Hu et al., 2016	YNG12-03	218.1	2.5	37.5751	89.7853	0.707017	-2.18	-3.39		50.4	1.4	17.06	9.52		0.16	5.11	8.47	2.48	1.33	0.6	21.3	169	95	26.2	42.8				17.5		40.4	599	24.5	218	29.565	3.744	559.2	37.96	79.12	8.6	32.44	6.11	1.84	5.47	0.73	4.22	0.81	2.27	0.3
Hu et al., 2016	YNG12-04	218		37.5751	89.7853					50.35	1.44	16.64	9.91		0.16	5.34	8.45	2.46	1.22	0.62	22.5	186	94.1	26.3	42.5				18.1		42.7	611	26.9	225	30.631	4.206	574.4	40.86	84.64	9.4	35.68	6.72	1.97	6.06	0.81	4.62	0.88	2.47	0.32
Hu et al., 2016	YNG12-05	218		37.5751	89.7853		-2.59	-3.92		51.82	1.43	17.05	9.2		0.15	4.65	7.02	3.58	2.64	0.6	22.3	168	84.5	22.6	29.3				18.4		135	695	25.9	269	30.821	10.11	818.6	49.66	97.6	10.2	37.32	6.73	1.97	5.96	0.78	4.45	0.85	2.36	0.31
Hu et al., 2016	YNG12-06	218		37.5751	89.7853					51.76	1.4	16.9	9.3		0.15	4.59	7.32	3.36	2.58	0.6	21.9	168	80.7	23.3	33.6				18.6		119	681	26.7	279	31.93	11.766	958.2	49.92	99.34	10.38	38.18	6.94	2.03	6.1	0.8	4.58	0.87	2.41	0.32
Hu et al., 2016	YNG12-07	218		37.5751	89.7853					51.86	1.47	16.83	9.32		0.19	3.72	6.72	3.62	2.66	0.75	20	155	68.2	21.2	28.3				18.5		163	492	27.7	305	34.631	8.762	806.6	46.46	96.8	10.57	39.68	7.31	2.14	6.44	0.85	4.76	0.9	2.51	0.33
Hu et al., 2016	YNG12-08	218		37.5751	89.7853	0.707185	-2.4	-3.24		51.97	1.41	16.87	9		0.19	3.85	6.55	3.84	2.59	0.71	19.6	147	65.1	21	26.5				18		172	513	27.5	299	33.755	5.24	822.2	45.3	94.88	10.34	38.94	7.2	2.15	6.35	0.83	4.67	0.89	2.46	0.33
Hu, P., et al., 2017	12T031	116		31.7	90.7					59.98	0.7	16.15	6.28		0.11	3.16	3.88	4.08	3.07	0.16	16.6	128	19.7	16.4	10.4				17.8		122	296	23.8	156	9.15	2.29	458	32.2	63.4	7.16	28	4.85	1.11	4.37	0.67	4.23	0.83	2.35	0.41
Hu, P., et al., 2017	12T032	116		31.7	90.7					59.49	0.67	16.2	6.05		0.11	3.03	4.12	4.14	3	0.15	16.5	126	20.2	16.5	10.8				18.1		135	324	23.4	149	9.52	2.75	503	30.7	60	6.77	26.1	4.73	1.08	4.16	0.62	4.07	0.83	2.34	0.37
Hu, P., et al., 2017	12T033	116		31.7	90.7					58.85	0.71	16.17	6.14		0.11	3.64	4.58	3.33	3.08	0.16	18.1	134	27.9	17.4	11.8				17.9		131	323	24.5	159	9.07	3.16	607	31.2	61.9	7.02	27.2	4.93	1.11	4.53	0.68	4.09	0.85	2.37	0.4
Hu, P., et al., 2017	12T035	116		31.7	90.7					59.52	0.72	16.35	6.04		0.11	3.55	3.93	3.82	3.45	0.16	17.3	131	24.7	16.7	9.7				17.8		143	328	24.4	159	8.97	3.03	652	31.2	62.3	7.03	27.7	4.78	1.11	4.44	0.7	4.3	0.89	2.42	0.41
Hu, P., et al., 2017	12T036	112.9	0.8	31.667	90.617			-2.49		58.84	0.7	16.1	6.43		0.12	3.32	4.78	4.34	2.74	0.16	16.9	128	22.9	17.2	9.47				17.9		112	305	23.5	159	8.89	2.22	436	31.3	62.8	7.18	27.2	4.81	1.12	4.36	0.64	4.22	0.85	2.34	0.38
Hu, P., et al., 2017	13T034	116.8	0.7	31.7168	90.9005			-4.0381		59.47	0.69	16.16	6.21		0.11	3.17	4.11	4.17	3.1	0.15	16.9	131	17.8	16.9	9.79				18.6		127	288	24.4	162	9.52	2.27	518	32.5	64.5	7.21	27.9	5.04	1.1	4.36	0.65	4.19	0.86	2.42	0.41
Hu, P., et al., 2017	13T045	116		31.7	90.7					78.17	0.08	14.17	0.51		0.01	0.24	0.2	0.01	2.44	0.02	1.89	2.73	13.5	0.19	1.38				14.9		119	9.87	5.04	60.7	11.2	3.25	110	15.6	27.6	2.96	9.97	1.89	0.37	1.54	0.2	1.12	0.19	0.57	0.12
Hu, P., et al., 2017	13T046	116.3	1.2	31.918	90.8666			-0.711111
Hu, P., et al., 2017	13T047	116		31.7	90.7					77.93	0.08	14.51	0.52		0.01	0.23	0.17	0.01	2.41	0.02	1.48	1.58	10.1	0.13	1.64				15		116	11.9	5.91	61.1	11.1	2.93	160	19.5	34.6	3.55	12.6	2.29	0.46	2.01	0.28	1.31	0.24	0.63	0.13
Hu, P., et al., 2017	13T048	116		31.7	90.7					78.05	0.07	14.31	0.53		0	0.23	0.22	0.01	2.28	0.02	1.47	2.56	5.4	0.16	2.7				13.9		104	33.6	5.23	57.4	10.8	2.42	931	17.8	30.9	3.43	11.7	2.11	0.49	1.8	0.24	1.15	0.2	0.59	0.12
Hu, P., et al., 2017	13T049	116		31.7	90.7					77.69	0.08	14.52	0.85		0.01	0.25	0.21	0.01	2.47	0.03	2.14	2.26	4.86	0.33	2.28				15.9		127	17.5	7.11	57.5	11.9	4.73	324	18.4	28.1	3.42	12.1	2.17	0.52	1.99	0.3	1.48	0.29	0.81	0.16
Hu, P., et al., 2017	13T050	116		31.7	90.7					76.57	0.07	14.33	0.54		0.01	0.24	1.01	0.01	2.4	0.03	2.45	1.15	9	0.31	1.94				16.5		120	17.4	10.2	56.7	11.9	4.67	239	21.5	37	4.1	14.1	2.66	0.59	2.51	0.37	1.9	0.35	0.96	0.17
Hu, P., et al., 2017	13T086	116		31.7	90.7					62.4	0.64	15.16	4.11		0.07	2.39	3.74	3.51	3.42	0.21	9.73	78	72	12.6	25.4				17.2		135	610	15.1	172	12.2	6.2	549	30.4	54.6	5.94	22.3	4.07	0.97	3.84	0.56	3.02	0.58	1.45	0.28
Hu, P., et al., 2017	13T087	116		31.7	90.7					59.98	0.77	15.36	4.93		0.09	3.08	4.17	4.12	2.86	0.26	11.6	94.1	81.1	15.9	38.3				17.1		106	590	16.3	181	13.3	4.81	556	34.4	63.1	6.75	25.7	4.43	1.12	4.35	0.61	3.37	0.62	1.58	0.3
Hu, P., et al., 2017	13T089	116		31.7	90.7					60.07	0.78	15.53	4.95		0.08	3.08	3.88	4.25	2.82	0.26	11.3	94.8	66.5	15.7	36.8				17.3		128	494	15.7	174	12.8	5.35	447	31.7	57.3	6.37	23.9	4.17	1.15	4.15	0.61	3.11	0.62	1.64	0.3
Hu, P., et al., 2017	13T090	116		31.7	90.7					59.25	0.79	15.39	5		0.07	3.12	4.06	3.61	2.76	0.26	12	94.6	70.3	15.9	39.4				16.9		125	439	16	178	13	6.26	488	32.2	58.7	6.46	24.8	4.23	1.06	4.13	0.62	3.38	0.62	1.67	0.31
Hu, P., et al., 2017	13T091	114.3	0.8	32.0633	90.7236			4.39565		60.28	0.78	15.57	5.02		0.08	3.05	3.76	3.98	3.05	0.27	11.3	92.3	66.8	15.1	37.3				16.9		120	549	15.8	178	12.7	6.44	513	31.8	57.5	6.43	24.7	4.4	1.11	4.01	0.63	3.39	0.62	1.65	0.29
Hu, P., et al., 2017	13T109	118.4	0.8	32.1027	90.685			4.03043
Hu, P., et al., 2017	13T110	116		31.7	90.7					67.95	0.47	15.85	2.53		0.04	0.71	2.37	3.99	4.22	0.11	8.18	30	0.27	4.2	12.5				19.9		143	281	22.4	312	19.3	3.61	682	75.6	134	14	49.6	7.71	1.34	7.31	1.02	5.15	0.98	2.46	0.47
Hu, P., et al., 2017	13T111	116		31.7	90.7					65	0.53	14.53	3.32		0.06	1.9	3.15	4.09	2.81	0.15	7.54	57.2	41.7	10.6	28.3				17.7		145	254	14.1	166	12.7	7.59	468	27.3	61.8	5.84	21.9	3.93	0.85	3.75	0.53	2.85	0.56	1.44	0.28
Hu, P., et al., 2017	13T113	116		31.7	90.7					63.17	0.68	16.18	5.98		0.09	1.22	3.11	4.2	3.4	0.28	11.9	27.9	12.2	7.77	7.33				22.3		104	496	28.1	591	21.4	2.76	765	53.6	101	11.3	42.3	7.73	1.97	7.28	1.04	5.86	1.16	2.96	0.55
Hu, P., et al., 2017	13T114	116		31.7	90.7					63.13	0.7	16.09	6.18		0.09	1.24	2.99	4.2	3.32	0.29	12.4	27.7	2.61	6.74	6.58				21.3		90.8	444	28.1	601	21.6	2.01	736	51.9	100	11.1	42.2	7.4	1.89	7.06	1.09	5.77	1.1	2.83	0.52
Hu, P., et al., 2017	13T116	116		31.7	90.7					62.86	0.69	16.1	6.11		0.09	1.21	3.19	4.17	3.25	0.28	12.1	27.7	2.34	8.04	5.85				21.6		93.8	456	27.2	581	20.8	2.31	744	52.4	97.4	10.8	41.3	7.3	1.89	6.96	1.02	5.56	1.06	2.64	0.52
Hu, P., et al., 2017	13T117	116		31.7	90.7					65.04	0.61	14.88	3.65		0.09	1.64	2.55	4.57	3.83	0.17	9.29	58.4	25.7	8.22	21.9				18.1		158	407	20.6	246	17.5	3.93	625	43.2	84	8.23	29.5	5.06	1.1	5.26	0.76	4.16	0.85	2.08	0.41
Hu, P., et al., 2017	13T118	116.7	0.6	32.1007	90.7454			4.196		65	0.49	14.42	3.28		0.06	2.12	3	4.33	3.07	0.14	7.81	56.8	66.2	11.4	32.6				16.5		160	352	13.3	148	11.9	6.22	479	31.3	57.7	5.89	21.2	3.7	0.87	3.55	0.52	2.74	0.51	1.28	0.23
Hu, P., et al., 2017	14T127	116		31.7	90.7					58.21	0.73	16.32	6.57		0.09	3.64	4.64	3.21	3.33	0.16	19.1	141	20.5	18.8	12				16.7		137	299	21.2	150	9.12	4.04	535	30.1	62.6	6.49	24.5	5.33	1.14	5.04	0.71	4.45	0.9	2.61	0.37
Hu, P., et al., 2017	14T128	116		31.7	90.7					58.68	0.74	16.17	6.72		0.12	3.42	4.8	3.99	2.8	0.16	18.4	140	18.8	18.4	11.1				16.6		100	278	21.9	156	8.89	1.56	410	31.1	64.8	6.72	25.2	5.3	1.16	5.16	0.77	4.41	0.9	2.63	0.38
Hu, P., et al., 2017	14T129	116		31.7	90.7					57.72	0.75	15.84	6.98		0.12	3.89	4.85	3.29	3	0.16	21.2	148	24.4	20	11.5				16.9		136	325	22.3	151	8.91	3.12	543	30.7	63	6.61	25.8	5.36	1.17	5.31	0.75	4.53	0.96	2.75	0.41
Hu, P., et al., 2017	14T130	116		31.7	90.7					58.74	0.75	16.24	6.79		0.11	3.58	3.76	3.75	3.28	0.16	18.4	138	20.3	18.7	11.3				16.5		117	293	21.2	152	9.16	3.96	440	29.5	62.2	6.5	25.8	5.3	1.19	5.21	0.74	4.58	0.92	2.69	0.4
Hu, P., et al., 2017	14T131	116		31.7	90.7					58.91	0.75	16.16	6.83		0.11	3.82	4.12	3.16	3.67	0.16	19.5	141	21.5	19.3	9.94				17		154	346	21.9	155	9.16	3.51	574	31.3	64.6	6.66	27	5.46	1.14	5.17	0.75	4.47	0.93	2.71	0.4
Hu, P., et al., 2017	14T132	116		31.7	90.7					58.72	0.74	16.27	6.63		0.09	3.55	4.28	3.19	3.32	0.16	17.8	140	18.8	19	11				16.3		110	282	20.8	150	8.99	4.04	459	29.3	61.8	6.51	25.4	5.18	1.12	4.94	0.71	4.32	0.87	2.6	0.38
Hu, P., et al., 2017	14T133	116		31.7	90.7					57.95	0.76	15.94	7.11		0.12	3.64	5.02	3.82	2.73	0.16	19.9	147	20.8	20.1	10.4				17		108	283	21.8	154	9.04	1.53	429	30.3	63.7	6.61	26.9	5.42	1.14	5.28	0.75	4.5	0.94	2.72	0.4
Hu, P., et al., 2017	14T134	116		31.7	90.7					59.35	0.74	16.24	6.66		0.12	3.54	4.56	3.38	2.86	0.16	18.2	137	19.9	18.3	10.2				16.6		128	423	21.5	154	9.19	3.82	626	31.7	65.1	6.69	26.7	5.48	1.17	5.08	0.73	4.34	0.93	2.67	0.39
Hu, X., et al., 2017	D3349-1	111		32.5673	83.0913					50.79	1.25	17.55	8.76		0.11	6.66	5.46	5.25	0.08	0.26		183	78.4	24.9	36.4	193		110			33	248	24.3	244	18.6	1.45	261	22	45.5	5.52	23.5	5.14	1.49	5.03	0.81	4.64	1	2.62	0.41
Hu, X., et al., 2017	D3351-1	111		32.5615	83.0576					55.69	1.01	15.66	7.16		0.1	2.93	7.36	3.64	1.76	0.19		199	42.6	22.1	14.3	40.4		76.3			109	958	23.2	171	7.2	2.97	638	20.3	41.7	5.22	21.5	4.59	1.27	4.39	0.7	4.22	0.93	2.49	0.42
Hu, X., et al., 2017	D3544-2	111		32.5845	83.0246					51.21	1.12	18.09	8.44		0.14	5.36	6.32	4.36	0.84	0.19		270	435	41.5	179	79.8		58.3			12.2	507	29	105	16.8	1.72	492	9.56	23.7	3.5	16.9	4.64	1.5	5.25	0.87	5.47	1.19	3.29	0.5
Hu, X., et al., 2017	D3545-1	111		32.5818	83.0287					52.42	1.12	17.31	7.97		0.09	4.34	8.9	2.49	0.82	0.21		114	37.9	17.4	15.1	42		63.5			58.2	552	23.2	155	11.1	11	521	20.8	41.5	5.13	21.6	4.81	1.45	4.68	0.74	4.37	0.92	2.43	0.4
Hu, X., et al., 2017	D3545-3	111		32.5818	83.0287					47.19	1.04	16.48	8.81		0.17	7.17	10.37	2.98	0.51	0.16		99.4	32	16.8	11.3	26.3		62.6			64.9	690	26.2	141	7.8	5.6	815	9.6	23.6	3.31	15.5	4.15	1.36	4.61	0.77	4.86	1.07	2.81	0.46
Hu, X., et al., 2017	D3554-1	111		32.5742	83.1016					57.87	1.05	16.57	7.35		0.13	3.16	4.94	3.88	2.3	0.32		94.5	21.1	14.1	3.1	73.2		39.2			21.1	1343	26.2	291	14.4	2	124	36.7	73.9	9.36	33.9	6.74	1.84	6.19	0.95	5.19	1.07	2.76	0.43
Hu, X., et al., 2017	D3711-1	111		32.5917	83.0523					51.66	0.92	16.92	8.08		0.13	6.64	7.15	3.29	1.1	0.21		158	33	15.1	6.2	23.9		107			52.7	643	22.3	158	11.3	4.01	693	19.1	36.9	4.66	20.1	4.46	1.4	4.4	0.72	4.15	0.89	2.31	0.37
Hu, X., et al., 2017	D5434-1	111		32.5081	83.3056					51.36	1.19	16.29	8.36		0.1	4.09	4.72	3.02	2.54	0.27		86.7	22.6	11.6	3.3	5.2		89.4			125	603	23.6	217	16	5.23	1425	29.7	57.6	6.7	26.9	5.59	1.5	5.24	0.81	4.49	0.96	2.49	0.39
Hu, X., et al., 2017	D5538-1	111.2	1.3	32.5053	83.285	0.7047	0.68			54.95	1.37	17.09	7.58		0.09	3.88	4.28	5.54	1.87	0.26		67.5	24.8	17.2	5.6	11.6		74.3			113	505	25.4	271	15	5.93	491	25.9	50.9	6.31	26.2	5.87	1.69	5.54	0.87	4.86	1.04	2.69	0.43
Hu, X., et al., 2017	D5629-1	111		32.4847	83.4037					51.17	1.08	16.18	8.62		0.16	4.68	5.76	4.09	1.22	0.3		57.8	63.5	29.9	14.6	16.4		18			28.4	45.5	23.9	37.3	4.3	1.87	128	28	51.9	6.34	26.8	6.04	1.72	5.34	0.78	4.56	0.93	2.45	0.39
Hu, X., et al., 2017	D5629-2	111		32.4839	83.4095					51.8	0.81	16.85	8.59		0.16	4.47	6.77	4.89	0.39	0.3		168	64	16.7	6.2	3.1		49.5			78.6	708	19.5	151	10.8	1.95	652	23.4	44.1	5.54	23.8	5.29	1.48	4.62	0.68	3.72	0.78	2.01	0.33
Hu, X., et al., 2017	D5727-1	111		32.4859	83.3799					43.11	1.01	15.94	9.38		0.13	11.04	6.61	2.6	0.02	0.24		80.6	35.2	26.8	10.5	32.4		55.7			76.5	443	17.2	133	6.6	7.51	422	19.9	35.6	4.33	18.2	4.01	1.23	3.73	0.57	3.3	0.68	1.77	0.31
Hu, X., et al., 2017	D6631-1	111		32.5202	83.3038	0.7043	4.33			62.97	0.91	16.48	4.9		0.08	2.27	2.84	3.35	3.36	0.35		258	48.6	26.2	12.5	38.5		87.7			91.3	1206	31.8	183	9.6	2.26	780	36.8	65.9	7.39	29.3	6.1	1.75	6.03	0.94	5.68	1.28	3.48	0.6
Hu, X., et al., 2017	D6632-3	111		32.517	83.2958					48.51	1.54	16.14	8.36		0.2	5.49	7.46	4.14	0.58	0.35		133	33.8	21.2	13.3	8.4		83			92.9	668	27.9	371	22.5	3.66	664	29.3	56.4	6.85	28.4	6.17	1.77	5.99	0.95	5.28	1.14	2.92	0.46
Hu, X., et al., 2017	D7112-1	111		32.5748	82.9816					57.89	0.95	14.84	7.15		0.07	2.99	4.34	6	1.14	0.18		141	57.3	22.9	60.5	17		61.7			35.9	448	22.6	229	15.5	2.31	248	28	52.7	6.13	24.7	5.2	1.45	4.84	0.76	4.27	0.9	2.36	0.4
Hu, X., et al., 2017	D7317-1	111		32.5838	82.9644					59.82	1.06	15.35	8.59		0.13	1.25	3.2	3.71	2.63	0.47		98.1	39.9	21.9	6.4	6.5		109.6			94.7	308	42.1	307	19.4	15.9	931	45.2	93.7	11.9	42.9	9.27	2.35	8.92	1.4	7.97	1.69	4.64	0.72
Hu, X., et al., 2017	D7414-1	111		32.5737	82.9351					58.63	0.77	15.83	6.64		0.1	4.46	5.42	3.33	1.72	0.22		132	147	30.7	94	20.8		76.9			55.9	539	14.2	167	10.8	2.58	487	27	46.4	5.25	20.6	4.12	1.16	3.53	0.52	2.7	0.56	1.4	0.24
Hu, X., et al., 2017	D7419-1	111		32.5675	82.9479					63.68	0.83	16.15	4.4		0.08	0.72	1.65	7.93	1.53	0.32		75	25.3	20	5.2	15.9		67.2			43.6	568	26.8	391	24.2	4.62	322	48.6	91.6	10.9	37.2	6.94	1.63	5.89	0.89	5.08	1.04	2.93	0.46
Hu, X., et al., 2017	D7427-1	111		32.5694	82.7993					61.82	0.66	16.23	5.2		0.07	2.99	4.08	4.26	0.82	0.16		102	100	24	53.7	20.7		62.8			33.1	495	15.1	158	11.4	3.06	599	23.8	41.4	4.9	19.3	4.01	1.16	3.43	0.54	2.84	0.58	1.54	0.26
Hu, X., et al., 2017	GI004	111		32.5718	82.8029	0.7048	3.64			59.4	0.68	15.89	5.06		0.08	1.31	5.62	4.3	1.87	0.25		101	72	19.2	36.8	174		70.7			58.5	557	20.2	200	13.7	5.09	611	30.1	49.7	5.75	21.4	4.1	1.2	3.68	0.62	3.12	0.7	1.85	0.29
Hu, X., et al., 2017	GY001-1	110.9	1	32.5758	82.9615	0.7047	1.77	6.8		67.08	0.79	13.86	5.44		0.07	0.28	1.81	4.12	4.07	0.38		38	17	6.6	8	12.3		50			100	481	19	152	18.3	2.49	902	35.2	71.7	8.06	30	5.24	1.45	4.21	0.61	3.58	0.69	2.01	0.28
Hu, X., et al., 2017	GY001-2	111		32.5755	82.9686					66.15	0.84	15.17	5.59		0.06	0.28	1.21	4.67	4.4	0.39		35	11	6.9	5.5	8.7		51			114	556	20.3	159	21.2	2.51	681	36.7	81.5	7.83	29.4	5.48	1.32	4.15	0.63	3.82	0.74	1.99	0.29
Hu, X., et al., 2017	GY001-3	111		32.5755	82.9686					66.4	0.82	14.55	5.53		0.07	0.31	1.77	4.23	4.28	0.38		35	12	6.9	4.5	7.4		51			109	541	20.3	162	20.5	2.45	791	37.5	76.4	8.29	31.9	5.5	1.44	4.22	0.62	3.76	0.75	2.12	0.3
Hu, X., et al., 2017	GY001-4	111		32.5717	82.965					67.85	0.8	14.23	5.25		0.07	0.27	1.33	4.59	4.13	0.38		29	15	6.7	4.4	6		50			102	487	20.5	169	19.7	2.06	641	38.4	79.1	7.9	29.2	5.18	1.39	4.12	0.63	3.63	0.68	2.13	0.29
Hu, X., et al., 2017	GY001-5	111		32.569	82.9597					67.72	0.79	14.07	5.22		0.07	0.3	1.87	4.2	4.05	0.37		33	17	6.4	4.3	8.2		51			101	514	19.4	158	19.1	2.39	770	36.1	72.8	7.73	29.1	5.09	1.41	4	0.59	3.67	0.69	2.16	0.3
Hu, X., et al., 2017	KJ005	111		32.5963	83.011					52.36	1.3	16.35	7.84		0.11	4.27	3.58	5.15	2.02	0.42		164	58.8	23.6	16.7	20.3		107			55.7	452	39.1	245	23.6	7.56	460	36.4	64.7	8.32	33.3	6.75	1.25	4.42	1.02	8.31	1.35	4.56	0.57
Hu, Y., et al., 2017	CJZK1119-01	15		29.608	89.979					68.8	0.32	14.5	2.39		0.11	0.89	1.67	0.38	6.2	0.13	3.3	38	15	6.2		97.7		416	19.7		327	189	4.6		3.9	31.4	830	22.4	44.4	5.14	18.8	2.95	0.65	1.73	0.19	0.89	0.15	0.37	0.05
Hu, Y., et al., 2017	CJZK1119-03	15		29.608	89.979	0.706647	-2.87537			66.7	0.32	14.9	2.15		0.05	1.2	2.52	0.68	5.9	0.13	3.5	38	16	5.3		22.7		66	20.6		340	195	4.9		4	36.2	760	21.2	41.3	4.79	17.9	2.97	0.66	1.71	0.19	0.95	0.17	0.43	0.06
Hu, Y., et al., 2017	CJZK1119-04	15		29.608	89.979					71.2	0.33	14.2	1.73		0.05	0.8	1.1	0.12	6.18	0.14	3.3	34	19	4.9		730		408	20.6		326	149	4.3		4.1	31.7	600	20	38	4.39	16.8	2.92	0.59	1.68	0.18	0.84	0.15	0.38	0.05
Hu, Y., et al., 2017	CJZK1119-05	15		29.608	89.979					67.2	0.38	15.4	1.61		0.05	0.93	2.06	0.19	6.6	0.16	3.7	40	15	4.5		2360		1920	20.9		322	253	5.4		3.1	37	770	24.1	49.5	5.91	22.3	3.74	0.79	2.21	0.24	1.12	0.19	0.48	0.07
Hu, Y., et al., 2017	CJZK1119-06	15		29.608	89.979	0.706216	-3.77426			66.7	0.38	15.1	2.19		0.02	1.02	2.57	4	4.86	0.17	4.4	42	20	4.5		1140		24	21.5		229	765	6.5		4.6	15.3	910	31.6	60.9	6.98	25.8	4.2	0.84	2.39	0.26	1.29	0.22	0.56	0.08
Hu, Y., et al., 2017	CJZK1119-07	15		29.608	89.979					68.3	0.35	15.1	2.07		0.02	0.84	1.58	4.91	3.66	0.14	2.6	36	13	4.1		798		28	20.5		177	508	4.6		4.1	14.7	730	26.7	50.6	5.72	21.1	3.31	0.66	1.84	0.2	0.91	0.16	0.41	0.06
Hu, Y., et al., 2017	CJZK1119-08	15		29.608	89.979	0.706325	-3.4007			67.8	0.38	14.8	1.78		0.01	1.05	2.49	4.04	4.49	0.16	4.1	40	17	4.2		1745		16	20.5		208	674	6		3.6	12	850	28.3	54.7	6.31	23.6	3.88	0.8	2.23	0.25	1.17	0.2	0.51	0.07
Hu, Y., et al., 2017	CJZK1119-10	15		29.608	89.979					67.2	0.36	14.3	2.08		0.02	0.94	2.29	3.43	4.73	0.16	3.7	38	20	4.8		1970		26	19.7		229	569	5.7		3.6	18	770	28.5	54.8	6.3	23.4	3.78	0.8	2.15	0.24	1.15	0.19	0.5	0.07
Hu, Y., et al., 2017	CJZK1119-11	15		29.608	89.979					66.1	0.4	14.5	2.11		0.02	0.99	2.58	3.95	4.46	0.17	3.9	42	17	3.9		2760		25	19.9		204	638	5.7		3.7	15.8	700	26	49.9	5.82	21.6	3.59	0.76	2.15	0.25	1.15	0.2	0.49	0.07
Hu, Y., et al., 2017	CJZK1119-12	15		29.608	89.979	0.706122	-3.29907			66.9	0.4	14.8	2.15		0.01	1.02	2.48	4.14	4.43	0.17	3.7	42	18	4.4		1700		22	20.4		204	695	5.6		3.7	15	820	27.8	53.8	6.23	23.3	3.77	0.81	2.2	0.25	1.15	0.19	0.48	0.06
Hu, Y., et al., 2017	CJZK1407-02	14.8	0.3	29.6141	89.9862					75.4	0.36	11.8	2.7		0.04	0.74	0.72	0.2	4.29	0.14	3.79	64.2	20.4	6.43		4243		1188	15.6		314	72.3	4.5	94.8	6.12	22.6	501	23.4	44.7	5.21	20.4	3.09	0.55	1.53	0.21	0.95	0.18	0.46	0.06
Hu, Y., et al., 2017	CJZK1407-03	15		29.6141	89.9862					67.8	0.44	15.9	1.89		0.01	1.43	2.02	4.5	4.15	0.18	4.88	55.2	21.6	4.54		979		28.2	18.2		216	573	5.82	113	6.97	16.3	694	30.5	57.7	6.73	24.9	3.84	0.8	2.07	0.27	1.21	0.23	0.56	0.08
Hu, Y., et al., 2017	CJZK1407-04	15		29.6141	89.9862					68.4	0.42	15.4	2.42		0.02	1.28	2.28	4.35	3.65	0.16	4.46	52	20.9	5.61		514		28.6	18.8		185	687	7.12	122	8.22	14.1	551	33.4	63.6	7.11	26.7	4.03	0.81	2.19	0.29	1.45	0.26	0.66	0.1
Hu, Y., et al., 2017	CJZK1407-05	12.9	0.3	29.6141	89.9862	0.705926	-2.55779			64.8	0.36	15.3	2.34		0.14	1.24	2.91	3.5	4.06	0.14	3.24	42.6	14.1	5.52		4.6		155.7	17.8		224	1016	5.03	109	4.63	25.1	907	24	45.6	5.42	20.4	3.09	0.68	1.68	0.22	1.08	0.19	0.48	0.07
Hu, Y., et al., 2017	CJZK1407-08	15		29.6141	89.9862					68.6	0.45	15.1	2.04		0.02	1.45	1.72	4.09	4.35	0.18	5.09	57.1	28.4	6.24		1304		32.3	17.2		218	453	6.9	107	7.67	21.4	694	31.7	61.6	7.2	28.1	4.4	0.9	2.44	0.31	1.51	0.27	0.68	0.1
Hu, Y., et al., 2017	CJZK1407-09	14.9	0.3	29.6141	89.9862	0.706249	-3.3373			68.5	0.43	15.5	2.27		0.02	1.34	2.01	4.3	3.54	0.17	4.75	53	18.9	5.79		565		36.6	18		186	575	6.53	106	6.95	16.6	876	29.3	55.6	6.64	24.7	3.89	0.8	2.15	0.28	1.36	0.24	0.6	0.09
Hu, Y., et al., 2017	CJZK1407-10A	15		29.6141	89.9862					68	0.36	15.8	1.95		0.05	0.5	1.57	5.42	3.73	0.13	3.26	39.3	10.8	4.33		7.37		129	19.4		164	380	5.18	98.7	4.8	13.6	713	20.5	38.7	4.63	17.2	2.67	0.61	1.5	0.2	1	0.18	0.47	0.06
Hu, Y., et al., 2017	CJZK1407-10B	15		29.6141	89.9862					66.9	0.36	15.4	2.02		0.05	0.88	2.71	4.19	3.42	0.13	3.2	41.1	10.6	4.71		7.08		57.3	19		153	333	4.77	101	4.48	17.9	643	21.7	41.2	4.88	18.3	2.85	0.62	1.59	0.21	0.98	0.18	0.44	0.06
Hu, Y., et al., 2017	CJZK1407-11	15		29.6141	89.9862					68.3	0.43	15.3	2.62		0.01	1.39	1.83	4.2	4.09	0.18	4.65	56	22.1	4.62		505.4		31	17.9		198	529	6.67	121	7.86	13.5	746	30	56.6	6.76	24.7	3.97	0.81	2.13	0.28	1.35	0.24	0.63	0.09
Hu, Y., et al., 2017	CJZK1407-12	15		29.6141	89.9862	0.706053	-3.34727	3.9	6.2	68.6	0.45	16	2.27		0.01	1.39	1.41	4.5	3.76	0.15	5.05	57.9	23.6	4.24		523		46.2	19.5		189	571	7.05	117	7.3	11.4	795	27.4	54.7	6.52	24.6	3.94	0.83	2.27	0.31	1.43	0.27	0.66	0.1
Hu, Y., et al., 2017	CJZK1407-13	15		29.6141	89.9862	0.706341	-3.54895	3.4	6	68.1	0.43	15.5	1.86		0.01	1.25	2.05	4.02	4.47	0.17	4.7	53.2	19.8	5.22		2389		30.9	19.4		224	560	6.76	112	7.72	25.2	650	30.3	59.3	7.1	26.5	4.13	0.84	2.27	0.29	1.36	0.25	0.64	0.09
Hu, Y., et al., 2017	CJZK1407-14	15		29.6141	89.9862	0.706419	-3.6816			63.4	0.53	15.6	3.53		0.13	1.76	2.97	4.83	3.81	0.2	5.72	71	23.8	8.28		48.5		83.2	20.2		164	623	6.81	136	5.24	8.53	1041	27.1	54.2	6.95	27.1	4.41	0.93	2.56	0.32	1.48	0.26	0.66	0.09
Huang et al., 2015	CM10-04-02	12.5	0.5	30.881	86.6732					59.84	1.4	13.13	4.11		0.05	4.44	3.36	1.21	9.24	0.07	12	100.9	215	14.5	119						291.2	522.7	8.6	911.2	61.9		3175.8	61.57	140.7	18.66	68.06	9.93	1.42	4.63	0.54	2.58	0.4	1.14	0.14
Huang et al., 2015	CM10-04-04	12		30.881	86.6732	0.7192	-12.95			56.63	1.66	10.83	6.07		0.08	7.18	5.49	1.75	6.89	0.3	17.3	103.9	396.1	24	210.4						753.9	838.8	15	952.5	53.2		4465.3	113.61	260.2	34.78	138.1	20.13	3.16	9.9	1.03	4.48	0.65	1.81	0.22
Huang et al., 2015	CM10-04-05	12		30.881	86.6732					57.64	1.75	11.49	5.15		0.08	6.76	5.18	0.91	7.8	0.12	21.5	136.1	455	23.2	227.8						252.9	623.3	13.7	919.6	55.6		5216.7	115.61	257.5	34.74	131.9	19.45	2.87	9.18	0.92	4.15	0.62	1.65	0.2
Huang et al., 2015	CM10-04-08	12		30.881	86.6732	0.719101	-13.08			55.95	1.69	11.04	5.99		0.07	7.53	5.61	1.56	6.63	0.55	26.9	115.8	360.4	22.7	213.3						604.1	984.5	16.2	885.9	52		3881.1	122.96	269.9	35.32	128.6	18.53	2.92	8.3	0.86	3.91	0.58	1.61	0.17
Huang et al., 2015	CM10-04-10	12		30.881	86.6732					58.34	1.62	13.82	5.66		0.06	5.03	4.09	1.86	8.23	0.16	17.5	107.1	220.9	19.8	145.2						641.9	1200.8	15.4	779.7	39.5		2867.9	69.31	174.5	24.85	102.7	17.14	3.45	7.75	0.82	3.7	0.57	1.55	0.19
Huang et al., 2015	CM10-04-12	12		30.881	86.6732	0.719591	-13.56			55.99	1.56	11.1	7.53		0.08	6.96	5.84	1.77	6.11	0.08	22.2	146.6	449.6	30.4	215.2						504.3	999.8	12.8	740.5	52.7		3626.3	49.65	153.4	19.6	82.07	14.62	2.37	7.66	0.83	3.67	0.57	1.62	0.21
Huang et al., 2015	CM10-04-14	12		30.881	86.6732	0.721975	-14.2			59.99	1.5	13.01	4.45		0.05	4.5	3.57	2.25	8.1	0.07	22.9	113.8	260.8	15.3	137.8						1335.1	556.1	9.9	738.9	52.2		3038.6	57.83	129.8	17.07	60.5	9.09	1.35	4.6	0.54	2.47	0.38	1.05	0.13
Huang et al., 2015	CM10-04-15	12		30.881	86.6732					59.97	1.31	14.12	4.61		0.07	4	3.21	1.94	9.72	0.07	22.5	48.4	146.9	15.5	101.5						366.4	1165.4	14	931.8	65.6		3987.5	139.76	344.9	35.77	126.8	18.06	2.94	8.69	0.93	3.96	0.61	1.64	0.19
Huang et al., 2015	CM10-04-17	12		30.881	86.6732					56.61	1.49	11.92	6.01		0.13	6.13	6.16	1.92	6.94	0.41	24.5	154	343.5	35.7	194.5						438.4	1083.7	15	752.7	50		3564.2	90.25	208.3	28.82	112.4	18.61	2.84	9.21	0.97	4.13	0.66	1.82	0.22
Huang et al., 2015	CM10-04-19	12		30.881	86.6732					61	1.28	13.82	4.2		0.06	3.57	2.95	1.77	10.61	0.03	25.6	85.6	105.9	10.8	65.87						411.8	800.3	8.2	901.4	54.9		3120.5	49.28	190.2	15.09	57.46	8.82	1.22	5.11	0.47	1.97	0.3	0.83	0.11
Huang et al., 2015	CM10-04-20	12		30.881	86.6732	0.720554	-13.56			65.17	0.93	13.41	3.66		0.05	2.94	2.51	2.48	7.68	0.04	24.9	73	117.5	11.9	74.24						403	786.2	9.5	663.8	53.7		2065.1	113.3	210.8	24.05	80.05	10.94	2.09	4.06	0.57	2.62	0.45	1.28	0.17
Huang et al., 2015	CM10-04-21	12		30.881	86.6732					58.17	1.45	12.3	4.85		0.1	6.14	5.69	1.62	7.3	0.26	21.7	151.3	332.8	27.6	121.2						368.1	1112.2	13	789.7	53.3		3605.8	71.42	170.2	24.08	94.58	15.21	2.48	7.69	0.82	3.66	0.57	1.53	0.18
Huang et al., 2015	CM10-04-22	12		30.881	86.6732					59.1	1.62	11.19	5.04		0.06	6.35	4.13	1.27	8.97	0.11	18.1	123.3	366.4	19.9	194.3						590.9	507.4	12.1	925.1	45.1		3695.2	67.98	174.2	25.2	101.3	16.26	2.42	8.05	0.83	3.56	0.53	1.47	0.17
Huang et al., 2015	CM10-04-24	12		30.881	86.6732					61.15	1.21	14.17	4.3		0.06	3.61	2.53	2.04	10.29	0.07	23.9	78.4	101.8	13.1	75.7						457.9	819.4	8.8	1097.4	75.5		2969.6	66.38	148.5	18.65	67.05	9.76	1.41	5.08	0.52	2.43	0.34	0.96	0.11
Huang et al., 2015	CM10-04-26	12		30.881	86.6732	0.72073	-12.12			63.89	0.94	13.67	3.82		0.06	3.13	2.6	2.06	8.39	0.05	17.7	72.4	116.7	12.7	74.51						450.8	997.4	12.3	773.5	59.1		2427.9	114.35	211.5	23.82	78.32	10.79	1.89	4.88	0.56	2.67	0.44	1.27	0.16
Huang et al., 2015	CM10-04-27	12		30.881	86.6732					58.52	1.63	11.72	5.25		0.06	6.5	4.13	1.18	9.27	0.09	18.5	122.8	350.7	23	217.3						516.9	565.3	12.3	929.6	43.8		3334.3	86.66	200.8	28.06	108.9	16.26	2.28	6.55	0.73	3.21	0.48	1.35	0.16
Huang et al., 2015	CM10-04-28	12		30.881	86.6732					59.15	1.65	12.02	5.11		0.06	6.03	3.9	1.27	9.31	0.06	16.2	123.2	364.5	19.2	187						488.4	491.4	12.7	964	46.8		3394.7	81.67	198	27.75	113.1	17.27	2.52	7.6	0.8	3.56	0.54	1.51	0.19
Huang et al., 2015	CM10-04-29	12		30.881	86.6732					58.6	1.63	11.48	5.34		0.06	6.11	4.2	1.3	9.36	0.13	18.5	116.1	359	22.4	231.4						629.6	528.4	14.3	1009.5	48.7		3334.9	92.31	221.3	29.43	117.1	18.41	2.67	7.34	0.82	3.56	0.55	1.58	0.19
Huang et al., 2015	CQQ4-04-01	16		30.8	84.4167					55.7	1.55	11.37	6.98		0.09	10.11	5.01	1.94	6.5	0.14	21.9	154.7	728.9	18.4	305						381.3	1152.4	14.7	685.5	32.2		3737.1	26.05	86.04	16.11	80.11	19.07	3.46	10.07	1.04	4.08	0.59	1.48	0.19
Huang et al., 2015	CQQ4-04-02	16.28	0.07	30.8	84.4167	0.721971	-16.17			54.32	1.52	11.57	7.27		0.09	10.36	5.33	1.71	6.51	0.33	20.7	144.1	704.8	16.1	370.5						368.8	1167.2	21	688.6	33		3907.6	53.66	153.7	25.18	127.9	26.83	4.61	14.63	1.48	5.23	0.8	1.98	0.24
Huang et al., 2015	CQQ4-04-03	16		30.8	84.4167	0.721935	-15.54			54.83	1.52	11.45	7.2		0.09	10.24	5.12	1.58	6.74	0.19	21	143.1	677.4	16.8	310.2						327.1	1165.7	17.4	660.7	31		3660.7	34.79	111.3	20.12	100.8	22.7	3.94	12.03	1.23	4.82	0.71	1.8	0.21
Huang et al., 2015	CQQ4-04-04	16		30.8	84.4167					53.82	1.47	11.31	7.3		0.1	10.75	5.04	1.62	6.84	0.55	18	153.7	582.6	28.9	389.7						495	1045.3	20.6	674.6	31		3483.6	71.78	199.2	32.88	154.6	30.74	4.76	16.41	1.59	5.94	0.85	2.25	0.24
Huang et al., 2015	CQQ4-04-05	16		30.8	84.4167					56	1.46	11.26	6.27		0.08	10.66	4.14	1.38	8.23	0.42	18.1	125.1	592.8	14	382.3						635.9	684.2	17.5	685	28.8		3887.8	54.7	153	25.56	121.9	26.11	3.68	13.78	1.31	4.75	0.68	1.71	0.19
Huang et al., 2015	CQQ4-04-06	16		30.8	84.4167					55.64	1.53	11.28	6.24		0.08	10.21	4	1.38	8.27	0.24	18.1	132.5	593.5	12.8	377.3						662	671.5	14.8	798.8	33.9		3994.7	36.82	107.8	18.47	94.41	19.82	3.02	10.49	1.05	3.8	0.57	1.38	0.16
Huang et al., 2015	CQQ4-04-09	16		30.8	84.4167					56.89	1.52	11.45	5.71		0.07	9.33	3.92	1.38	8.42	0.12	18.2	122.7	584	6.6	336.5						701.9	564.8	12.8	752.9	31.9		4056	21.39	72.95	13.16	69.87	15.67	2.56	8.6	0.9	3.33	0.51	1.22	0.15
Huang et al., 2015	CQQ4-04-10	16		30.8	84.4167					55.2	1.52	11.33	6.9		0.09	10.38	4.54	1.64	7.03	0.11	19.6	144.7	711.8	17.4	381.1						434	1115	17.1	689.9	31.4		3609.3	23.45	86.47	16.07	86.93	20.21	3.6	10.71	1.15	4.39	0.68	1.62	0.2
Huang et al., 2017b	CQ0615	115.3	1.1	30.9388	85.1045	0.7049	-7.6	-6.66		71.82	0.28	14.05	2.97		0.15	0.83	2.23	1.91	2.62	0.07	7.85	22.82	7.88	4.41	2.09	55.18		45.52	14.58		129.78	106.78	43.03	144.89	9.35	5.1	734.95	56.45	97.09	10.02	34.15	6.41	1.45	6.16	1	6.57	1.51	4.26	0.63
Huang et al., 2017b	CQ0616	115		30.9388	85.1045					59.68	1.23	17.06	10.23		0.08	0.93	1.7	3.33	3.02	0.32	22.08	137.23	11.5	18.33	3.41	3.02		42.82	15.05		166.16	233.78	24.74	86.97	3.91	7.18	1331.3	16.61	35.73	4.53	19.55	4.6	1.81	4.76	0.72	4.52	0.94	2.56	0.35
Huang et al., 2017b	CQ0618	115		30.9388	85.1045					55.22	1.16	17.83	6.17		0.18	1.11	5.86	6.66	0.47	0.21	19.43	58.02	25.15	14.18	5.58	5.22		91.57	12.1		21.99	244.7	27.31	85.92	3.56	1.78	150.14	12.37	30.14	4.1	17.76	4.55	1.64	4.85	0.77	4.79	0.97	2.69	0.36
Huang et al., 2017b	CQ0619	115		30.9388	85.1045	0.71028	-4.4			55.81	1.19	18.54	7.84		0.16	0.87	4.5	6.65	0.77	0.43	18.37	97.7	12.07	12.1	3.48	5.08		78.24	14.31		34.11	389.7	31.62	123.73	5.52	2.74	261.69	14.95	36.58	4.92	21.45	5.28	1.69	5.47	0.86	5.32	1.16	3.15	0.45
Huang et al., 2017b	CQ0620	115		30.9388	85.1045	0.70906	-9			73.23	0.45	12.64	2.21		0.08	0.46	2.59	3.95	1.15	0.11	8.87	48.81	12.51	6.74	5.14	7.53		29.24	11.51		59.15	134.27	31.2	120.6	5.79	3.3	265.84	23.16	47.52	5.94	23.33	5.34	1.86	5	0.8	5.08	1.1	3.11	0.45
Huang et al., 2017b	CQ0621	115		30.9388	85.1045					70.92	0.61	15.24	3.97		0.07	0.97	0.56	3.89	1.68	0.11	11.03	38.79	26.6	7.15	11.55	9.93		74.13	14.19		85.49	104.44	28.72	179.98	9.06	5.29	271.91	27.22	58.75	5.95	21.8	4.65	1.34	4.38	0.73	4.8	1.07	3.2	0.49
Huang et al., 2017b	CQ0622	115		30.9388	85.1045	0.71057	-6			72.86	0.31	11.96	2.25		0.1	0.32	3.37	4.52	0.6	0.11	7.78	66.42	46	6.43	11.06	2.47		38.31	11.42		117.44	56.02	21.83	116.77	8.39	8.69	319.27	28.17	56.91	5.89	21.47	4.19	0.94	3.84	0.57	3.59	0.77	2.28	0.34
Huang et al., 2017b	CQ0623	115		30.9388	85.1045					65.85	0.45	15.07	4.3		0.11	0.54	3.15	3.82	2.96	0.14	11.77	35.78	9.03	3.96	1.78	3.14		43.57	15.95		79.89	99.14	32.49	166.4	9.93	2.43	174.89	26.49	57.11	6.23	23.74	5.34	1.12	5.24	0.85	5.54	1.2	3.4	0.51
Huang et al., 2017b	CQ0624	115		30.9388	85.1045					78.76	0.3	9.88	2.89		0.05	0.86	1.24	1.46	2.09	0.06
Huang et al., 2017b	CQ0625	115		30.9388	85.1045	0.70299	-2.2			68.38	0.37	14	3.87		0.09	0.52	2.66	4.4	1.77	0.12
Huang et al., 2017c	13DJ-04	57.1	1.7	29.4264	87.6885	0.705145	0.9			51.15	1.1	18.06	10.53		0.22	4.89	7.69	3.56	1.66	0.23	20.2	219.4	24.2	25.59	10.86				20.31		44.12	699.5	14.6	87.63	4.26		535.1	11.9	27.49	3.71	16.29	3.67	1.16	3.38	0.5	2.96	0.59	1.57	0.22
Huang et al., 2017c	13DJ-05	57.4	1.1	29.4264	87.6885	0.705151	0.95	6.98		53.42	1.02	17.61	9.74		0.21	4.31	7.76	3.72	1.24	0.26	18.18	199.3	91.86	24.74	25.13				19.98		28.47	723.5	15.43	112.2	4.68		516.9	13.36	29.94	4.02	17.36	3.81	1.26	3.5	0.52	3.04	0.61	1.64	0.23
Huang et al., 2017c	13DJ-06	57		29.4264	87.6885	0.705157	0.94			52.62	1.05	17.19	9.71		0.25	4.83	8.08	3.24	1.07	0.28	17.52	182.7	32.61	24.51	42.37				18.79		31.44	764.5	15.39	103.2	4.47		215.6	13.27	29.66	4.13	17.81	3.96	1.27	3.6	0.54	3.15	0.63	1.67	0.24
Huang et al., 2017c	15DJ-01	57		29.4264	87.6885	0.705114	0.84			52.23	1.02	17.94	9.81		0.2	4.45	8.38	3.65	1.41	0.28	18.44	191.9	13.84	19.14	8.82				20.7		38.78	657.8	16.55	98.32	4.32		376.1	13.95	30.41	4.04	17.86	3.9	1.2	3.63	0.57	3.17	0.63	1.69	0.24
Huang et al., 2017c	15DJ-02	57		29.4264	87.6885	0.70515	1.47			52.56	1.01	17.97	10.23		0.2	4.38	8.7	3.13	1.19	0.28	18.25	197.4	71.91	26.17	10.01				20.83		26.02	745	16.64	101.9	4.56		277.6	14.37	31.56	4.15	18.01	3.93	1.29	3.67	0.58	3.21	0.64	1.74	0.24
Huang et al., 2017c	15DJ-04	57		29.4264	87.6885	0.705147	1.62			52.45	1.08	17.47	9.91		0.21	4.01	10.03	3.65	0.19	0.25	23.48	223.7	22.19	28.92	12.8				22.95		13.22	1054.6	17.98	100.3	4.4		86.9	13.71	30.25	4.07	18.34	4.02	1.4	3.85	0.61	3.38	0.68	1.8	0.25
Huang et al., 2017c	15DJ-05	57		29.4264	87.6885	0.704932	-0.17			55.78	0.67	18.31	7.95		0.18	2.73	6.31	4.23	1.63	0.43	5.59	97.8	17.44	16.95	2.5				22.06		16.89	876	11.38	105.3	4.86		553.1	20.59	48.69	6.16	25.31	4.82	1.43	3.76	0.52	2.64	0.5	1.34	0.19
Huang et al., 2017c	15DJ-07	55.9	0.9	29.4264	87.6885	0.705002	1.49	1.34		50.7	1.12	17.67	9.87		0.19	5.84	7.83	3.63	1.3	0.25	23.87	249.5	34.02	30.52	19.99				19.1		39.68	660.3	15.78	80.01	3.75		489.5	10.52	24.81	3.53	16.05	3.63	1.2	3.5	0.53	3.17	0.63	1.66	0.24
Huang et al., 2017c	13DJ-02	57.3	0.4	29.4493	87.6858	0.704778	1.83			66.94	0.37	15.67	4.23		0.14	1.2	2.97	4.38	3.45	0.12	8.94	52.83	108	7.14	5.97				17.51		128.2	268.9	18.08	93.69	10.06		423.3	24.19	46.77	5.09	17.88	3.48	0.63	3.35	0.51	3.14	0.67	1.93	0.3
Huang et al., 2017c	13DJ-03	56	0.6	29.4493	87.6858	0.704987	1.85	7.97		69.1	0.35	15.11	4.11		0.18	1.02	3.1	4.52	1.93	0.1	7	46.08	180.4	6.34	6.15				16.67		58.91	306.1	16.97	97.38	9.85		372.8	29.22	56.22	5.88	19.47	3.42	0.59	3.27	0.47	2.91	0.62	1.79	0.28
Huang et al., 2017c	15DJ-03	57		29.4493	87.6858	0.704762	2.41			68.66	0.34	14.97	3.63		0.13	1.04	2.73	4.07	3.56	0.09	7.37	45.49	7.15	6.47	3.35				16.49		126.9	255.3	15.86	96.28	8.8		347.7	23.59	43.5	4.64	15.92	2.94	0.55	2.76	0.45	2.68	0.55	1.63	0.26
Huang et al., 2017c	13DJ-07	57.2	0.7	29.4215	87.6351	0.704612	1.73	6.27		72.54	0.18	14.02	2.63		0.15	0.38	1.59	4.11	4.1	0.05	4.76	16.05	86.07	3.06	4.37				15.6		134.6	148.7	19.2	69.43	11.69		360.7	17.76	34.39	4.09	14.36	3.12	0.37	2.93	0.5	3.23	0.7	2.08	0.34
Huang et al., 2017c	13DJ-08	57.8	1	29.4215	87.6351	0.704636	1.75			72.35	0.12	13.93	2.3		0.15	0.24	1.19	3.95	4.62	0.04	3.78	13.88	74.38	2.43	3.94				14.68		136.4	150.2	10.39	68.78	5.34		486.7	18.98	35.17	3.86	12.37	2.2	0.38	2.1	0.3	1.84	0.38	1.12	0.18
Huang et al., 2017c	15DJ-09	56.7	0.4	29.3913	87.5377	0.705485	0.09	8.34		59.92	0.82	16.56	7.82		0.22	1.79	4.8	4.62	2.23	0.28	7.71	39.6	18.88	8.81	1.84				19.84		69.7	524.5	16.06	118.3	5.12		362.1	15.67	33.96	4.41	18.79	4.07	1.34	3.73	0.59	3.25	0.62	1.63	0.23
Huang et al., 2017c	15DJ-06-1	57		29.3913	87.5377	0.704874	2.02			62.16	0.87	15.89	7.7		0.18	2.57	1.67	4.09	2.54	0.22	14.57	125.1	48.24	16.43	6.5				20.64		121.4	276.2	28.85	121.7	18.52		267.2	25.37	52.99	6.11	23	4.75	0.69	4.47	0.77	4.67	0.98	2.9	0.46
Huang et al., 2017c	15DJ-06-2	57		29.3913	87.5377	0.704957	2.37			55.97	0.9	17.73	8.37		0.25	3.02	4.64	5.3	2.22	0.26	20.48	144.8	32.73	17.16	9.44				23.73		143.5	265.4	35.27	65.96	21.11		217.2	17.29	42.41	6.12	25.79	6.07	0.75	5.76	0.99	6.25	1.29	3.7	0.6
Huang, C., et al., 2017	LZH1101a	17.8	0.1	28.3695	90.919	0.726561	-12.2	-9.94		73.77	0.07	14.45	0.79		0.01	0.09	0.81	3.99	4.93	0.05	1.37	1.44	0.65	0.34	0.32	1.24		60.1	27.7		430	72	5.97	31.4	8.61	16.7	187	9.86	20	2.36	9.1	2.71	0.56	2.57	0.36	1.37	0.17	0.38	0.054
Huang, C., et al., 2017	LZH1102a	18		28.3695	90.919					74.62	0.04	14.62	0.66		0.01	0.11	1.1	4.37	3.9	0.08	1.04	1.63	0.43	0.26	0.28	5.47		29	22.1		280	63.5	8.34	24.7	4.99	16.7	124	5.8	11.9	1.48	5.56	2.23	0.37	2.44	0.44	1.92	0.26	0.6	0.073
Huang, C., et al., 2017	LZH1103a	18		28.3695	90.919	0.727816	-12.7			73.66	0.08	15.16	0.98		0.01	0.13	1	4.25	3.86	0.12	1.54	0.98	0.42	0.45	0.26	0.88		66.7	30.8		350	67.9	7.55	43.3	8.9	11.7	111	12.2	26.4	3.06	11.8	3.7	0.53	3.35	0.47	1.85	0.25	0.5	0.062
Huang, C., et al., 2017	LZH1107a	18		28.3655	90.9221	0.727969	-12.7			74.14	0.07	15.09	0.8		0.01	0.11	0.73	3.87	4.79	0.1	1.69	1.2	1.23	0.35	0.57	2.02		45	29.7		385	70.6	6.75	28	9.52	39.1	129	11.4	23	2.7	10.1	2.96	0.54	2.74	0.38	1.54	0.19	0.48	0.066
Huang, C., et al., 2017	LZH1111a	18		28.3633	90.9292					72.93	0.06	15.1	0.64		0.01	0.13	1.05	4.51	4.12	0.08	1.27	0.69	0.58	0.34	0.35	0.94		45.7	28.3		350	71.3	5.43	33.8	4.54	10.7	116	9.99	21.7	2.46	9.17	2.73	0.56	2.29	0.34	1.32	0.17	0.38	0.043
Huang, C., et al., 2017	LZH1113a	18		28.35	90.9461					72.75	0.09	15.48	0.84		0.02	0.13	1.02	3.88	4.92	0.14	1.96	1.16	0.63	0.42	0.36	0.79		47.9	32.7		410	83.9	7.91	37.9	11.4	56.4	162	14	28.9	3.47	13	3.77	0.63	3.43	0.45	1.89	0.26	0.52	0.069
Huang, C., et al., 2017	LZH1114	15		28.2857	90.9704	0.762202	-11.8			73.67	0.03	14.76	0.34		0.02	0.08	1.08	2.88	5.81	0.06	1.34	0.73	1.09	0.23	0.32	0.81		7.72	14.9		237	111	15.1	23.9	2.7	7.95	394	9.37	18.8	2.24	8.53	2.52	0.88	2.78	0.47	2.75	0.45	1.17	0.17
Huang, C., et al., 2017	LZH1115	15.1	0.1	28.2799	90.9709	0.740501	-12.9	-12.1		71.88	0.11	14.74	0.66		0.01	0.2	0.81	4.45	5.5	0.15	2.13	1.58	0.58	0.54	0.27	2.31		15.4	26.1		487	63.1	10.4	51	10.5	22.7	255	17.4	36	4.35	15.7	4.32	0.47	3.24	0.44	2.05	0.34	0.85	0.11
Huang, C., et al., 2017	LZH1116	15		28.2799	90.9709					73.48	0.06	15.65	1		0.07	0.12	0.59	4.09	3.95	0.14	2.31	0.97	0.31	0.5	0.56	2.27		47.4	36.7		459	12.4	9.71	33.2	15.1	13.4	41.5	6.66	14.5	1.74	6.61	2.23	0.12	2.03	0.33	1.85	0.32	0.86	0.12
Huang, C., et al., 2017	LZH1125	15		28.3703	90.7549					72.52	0.21	15.41	1.44		0.04	0.49	1.47	3.75	3.99	0.09	3.24	21.3	13.3	2.45	5.14	3.26		64.5	23.1		267	207	9.9	65	8.31	23.6	437	21.8	43.5	5.01	19.6	4.05	0.8	3.17	0.41	1.88	0.31	0.85	0.11
Huang, C., et al., 2017	LZH1126	15		28.3707	90.7376	0.73849	-11.5			72.88	0.21	15.13	1.55		0.03	0.56	1.61	3.78	3.95	0.08	3.55	22.1	15.2	2.7	6.32	2.3		54.3	22.2		221	212	10.8	64.6	7.54	13.3	513	21.9	44.6	5.17	20	4.25	0.84	3.36	0.44	2.12	0.37	0.93	0.13
Huang, C., et al., 2017	LZH1127	15		28.3707	90.7376					71.92	0.2	14.9	1.54		0.04	0.49	1.43	3.48	4.36	0.09	3.81	16.4	12.7	2.56	4.93	1.9		56.9	23.3		273	165	11.5	60.2	9.52	19.6	460	19.5	38.8	4.61	17.7	4.04	0.72	3.22	0.47	2.35	0.36	0.98	0.14
Huang, C., et al., 2017	LZH1128	12	0.1	28.3665	90.7183	0.726006	-13.3	-13.31		73.03	0.14	14.21	1.36		0.04	0.28	0.87	3.45	5.04	0.12	3.39	4.93	2.99	1.12	1.11	1.13		48.4	24		354	107	15.8	64.9	12.6	16.1	274	19.2	39.6	4.76	18	4.52	0.49	3.97	0.62	3.1	0.51	1.2	0.17
Huang, C., et al., 2017	LZH1129	12		28.3665	90.7183					72.98	0.13	14.58	1.21		0.02	0.25	0.85	3.84	4.88	0.13	3.34	5.62	2.84	0.86	0.92	1.01		22.9	25		365	84.4	21.2	64.3	13.3	27	265	17.9	36	4.29	16	4.23	0.59	4	0.7	3.88	0.69	1.79	0.24
Huang, C., et al., 2017	LZH1130	12.2	0.4	28.3665	90.7183			-7.2		70.8	0.33	15.66	2.32		0.03	0.94	2.48	4.03	3.22	0.08	5.25	35.9	31.8	5.02	12.2	1.33		85.4	25.3		245	262	11.7	80.6	12.1	13.7	615	26.4	52.4	6.17	23.6	4.91	0.96	3.97	0.51	2.51	0.39	1.05	0.13
Huang, C., et al., 2017	LZH1131	12		28.3665	90.7183	0.755647	-12.8			73.47	0.11	14.62	1.22		0.04	0.19	0.68	3.54	5.34	0.19	2.65	1.41	0.61	0.64	0.23	0.77		61.7	27.8		452	35.5	17.7	49.3	12	26.8	125	13.5	28.8	3.48	13.5	3.89	0.34	3.74	0.62	3.27	0.57	1.5	0.21
Huang, C., et al., 2017	LZH1133	12		28.3601	90.7016					74.25	0.1	14.66	1.27		0.04	0.22	0.75	3.54	4.48	0.15	3.42	5.76	2.95	1.17	1.29	10.7		59.7	25.4		400	59.4	13.1	44.5	15.1	16.2	164	10.1	20.7	2.5	9.38	2.67	0.31	2.58	0.45	2.43	0.42	1.03	0.16
Huang, F., et al., 2016	11DZ-07	60.2	1.2	29.6833	91.5334					72.66	0.18	13.8	3.24		0.03	0.34	1.75	2.95	4.61	0.04	1.7	37.5	8.5	3.5	2.1				12.9		111.2	224.1	7.9	107.6	3.3		472.7	28.41	48.33	4.52	14.12	2.12	0.54	1.44	0.23	1.22	0.28	0.91	0.15
Huang, F., et al., 2016	11DZ-22	13.2	0.4	29.5417	91.32					65.31	0.66	16.75	3.99		0.05	2.54	2.59	4.36	3.1	0.16	7.4	88.6	81.9	12.5	30.2				20.7		68.1	822.1	7	113.6	3.5		744	23.71	48.09	5.83	23.13	3.96	0.99	2.28	0.33	1.61	0.3	0.79	0.11
Huang, F., et al., 2016	12DZ-12	60.7	2.1	29.5417	91.32			9.24811		56.9	0.9	17.45	8.64		0.16	3.37	6.63	3.44	1.53	0.21	15.8	188.2	13.9	22.6	11.6				18.3		34.9	446.1	19.3	34.8	5.6		323.1	14.66	32.98	4.16	17.72	4.11	1.23	3.81	0.62	3.65	0.75	2.02	0.3
Huang, F., et al., 2016	12DZ-13	60.7	1.5	29.5417	91.32			9.36227		61.38	0.81	16.29	7.3		0.16	2.88	5.47	3.22	1.92	0.16	14.9	141.2	18.3	18	16.2				17.4		54.9	376	20.5	45.2	6.5		438.8	19.31	40.97	5.06	20.57	4.41	1.08	4.01	0.66	3.87	0.79	2.15	0.31
Huang, F., et al., 2016	13DZ-01	16.6	0.5	29.5417	91.32			8.12649		60.84	0.7	16.51	5.92		0.16	2.37	4.14	4.52	2.39	0.26	10.2	136.1	23.8	15.8	16.8				19.5		44.6	1001.4	9.3	80.4	3.4		760.6	16.42	37.3	5.06	20.85	3.87	1.05	3.02	0.35	1.85	0.35	0.92	0.13
Huang, F., et al., 2016	13DZ-07	53.2	1.3	29.5417	91.32					57.93	1.11	20.54	9.51		0.19	0.28	0.56	0.12	1.11	0.28
Huang, F., et al., 2016	13DZ-08	16.7	0.4	29.5417	91.32			8.84458		62.03	0.72	16.65	5.78		0.13	2.27	2.33	4.59	2.8	0.26	10.2	132.6	62.7	15.4	17.3				20		61	929.9	8.9	76.4	3.6		749.5	17.19	39.28	5.26	21.47	3.97	1.06	3	0.35	1.85	0.34	0.88	0.12
Huang, F., et al., 2016	13DZ-12	60.7	1.7	29.5417	91.32			9.62508		60.06	0.71	16.72	7.48		0.18	2.73	5.76	3.57	1.89	0.17	15.2	154.8	25.5	19.4	12.1				17.9		44.3	421.9	17.4	44.7	5.1		394.9	14.14	31.08	4.14	16.91	3.76	1.09	3.61	0.55	3.31	0.67	1.85	0.27
Huang, F., et al., 2016	13DZ-13	60		29.6833	91.5334					74.25	0.09	13.41	1.75		0.1	0.17	1.24	2.8	5.85	0.02	1.3	12.9	67.3	2.4	4.9				10.5		131.2	177.4	4.5	42.4	2.6		361.8	12.35	20.76	2.08	6.34	0.95	0.45	0.93	0.11	0.67	0.15	0.49	0.09
Huang, F., et al., 2016	13DZ-14	60		29.6833	91.5334					75.57	0.1	12.97	1.2		0.05	0.21	0.68	2.75	5.87	0.01	1.5	11.5	21.7	2.7	10.3				10.2		156.9	153.9	5.4	51.6	7.2		531.7	2.9	5.33	0.59	2.13	0.56	0.38	0.6	0.12	0.85	0.2	0.69	0.13
Huang, F., et al., 2017	13DJ-04	57.1	1.7	29.4251	87.6891	0.705145	0.9			51.15	1.1	18.06	10.53		0.22	4.89	7.69	3.56	1.66	0.23	20.2	219.4	24.2	25.59	10.86				20.31		44.12	699.5	14.6	87.63	4.26		535.1	11.9	27.49	3.71	16.29	3.67	1.16	3.38	0.5	2.96	0.59	1.57	0.22
Huang, F., et al., 2017	13DJ-05	57.4	1.1	29.4251	87.6891	0.705151	0.95			53.42	1.02	17.61	9.74		0.21	4.31	7.76	3.72	1.24	0.26	18.18	199.3	91.86	24.74	25.13				19.98		28.47	723.5	15.43	112.2	4.68		516.9	13.36	29.94	4.02	17.36	3.81	1.26	3.5	0.52	3.04	0.61	1.64	0.23
Huang, F., et al., 2017	13DJ-06	57		29.4251	87.6891	0.705157	0.94			52.62	1.05	17.19	9.71		0.25	4.83	8.08	3.24	1.07	0.28	17.52	182.7	32.61	24.51	42.37				18.79		31.44	764.5	15.39	103.2	4.47		215.6	13.27	29.66	4.13	17.81	3.96	1.27	3.6	0.54	3.15	0.63	1.67	0.24
Huang, F., et al., 2017	15DJ-01	57		29.4251	87.6891	0.705114	0.84			52.23	1.02	17.94	9.81		0.2	4.45	8.38	3.65	1.41	0.28	18.44	191.9	13.84	19.14	8.82				20.7		38.78	657.8	16.55	98.32	4.32		376.1	13.95	30.41	4.04	17.86	3.9	1.2	3.63	0.57	3.17	0.63	1.69	0.24
Huang, F., et al., 2017	15DJ-02	57		29.4251	87.6891	0.70515	1.47			52.56	1.01	17.97	10.23		0.2	4.38	8.7	3.13	1.19	0.28	18.25	197.4	71.91	26.17	10.01				20.83		26.02	745	16.64	101.9	4.56		277.6	14.37	31.56	4.15	18.01	3.93	1.29	3.67	0.58	3.21	0.64	1.74	0.24
Huang, F., et al., 2017	15DJ-04	57		29.4251	87.6891	0.705147	1.62			52.45	1.08	17.47	9.91		0.21	4.01	10.03	3.65	0.19	0.25	23.48	223.7	22.19	28.92	12.8				22.95		13.22	1054.6	17.98	100.3	4.4		86.9	13.71	30.25	4.07	18.34	4.02	1.4	3.85	0.61	3.38	0.68	1.8	0.25
Huang, F., et al., 2017	15DJ-05	57		29.4251	87.6891	0.704932	-0.17			55.78	0.67	18.31	7.95		0.18	2.73	6.31	4.23	1.63	0.43	5.59	97.8	17.44	16.95	2.5				22.06		16.89	876	11.38	105.3	4.86		553.1	20.59	48.69	6.16	25.31	4.82	1.43	3.76	0.52	2.64	0.5	1.34	0.19
Huang, F., et al., 2017	15DJ-07	55.9	0.9	29.4251	87.6891	0.705002	1.49			50.7	1.12	17.67	9.87		0.19	5.84	7.83	3.63	1.3	0.25	23.87	249.5	34.02	30.52	19.99				19.1		39.68	660.3	15.78	80.01	3.75		489.5	10.52	24.81	3.53	16.05	3.63	1.2	3.5	0.53	3.17	0.63	1.66	0.24
Huang, F., et al., 2017	13DJ-02	57.3	0.4	29.424	87.6531	0.704778	1.83			66.94	0.37	15.67	4.23		0.14	1.2	2.97	4.38	3.45	0.12	8.94	52.83	108	7.14	5.97				17.51		128.2	268.9	18.08	93.69	10.06		423.3	24.19	46.77	5.09	17.88	3.48	0.63	3.35	0.51	3.14	0.67	1.93	0.3
Huang, F., et al., 2017	13DJ-03	56	0.6	29.424	87.6531	0.704987	1.85			69.1	0.35	15.11	4.11		0.18	1.02	3.1	4.52	1.93	0.1	7	46.08	180.4	6.34	6.15				16.67		58.91	306.1	16.97	97.38	9.85		372.8	29.22	56.22	5.88	19.47	3.42	0.59	3.27	0.47	2.91	0.62	1.79	0.28
Huang, F., et al., 2017	15DJ-03	56	0.6	29.424	87.6531	0.704762	2.41			68.66	0.34	14.97	3.63		0.13	1.04	2.73	4.07	3.56	0.09	7.37	45.49	7.15	6.47	3.35				16.49		126.9	255.3	15.86	96.28	8.8		347.7	23.59	43.5	4.64	15.92	2.94	0.55	2.76	0.45	2.68	0.55	1.63	0.26
Huang, F., et al., 2017	13DJ-07	57.2	0.7	29.4184	87.6307	0.704612	1.73			72.54	0.18	14.02	2.63		0.15	0.38	1.59	4.11	4.1	0.05	4.76	16.05	86.07	3.06	4.37				15.6		134.6	148.7	19.2	69.43	11.69		360.7	17.76	34.39	4.09	14.36	3.12	0.37	2.93	0.5	3.23	0.7	2.08	0.34
Huang, F., et al., 2017	13DJ-08	57.8	1	29.4184	87.6307	0.704636	1.75			72.35	0.12	13.93	2.3		0.15	0.24	1.19	3.95	4.62	0.04	3.78	13.88	74.38	2.43	3.94				14.68		136.4	150.2	10.39	68.78	5.34		486.7	18.98	35.17	3.86	12.37	2.2	0.38	2.1	0.3	1.84	0.38	1.12	0.18
Huang, F., et al., 2017	15DJ-09	56.7	0.4	29.4184	87.6307	0.705485	0.09			59.92	0.82	16.56	7.82		0.22	1.79	4.8	4.62	2.23	0.28	7.71	39.6	18.88	8.81	1.84				19.84		69.7	524.5	16.06	118.3	5.12		362.1	15.67	33.96	4.41	18.79	4.07	1.34	3.73	0.59	3.25	0.62	1.63	0.23
Huang, Q., et al., 2016	BD0059	115.4	1.2	32.6484	82.9977
Huang, Q., et al., 2016	D1048-1	121		32.6537	82.7302	0.704909	-0.76
Huang, Q., et al., 2016	D3305-1	113		32.6586	83.0702					58.95	0.73	16.36	0.85		0.17	2.18	5.72	3.83	3.95	0.36		157	102	20.1	71			44.3		759	180		27.92	166	16.6		524	40.97	74.49	9.3	34.94	7.42	1.94	6.38	0.95	5.31	1.09	2.98	0.47
Huang, Q., et al., 2016	D3307-1	113		32.6586	83.0702					59.5	0.71	16.26	0.88		0.14	2.53	4.99	3.82	3.57	0.33		53	22.9	17.7	5			26.5		980	61.2		28.16	275	15.6		59.2	38.42	71.05	9.05	34.3	7.19	1.92	6.25	0.94	5.08	1.09	2.95	0.46
Huang, Q., et al., 2016	D3605-1	113		32.66	83.1119	0.704468	5.84			59.8	0.71	16.34	0.83		0.14	1.77	5.49	3.83	3.79	0.36		190	38.6	20.3	11			79		844	118		25.45	180	9.8		566	39.31	72.33	8.14	32.24	6.71	1.65	5.83	0.9	4.86	1.04	2.86	0.45
Huang, Q., et al., 2016	D5109-1	115		32.6484	82.9977	0.704754	3.93			65.75	0.53	15.36	0.43		0.07	1.98	1.72	5.44	2.07	0.23		72.9	40.4	23	27.4			68.68		870	60.2		7.35	206.63	11.4		621.42	27.68	48.44	5.08	19.3	3.45	1	2.52	0.35	1.68	0.32	0.77	0.15
Huang, Q., et al., 2016	D5110-1	115		32.6484	82.9977					62.72	0.58	14.85	0.5		0.09	2.77	4.09	5.56	1.62	0.25		93.42	59.4	20	37			74.79		552	54.4		10.45	157.04	13.8		464.52	27.67	50.82	5.94	23.98	4.37	1.24	3.36	0.46	2.33	0.45	1.13	0.21
Huang, Q., et al., 2016	D5140-1	121		32.6537	82.7302					55.02	0.78	17.23	1.24		0.17	3.29	2.87	6.49	1.46	0.34		232.31	58.5	22.4	11.01			144.4		348	30.43		29.06	98.4	11.6		802.27	32.31	52.6	6.82	27.96	6.06	1.67	5.69	0.92	5.03	1.08	2.91	0.53
Huang, Q., et al., 2016	D5212-1	114		32.656	83.1658	0.704458	2.84			63.39	0.53	16.69	0.48		0.08	2.36	3.87	4.67	1.81	0.18		204.01	42.4	21.2	11.9			86.23		1014	104.1		12.5	171.67	8.6		626.02	19	33.4	4.01	16.6	3.28	1.09	2.8	0.41	2.25	0.47	1.2	0.24
Huang, Q., et al., 2016	D5627-2	114		32.656	83.1658					59.9	0.63	16.53	0.81		0.12	3.29	4.9	3.69	1.79	0.27		182.41	42.5	30.6	39			87.79		569	14.3		17.3	218.12	16.1		211.29	32.6	55.8	6.23	24.1	4.74	1.29	3.98	0.59	3.17	0.65	1.69	0.28
Huang, Q., et al., 2016	D5701-1	115		32.6484	82.9977					62.82	0.55	15.82	0.54		0.08	2.39	3.25	4.92	2.36	0.21		86.72	53.6	23.4	35.5			71.78		806	75.9		10.38	191.14	11.5		611.62	35.07	62.48	6.89	25.49	4.41	1.27	3.33	0.48	2.34	0.45	1.15	0.2
Huang, Q., et al., 2016	D5701-2	115		32.6484	82.9977	0.705103	2.38			60.54	0.67	15.05	0.59		0.09	1.59	4.61	4.62	1.13	0.25		107.35	53.3	17	38			65.18		661	58.9		11.55	179.55	12.5		818.05	34.68	61.06	6.84	26.27	4.75	1.4	3.57	0.49	2.48	0.48	1.24	0.22
Huang, Q., et al., 2016	D7005	113		32.66	83.1119					53.38	1.04	16.91	0.84		0.19	3.07	7.14	3.49	3.28	0.49		229	43.3	23.6	9.57			90.1		1054	97.2		33.65	168	14.6		573	41.58	71.71	9.32	37.56	8.06	2.11	6.99	1.04	5.71	1.2	3.06	0.55
Huang, Q., et al., 2016	D7420-1	114		32.656	83.1658					65.71	0.46	16.2	0.43		0.06	0.75	2.94	4.2	2.1	0.14		325.08	137.5	32.4	53.5			63.34		291	49		8.99	56.72	4.5		217.17	22.8	38.9	4.27	16.3	3.12	0.81	2.41	0.34	1.85	0.38	0.98	0.19
Huang, Q., et al., 2016	D8139	121		32.6537	82.7302	0.705177	1.03			55.5	0.94	15.71	1.05		0.07	4.76	7.5	3.43	1.42	0.24		231.88	103	29.4	38.81			158.5		685	47.47		21.1	121.63	9		855.11	21.73	37.4	5.18	22.02	4.41	1.35	4.62	0.67	4.22	0.82	2.11	0.39
Huang, Q., et al., 2016	D8202-2	121		32.6537	82.7302					59.77	0.67	15.39	0.79		0.17	2.35	4.22	3.82	2.9	0.25		165.35	32	18.8	6.2			94.09		969	86		21.74	179.74	10.8		991.96	30.7	56.56	6.83	27.85	5.84	1.77	5.11	0.77	4.12	0.87	2.27	0.38
Huang, Q., et al., 2016	D8802	120.7	1.6	32.6537	82.7302	0.705367	-0.06			59.66	0.83	15.63	0.79		0.08	2.67	3.31	6.13	2.12	0.29		154.33	39.8	20.3	8.29			82		760	58.8		21.1	183.94	13.5		347.62	29.26	27.8	6.45	22.52	5.3	1.31	4.11	0.84	6.3	1.07	3.4	0.48
Huang, Q., et al., 2016	D8803	121		32.6537	82.7302	0.705596	-0.75			55.04	0.9	15.29	0.9		0.09	2.99	4.18	4.46	2.91	0.32		193.32	39.8	18.3	9.65			93.6		540	82.7		21.4	149.95	11.6		604.8	38.67	38.01	7.15	28.13	5.71	1.37	4.21	0.89	6.67	1.15	3.7	0.52
Huang, Q., et al., 2016	ER001	113.6	1.3	32.656	83.1658
Huang, Q., et al., 2016	KJ001	113.3	1.1	32.6586	83.0702					59.5	0.77	15.59	0.84		0.15	2.32	5.56	3.64	3.3	0.27		148	38.4	17.9	12.4			80.4		751	107		28.29	186	8.6		592	34.31	58.03	7.09	27.53	5.56	1.43	4.15	0.84	6.03	1.02	3.25	0.45
Huang, Q., et al., 2016	KJ003	112.7	1.6	32.66	83.1119					57.64	0.7	14.91	1		0.18	3.66	3.16	4.48	3.5	0.24		219	152.5	22.2	49.3			100		678	103		23.48	150	11.4		825.79	31.85	51.27	6.64	33.45	6.73	1.32	4	0.74	4.95	0.86	2.53	0.4
Huang, Q., et al., 2016	PM004-Y004	114		32.656	83.1658	0.704675	2.96			56.42	0.99	16.12	0.48		0.15	2.66	6.57	3.66	3.71	0.52		195.8	40.9	26.6	10.76			63		1101	115.94		30.1	172.32	9.9		671.25	43.9	80.1	9.36	37.3	7.49	2.11	6.75	0.99	5.26	1.16	2.84	0.51
Huang, Y., et al., 2017	ZN01-1001-198.8	51.9	0.7	29.6583	87.475	0.7061	-3.6	-3.68571		72.03	0.41	14.01	1.02	1.04	0.036	0.86	2.15	4.12	3.06	0.14	8.25	27.3	3.56	2.97	1.55				18.1		100	174	26.4	206	10.1	13	653	43.4	71.8	9.76	35.5	6.54	1.22	5.46	0.88	5.18	1	2.62	0.4
Huang, Y., et al., 2017	ZN02	52		29.6583	87.475	0.7063	-5.2			73.23	0.27	13.27	0.86	0.67	0.025	0.41	0.95	3.4	5.52	0.073	10.7	21.7	4.1	2.79	3.52				17.9		247	173	23.5	163	9.88	12.3	846	50.2	78.7	10.1	35.8	6.58	1.19	5.14	0.78	4.67	0.91	2.41	0.37
Huang, Y., et al., 2017	ZN03	52		29.6583	87.475	0.7046				73.3	0.24	13.24	1.51	0.85	0.075	0.17	0.5	3.2	4.52	0.066	8.04	17.3	2.46	7.68	1.57				19.9		288	81.2	27.6	200	10.9	25.4	799	46.2	75.5	9.86	36.4	6.89	1.26	5.58	0.9	5.48	1.07	2.84	0.43
Huang, Y., et al., 2017	ZN04	52		29.6583	87.475	0.7046	-4.4			74.99	0.23	12.48	1.06	0.44	0.023	0.13	0.79	2.77	5.48	0.06	4.64	17.2	6.3	1.6	3.46				16.7		303	41.2	24.8	186	9.67	23.1	870	40.4	66.4	8.72	31.2	6.01	1.24	4.89	0.77	4.64	0.94	2.55	0.38
Huang, Y., et al., 2017	ZN05-806-216	14.1	0.3	29.6583	87.475	0.7074	-6.4	-3.74		71.35	0.44	14.42	0.72	0.84	0.013	1.32	1.16	3.42	5.43	0.13	9.58	60.6	18.2	6.19	13.3				23.7		266	388	8.58	122	8.78	18.4	615	25.3	42	5.94	22	3.78	0.9	2.57	0.36	1.82	0.32	0.83	0.12
Huang, Y., et al., 2017	ZN06	14		29.6583	87.475	0.7071	-6.1			71.57	0.42	13.98	0.94	0.96	0.012	1.2	1.51	3.49	4.17	0.15	6.85	54.9	21.3	7.47	17.7				24.1		202	380	9.06	78.2	7.98	20.4	565	28.8	47.2	6.44	23	3.82	0.9	2.73	0.36	1.82	0.33	0.89	0.13
Huang, Y., et al., 2017	ZN07	14		29.6583	87.475	0.7076	-7.3			71.67	0.31	14.47	0.69	0.67	0.013	0.76	1.18	3.54	4.9	0.1	2.66	37.1	13.4	4.87	8.36				26.2		234	288	10.8	116	10.5	16.6	602	27.3	44.5	6.09	21.8	3.81	0.78	2.78	0.39	2.11	0.38	1.03	0.16
Huang, Y., et al., 2017	ZN10	14		29.6583	87.475	0.7072	-6.6			68.92	0.44	14.92	1.34	1.28	0.035	1.13	2.47	4.08	3.89	0.16	7.99	61.8	28.2	8.84	16.8				30		186	622	7.8	138	8.24	15.5	931	31.6	52.8	7.24	26.4	4.29	0.92	2.84	0.35	1.66	0.28	0.76	0.11
Huang, Y., et al., 2017	ZN11-ZN009	16.2	0.3	29.6583	87.475	0.7076	-7	-4.26111		64.72	0.7	16.69	1.86	1.92	0.038	2.45	2.58	3.92	3.43	0.24	11.6	116	45.3	16.6	25.8				31.6		209	668	13.5	168	8.89	32.6	694	31.4	54.1	7.86	29.4	5.2	1.19	3.78	0.53	2.75	0.5	1.31	0.19
Huang, Y., et al., 2017	ZN12	16		29.6583	87.475	0.7078	-7.1			64.98	0.67	16	2.71	1.51	0.058	2.44	2.05	3.57	3.64	0.21	12.1	123	51	21.7	31				32.7		256	543	12.3	191	8.83	35.2	616	37.5	58.5	7.94	29	5.06	1.1	3.54	0.47	2.57	0.47	1.18	0.16
Huang, Y., et al., 2017	ZN13	16		29.6583	87.475	0.7077	-7.1			64.32	0.67	16.08	2.08	1.82	0.062	2.29	2.21	3.8	3.39	0.21	11.4	121	47.5	20.6	31.3				34.1		141	475	12.8	181	9.05	41.5	778	24.8	43.9	6.62	26.1	4.99	1.19	3.45	0.49	2.71	0.49	1.23	0.17
Huang, Y., et al., 2017	ZN14	16		29.6583	87.475	0.7076	-6.8			65.74	0.6	16.54	2.74	0.91	0.038	1.86	2.52	4.03	3.32	0.2	12.4	112	19.8	17.1	19.6				35.1		210	778	12.7	176	9.86	21.2	821	36.9	59.9	8.3	30.2	5.1	1.19	3.63	0.49	2.53	0.46	1.2	0.17
Huang, Y., et al., 2017	ZN8-2104-203.9	14	0.2	29.6583	87.475	0.7072	-6.4	-1.18889		68.59	0.49	15.62	1.68	0.97	0.021	1.48	1.74	4.21	3.55	0.17	8.67	74.1	65.6	9.23	36.4				27.7		117	418	10.5	143	8.45	17.3	661	34.6	56.4	7.63	28	4.88	1.09	3.27	0.42	2.19	0.39	0.98	0.14
Huang, Y., et al., 2017	ZN9-806-292.7	14.1	0.3	29.6583	87.475	0.7072	-6.1	-2.50769		68.62	0.48	15.27	2.11	0.94	0.021	1.34	1.55	4.17	3.59	0.16	7.95	70.6	25.3	9.34	17.5				29.6		138	443	10.3	155	8.79	17.6	648	41.8	67.1	8.89	31.4	5.27	1.11	3.63	0.46	2.27	0.39	0.99	0.14
Jagoutz et al., 2009	BO-02-13	62.1	4.9	35.0561	72.5842					70.8	0.5	14.8	4.8		0.1	0.9	3.9	4.3	0.7	0.1	18.9	63.1	84.3	7.1	22.5	49.7		50.1			8.1	180	19.6	210	2.25	0.239	137	7.4	16.1	2.05	10.7	2.44	1.09	2.57	0.505	3.19	0.72	1.98	0.323
Jagoutz et al., 2009	BR-02-19	75.1	4.5	35.9353	72.5989					69.1	0.4	16.5	3.7		0.1	0.9	4.1	4.2	1.2	0.2	5.98	52.2	117	5.88	20.8	43		61.5			25.2	332	19.7	117	4.95	0.67	251	7.6	14.9	1.84	8.6	2.57	0.81	3.09	0.518	3.37	0.713	1.8	0.283
Jagoutz et al., 2009	C 226			35.1572	74.5858					59.13	0.99	18.43	8.37		0.12	3.3	4.63	1.44	3.4	0.13	20	143	117	20.5	58	29.3		104			123	316	38.3	248	11.1	0.981	494	49.2	91.6	10.3	38	7.52	1.79	6.5	1.14	6.54	1.33	3.62	0.589
Jagoutz et al., 2009	C 227			35.1572	74.5858					70.81	0.03	15.67	1.49		0.07	0.45	3.35	1.92	5.09	0.04	1			1.12							108	380	10	48		0.342	624	12.3	21	2.33	8.26	1.48	1.49	1.51	0.275	1.63	0.3	0.72	0.105
Jagoutz et al., 2009	C 235			35.0878	74.5847					55.18	0.39	23.75	4.43		0.11	1.92	8.36	5.5	0.13	0.06	34	229	61	43.1	54.1	203		93.8			1.83	410	8.04	15.3	0.788		94.5	2.84	5.38	0.689	3.21	0.996	0.639	1.15	0.222	1.36	0.298	0.858	0.147
Jagoutz et al., 2009	C 71			35.1047	74.585					48.33	1.76	15.3	11.06		0.2	6.94	10.63	3.29	0.14	0.16	40	264	230	35.1	140	79.4		81.3				185	31.1	102	5.23		18.8	5.97	14.6	2.23	11.1	3.69	1.51	4.66	0.891	5.37	1.11	3.04	0.475
Jagoutz et al., 2009	C-01-75	79.34	0.34	35.1389	74.5856					70.45	0.23	16.02	2.29		0.05	1.07	4	4.56	0.78	0.05	5	21	24.1	4.58							11.07	431	1.92	83	1.2	0.223	316	8.62	14.3	1.46	4.7	0.7	0.54	0.44	0.064	0.33	0.064	0.203	0.031
Jagoutz et al., 2009	C-01-77	67.4	5.8	35.1592	74.5858					75.7	0.2	12.4	1.8		0	0.4	1.5	3.44	3.77	0.04	2	10.7		1.79							83.5	97	11.61	123	3.17	1.04	465	19.2	33.6	3.55	12.35	2.49	0.408	2.02	0.355	1.991	0.413	1.1	0.178
Jagoutz et al., 2009	C72			35.0878	74.5847					52.09	0.85	18.68	9.55		0.2	4.77	9.7	3.44	0.34	0.14	21	63	234	59.7	69.6	21		55.2			1.34	330	2.69	8.93	0.431		30	0.582	1.28	0.199	0.952	0.33	0.214	0.406	0.079	0.497	0.101	0.269	0.042
Jagoutz et al., 2009	CO3-67			35.0256	74.5836					72.64	0.09	15.45	0.91		0.03	0.25	2.78	4.78	1.79	0.02	1.44	9.2	0.3	2.62	5.9	2.01		15.5			12.2	382	1.64	55.6	0.553	0.112	426	4.7	11.6	0.85	2.87	0.395	0.178	0.512	0.05	0.199	0.076	0.297
Jagoutz et al., 2009	DR-02-18	42.1	3.7	35.8539	71.5975					56.9	0.7	18.3	7.8		0.1	3	6.6	3.2	2.7	0.2	16.6	166	118	19	15.4	76.6		65.5			60.3	396	14.4	105	3.96	1.78	489	17.7	34.3	3.87	16.5	3.28	0.99	2.7	0.47	2.67	0.51	1.35	0.211
Jagoutz et al., 2009	MN-02-04	72.3	5.1	35.7594	72.5958					70.7	0.2	15.1	3.3		0.1	0.5	2.9	3.6	3.2	0.1	9.46	36.8	129	3.55	12.1	17.8		47.2			80	156	34.5	160	8.2	2.72	309	26.2	52	6.1	25.2	5.57	1.21	5.04	1.02	5.67	1.21	3.51	0.49
Jagoutz et al., 2009	MR-02-03	70.3	5	35.5592	72.5925					73.3	0.3	14.5	2.3		0.1	0.2	1.4	5.4	2.7	0.1	7.94	20.1	95	1.23	29	21.9		42.3			49.1	138	30.4	156	6	0.361	262	13.7	27	3.35	14.6	3.88	1	3.78	0.83	4.97	1.16	3.45	0.493
Jagoutz et al., 2009	PK-02-15			35.0558	72.5842					50.62	0.91	19.38	11.51		0.17	4.85	8.21	2.96	0.49	0.11	15.9	233.9	135	33.2	34.5	38.4		72.7			6.21	692	11.9	17	1.02	0.62	79	3.9	8.8	1.22	5.9	1.73	0.67	1.92	0.326	2.17	0.445	1.24	0.191
Jagoutz et al., 2009	RB-02-16	57.3	5.3	35.2092	72.5867					69.5	0.4	16.5	2.3		0	0.7	2.5	3.7	4.59	0.1	3.69	52	102	5.12	11.6	29.3		57.7			143	320	11.6	100	11.3	6.18	452	20	39.4	4.5	19.1	4.44	0.767	3.6	0.444	2.72	0.484	1.2	0.137
Jagoutz et al., 2009	SL-02-11			35.0214	72.5836					65.1	0.54	15.69	4.85		0.07	2.29	4.15	2.92	3.4	0.12	12.5	111.2	149	10.1	39.9	33.6		35.6			69	226	19.9	145	4.68	2.23	368	12.8	27.2	3.4	14.6	3.19	0.71	3.16	0.503	3.29	0.745	2.02	0.287
Jain and Singh, 2008	R7-17	75.7	1	34.0248	78.175
Jain and Singh, 2008	SY25-65	60	10	34.0325	78.2055
Jain and Singh, 2008	SY26-66	60.4	1.1	34.0325	78.2055
Jain and Singh, 2008	SY44-144	49	4	34.1562	77.9572
Jain and Singh, 2008	SY46-122	20.8	0.4	34.1361	78.1112
Ji et al., 2009	06FW101	64.7	1.1	29.6867	91.1117			7.9
Ji et al., 2009	06FW104	64.4	0.9	29.6753	91.0756			6.9
Ji et al., 2009	06FW105	55.2	1.5	29.7589	90.7756			6
Ji et al., 2009	06FW108	56.8	0.7	29.7589	90.7756			7.7
Ji et al., 2009	06FW110	54.3	0.9	29.7375	90.8331			7.7
Ji et al., 2009	06FW111	50.6	0.7	29.4433	90.9564			11.1
Ji et al., 2009	06FW112	53.4	1	29.4906	90.9611			10.6
Ji et al., 2009	06FW114	86.4	1.6	29.5308	90.9931			11.5
Ji et al., 2009	06FW118	51	0.7	29.4992	90.9386			10.6
Ji et al., 2009	06FW119	51.2	0.7	29.4992	90.9386			11.1
Ji et al., 2009	06FW120	50.3	0.6	29.4992	90.9386			10.9
Ji et al., 2009	06FW121	51.1	0.7	29.4992	90.9386			11
Ji et al., 2009	06FW123	17	0.9	29.5217	90.8106			5.8
Ji et al., 2009	06FW124	15.3	0.4	29.5217	90.8106			6.9
Ji et al., 2009	06FW125	17.7	0.6	29.5172	90.8247			6.4
Ji et al., 2009	06FW126	55.3	1	29.4817	90.8739			6.4
Ji et al., 2009	06FW127	49.5	0.6	29.4817	90.8739			7.4
Ji et al., 2009	06FW128	49.9	1	29.4817	90.8739			9.4
Ji et al., 2009	06FW129	52.9	0.7	29.4639	90.8967			6.2
Ji et al., 2009	06FW131	44	0.8	29.4078	90.9058			2.7
Ji et al., 2009	06FW133	47.1	1	29.3336	90.8656			0.9
Ji et al., 2009	06FW134	41.9	0.6	29.3606	90.8756			2.3
Ji et al., 2009	06FW139	41.5	0.7	29.3831	90.7156			0.6
Ji et al., 2009	06FW140	43.7	0.9	29.4725	90.7156			7
Ji et al., 2009	06FW142	21.3	0.6	29.4392	90.7108			9
Ji et al., 2009	06FW146	56.9	1.4	29.4028	90.7175			13
Ji et al., 2009	06FW147	51.5	0.8	29.3675	90.7244			13.4
Ji et al., 2009	06FW148	51.3	0.6	29.3675	90.7244			11.7
Ji et al., 2009	06FW151	55.5	1.2	29.3575	90.7167			12.7
Ji et al., 2009	06FW152-2	57.3	0.9	29.4014	90.1789			12.9
Ji et al., 2009	06FW154	51.3	0.7	29.5781	90.2742			8.2
Ji et al., 2009	06FW155	61.1	1.2	29.5425	90.2731			7.7
Ji et al., 2009	06FW156	55.4	0.8	29.4994	90.2711			8.5
Ji et al., 2009	06FW157	32.5	0.5	29.4136	90.2233			5
Ji et al., 2009	06FW158	14.9	0.3	29.5208	90.0419			4.7
Ji et al., 2009	06FW159	15.3	0.2	29.6069	89.9839			4.6
Ji et al., 2009	06FW160	13.7	0.3	29.6069	89.9839			6.2
Ji et al., 2009	06FW161	13.5	0.4	29.6069	89.9839			6.4
Ji et al., 2009	06FW162	50.9	0.8	29.5389	89.6225			11.8
Ji et al., 2009	06FW163	48.2	0.7	29.5389	89.6225			11
Ji et al., 2009	06FW164	184.9	3.8	29.5219	89.6233			14.4
Ji et al., 2009	06FW165	194	3.5	29.5033	89.6311			15.3
Ji et al., 2009	06FW166	205.3	3	29.5033	89.6311			14.8
Ji et al., 2009	06FW167	155.9	2.3	29.4397	89.6319			11.6
Ji et al., 2009	06FW168	174.2	2.5	29.4397	89.6319			13.6
Ji et al., 2009	06FW169	151.8	1.6	29.4397	89.6319			13.2
Ji et al., 2009	06FW170	108.6	1.5	29.3928	89.6283			13.2
Ji et al., 2009	06FW174	50.2	1.5	29.3511	90.0969			10.9
Ji et al., 2009	06FW175	52.6	1.2	29.3489	90.0672			11.2
Ji et al., 2009	06FW176	53.6	1	29.3347	90.2492			11.3
Ji et al., 2012b	06FW101	64.7	1.1	29.6867	91.1117					72.29	0.27	14.28	1.99		0.05	0.57	2.24	4.13	3.62	0.07	4.35	23.53	2.66	2.5	1.85	1.62		24.47	14.45		100	197	27.16	108	9.11	3.08	415	29.7	58.95	6.9	25.45	4.86	0.78	4.26	0.69	4.46	0.92	2.7	0.44
Ji et al., 2012b	06FW104	64.4	0.9	29.6753	91.0756					71.71	0.37	14.26	2.52		0.08	0.83	2.32	4	3.28	0.1	4.9	31.73	1.84	3.56	1.09	1.69		32.84	14.57		93	201	23.78	171	9.08	3.52	523	28.8	52.66	6.54	24.04	4.48	0.78	3.96	0.61	4.04	0.81	2.39	0.38
Ji et al., 2012b	06FW105	55.2	1.5	29.7589	90.7756					67.62	0.56	14.99	3.5		0.06	1.27	3.14	3.48	4.25	0.16	6.82	54.85	9.17	7.24	5.14	4.2		42.89	15.97		154	315	21.38	171	10.33	9.03	661	40.23	74.76	8.17	29.49	5	1.09	4.21	0.61	3.84	0.74	2.13	0.33
Ji et al., 2012b	06FW108	56.8	0.7	29.7589	90.7756					62.25	0.75	15.62	6.23		0.1	2.71	5.17	3.21	2.9	0.16	12.88	119.18	20.89	16.42	11.86	24.43		69.43	17		91	332	20.03	164	6.82	9.31	497	23.91	48.46	5.7	21.63	4.31	1.01	3.95	0.59	3.65	0.71	1.97	0.29
Ji et al., 2012b	06FW110	54.3	0.9	29.7375	90.8331					73.45	0.22	13.54	1.74		0.04	0.42	1.78	3.18	4.81	0.05	4.3	19.93	1.59	2.62	1.25	3.56		20.24	13.39		202	143	29.89	132	9.18	9.11	380	24.8	50.82	5.9	22.9	4.63	0.61	4.23	0.7	4.87	0.98	2.94	0.48
Ji et al., 2012b	06FW111	50.6	0.7	29.4433	90.9564					66.49	0.5	15.1	4.32		0.08	1.69	3.71	3.84	3.3	0.16	6.81	81.57	9.95	10.2	5.85	6.71		44.9	15.91		66	324	11.32	187	5.81	4.52	454	20.8	37.5	4.08	13.96	2.41	0.71	2.06	0.3	1.9	0.39	1.15	0.19
Ji et al., 2012b	06FW112	53.4	1	29.4906	90.9611					60.23	0.66	17.15	6.65		0.12	2.91	6.39	3.9	1.85	0.19	11.93	151.34	13.31	15.46	7.23	27.82		64.66	17.15		20	386	24.55	98	7.08	3.54	370	15.45	31.82	4.69	19.25	4.24	1.02	3.97	0.63	4.16	0.87	2.49	0.38
Ji et al., 2012b	06FW118	51	0.7	29.4992	90.9386					73.27	0.24	13.53	1.75		0.03	0.54	1.76	2.9	5.22	0.05	3.99	26.56	3.36	3.38	2.39	4.36		21.5	11.04		131	229	6.7	115	2.75	4.96	555	13.63	25.88	2.79	10.16	1.79	0.61	1.41	0.21	1.2	0.23	0.61	0.1
Ji et al., 2012b	06FW119	51.2	0.7	29.4992	90.9386					63.91	0.67	15.92	5.51		0.09	2.32	4.65	3.64	3.21	0.19	10.93	124.42	19.2	14.97	10.53	13.31		62.11	15.86		119	476	13.1	179	5.19	6.16	690	17.44	33.38	3.8	13.98	2.93	0.83	2.41	0.37	2.13	0.45	1.21	0.19
Ji et al., 2012b	06FW120	50.3	0.6	29.4992	90.9386					51.94	1.43	17.25	10.47		0.18	3.87	8.1	4.21	1.52	0.48	25.54	267.94	0.35	26.09	5.04	220.41		113.99	19.32		34	627	15.16	72	9.21	1.41	359	28.96	55.28	6.64	25.64	5.14	1.34	3.98	0.56	2.81	0.55	1.37	0.21
Ji et al., 2012b	06FW121	51.1	0.7	29.4992	90.9386					75.29	0.13	12.73	1.16		0.01	0.29	1.43	2.6	5.26	0.03	0.32	26.93	1.09	2.69	1.06	5.81		13.96	9.48		120	371	1.54	98	0.68	3.14	1438	4.42	5.51	0.48	1.48	0.22	0.3	0.21	0.03	0.18	0.04	0.16	0.03
Ji et al., 2012b	06FW126	55.3	1	29.4817	90.8739					56.62	1.15	18.46	6.91		0.12	2.65	5.67	4.71	2.36	0.42	11.79	128.44	12.24	14.03	7.69	26.05		96.08	20.62		78	919	31.13	378	15.7	5.22	850	45.68	97.73	12.27	46.95	8.95	2.08	6.7	0.96	5.34	1.07	2.87	0.45
Ji et al., 2012b	06FW127	49.5	0.6	29.4817	90.8739					77.16	0.09	12.14	0.65		0.01	0.06	0.68	2.3	5.86	0.01	0.18	11.1	1.06	0.48	1.07	3.86		7.69	7.65		103	603	1.32	145	1.08	2.23	3084	4.77	7.18	0.6	1.91	0.28	0.43	0.24	0.03	0.17	0.04	0.14	0.03
Ji et al., 2012b	06FW128	49.9	1	29.4817	90.8739					54.99	0.76	17.12	8.8		0.2	4.43	7.03	3.83	1.66	0.2	22.34	220.48	12.09	25.89	9.43	40.28		102.23	17.81		106	591	19.11	90	6.89	13.04	223	13.8	28.64	3.63	14.67	3.54	1.01	3.1	0.5	3	0.66	1.84	0.29
Ji et al., 2012b	06FW129	52.9	0.7	29.4639	90.8967					57.43	1.05	18.67	6.24		0.11	2.32	5.27	4.73	2.71	0.37	10.5	112.71	10.1	12.43	6.46	21.87		91.11	20.24		65	942	25.33	339	13.52	2.74	1273	42.5	90.86	11.7	44.89	8.53	2.08	6.19	0.88	4.69	0.93	2.44	0.37
Ji et al., 2012b	06FW131	44	0.8	29.4078	90.9058					69.9	0.28	15.28	2.14		0.04	0.71	2.22	4.23	4.16	0.12	3.36	33.85	3.46	4.12	3.46	26.09		35.33	17.33		225	454	7.28	135	7.18	18.71	632	27.26	49.16	5.05	17.18	2.8	0.65	1.9	0.24	1.22	0.23	0.6	0.09
Ji et al., 2012b	06FW133	47.1	1	29.3336	90.8656					67.45	0.41	15.39	2.83		0.05	1.19	2.72	4.25	4.6	0.21	5	56.87	15.07	7	9.25	4.31		32.54	19.29		289	568	11.59	207	14.62	43.54	752	52.92	100.03	10.57	34.95	5.74	1.05	3.72	0.44	2.12	0.38	0.99	0.15
Ji et al., 2012b	06FW134	41.9	0.6	29.3606	90.8756					70.57	0.28	14.41	1.97		0.04	0.68	1.9	4	4.74	0.13	3.02	35.97	7.5	4.25	5.09	5.79		44.14	18.33		302	434	7.52	135	11.13	29.6	617	45.51	75.36	7.16	22.51	3.38	0.69	2.25	0.26	1.31	0.23	0.64	0.09
Ji et al., 2012b	06FW139	41.5	0.7	29.3831	90.7156					61.01	1.27	16.4	5.27		0.08	2.07	4.1	4.09	4.5	0.82	7.44	91.6	17.13	11.66	9.6	36.83		116.16	24.3		216	874	14.82	411	20.24	13.79	943	136.48	283.36	31.47	102.59	13.9	2.41	8.21	0.84	3.55	0.53	1.26	0.15
Ji et al., 2012b	06FW140	43.7	0.9	29.4725	90.7156					70.99	0.25	14.97	1.89		0.05	0.54	1.99	4.1	4.16	0.1	3.28	29.17	1.87	3.38	2.1	21.99		45.57	17.09		181	417	9.53	115	8.21	6.09	750	23.07	43.32	4.74	16.21	2.78	0.6	1.91	0.27	1.46	0.29	0.8	0.13
Ji et al., 2012b	06FW146	56.9	1.4	29.4028	90.7175					52.88	0.77	19.06	9.41		0.16	4.35	8.37	3.88	0.55	0.34	12.73	189.9	16.67	24.56	12.01	23.17		89.93	18.16		4	865	13.54	30	1.39	0.24	200	9.61	22.75	3.17	13.42	3.37	1.29	2.85	0.43	2.35	0.51	1.3	0.19
Ji et al., 2012b	06FW147	51.5	0.8	29.3675	90.7244					61.42	0.71	16.83	6.18		0.11	2.66	5.34	4.18	2.46	0.22	12.26	132.75	12.79	16.48	9.15	45.77		73.56	16.6		58	559	18.78	173	5.22	4.68	452	17.44	36.84	4.75	17.98	4.13	1.01	3.4	0.54	2.95	0.66	1.81	0.28
Ji et al., 2012b	06FW148	51.3	0.6	29.3675	90.7244					71.69	0.26	14.23	2.17		0.06	0.71	2.33	4.05	3.66	0.1	2.76	37.42	5.47	4.29	2.77	21.85		38.05	14.65		81	456	7.01	96	4.95	2.41	681	27.3	47.17	4.79	15.32	2.5	0.62	1.75	0.22	1.14	0.22	0.6	0.09
Ji et al., 2012b	06FW151	55.5	1.2	29.3575	90.7167					56.09	1.08	17.43	8.4		0.14	3.48	7.22	3.79	1.94	0.51	15.45	160.39	32.53	20.23	14.91	57.01		78.68	16.89		56	580	20.82	121	5.33	2.96	503	17.74	40.89	5.26	20.16	4.72	1.22	3.9	0.6	3.35	0.75	2	0.32
Ji et al., 2012b	06FW152-2	57.3	0.9	29.4014	90.1789					53.49	1.32	17.36	9.18		0.15	4.08	7.66	3.49	1.45	0.45	20.52	240.36	26.59	24.71	12.23	6.21		94.98	17.76		43	690	24.34	150	8.33	7.31	501	17.62	40.56	5.35	21.83	5.25	1.46	4.51	0.72	4.02	0.89	2.38	0.36
Ji et al., 2012b	06FW154	51.3	0.7	29.5781	90.2742					75.43	0.23	12.37	1.71		0.05	0.32	1.17	3.28	4.52	0.05	3.41	15.96	1.03	1.69	0.97	4.54		19.62	12.11		206	122	32.5	119	16.6	8.18	189	20.76	48.9	6.43	23.85	5.58	0.49	4.36	0.76	4.47	1.01	2.97	0.53
Ji et al., 2012b	06FW155	61.1	1.2	29.5425	90.2731					70.33	0.41	14.28	2.02		0.05	0.89	2.52	3.4	5.06	0.13	5.12	30.34	6.44	5.88	2.28	9.56		24.39	13.32		168	306	17.16	127	11.3	7.52	563	32.71	61.54	6.46	20.83	3.66	0.8	2.87	0.43	2.52	0.54	1.57	0.27
Ji et al., 2012b	06FW156	55.4	0.8	29.4994	90.2711					67.99	0.46	15.4	3.28		0.06	1.11	2.79	3.69	4.78	0.14	6.15	58.17	8.12	5.81	3.38	3.24		30.62	15.16		173	366	17.69	150	10.61	6.2	665	33.81	60.68	6.41	20.82	3.9	0.86	3.04	0.46	2.64	0.58	1.63	0.28
Ji et al., 2012b	06FW162	50.9	0.8	29.5389	89.6225					60.29	0.72	16.78	7.01		0.12	3.24	5.11	3.47	2.12	0.16	17.45	172.5	4.71	18.19	4.03	43.84		79.9	20.42		79	452	26.01	138	8.9	6.56	517	22.08	47.84	5.83	23.06	4.81	1.05	4.38	0.68	4.45	0.93	2.65	0.42
Ji et al., 2012b	06FW163	48.2	0.7	29.5389	89.6225					71.58	0.48	14.33	2.88		0.04	0.8	1.73	3.02	4.79	0.1	6.91	151.87	10.55	16.02	6.66	18.95		77.94	17.27		146	245	15.12	345	9.2	2.79	937	17.48	35.97	4.31	17.65	3.42	0.88	3	0.44	2.86	0.55	1.56	0.23
Ji et al., 2012b	06FW174	50.2	1.5	29.3511	90.0969					56.45	0.79	17.45	7.84		0.15	3.06	6.93	4.02	2.14	0.25	8.65	182.95	4.66	19.08	5.72	59.81		81.43	20.15		42	677	34.08	160	7.87	2.28	370	24.73	63.59	8.69	37.2	8.04	1.66	6.86	1.01	6.34	1.25	3.46	0.51
Ji et al., 2012b	06FW175	52.6	1.2	29.3489	90.0672					57.57	0.78	17.59	7.24		0.14	3.06	6.56	3.9	2.07	0.3	18.67	159.8	10.94	19.29	11.38	56.12		72.59	17.62		14	542	18.02	82	5.1	2.32	264	14.18	31.12	4.59	19.6	4.29	1.17	3.73	0.57	3.57	0.72	2	0.31
Ji et al., 2012b	06FW176	53.6	1	29.3347	90.2492					54.48	1.03	17.99	8.47		0.15	3.09	6.97	4.34	2.06	0.39	4.84	50.81	1.94	4.46	1.99	6.41		34.1	14.23		10	515	29.67	205	7.34	1.07	230	21.28	49.25	7.92	34.77	7.53	1.67	6.27	0.93	5.75	1.15	3.17	0.46
Ji et al., 2012b	08FW51	64.5	2.3	29.637	91.164			10.7		66.35	0.56	15.31	4.69		0.06	1.97	4.38	3.12	2.8	0.13	12.8	106	20.6	11.8	10.1	63.9		48.9	16.4		89.9	338	23.1	129	5.8	6.45	617	19.1	39.7	4.76	18.9	4.17	0.95	4.05	0.67	3.93	0.78	2.3	0.35
Ji et al., 2012b	09FW41	56.1	1.1	29.419	92.738			9.6		70.44	0.4	14.91	2.91		0.06	0.84	2.2	3.95	4.08	0.12	6.17	41.4	2.32	4.48	2.06	3.09		34.3	16.8		159	251	27.13	123	12.7	6.15	530	36.1	71.5	8.2	29.9	5.84	0.99	4.71	0.75	4.42	0.89	2.65	0.39
Ji et al., 2012b	09FW42	50.7	1.1	29.407	92.745			7.3		69.74	0.31	14.99	2.93		0.05	0.99	2.35	3.51	4.69	0.11	5.96	49.4	6.86	5.62	3.02	3.8		28.6	15.2		178	378	16.39	106	10.4	11.5	839	42.3	76.7	8	27.1	4.6	0.92	3.36	0.5	2.75	0.54	1.52	0.24
Ji et al., 2012b	09FW43	42	0.7	29.407	92.745			6.9		70.66	0.32	14.76	2.62		0.05	0.95	2.56	3.61	4.07	0.11	5.47	44.5	5.11	4.67	2.78	9.99		27.8	15.6		157	378	16.43	99	11.1	8.33	638	45.6	82.7	8.5	28.4	4.75	0.92	3.4	0.5	2.66	0.54	1.62	0.25
Ji et al., 2012b	09FW50	50.2	1.9	29.239	92.697			8.8		67.85	0.4	15.31	3.93		0.07	1.63	3.49	3.62	3.44	0.12	7.43	72.2	9.3	9.94	6.98	20.9		51.6	16.3		100	486	12.9	65	5.04	5.15	631	37.4	66.9	6.82	23	3.5	0.73	2.82	0.39	2.18	0.44	1.2	0.17
Ji et al., 2012b	ML06-1	34.9	0.4	29.154	93.679			7.8		65.72	0.39	17.09	3.27		0.07	1.24	3.65	5.19	2.61	0.21	4.9	71.6	5.45	7.12	5.41	23.6		65.6	21.1		80.4	1136	9.88	124	8.81	2.71	1073	44.8	82.4	9.01	32.4	5.03	1.29	3.48	0.41	1.94	0.32	0.88	0.12
Ji et al., 2012b	SR01-1	45.4	0.7	29.288	92.096			9.2		62.52	0.57	15.54	4.91		0.07	2.11	3.87	3.13	4	0.18	10.6	97.3	21.9	12.6	10.4	9.22		52	16.7		128	449	20.74	165	8.19	5.46	603	29.4	62.6	7.36	28.2	5.39	1.13	4.63	0.65	3.67	0.69	2.03	0.31
Ji et al., 2012b	SR02-1	37.7	0.7	29.288	92.119			6.2		72.05	0.21	14.88	1.91		0.05	0.59	1.75	4.01	3.82	0.09	2.84	23.9	0.92	2.74	1.04	9.59		32.4	16.3		215	393	7.29	104	7.4	17.2	736	20.8	37	3.88	13.2	2.11	0.56	1.63	0.22	1.25	0.24	0.7	0.1
Ji et al., 2012b	SR03-1	59.8	0.9	29.267	92.217			7.9		71.48	0.24	14.79	2.71		0.08	0.74	2.92	4.03	2.55	0.1	3.4	30.5	1.32	4.63	1.51	12.9		51.6	16.9		70.3	357	15.81	82	6.88	4.09	311	13.6	27.2	3.23	12.4	2.68	0.62	2.51	0.39	2.46	0.49	1.53	0.24
Ji et al., 2012b	SR04-1	42.1	0.7	29.316	92.237			7.7		61.81	0.59	17.04	5.86		0.11	2.24	4.64	4.05	2.49	0.24	9.63	89.4	2.99	12.4	3.75	22.1		74.7	19.8		119	532	22.53	168	9.55	13.7	330	31	61.7	7.29	27.9	5.36	1.07	4.58	0.66	3.88	0.76	2.15	0.34
Ji et al., 2014	08FW50	61.7	0.7	29.635	91.184			10.6		68.1252	0.49	14.9781	4.216		0.07	1.68	3.90093	3.22	3.21	0.11	11.5216	91.0947	17.3904	10.9867	8.68487	11.2413		47.2206	16.2536		109.442	299.885	22.3448	113.781	5.74503	4.14557	687.098	25.3266	50.2613	5.71344	21.5249	4.27387	0.902979	3.99535	0.630442	3.70284	0.75262	2.17949	0.332968
Ji et al., 2014	08FW51*	64.5	2.3	29.637	91.164					66.3549	0.56	15.3139	4.6934		0.06	1.97	4.37963	3.12	2.8	0.13	12.7622	106.102	20.5693	11.7501	10.077	63.8859		48.8575	16.3782		89.8962	337.888	23.1045	128.595	5.80427	6.44777	617.407	19.0892	39.6713	4.76243	18.8564	4.16774	0.947631	4.05077	0.665618	3.93124	0.784448	2.30495	0.345759
Ji et al., 2014	08FW54	65.8	1.1	29.729	91.985			9.2		54.8304	0.84	17.2367	7.92138		0.13	4.02	7.68982	3.02	1.17	0.24	23.3532	207.391	37.4247	24.3854	19.2932	42.8615		90.2339	18.1744		27.8813	733.799	22.7218	130.37	5.88342	0.615903	290.225	21.2697	44.8605	5.55724	22.6319	4.6287	1.25965	4.40887	0.666593	3.89066	0.780338	2.34375	0.335473
Ji et al., 2014	08FW55	66.9	0.8	29.729	91.985			8.1		72.655	0.24	14.4869	2.00045		0.08	0.63	2.01667	3.74	3.64	0.08	6.28612	28.9354	1.40976	3.53346	1.23093	2.13964		35.1447	14.5928		106.512	236.835	23.2616	91.6778	8.87144	3.89101	538.566	18.8275	37.5937	4.17447	15.1532	3.27728	0.681235	3.15654	0.54671	3.59031	0.734944	2.29553	0.362414
Ji et al., 2014	08FW56	68.3	0.8	29.709	92.2			9.7		65.5791	0.52	16.2055	4.36279		0.07	1.91	4.25741	3.83	2.52	0.16	9.15672	95.1881	24.1645	11.8387	13.2094	8.36377		52.3658	17.7902		71.7513	553.439	13.9494	87.5682	5.97473	2.67326	523.972	17.0388	34.6494	4.04683	15.8152	3.11144	0.894814	2.79319	0.424587	2.4064	0.460405	1.39382	0.190408
Ji et al., 2014	08FW66	67.4	0.8	29.716	92.04			7.1		76.0261	0.13	13.5314	0.944936		0.09	0.18	0.896296	4.04	3.88	0.03	4.08722	5.8085	0.361678	0.661036	0.313432	4.00214		17.8939	13.4916		133.984	93.9392	29.0297	64.4263	11.6948	5.03005	510.113	15.655	32.8239	3.71502	13.0774	3.15281	0.479209	3.32206	0.623875	4.32334	0.902412	2.71811	0.435948
Ji et al., 2014	09FW08	66	0.8	29.624	93.307			9.2		47.337	1.51	18.6255	12.4711		0.14	5.81	9.32963	2.88	0.89	0.17	34.3915	447.185	13.6807	41.9564	32.9367	83.2576		85.9924	19.6712		21.9141	631.633	22.0891	51.0167	4.27717	2.2242	177.943	14.3245	32.6269	4.32472	18.4877	4.43464	1.36676	4.43584	0.70339	4.01199	0.807236	2.15456	0.2893
Ji et al., 2014	09FW09	66.6	1.3	29.624	93.307			8.8		54.3819	0.54	19.146	6.0114		0.1	5.43	11.1731	2.41	0.45	0.11	27.8113	137.936	96.3699	25.4727	54.5094	47.209		48.7595	15.9178		7.11888	634.602	13.7375	56.4855	3.14115	0.858742	111.959	13.0814	27.1033	3.35408	13.2612	2.89041	0.859811	2.67268	0.4179	2.47949	0.503001	1.35818	0.196491
Ji et al., 2014	09FW10	66.2	1.1	29.624	93.307			7.9
Ji et al., 2014	09FW11	64.7	1.8	29.624	93.307			7.8		70.1761	0.36	15.2847	3.4078		0.08	0.9	2.53611	3.85	3.31	0.15	5.66687	40.8426	3.81383	4.8956	2.48136	3.06838		55.1096	17.4885		115.286	420.923	18.633	152.761	10.6485	3.89494	557.607	42.6737	78.0815	8.46572	29.8197	5.10919	1.06392	3.99486	0.602678	3.126	0.61456	1.66491	0.26644
Ji et al., 2014	09FW25	87.2	1.1	29.186	93.968			12.6		55.2744	0.83	17.5825	8.5743		0.15	4.01	7.32315	3.61	1.25	0.21	20.2524	204.422	30.3544	25.0378	19.224	15.6461		93.2452	19.5115		30.5821	579.843	15.4531	43.7397	3.82668	1.49165	254.955	14.3774	30.7743	3.8847	15.8242	3.24585	1.07331	3.06383	0.483223	2.77874	0.549192	1.47403	0.210357
Ji et al., 2014	09FW26	87	1.2	29.178	93.933			12.9		55.9656	0.81	17.6248	8.3835		0.14	4.07	7.24167	3.68	1.4	0.22	18.9245	161.684	31.9829	21.0111	17.9675	52.6001		77.5261	15.6609		27.6899	452.678	14.7519	12.1039	3.17427	1.20519	297.031	10.0552	21.8319	2.88929	12.5121	2.90561	0.811901	2.81481	0.437883	2.61121	0.538904	1.48111	0.206827
Ji et al., 2014	09FW30	76.7	1.6	29.151	93.204			11		72.2509	0.21	15.0876	2.09092		0.05	0.49	2.93333	4.36	1.86	0.08	2.83324	23.8114	0.933764	2.93765	0.912139	9.86033		50.3065	17.7168		34.3699	726.096	6.44766	94.8112	4.07559	0.812771	677.051	32.5573	60.7721	6.78193	24.3959	3.85633	0.876935	2.5504	0.294444	1.24301	0.224901	0.591048	0.082659
Ji et al., 2014	09FW33	79.7	1.3	29.123	93.178			10.1		72.7593	0.18	15.0358	1.76924		0.05	0.4	2.58704	4.38	2.37	0.06	2.92583	14.0414	0.67104	1.8426	0.697907	6.6065		46.8499	17.3807		65.2161	584.47	9.85877	100.063	5.63788	2.75208	516.958	20.5243	38.9426	4.27911	15.4154	2.80195	0.633131	2.2454	0.320134	1.67869	0.3159	0.861143	0.135092
Ji et al., 2014	09FW34	94.9	1.7	29.14	93.128			11.3		58.8693	0.59	19.1511	5.36834		0.09	2.76	6.43704	4.45	1.64	0.2	13.1073	127.392	27.3527	15.0418	19.9156	4.66186		73.3987	21.0218		56.8843	658.21	12.7803	91.278	5.72208	2.69233	336.314	7.94403	19.6117	2.8994	13.2616	3.08626	1.002	2.74808	0.403153	2.34265	0.440139	1.20646	0.16645
Ji et al., 2014	ML03-1	90.3	1.6	29.118	93.87			12.9		54.5915	0.72	18.6752	8.51155		0.15	3.85	7.91389	3.88	1.04	0.21	14.6116	169.197	13.3405	20.5433	13.9372	39.5117		76.3216	18.7428		20.961	583.64	13.4679	48.6521	2.69251	0.624268	276.861	11.2954	24.1514	3.14621	13.4463	2.92227	0.91684	2.82272	0.425133	2.46109	0.465996	1.30055	0.190386
Ji et al., 2014	ML04-1	86.5	2.4	29.126	93.837			13		59.0935	0.73	16.854	6.95		0.11	3.15	6.325	3.92	0.97	0.19	20.548	194.124	12.5761	25.0504	14.1498	60.983		90.8993	19.7906		21.8509	584.384	16.0767	26.4806	2.81063	1.14928	253.95	10.3199	22.1961	2.91363	12.5715	2.96378	0.94593	3.0534	0.469509	2.83286	0.553619	1.6497	0.244095
Ji et al., 2014	ML05-1	78.4	1.2	29.141	93.766			11.4		70.93	0.24	15.1588	2.2347		0.04	0.55	2.91296	4.08	2.38	0.11	2.15292	24.237	1.09244	2.92207	1.10624	7.60407		46.7456	16.1623		41.8483	691.34	4.79095	67.623	3.31245	0.482053	1022.79	18.1709	33.7503	3.7033	12.7134	1.89326	0.748443	1.34011	0.17217	0.834426	0.15898	0.438036	0.063903
Ji et al., 2014	ML07-1	73.5	1.2	29.168	93.518			10.2		69.8817	0.25	16.7635	2.45199		0.03	0.53	3.80926	5.21	0.93	0.1	1.97458	22.2801	0.681861	2.69984	0.77773	9.8901		48.2625	18.2178		21.0496	821.075	2.3755	68.5049	1.87324	0.348143	276.79	10.3221	19.4076	2.11535	7.53565	1.15166	0.56916	0.870598	0.106633	0.470014	0.084419	0.219755	0.031994
Ji et al., 2014	ML08-1	74.4	1.4	29.153	93.466			8.8		74.0809	0.11	14.9825	0.944936		0.02	0.19	2.16944	4.42	2.99	0.02	0.805145	7.16255	0.667571	0.909275	0.865031	2.89914		23.2666	14.8978		47.8944	601.991	1.33865	61.2121	1.08218	0.37791	612.765	9.44296	18.4694	2.04942	7.08533	1.0358	0.399811	0.590862	0.064137	0.252604	0.043949	0.149772	0.021897
Ji et al., 2014	ML09-1	78	1.3	29.06	93.381			10.8		72.4821	0.23	14.9511	2.212		0.07	0.55	2.89259	4.22	2.32	0.11	2.67576	18.2828	0.682522	2.35471	0.726797	5.66245		48.5511	16.888		67.0845	502.938	10.6959	74.1095	6.72181	3.60691	422.249	21.1454	41.4651	4.67059	16.8555	3.00882	0.659477	2.26437	0.311233	1.71358	0.326517	0.935108	0.151025
Ji et al., 2016	12FW58	45		29.9838	98.8741	0.706726	5.1			47	3.31	13.89		12.23	0.2	10.38	9.09	3.16	0.08	0.66		206	222	47	172	49		114	21		4.2	582	30.9	289	70	1.78	453	43.3	87.2	10.81	43.1	9.06	2.97	8.05	1.15	6.2	1.13	2.73	0.36
Ji et al., 2016	12FW61	45		29.9838	98.8741	0.706705	5.4			49.55	3.19	18.12		10.6	0.14	4.31	6.68	6.28	0.35	0.77		151	3	27	9	48		93	22		12	697	34.3	224	87	0.5	556	41.1	81	9.93	39.7	8.89	2.7	8.19	1.19	6.65	1.28	3.13	0.42
Ji et al., 2016	12FW63	45		29.9838	98.8741	0.706584	5.8			46.22	3.89	17.75		12.15	0.14	7.23	7.41	3.89	0.85	0.46		294	10	48	45	85		103	20		28	389	24.4	170	52	0.81	326	25.8	49.7	6.21	25	5.8	1.96	5.62	0.85	4.84	0.93	2.26	0.31
Ji et al., 2016	13JT04	45	1.4	29.9838	98.8741	0.707151	5.8			47.59	3.31	16.07		11.13	0.17	7.84	8.68	4.5	0.17	0.55		275	40	36	45	69		92	20		3.6	635	26.4	172	47	0.81	284	27.2	55.6	6.78	29.5	6.62	2.44	6.76	1.01	5.47	1.03	2.67	0.32
Ji et al., 2016	13JT05	45		29.9838	98.8741	0.707293	6.1			48.02	3.08	15.32		9.01	0.14	7.94	11.97	3.96	0.18	0.37		298	220	35	69	68		70	18		4.3	843	24.8	157	36	0.62	739	21.8	45.2	5.7	25.4	6	2.17	6.47	0.97	5.43	0.95	2.47	0.3
Ji et al., 2016	13JT06	45		29.9838	98.8741	0.707101	6.1			47.61	3.23	15.58		9.36	0.14	7.84	11.53	3.96	0.27	0.47		314	210	38	73	69		77	19		6.2	592	27.5	171	39	0.55	1450	25	51.5	6.33	29.6	6.96	2.54	7.33	1.07	5.82	1.04	2.68	0.33
Ji et al., 2017	08FW62	66.4	0.7	29.744	94.286			-6		74.05	0.25	14.11	2.23		0.04	0.47	2.73	3.01	3.03	0.07											81	354	16.6	148	8.67	3.33	573	29.7	58.3	6.68	25.4	4.66	1.42	3.88	0.55	2.94	0.57	1.67	0.25
Ji et al., 2017	11JT14	59.9	1	29.725	94.687			-7.3
Ji et al., 2017	11JT15	26.8	0.4	29.725	94.687			3.7		69.51	0.27	15.88	2.42		0.03	0.6	2.58	3.42	4.11	0.134											109	616	6.2	121	4.2	1.63	820	19.5	38.7	4.24	16	2.44	0.92	1.8	0.22	1.15	0.21	0.59	0.08
Ji et al., 2017	11JT16	23.3	0.6	29.725	94.702			2.1		72.72	0.21	14.62	1.98		0.02	0.39	1.58	3.74	3.71	0.038											129	382	6.2	115	11.9	1.54	796	29	57.2	6.21	22.8	3.46	0.85	2.3	0.26	1.22	0.2	0.58	0.07
Ji et al., 2017	LZ01-1	26.7	0.8	29.577	94.464			3.4		67.37	0.54	17.01	3.46		0.04	1.05	3.25	4.04	2.48	0.24											95.7	758	18.1	120	8.82	2.48	543	52.7	101	11.7	42.1	6.48	1.36	4.39	0.59	3.17	0.61	1.73	0.24
Ji et al., 2017	LZ01-7	27.7	1	29.577	94.464			3.3		68.81	0.48	16.21	3.04		0.04	0.84	2.88	3.78	3.18	0.2											102	631	16.4	143	7.7	1.71	916	42.6	83.1	9.67	35.8	5.71	1.32	4.03	0.55	3.07	0.57	1.56	0.21
Ji et al., 2017	LZ02-1	27	1	29.57	94.487			3.4		68.71	0.51	16.51	3.04		0.04	0.91	2.85	4.11	2.89	0.22											100	689	9.95	163	6.07	3.19	775	41.2	79.6	9.2	33.8	5.3	1.07	3.53	0.42	2.02	0.35	0.93	0.13
Ji et al., 2017	LZ02-3	26.8	1.4	29.57	94.487			3
Ji et al., 2017	LZ03-1	27.6	2.7	29.568	94.565			2.9		68.44	0.59	16.33	3.37		0.04	0.92	3.31	4.34	2	0.19											91.8	625	11.2	131	6.95	3.7	331	48.5	93.8	10.6	38	5.52	1.18	3.46	0.43	2.16	0.37	0.9	0.11
Ji et al., 2017	LZ04-1	26		29.562	94.576					67.66	0.52	16.67	3.38		0.03	1.05	3.51	4.23	2.08	0.27											93.8	722	20.7	137	9.65	2.66	386	41.7	81.2	9.36	34.6	5.78	1.25	4.52	0.7	4.07	0.7	1.61	0.18
Ji et al., 2017	LZ06-1	25.3	1.1	29.565	94.576			2.9		64.37	0.68	17.79	4.23		0.04	1.34	3.99	4.45	2.22	0.35											104	766	17	130	9.6	2.57	406	45.2	88.2	10.2	38.7	6.52	1.13	5.37	0.81	4.24	0.62	1.16	0.11
Ji et al., 2017	LZ07-1	26.3	1.1	29.618	94.624			3.2		68.61	0.46	16.49	3.04		0.04	0.91	3.15	4.27	2.38	0.22											88.5	602	22.4	135	9.9	2.22	551	35.6	72.6	8.48	31.5	6.13	1.2	5.36	0.85	4.79	0.82	1.91	0.23
Ji et al., 2017	LZ08-1	26.7	1.9	29.612	94.617			2.7		68.69	0.48	16.56	2.94		0.04	0.87	3.21	4.45	2.46	0.18											72.9	696	6.69	138	5.63	2.02	632	43	80.3	9.43	34.1	4.87	1.26	3.16	0.35	1.48	0.24	0.62	0.088
Ji et al., 2017	LZ08-2	27.8	0.7	29.612	94.617			2.5		68.47	0.48	16.53	3.09		0.03	0.93	3.2	4.23	2.47	0.19											78.9	598	10	116	9.67	2.63	512	33.7	68.2	8.06	30.6	5.68	1.37	4.4	0.52	2.34	0.36	0.86	0.11
Ji et al., 2017	LZ09-2	51.2	1.5	29.545	94.469			-10.4		75.22	0.41	13.15	2.54		0.03	0.7	3.1	3.51	1.09	0.09											47	496	7.62	225	5.79	1.24	175	29.5	55.6	6.41	23.9	3.63	1.01	2.61	0.3	1.54	0.26	0.7	0.1
Ji et al., 2017	LZ09-3	26.9	2.1	29.545	94.469			3		70.86	0.41	15.33	2.52		0.04	0.69	2.52	4.01	3.31	0.13											93.2	548	7.64	114	6	2.1	857	41	79.9	9.07	33.4	5.13	1.03	3.24	0.36	1.65	0.25	0.64	0.085
Ji et al., 2017	LZ10-1	27.2	1	29.543	94.465			3.9		71.41	0.22	16.15	1.45		0.02	0.38	3.09	4.82	1.75	0.1											91.2	627	9.55	149	6.38	1.08	864	43.3	83.1	9.43	34.8	5.49	1.2	3.67	0.42	1.96	0.33	0.88	0.11
Ji et al., 2017	LZ11-1	44.3	0.8	29.458	94.458			3.3		73.11	0.29	14.12	2.4		0.05	0.59	2.26	3.47	3.35	0.09											99.5	444	8.58	131	5.07	0.72	1364	64.2	112	11.4	38.2	5.2	1.21	3.54	0.41	1.87	0.3	0.7	0.095
Ji et al., 2017	LZ13-1	67.1	1.1	29.639	94.381			-0.8		68.23	0.59	15.64	4.41		0.06	1.4	4.45	3.5	1.66	0.19											50.4	594	11.1	103	5.88	1.09	688	52.7	91.1	9.71	33.2	4.76	1.58	3.51	0.42	2.13	0.39	1.07	0.15
Ji et al., 2017	LZ14-1	28.1	1.4	29.662	94.344			1.7		74.13	0.13	14.49	1.41		0.06	0.3	1.65	3.76	3.61	0.13											106	372	10.4	75.3	7.61	2.09	758	21.8	41.1	4.59	15.9	2.82	0.71	2.28	0.33	1.85	0.32	0.85	0.12
Ji et al., 2017	LZ15-1	23.4	1.2	29.632	94.348			1.6		75.86	0.11	13.72	1.25		0.05	0.27	1.5	3.98	2.99	0.05											94.7	272	12.7	73	8.34	1.24	440	17.9	34.3	3.83	13.5	2.57	0.58	2.24	0.36	2.13	0.38	1.07	0.15
Ji et al., 2017	LZ15-5	64	1.2	29.632	94.348			1
Ji et al., 2017	LZ16-1	26.1	1.9	29.595	94.372			1.7		74.05	0.13	14.55	1.28		0.03	0.28	1.95	3.75	3.48	0.05											75.1	447	5.14	75.6	5.07	0.65	880	22.3	41.3	4.59	16	2.59	0.82	1.91	0.22	1.09	0.17	0.43	0.063
Ji et al., 2017	LZ16-2	67.4	1.4	29.595	94.372			-3.6
Ji et al., 2017	LZ17-1	51.7	1	29.462	94.425			-2.1		73.23	0.27	13.97	2.24		0.02	0.54	2.11	3.01	4.14	0.07											101	291	6.1	70.1	6.72	1.67	1121	45.5	86.4	9.65	34.4	5.19	1.8	3.59	0.39	1.68	0.23	0.52	0.052
Ji et al., 2017	LZ17-2	57.9	1.1	29.462	94.425			-5.6		67.65	0.69	14.92	5.26		0.03	2.11	3.42	3.02	2.29	0.15											103	320	10.2	63.6	9.01	2.2	372	22.9	46.7	5.64	22.6	4.66	1.19	4.05	0.52	2.48	0.38	0.85	0.1
Jiang et al., 2006	NQ2-1*			31.456	97.47		-0.7			43.99	0.75	12.4	3.59	2.91	0.13	6.9	15.5	1.86	4.49	1.05		169	214	29							120	4357	34	340	30		3324	188	385	46	171	27	7.1	17	1.9	7.6	1.1	2.7	0.35
Jiang et al., 2006	NQ21-4*			31.456	97.47		-1.2			54.98	0.53	15.74	3.16	1.14	0.09	3	6	3.54	5.85	0.37		113	115	14							184	2513	26	449	25		1960	139	269	28	93	13	3.3	8.9	1	4.8	0.75	2.3	0.31
Jiang et al., 2006	NQ7-1*			31.456	97.47		-3.2			66.17	0.41	14.79	2.1	0.9	0.03	1.2	4	3.43	4.46	0.18		101	98	6.1							165	1205	16	175	9.7		1024	52	109	12	46	7.2	1.8	5	0.63	3.1	0.5	1.4	0.2
Jiang et al., 2006	Y1-11	38.86	0.8	31.456	97.47	0.706559	-2.4			66.61	0.39	17.02	0.88	0.71	0.03	0.93	2.57	3.62	4.75	0.21		45	13	3.3							173	1024	13	242	8.5		1038	78	142	14	49	7.4	1.7	5.3	0.6	2.8	0.49	1.3	0.19
Jiang et al., 2006	Y1-12	38.86	0.8	31.456	97.47					66.58	0.4	16.52	1.64	1.19	0.03	1.17	2.27	3.66	4.5	0.22		48	15	5.4							183	956	13	254	9.6		966	74	139	15	53	8.1	1.8	5.6	0.65	2.8	0.5	1.4	0.2
Jiang et al., 2006	Y1-13	38.86	0.8	31.456	97.47	0.70695	-2.4			67.28	0.37	16.36	1.42	0.93	0.02	0.98	1.84	3.53	4.92	0.2		49	12	4.9							185	937	12	238	9.2		1241	66	133	13	47	7.2	1.7	5	0.59	2.6	0.45	1.3	0.18
Jiang et al., 2006	Y1-14	38.86	0.8	31.456	97.47					66.92	0.37	16.65	1.59	0.94	0.04	1.1	2.29	3.82	4.5	0.2		52	12	5.3							183	1006	13	297	9.6		963	57	121	12	44	7.3	1.7	5.1	0.58	2.7	0.47	1.3	0.2
Jiang et al., 2006	Y1-15	38.86	0.8	31.456	97.47					67.07	0.39	16.38	1.74	0.98	0.03	0.98	2.3	3.75	4.66	0.2		52	21	5.3							188	988	13	248	10		1057	65	129	14	49	8	1.9	5.4	0.64	2.9	0.52	1.4	0.2
Jiang et al., 2006	Y1-16	38.86	0.8	31.456	97.47	0.706528	-2.5			69.35	0.37	16.23	1.07	0.43	0.01	0.79	1.42	3.68	4.89	0.12		50	16	1.4							190	924	5.1	270	9.7		865	31	59	6.8	24	3.2	0.91	2.2	0.23	1.1	0.2	0.58	0.1
Jiang et al., 2006	Y1-18	38.86	0.8	31.456	97.47	0.706286	-2.4			68.34	0.37	15.96	0.81	0.65	0.01	1.16	0.77	2.59	6.89	0.25		45	13	3.7							245	612	8.9	249	9.1		871	48	96	10	36	5.6	1.3	3.8	0.44	2	0.34	0.93	0.14
Jiang et al., 2006	Y1-8	38.86	0.8	31.456	97.47					66.24	0.4	16.84	1.73	0.88	0.02	1.1	2.19	3.63	4.41	0.23		54	15	4.2							170	993	16	297	10		977	70	139	15	54	8.7	2	6.2	0.74	3.4	0.6	1.6	0.24
Jiang et al., 2006	Y1-9	38.86	0.8	31.456	97.47	0.706512	-2.6			66.39	0.39	16.77	1.71	0.96	0.02	1.05	2.08	3.57	4.74	0.21		50	13	5.8							181	999	14	371	9.4		1046	75	141	15	50	7.7	1.8	5.6	0.64	2.9	0.52	1.4	0.2
Jiang et al., 2006	Y115-90			31.456	97.47					64.8	0.52	16.44	1.23	1.76	0.06	2.47	2.94	3.77	4.27	0.03
Jiang et al., 2006	Y2-1	38.86	0.8	31.456	97.47	0.70685	-2.6	2.95		66.93	0.37	16.19	1.5	0.79	0.04	1.36	1.97	4.09	4.17	0.19		50	167	7.8							190	742	12	254	9		831	53	106	10	39	6.2	1.5	4.4	0.51	2.4	0.46	1.2	0.18
Jiang et al., 2006	Y2-2	38.86	0.8	31.456	97.47	0.706696	-2			66.35	0.41	16.37	1.56	0.78	0.02	1.19	2.25	4	4.94	0.22		51	25	8.1							239	737	12	297	9.8		1120	49	104	11	40	6.6	1.5	4.5	0.56	2.6	0.46	1.3	0.19
Jiang et al., 2006	Y2-3	38.86	0.8	31.456	97.47					67.65	0.34	16.26	1.18	1.06	0.03	1.11	1.76	4.1	4.78	0.16		44	26	2.8							187	852	11	347	8.2		1046	43	81	8.6	32	5.4	1.3	3	0.48	2.2	0.4	1.1	0.17
Jiang et al., 2006	Y2-4	38.86	0.8	31.456	97.47	0.706708	-2.9			67.22	0.35	16.15	1.52	1.01	0.03	1.14	1.92	4	4.45	0.17		44	15	5.9							197	763	11	313	8.6		941	44	85	9.1	34	5.5	1.4	4	0.48	2.2	0.41	1.1	0.17
Jiang et al., 2006	Y2-5	38.86	0.8	31.456	97.47					67.66	0.34	16.28	1.46	0.96	0.03	1.12	2.25	4.07	4.36	0.17		46	18	5.2							212	772	11	322	7.9		780	45	94	10	37	5.7	1.5	4	0.48	2.3	0.42	1.1	0.17
Jiang et al., 2006	Y2-6	38.86	0.8	31.456	97.47					67.14	0.39	16.08	1.29	1	0.04	1.35	2.29	4.11	4.42	0.2		48	70	3							196	799	12	343	8.9		1182	54	111	11	41	6.1	1.5	4.6	0.54	2.5	0.44	1.2	0.1
Jiang et al., 2006	Y2-7	38.86	0.8	31.456	97.47	0.706451	-2.5			67.55	0.34	16.16	1.05	1.13	0.03	1.08	2.21	3.89	4.73	0.17		42	27	4.3							198	868	11	289	8.5		1083	43	88	9.4	35	5.5	1.3	3.9	0.46	2.2	0.39	1.1	0.16
Jiang et al., 2006	Y2-8	38.86	0.8	31.456	97.47					67.53	0.33	16.34	1.62	0.79	0.04	1.04	1.98	3.85	4.86	0.16		45	27	2.9							229	648	11	244	8.1		1091	50	101	10	36	5.9	1.4	4.1	0.5	2.3	0.4	1.1	0.17
Jiang et al., 2006	Y2-9	38.86	0.8	31.456	97.47	0.706565	3			67.45	0.34	16	1.34	1.02	0.03	1.09	2.15	4.08	4.64	0.17		42	15	7.4							208	840	11	264	8.2		974	42	87	8.7	33	4.7	1.2	3.7	0.45	2.1	0.39	1.1	0.17
Jiang et al., 2006	Z96-2*			31.456	97.47		-2.2			60.37	0.5	16.62	2.68	1.58	0.07	2.37	2.37	4.92	5.48	0.4		93	28	10							168	1332	22	209	16		1507	93	195	24	85	13	3.4	8.1	1	4.4	0.77	2.3	0.26
Jiang et al., 2015	09TB81	53.1818	1	29.2492	92.0231			9.14273		64.84	0.52	15.67	4.07		0.06	1.57	2.45	4.05	3.14	0.11	8.61	83	5.57	32.8	5.68				15.6	1.26	12	232	14.8	137	5.87	10.8	475	22.2	42.1	4.94	17.5	3.18	0.75	2.77	0.442	2.57	0.517	1.5	0.234
Jiang et al., 2015	09TB82	53.2	1	29.2353	92.0075			9.105		65.28	0.59	15.05	4		0.05	1.92	3.69	3.62	3.97	0.12	9.56	90.5	17.1	47.7	10.2				15.4	1.22	138	284	19.7	134	7.65	2.86	448	25.3	49.4	6.01	21.7	4.12	0.83	3.65	0.591	3.38	0.688	1.97	0.293
Jiang et al., 2015	09TB83			29.2914	91.9194					68.29	0.39	15.28	2.61		0.04	1.52	2.83	3.72	3.68	0.15	5.18	64.1	21.8	60.9	14.3				15.3	1.13	98.1	835	5.96	113	4.53	2.5	571	23.9	41.3	4.54	15.6	2.39	0.75	1.76	0.225	1.06	0.193	0.516	0.083
Jiang et al., 2015	09TB84	92	2	29.2811	91.8772			11.055		66.82	0.49	15.26	3.29		0.05	2.11	3.56	3.72	3.53	0.18	7	84.7	36.6	52.8	22.9				16.4	1.17	84.9	957	8.06	92	5.27	2.21	767	28.3	52.4	6.07	21.6	3.38	1.01	2.61	0.331	1.55	0.281	0.732	0.105
Jiang et al., 2018	NCN-HSY3‚Äì1	73		30.2183	85.2663	0.70695	-4.3			53.93	1.16	16.46	2.59	5.75	0.13	4.9	7.8	2.68	1.39	0.31											33.14	702.34	20.13	128.67	6.84		269.06	26.11	53.57	7.76	30.01	6.03	1.69	5.39	0.84	4.28	0.81	2.06	0.29
Jiang et al., 2018	NCN-HSY6	73		30.2183	85.2663	0.70727	-5.2			55.84	1.13	17.12	2.75	5.2	0.13	3.76	6.49	3.23	1.46	0.3											38.65	685.01	20.78	138.18	8.68		319.05	29.18	58.34	8.1	30.61	6.01	1.63	5.48	0.85	4.32	0.83	2.19	0.31
Jiang et al., 2018	NCN-HSY7	73		30.2183	85.2663	0.70749	-5.8			55.27	1.14	16.79	2.98	5.25	0.13	4	6.34	3.19	1.63	0.3											45.23	685.22	18.21	133.67	7.9		374.12	25	50.06	7.03	26.51	5.16	1.49	4.68	0.72	3.79	0.71	1.87	0.27
Jiang et al., 2018	NCN-HSY4	73		30.2183	85.2663	0.70706	-4.8			54.25	1.16	16.5	2.36	5.85	0.13	4.73	7.99	2.68	1.33	0.31											32.62	695.6	18.87	129.75	7.38		270.08	24.48	50.72	7.44	28.69	5.72	1.58	5.17	0.78	4.04	0.76	1.97	0.28
Jiang et al., 2018	NCN-HSY5	73		30.2183	85.2663	0.70705	-5			54.33	1.19	16.43	2.27	5.9	0.14	4.66	7.86	2.7	1.5	0.31											34.81	713.78	18.79	130.83	7.96		338.59	24.69	51.03	7.36	28.73	5.69	1.56	4.98	0.78	4.09	0.75	1.95	0.28
Jiang et al., 2018	NCN0506-tf1	73		30.2183	85.2663					79.01	0.07	11.69	1.01	0.23	0.01	0.2	0.02	2.2	4.04	0.02											154	74.33	60.46	124.84	20.07		328.53	15.8	40.7	5.77	26.88	8.76	0.29	10.28	1.84	11.53	2.34	6.71	1.03
Jiang et al., 2018	NCN0501-tf2	73		30.2183	85.2663					72.13	0.29	13.72	0.82	1.8	0.06	0.44	1.33	4.21	3.92	0.07											162.93	204.43	31.03	199.49	11.07		727.76	56.39	110.1	11.76	42.77	7.39	1.29	6.71	1.05	5.87	1.15	3.24	0.5
Jiang et al., 2018	NCN0501-tf4	73		30.2183	85.2663					69.92	0.32	14.01	0.69	2.17	0.06	0.5	1.85	3.63	3.84	0.08											145.83	180.75	32.75	209.09	9.61		739.46	56.67	109.78	11.93	42.72	7.38	1.4	6.9	1.11	6.04	1.22	3.46	0.53
Jiang et al., 2018	NCN0508-tf1	73		30.2183	85.2663					70.67	0.31	13.92	0.8	1.92	0.07	0.48	1.35	4.55	3.91	0.07											134.52	177.35	31.91	200.48	10.64		781.54	53.64	102.13	11.08	41.46	7.36	1.34	7.02	1.1	6.02	1.21	3.46	0.54
Jiang et al., 2018	NCN0502-tf1	73		30.2183	85.2663					71.02	0.31	13.52	0.72	2.08	0.07	0.52	1.59	4.01	3.81	0.07											129.68	211.46	31.23	200.18	10.8		733.06	51.6	101.47	10.97	40.08	7.08	1.36	6.63	1.05	5.71	1.12	3.27	0.49
Jiang et al., 2018	NCN0509-tf1	73		30.2183	85.2663					71.31	0.28	13.21	0.58	1.88	0.06	0.42	2.07	3.81	3.89	0.06											137.09	158.3	32	193.25	8.48		709.67	49.77	100.23	10.86	39.97	7.15	1.26	6.85	1.12	6.04	1.2	3.38	0.53
Jiang et al., 2018	NCN0501-tf1	73		30.2183	85.2663					75.62	0.09	13.62	0.97	0.33	0.03	0.19	0.32	1.8	5.34	0.01											183.07	61.8	37.81	123.85	11.7		180.82	28	67.22	8.51	35.48	8.37	0.35	8.08	1.33	7.26	1.44	3.99	0.63
Jiang et al., 2018	NCN0503-tf1	73		30.2183	85.2663					78.15	0.07	10.58	0.83	0.22	0.04	0.15	1.14	2.4	4.31	0.01											154	172.51	29.34	114.35	11.14		234.73	22.24	46.6	6.71	28.2	6.69	0.63	6.32	1.04	5.8	1.15	3.13	0.48
Jiang et al., 2018	NCN0501-tf3	73		30.2183	85.2663					71.64	0.3	13.53	0.94	2.03	0.06	0.5	1.51	3.66	4.1	0.06											166.44	215.35	28.89	192.16	10.18		752.28	47.53	90.35	9.98	36.92	6.64	1.26	6.42	1.01	5.56	1.11	3.11	0.48
Jiang et al., 2018	NCN0212-rœÄ1	73		30.2183	85.2663					75.12	0.11	10.52	0.68	0.25	0.06	0.38	3.45	0.86	4.48	0.02											148.58	159.59	18.48	87.52	9.79		905.01	45.8	83.85	8.47	28.98	4.41	0.94	3.9	0.64	3.33	0.66	1.9	0.32
Jiang et al., 2018	NCN0210-Œ≥œÄ3	73		30.2183	85.2663					74.89	0.13	12.23	0.38	1.08	0.03	0.43	1.98	0.65	4.95	0.02											169.2	197.04	29.03	178.6	11.11		642.6	52.21	106.17	11.85	44.2	7.92	1.05	6.87	1.09	5.68	1.07	3.08	0.49
Jiang et al., 2018	NCN0210-Œ≥œÄ1	73.3	0.7	30.2183	85.2663					76.56	0.12	10.68	0.25	0.95	0.02	0.33	1.92	1.34	5.13	0.02											130.82	261.43	27.62	189.98	9.91		1447.22	43.47	95.59	11.05	42.12	7.6	0.93	6.6	1	5.25	1.01	2.84	0.44
Jiang et al., 2018	NCN0210-Œ≥œÄ1(1)	73		30.2183	85.2663					76.73	0.11	11	0.24	0.93	0.02	0.34	1.48	1.31	5.07	0.02											138.04	242.23	27.56	184.04	7.12		1411.18	47.62	99.83	11.47	42.76	7.68	0.98	6.67	1.01	5.47	1.05	2.91	0.44
Jiang et al., 2018	NCN0212-Œ≥œÄ2	73		30.2183	85.2663					75.64	0.11	10.56	0.42	0.3	0.06	0.38	3.13	1.23	4.08	0.01											134.62	159.3	16.03	89.6	11.82		1041.24	31.85	60.46	6.28	21.35	3.49	0.59	3.14	0.51	2.73	0.58	1.71	0.3
Jiang et al., 2018	NCN0219-Œ≥œÄ1	72.4	0.6	30.2183	85.2663			-12.81		73.85	0.14	13.02	1.6	0.4	0.02	0.25	0.83	1.24	5.58	0.02											196.46	77.39	30.73	195.62	12.43		782.9	58.14	116.63	13.26	49.36	8.88	1.17	7.78	1.22	6.17	1.19	3.24	0.51
Jiang et al., 2018	NCN-HSY1	73				0.70807	-5.9
Jiang, Y., et al., 2012	KZ-1	10.46	0.25	37.7	75.15		-10.6	-7.7		62.27	0.59	13.99	3.96		0.07	1.92	4.85	3.28	7.71	0.47		64	32.8	6.9					22		324	1993	33	502	25.2		3621	161	290	33	120	19.7	4.6	14	1.54	7.25	1.11	2.76	0.38
Jiang, Y., et al., 2012	KZ-10	10		37.76	75.164		-8.9			63.53	0.4	16.99	2.33		0.05	0.29	2.28	2.74	10.64	0.06		33	29.7	3.1					22		400	3059	14	156	21.7		6015	97	194	21	75	11.2	2.5	7.9	0.73	3.66	0.58	1.44	0.17
Jiang, Y., et al., 2012	KZ-2	10		37.7083	75.1583		-10			67.01	0.33	15.63	2.17		0.06	0.36	1.96	4.53	6.81	0.09		24	53.6	1.5					21		219	1396	22	429	26.9		2988	153	220	24	77	11	2.7	7.2	0.96	4.35	0.8	2.05	0.31
Jiang, Y., et al., 2012	KZ-3	10		37.71	75.159		-9.7			66.59	0.31	15.02	2.1		0.08	0.46	2.57	3.29	8.44	0.13		29	13.6	1.7					21		283	1584	18	122	19.3		2840	106	187	22	70	10.1	2.2	6.8	0.7	3.33	0.6	1.59	0.25
Jiang, Y., et al., 2012	KZ-4	10.45	0.24	37.72	75.16		-8.6	-9.7		68.08	0.37	15.46	2.8		0.04	0.51	2.33	3.82	5.95	0.11		32	6.9	1.8					22		164	2115	26	512	28.9		3225	266	362	40	119	16.2	3.4	10.6	1.22	5.72	0.97	2.58	0.36
Jiang, Y., et al., 2012	KZ-5	10		37.73	75.161		-8.8			66.27	0.5	14.96	2.74		0.05	0.75	2.72	3.23	7.63	0.2		44	11.9	3.1					17		222	2028	22	537	22.9		4683	211	354	35	122	15.5	3.9	11.3	1.3	5.8	0.92	2.45	0.35
Jiang, Y., et al., 2012	KZ-6	10		37.74	75.162		-9.5			71.66	0.26	13.7	1.93		0.02	0.34	1.49	3.58	5.76	0.08		18	12.8	1					16		221	839	14	291	16.8		2210	175	240	25	77	9.2	1.9	6.2	0.72	3.38	0.59	1.68	0.26
Jiang, Y., et al., 2012	KZ-7	10		37.77	75.165		-12.2			62.23	0.59	13.75	3.49		0.08	2.09	5.63	2.83	8.03	0.59		62	32.3	7.8					18		280	2115	36	439	18.7		5652	179	406	49	192	30.9	7.4	20.7	2.35	10.41	1.39	3.5	0.47
Jiang, Y., et al., 2012	KZ-8	10		37.775	75.1667		-10.5			61.96	0.63	13.65	3.37		0.08	1.52	5.43	2.04	9.42	0.54		50	28.8	7.9					17		288	1417	28	198	18		9118	226	499	54	213	32.6	8.2	23.4	2.42	9.96	1.3	2.82	0.35
Jiang, Y., et al., 2012	KZ-9	10		37.75	75.163		-8.9			67.52	0.46	16.26	1.53		0.03	0.46	1.82	3.75	7.78	0.11		29	22.1	2.1					21		285	1961	27	328	23.4		3771	92	212	25	90	13.6	2.9	9.7	1.03	5.6	1.08	2.8	0.36
Jiang, Y., et al., 2012	SB-1	11.74	0.2	37.7833	75.25		-7.6	-7.2		72.12	0.28	14.21	1.68		0.02	0.45	1.55	3.5	5.3	0.09		18	6.9	1.5					19		197	1094	11	192	11.8		2429	29	72	9	36	5.8	1.3	4.2	0.48	2.28	0.39	1.05	0.15
Jiang, Y., et al., 2012	SB-2	12		37.79	75.26		-7.2			72.43	0.29	14.4	1.72		0.02	0.48	1.82	3.89	4.65	0.1		21	9.3	1.9					20		170	1051	10	204	10		2467	107	182	18	56	6.7	1.4	4.8	0.49	2.25	0.37	1.02	0.13
Jiang, Y., et al., 2012	SB-3	12		38.0833	75.9833		-8			68.53	0.45	15.21	2.9		0.04	0.81	2.43	3.67	5.3	0.13		41	14.2	4.8					20		127	1670	25	315	17.5		4291	236	393	36	115	14.5	2.8	10.8	1.21	5.72	0.91	2.37	0.32
Jiang, Y., et al., 2012	SB-4	12		38.1	75.9833		-7.4			70.18	0.34	14.99	2.24		0.03	0.66	2.18	3.69	5.18	0.11		29	10.8	3.1					21		148	1801	17	229	13.7		4213	227	390	36	113	12.7	2.5	8.8	0.87	4.04	0.61	1.68	0.22
Jiang, Y., et al., 2012	SB-5	12		38.1334	75.9833		-7.4			70.86	0.32	14.66	2.16		0.03	0.57	1.92	3.53	5.13	0.1		27	11.1	2.6					19		157	1459	17	234	14.4		3611	134	231	24	77	10.2	2	7.4	0.78	3.76	0.61	1.64	0.24
Jiang, Y., et al., 2012	SB-6	12		38.1167	75.9833		-7.1			71.87	0.27	14.26	1.79		0.02	0.46	1.75	3.5	5.28	0.09		19	7.5	1.7					19		201	1203	15	206	14.2		2789	123	227	22	74	9.2	1.8	6.4	0.7	3.26	0.53	1.52	0.21
Jiang, Y., et al., 2014	AR-1	110	2.4	37.6583	75.1333	0.70926				72.95	0.17	14.63	1.47		0.06	0.35	1.31	3.65	4.15	0.13		7.3	5		1.9				22		200	88	12.5	47	20		93	13	25	3.1	11	2.29	0.29	2.16	0.38	2.37	0.43	1.25	0.2
Jiang, Y., et al., 2014	AR-2	110		37.6583	75.1333	0.70864				72.67	0.23	14.35	1.88		0.05	0.55	1.61	3.07	4.71	0.14		18.4	4.4		4.2				19		193	207	15.8	88	18		412	22	39	4.8	17	3.61	0.57	3.08	0.51	3.03	0.58	1.63	0.27
Jiang, Y., et al., 2014	AR-3	110		37.6583	75.1333	0.71435				72.29	0.23	14.52	1.88		0.05	0.55	1.65	3.11	4.72	0.14		17.8	6.5		2.9				21		192	190	15.2	122	20.3		384	25	51	5.9	21	4.2	0.59	3.43	0.51	2.87	0.53	1.44	0.23
Jiang, Y., et al., 2014	AR-4	110		37.6583	75.1333	0.70753				69.79	0.42	15.23	2.56		0.05	0.78	1.55	3.18	4.54	0.24		26.5	10.8		4.7				24		184	178	9	231	21.1		583	54	96	13.4	44	7.59	0.95	4.46	0.45	2.18	0.33	0.83	0.12
Jiang, Y., et al., 2014	HQ-1	102		36.9167	75.4834	0.70783				68.18	0.35	15.57	2.72		0.05	1.31	3.5	2.91	4.33	0.14		53	24.2		4.1				18		178	409	17.7	149	9.2		729	51	95	10	34	6.17	1.43	5.05	0.67	3.67	0.69	1.98	0.28
Jiang, Y., et al., 2014	HQ-2	102.2	1.4	36.9167	75.4834	0.70783				66.4	0.52	14.8	4.17		0.07	2.09	3.75	2.54	4.26	0.18		84.6	39		7.3				17		161	366	21.4	212	11.3		829	52	98	11	40	6.91	1.38	5.86	0.78	4.29	0.83	2.44	0.34
Jiang, Y., et al., 2014	HQ-3	102		36.9167	75.4834	0.70784				65.73	0.53	14.3	4.5		0.08	2.43	3.95	2.34	4.19	0.21		99.8	52		7.6				17		159	383	23.2	229	11.1		920	44	84	10.1	37	6.97	1.45	6.28	0.84	4.8	0.88	2.56	0.35
Jiang, Y., et al., 2014	KL-1	114		37.1667	75.25	0.71471				73.29	0.26	14.38	1.66		0.03	0.55	1.81	3.18	3.75	0.14		14.5	7.3		1.7				19		133	227	7.5	102	6.3		821	36	78	8.2	30	5	1	4	0	2	0	1	0
Jiang, Y., et al., 2014	KL-2	114		37.1667	75.25	0.70982				69.53	0.45	15.37	3.15		0.06	1.36	2.95	3.01	3.34	0.2		54	28.8		5.5				18		148	452	15.1	138	14.3		770	40	81	8.7	31	5.71	1.42	4.63	0.64	3.24	0.59	1.74	0.25
Jiang, Y., et al., 2014	KL-3	114.1	2.7	37.1667	75.25	0.71571				72.83	0.32	14.55	2.03		0.03	0.6	1.63	3.17	3.66	0.14		14.3	7.3		2.1				20		136	197	7	134	7.3		828	46	87	9.9	38	6.34	1.23	4.33	0.5	1.94	0.24	0.55	0.06
Jiang, Y., et al., 2014	KL-4	114		37.1667	75.25	0.71001				67.88	0.6	15.21	3.8		0.06	1.22	2.23	3.51	3.84	0.28		46.1	19.9		8				22		212	181	28.1	223	19.2		561	54	100	11.2	43	7.4	1.07	6.33	0.99	5.5	1.03	3.09	0.45
Jiang, Z., et al., 2012	07TB33a-1	91.3	1.6	29.35	91.4167					58.96	0.97	16.62	6.44		0.1	3.36	5.47	3.69	3.1	0.26	13.2	138	50	16.9	27	74.7		72.1	17	1.37	91.4	716	16	143	7.6		366	28.3	59.5	7.41	29.2	5.05	1.29	3.99	0.57	3.02	0.57	1.56	0.23
Jiang, Z., et al., 2012	07TB33a-2	92	2	29.35	91.4167					52.17	1.05	17.07	8.46		0.13	5.57	8.08	3.86	2.23	0.31	16.8	220	86	23.8	48	78.3		111	16.8	1.22	41.3	937	13.4	57	4		297	20.2	42.4	5.54	21.9	4.03	1.28	3.28	0.48	2.58	0.5	1.35	0.19
Jiang, Z., et al., 2012	07TB33b-1	92	2	29.35	91.4167					58.48	1.01	15.8	6.95		0.09	3.12	5.22	3.83	3.21	0.29	14.6	143	45	20.5	41	336		70.2	16.6	1.22	102	693	17.5	97	8.3		357	30	62.2	7.83	30.8	5.48	1.3	4.29	0.63	3.32	0.63	1.72	0.25
Jiang, Z., et al., 2012	07TB33b-2	93.3	2	29.35	91.4167			12.69		59.26	0.97	16.6	6.68		0.1	3.18	5.11	3.59	3.31	0.26	13.8	136	43	17.5	27	79		73.4	18.3	1.25	87.1	735	16.6	127	8.2		437	29.9	62.3	7.74	30.4	5.24	1.32	4.07	0.59	3.12	0.59	1.65	0.24
Jiang, Z., et al., 2012	07TB33c-1	92	2	29.35	91.4167					52.77	0.55	18.8	7.44		0.14	5.55	8.03	4.03	1.32	0.16	20.8	165	18	14.4	11	46.6		66.6	13.7	1.21	42.4	656	10.5	43	0.8		144	8.3	18.1	2.55	11.2	2.37	0.85	2.05	0.32	1.91	0.39	1.11	0.17
Jiang, Z., et al., 2012	07TB33d	90.3	2.1	29.35	91.4167					52.86	0.58	18.69	7.04		0.13	5.54	8.57	4.18	0.64	0.14	24.2	203	23	14.1	12	30.2		80.5	17	1.48	20.2	745	10.8	41	1.2		128	11.3	22.4	2.92	12.4	2.5	1.04	2.25	0.35	2.01	0.41	1.17	0.18
Jiang, Z., et al., 2012	07TB33e	92	2	29.35	91.4167					57.69	0.97	16.75	6.47		0.1	3.55	5.79	3.65	3.06	0.27	14.1	144	55	15.8	31	49.3		73.3	17.2	1.4	82.4	762	15.8	155	7.1		393	27.3	56.7	7.19	28.2	4.84	1.28	3.84	0.54	3.04	0.58	1.54	0.23
Jiang, Z., et al., 2014	07TB03	31		29.2497	91.9083					65.8	0.48	16.22	3.89		0.05	1.78	3.47	3.9	4.05	0.19	6.38	64.7	30.7	9.94	17.6				16.8		126	789	9.82	94.9	12.3	7.5	926	55.2	99.2	10.9	37.8	5.29	1.22	3.69	0.421	1.94	0.344	0.961	0.133
Jiang, Z., et al., 2014	07TB04	31		29.25	91.9081					65.11	0.52	15.81	4.26		0.06	2.05	3.65	3.85	3.63	0.22	5.63	59.2	26.1	8.53	16.2				15.9		130	867	9.71	127	10.8	8.81	1221	51	90.1	10.1	36.1	5.21	1.23	3.55	0.417	1.95	0.348	0.953	0.136
Jiang, Z., et al., 2014	07TB09	31		29.2678	91.9158					68.16	0.37	16.16	3.1		0.05	1.06	2.8	4.14	3.89	0.14	3.9	44	11.4	5.92	8.29				16.3		143	649	7.82	149	13.3	7.75	733	36.7	66.2	7.47	25.8	3.67	0.861	2.64	0.317	1.52	0.276	0.758	0.112
Jiang, Z., et al., 2014	07TB10b	31		29.2681	91.915					54.76	1.8	16.64	9.66		0.19	3.47	6.28	4.8	1.36	0.47	16.3	199	11.3	19.1	16.5				22.3		73.6	539	30.5	46.3	44.3	8.27	81.3	65	140	19.1	70.3	11.1	2.96	8.54	1.16	5.91	1.13	3.03	0.44
Jiang, Z., et al., 2014	07TB10c	31		29.2681	91.915					68.31	0.38	15.93	3.21		0.06	1.11	2.98	4.23	3.46	0.15	4.55	43.3	11	6.25	8.95				18		141	679	8.71	161	14.6	8.13	504	58.6	94.3	9.7	32	4.34	0.942	3.18	0.353	1.71	0.307	0.867	0.13
Jiang, Z., et al., 2014	07TB11	30.2		29.2692	91.9114					64.7	0.52	16.08	4.32		0.06	2.24	3.71	3.82	4	0.22	6.85	79.2	29.7	11	20				16.6		118	857	9.6	135	10.5	7.15	1319	47.9	88.2	9.89	34.8	4.99	1.17	3.45	0.426	1.99	0.355	0.985	0.14
Jiang, Z., et al., 2014	07TB12	31		29.2689	91.905					64.68	0.52	16.26	4.16		0.07	2.03	3.63	3.87	4.1	0.22	6.03	66.8	26.5	10	17.3				16.3		123	881	10.8	161	12	7.92	1210	58.7	103	11.7	40.9	5.85	1.28	3.94	0.466	2.19	0.38	1.04	0.15
Jiang, Z., et al., 2014	07TB13	31		29.2697	91.8944					57.76	0.92	15.88	6.56		0.1	4.67	4.49	3.84	3.62	0.41	14.2	115	140	19.4	47.2				20.9		302	594	15.5	137	15.1	53	810	83.3	143	16.7	62.2	9.27	1.49	6.41	0.731	3.31	0.557	1.49	0.207
Jiang, Z., et al., 2014	07TB15a	31		29.2711	91.8917					64.56	0.52	15.93	4.44		0.07	2.11	3.86	3.87	3.82	0.23	7.14	69.1	33	10.3	17.4				17.2		128	849	11.4	103	12.6	7.85	1195	58.9	108	12	42.5	5.98	1.32	4.07	0.479	2.24	0.399	1.06	0.156
Jiang, Z., et al., 2014	07TB16	76.5		29.2578	91.8517					58.69	0.71	17.81	7.14		0.11	3.31	6.33	3.48	1.7	0.15	17.1	130	27.1	17.5	11.5				16.4		28.3	601	21.2	52.4	4.41	3.15	391	16.7	36.2	4.96	20.8	4.31	1.09	3.82	0.673	3.95	0.818	2.31	0.334
Jiang, Z., et al., 2014	07TB17	76.5		29.2578	91.8511					60.88	0.63	17.11	6.33		0.1	2.84	5.37	3.49	2.58	0.14	15.8	113	21.2	15.4	10.6				16.3		51.9	608	19	65.4	4.28	5.91	499	17.6	36.3	4.8	19.9	3.97	1.01	3.55	0.607	3.54	0.734	2.07	0.306
Jiang, Z., et al., 2014	07TB18	76.5		29.2567	91.8456			9.70667		60.24	0.65	16.93	6.29		0.1	2.96	5.8	3.41	2.36	0.14	16.1	128	21.2	14.7	10.6				15.8		44.1	493	20.2	80.7	4.51	3.87	440	17.3	37.2	4.85	20	4.13	0.986	3.66	0.633	3.73	0.778	2.23	0.333
Jiang, Z., et al., 2014	07TB19	76.5		29.2569	91.8453					59.78	0.68	17.05	7.01		0.11	3.14	6.08	3.38	1.88	0.14	16.9	132	25.8	17.2	10.2				16.4		50.5	506	18	39.5	4.11	6.61	356	16.1	33.7	4.34	17.9	3.52	0.996	3.19	0.551	3.28	0.662	1.87	0.278
Jiang, Z., et al., 2014	07TB20a	76.5		29.2581	91.8419					60.47	0.64	17.16	6.27		0.1	2.84	5.65	3.46	2.31	0.13	16	115	17.3	13.8	9.37				16		47.9	510	23.7	67.1	4.69	5.02	396	16.7	36.6	5.04	21.4	4.54	1.02	4.09	0.708	4.24	0.883	2.5	0.371
Jiang, Z., et al., 2014	07TB21	76.5		29.2581	91.8419					60.13	0.65	16.98	6.48		0.11	2.96	5.68	3.48	2.13	0.14	15.4	115	17.7	14.6	8.9				15.4		38.8	517	20.2	50.8	4.57	2.84	405	15.8	34.8	4.72	20.1	4.04	0.94	3.6	0.618	3.8	0.77	2.16	0.323
Jiang, Z., et al., 2014	07TB22a	62		29.2658	91.8214					66.39	0.4	15.66	4.29		0.08	1.61	3.89	3.27	3.26	0.09	8.49	65.5	12.6	9.45	5.99				14		75	383	12.9	92.2	4.44	3.96	472	16.6	32.3	3.94	14.6	2.67	0.716	2.35	0.395	2.39	0.489	1.45	0.234
Jiang, Z., et al., 2014	07TB22b	62		29.2658	91.8214					66.37	0.41	15.47	4.48		0.08	1.68	3.68	3.19	3.73	0.09	8.88	69.9	12.7	9.97	5.7				14.4		80.3	382	13	77.9	3.86	4.2	495	10.7	22.6	3.03	12.4	2.49	0.692	2.2	0.379	2.32	0.48	1.39	0.225
Jiang, Z., et al., 2014	07TB23	62		29.265	91.8197					67.39	0.4	14.8	4.88		0.08	1.53	3.17	3.06	4.02	0.08	8.85	64.8	16.9	8.73	7.38				13		84.6	315	11.5	83.4	4.13	4.36	438	19.1	35.3	3.97	14.3	2.46	0.633	2.12	0.344	2.03	0.424	1.25	0.199
Jiang, Z., et al., 2014	07TB24a	62		29.2642	91.8181					70.78	0.27	15.15	2.65		0.03	0.75	2.23	3.46	3.63	0.05	2.91	33.2	12.3	3.91	3.72				11.1		63	331	7.01	66.9	3.9	6.59	361	14.1	24.4	2.53	8.29	1.27	0.423	1.09	0.185	1.12	0.24	0.768	0.132
Jiang, Z., et al., 2014	07TB24c	62		29.265	91.8167					65.85	0.45	16.17	4.97		0.08	1.86	4.02	3.14	2.94	0.09	8.34	75.3	15.9	10.3	7.12				14.1		65	377	11	74	3.79	4.53	403	24.9	42.6	4.52	15.1	2.4	0.67	2.14	0.332	1.89	0.387	1.16	0.17
Jiang, Z., et al., 2014	07TB24d	62		29.265	91.8167					67.18	0.42	15.03	4.46		0.08	1.73	3.44	3.02	3.68	0.08	8.55	74.1	12.4	9.6	6.06				13		78.5	333	11.1	84.5	4.17	4.57	467	16.3	30.1	3.49	12.6	2.24	0.627	1.95	0.325	1.99	0.411	1.2	0.193
Jiang, Z., et al., 2014	07TB25a	62		29.2622	91.8086			7.35714		64.67	0.48	16.16	4.85		0.08	2.06	4.17	3.22	3.24	0.09	10.3	84.4	14.7	11.3	6.17				14.6		71.2	394	12.6	68.9	4.22	3.96	458	15.4	29.8	3.56	13.8	2.61	0.737	2.3	0.388	2.33	0.485	1.42	0.223
Jiang, Z., et al., 2014	07TB25b	61.3		29.2622	91.8086			10.3		56.45	0.69	17.42	7.84		0.15	3.54	5.85	3.65	2.49	0.13	18.1	152	19.9	19.4	7.84				15.9		57	459	18.6	20.9	4.48	3.53	395	13.5	32	4.22	17.3	3.53	1.03	3.17	0.556	3.4	0.718	2.14	0.33
Jiang, Z., et al., 2014	07TB26a	61.3		29.2647	91.8106					64.14	0.49	15.79	5.31		0.09	2.12	4.14	3.12	3.25	0.1	9.93	84.7	16.3	12.1	7.35				14.5		79.3	392	13.5	81.9	4.67	4.83	471	17.4	33.3	3.91	14.5	2.61	0.721	2.34	0.396	2.38	0.491	1.43	0.226
Jiang, Z., et al., 2014	07TB26b	61.3		29.2647	91.8078					53.63	0.79	17.89	8.83		0.19	4.24	6.63	3.94	1.74	0.16	20.6	156	11.7	20.7	9.44				17.7		58.2	392	24.7	75	6.75	3.59	295	20	44.7	5.92	23.8	4.59	0.956	4.23	0.711	4.23	0.88	2.69	0.42
Jiang, Z., et al., 2014	07TB27	61.3		29.2661	91.8133					63.9	0.5	16.02	5.06		0.08	2.1	4.31	3.27	2.84	0.11	10.2	84	17.1	11.5	6.95				14.6		59.3	394	12.2	67.8	4.21	4.26	411	23	41.8	4.54	16.3	2.74	0.722	2.38	0.38	2.24	0.453	1.34	0.211
Jiang, Z., et al., 2014	07TB28a	61.5		29.3553	91.4153			11.65		59.79	0.49	17.51	6.75		0.1	2.57	6.07	3.6	1.64	0.18	7.17	125	175	15.3	21.6				16.3		26	511	14.8	60	3.01		301	13.8	27.1	3.39	13.7	2.68	0.846	2.51	0.401	2.44	0.491	1.44	0.21
Jiang, Z., et al., 2014	07TB28b	61.7		29.3553	91.4153			12.7727		56.52	0.79	17.71	8.39		0.17	3.94	6.68	3.35	1.47	0.15	27.2	212	98	24	44.7				17.8		34.3	495	22.3	47.5	4.04	2.28	273	14.2	32.8	4.49	18.6	3.88	1.01	3.49	0.594	3.62	0.793	2.27	0.344
Jiang, Z., et al., 2014	07TB29a	61.5		29.3547	91.4133					59.12	0.6	16.62	6.75		0.11	2.67	5.95	3.22	1.68	0.16	6.31	134	118	17.2	10.4				16.4		32.1	514	15.3	50.4	2.95		310	14.2	27.3	3.31	13.2	2.55	0.802	2.49	0.414	2.46	0.503	1.46	0.224
Jiang, Z., et al., 2014	07TB29b	61.5		29.3547	91.4133					56.64	0.81	17.05	8.68		0.16	3.69	6.95	3.32	1.5	0.14	6.1	217	108	22.6	13.4				17.1		30.2	487	20.5	33.2	3.67		258	13	29.5	4	17	3.46	0.914	3.33	0.56	3.42	0.707	2.07	0.314
Jiang, Z., et al., 2014	07TB30a	61.5		29.3544	91.4183					55.68	0.82	17.54	8.99		0.16	3.53	6.84	3.35	1.73	0.23	9.45	169	116	22.6	12.2				16.8		32.2	489	12.5	15.2	3.75		240	14.4	29.5	3.64	13.9	2.45	0.892	2.25	0.329	1.97	0.422	1.27	0.197
Jiang, Z., et al., 2014	07TB30b	61.5		29.3544	91.4183					59.44	0.64	17.21	7.32		0.12	2.79	6.26	3.41	1.59	0.2	8.18	145	122	16.5	9.67				16.3		27.7	521	14.4	27.9	2.78		284	14.1	28.2	3.46	13.8	2.65	0.867	2.52	0.412	2.36	0.502	1.45	0.223
Jiang, Z., et al., 2014	07TB31	61.5		29.3519	91.4172					60.66	0.58	17.15	6.55		0.12	2.53	5.71	3.51	1.33	0.18	7.18	129	113	14.6	8.76				16.6		20.2	519	15.1	66.3	3.07		248	15.8	31.1	3.81	15.1	2.83	0.838	2.66	0.398	2.45	0.51	1.42	0.215
Jiang, Z., et al., 2014	07TB32	61.5		29.3514	91.4169					60.59	0.58	17.1	6.57		0.11	2.55	5.6	3.92	1.9	0.18	7.5	126	153	14.5	8.89				15.6		32.5	486	14.1	36.7	3.01		312	15.5	29.9	3.6	14	2.56	0.799	2.47	0.405	2.29	0.484	1.39	0.211
Jiang, Z., et al., 2014	09TB117-1	91.1		29.3019	91.4083			12.4867		50.94	1.39	17.02	8.96		0.13	5.02	8.91	3.07	1.96	0.2	29.8	312	19.8	63.6	58.3				18		40.8	784	12.8	46.4	4.07	1.33	367	21.5	43	5.21	19.1	3.8	1.48	3.36	0.479	2.49	0.464	1.2	0.168
Jiang, Z., et al., 2014	09TB118-1	91.1		29.3575	91.4172					50.48	1	17.74	8.34		0.16	5.71	10.01	2.73	1.36	0.22	29.2	227	161	54.7	82				18.2		37.3	922	14.5	60.1	3.75	1.88	237	13.6	30.6	4.24	17	3.65	1.17	3.22	0.491	2.68	0.507	1.4	0.19
Jiang, Z., et al., 2014	09TB119	91.1		29.3539	91.4325					61.7	0.61	16.21	6.37		0.11	2.67	5.42	3.2	2.33	0.12	17.6	126	9.01	61.9	7.59				15.8		46.7	429	20.5	52	3.83	3.12	370	15.2	33.3	4.41	16.5	3.49	0.959	3.31	0.543	3.29	0.69	2.03	0.31
Jiang, Z., et al., 2014	09TB120	91.1		29.3528	91.4339					61.52	0.67	16.5	6.44		0.1	2.7	5.42	3.28	2.27	0.14	15.7	131	10.1	55.5	8.88				16.5		52.2	447	19.4	51	4.05	3.47	357	15	32.8	4.37	16.3	3.37	0.913	3.15	0.534	3.05	0.668	1.89	0.286
Jiang, Z., et al., 2014	09TB122	91.8		29.1444	91.4333					66.61	0.5	15.48	3.47		0.05	1.81	3.26	3.66	3.97	0.13	6.55	75.6	28.5	61	17.8				16.2		129	513	9.68	77.2	5.67	4.73	448	23.7	45.3	5.14	17	2.82	0.797	2.18	0.306	1.61	0.319	0.873	0.126
Jiang, Z., et al., 2014	09TB123-1	91.8		29.3061	91.45					64.18	0.62	16.55	4.2		0.08	1.7	3.69	4.08	3.73	0.23	5.94	80.4	2.93	61.9	6.8				18		91.6	747	12.6	125	5.86	3.38	506	24.6	50.8	6.17	22.1	3.74	1.09	3.02	0.421	2.16	0.42	1.13	0.162
Jiang, Z., et al., 2014	09TB124	91.8		29.3025	91.4553			12.7067		74.2	0.19	13.99	0.98		0.04	0.33	0.77	3.85	4.82	0.03	1.12	13.9	0.15	83.2	1.12				14.2		157	152	8.67	117	8.25	3	375	32.3	53.2	5.17	14.3	2.06	0.421	1.74	0.224	1.31	0.264	0.793	0.143
Jiang, Z., et al., 2014	09TB125	91.8		29.3039	91.4608					57.27	0.94	17.01	6.86		0.11	3.69	6.43	3.88	2.24	0.32	15	162	56.8	38.9	36.8				19.1		60.2	956	15.8	121	5.43	3.86	524	24.3	52.6	6.77	25.6	4.73	1.42	4	0.543	2.9	0.544	1.42	0.208
Jiang, Z., et al., 2014	09TB128	48		29.3	91.5664			10.88		65.86	0.61	15.44	4.59		0.09	1.66	3.52	3.42	3.64	0.14	9.24	80.3	5.49	61.2	5.53				15.9		104	370	22.8	218	7.33	6.43	543	22	48.4	6.27	22.9	4.55	0.923	4.08	0.636	3.74	0.777	2.16	0.334
Jiang, Z., et al., 2014	09TB129	48		29.3097	91.6028					60.26	0.75	16.5	6.64		0.1	2.87	5.17	3.32	2.64	0.18	15.2	132	19.1	50.1	12.2				17.2		74.5	537	21.9	111	5.94	6.01	531	21.2	47	6.13	22.6	4.58	1.15	4.06	0.636	3.67	0.74	2.1	0.311
Jie et al., 2018	D03-YQ1	36		25.625	100.408					58.33	0.8	14.61	0.45	1.35	0.1	6.16	8.5	4.6	2.83	0.55	15.4	106.7	202.9	8.3	71.3	18.4	1.21		12.2		279	934	15.1	193	13	10.65	612	44.8	93.6	13.2	55.2	8.76	1.71	6.71	0.75	3.14	0.51	1.5	0.23
Jie et al., 2018	D01-YQ1	36		25.5834	100.442					66.49	0.34	16.12	2.22	0.48	0.04	0.94	1.54	4.29	5.99	0.14	4.24	80.4	33.4	4.2	12.7	68	0.52		19.5		175	980	14.97	195	10.76	5.49	2367	34.9	64.22	7.9	29.07	5	1.35	4.11	0.61	2.88	0.51	1.42	0.2
Jie et al., 2018	D01-YQ4	36		25.575	100.434					64.48	0.53	15.89	1.84	1.56	0.07	1.57	2.27	4.58	5.27	0.36	7.31	98.1	28.9	7.8	21.4	27.2	0.65		19.3		154	1063	19.86	218	13.8	3.91	2406	36.98	73.06	9.25	34.88	6.45	1.74	5.26	0.78	3.89	0.68	1.86	0.29
Jie et al., 2018	D05-YQ1	36		25.65	100.467					65.77	0.4	15.57	1.77	0.88	0.04	0.76	2.21	3.68	6.93	0.23	7.11	49.4	13.2	9.3	8.45	1975	0.71		18.5		262	923	17.3	195	9.19	4.3	1986	24.6	52.8	6.42	27	4.82	1.33	4.15	0.58	3.04	0.54	1.56	0.28
Jie et al., 2018	D07-YQ1	36		25.6167	100.533					67.87	0.34	15.9	1.66	0.33	0.04	0.71	1.27	4.07	6	0.18	5.94	42.3	32.1	7.5	15.3	94.4	0.81		21.2		243	533	17.8	223	14.4	3.8	1472	48.8	95	10.2	37.9	6.33	1.52	5.56	0.74	3.37	0.56	1.64	0.29
Jie et al., 2018	D02-YQ1	36		25.567	100.458					65.67	0.33	15.84	2.17	0.72	0.04	1.19	1.97	4.12	6.19	0.15	7.18	49	69.2	6.7	19.6	45.9	0.65		20.5		255	1247	17.9	199	9.48	7.4	2871	22.7	55.7	7.23	30.9	5.63	1.53	4.52	0.65	3.18	0.57	1.66	0.28
Jie et al., 2018	D09-YQ1	36		25.55	100.542					62.48	0.31	13.49	1.69	1.68	0.06	4.62	3.13	2.02	8.85	0.31	9.51	75.9	264.1	11.1	89.3	2046	29.6		17.4		248	436	17.1	261	10.4	5.83	966	27.9	56.5	6.56	26	4.77	1.44	4.03	0.57	3.06	0.55	1.62	0.3
[truncated: 4,530 more rows]
[truncated: 13 more columns]
